# Supplementary material for: Insights into the alkylation of benzene with olefins: effect of chain length of the olefins
Source: Royal Society of Chemistry journal article supplement (doi:10.1039/d2cy01530g), 2022-01-01
Supplement: d2cy01530g1.pdf [file d2cy01530g1.pdf]

## **Supplementary Information**

### **Insights into the alkylation of benzene with olefins: effect of chain length of the olefins**

*Shi-Yong Xing, Yue-Hua Zhao, Tie-Feng Wang and Ming-Han Han\**

Beijing Key Laboratory of Green Chemical Reaction Engineering and Technology, Department of

Chemical Engineering, Tsinghua University, Beijing 100084, P. R. China.

\*Email: hanmh@mail.tsinghua.edu.cn

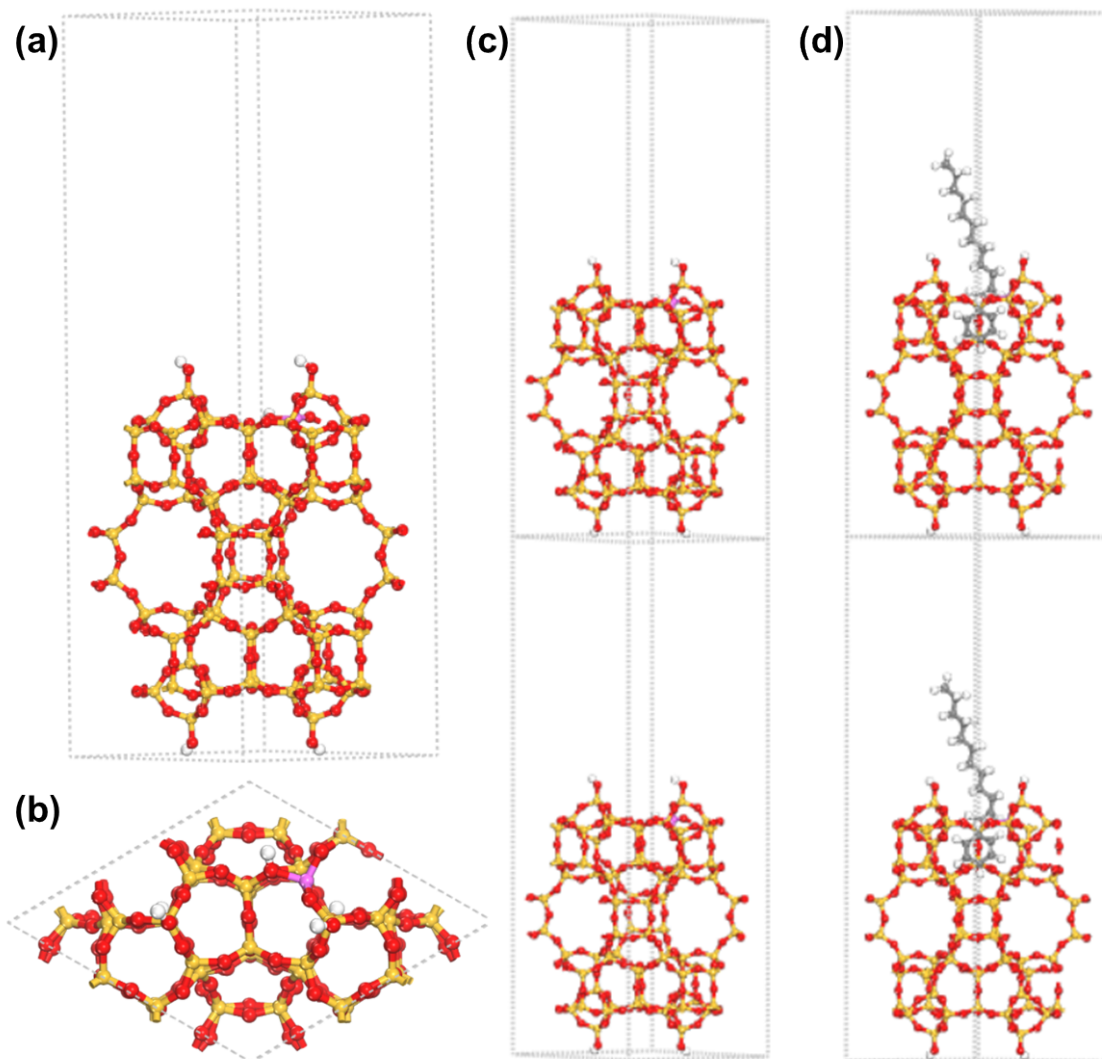

**Fig. S1.** (a, c) Side view and (b) top view of zeolite model with a vacuum slab of 25 Å along the c axis and (d) co-adsorption of 1-dodecene and benzene at the acid site.

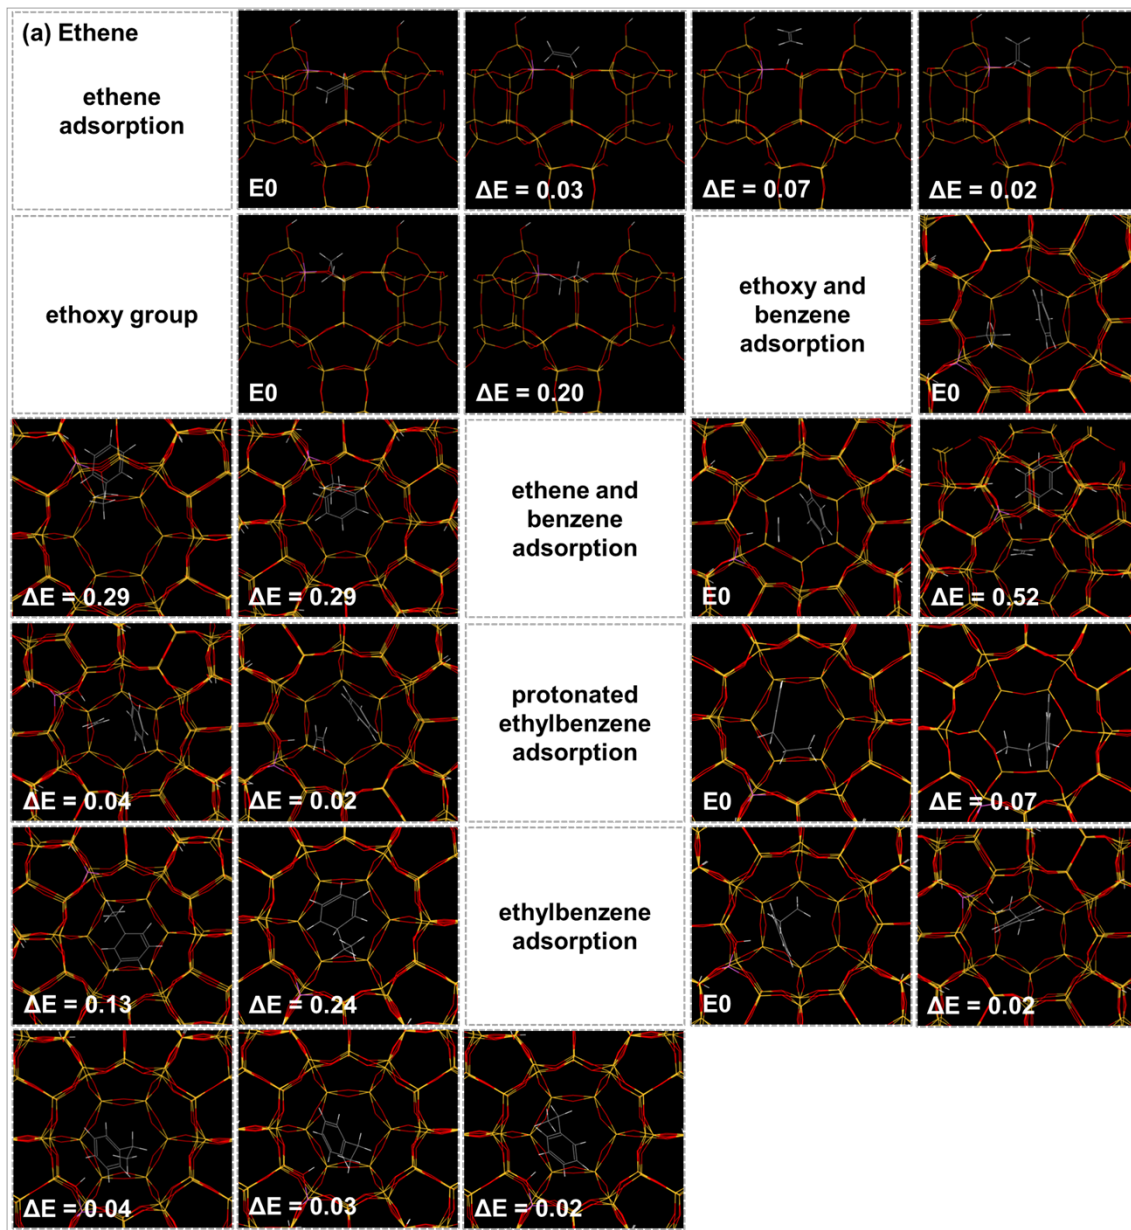

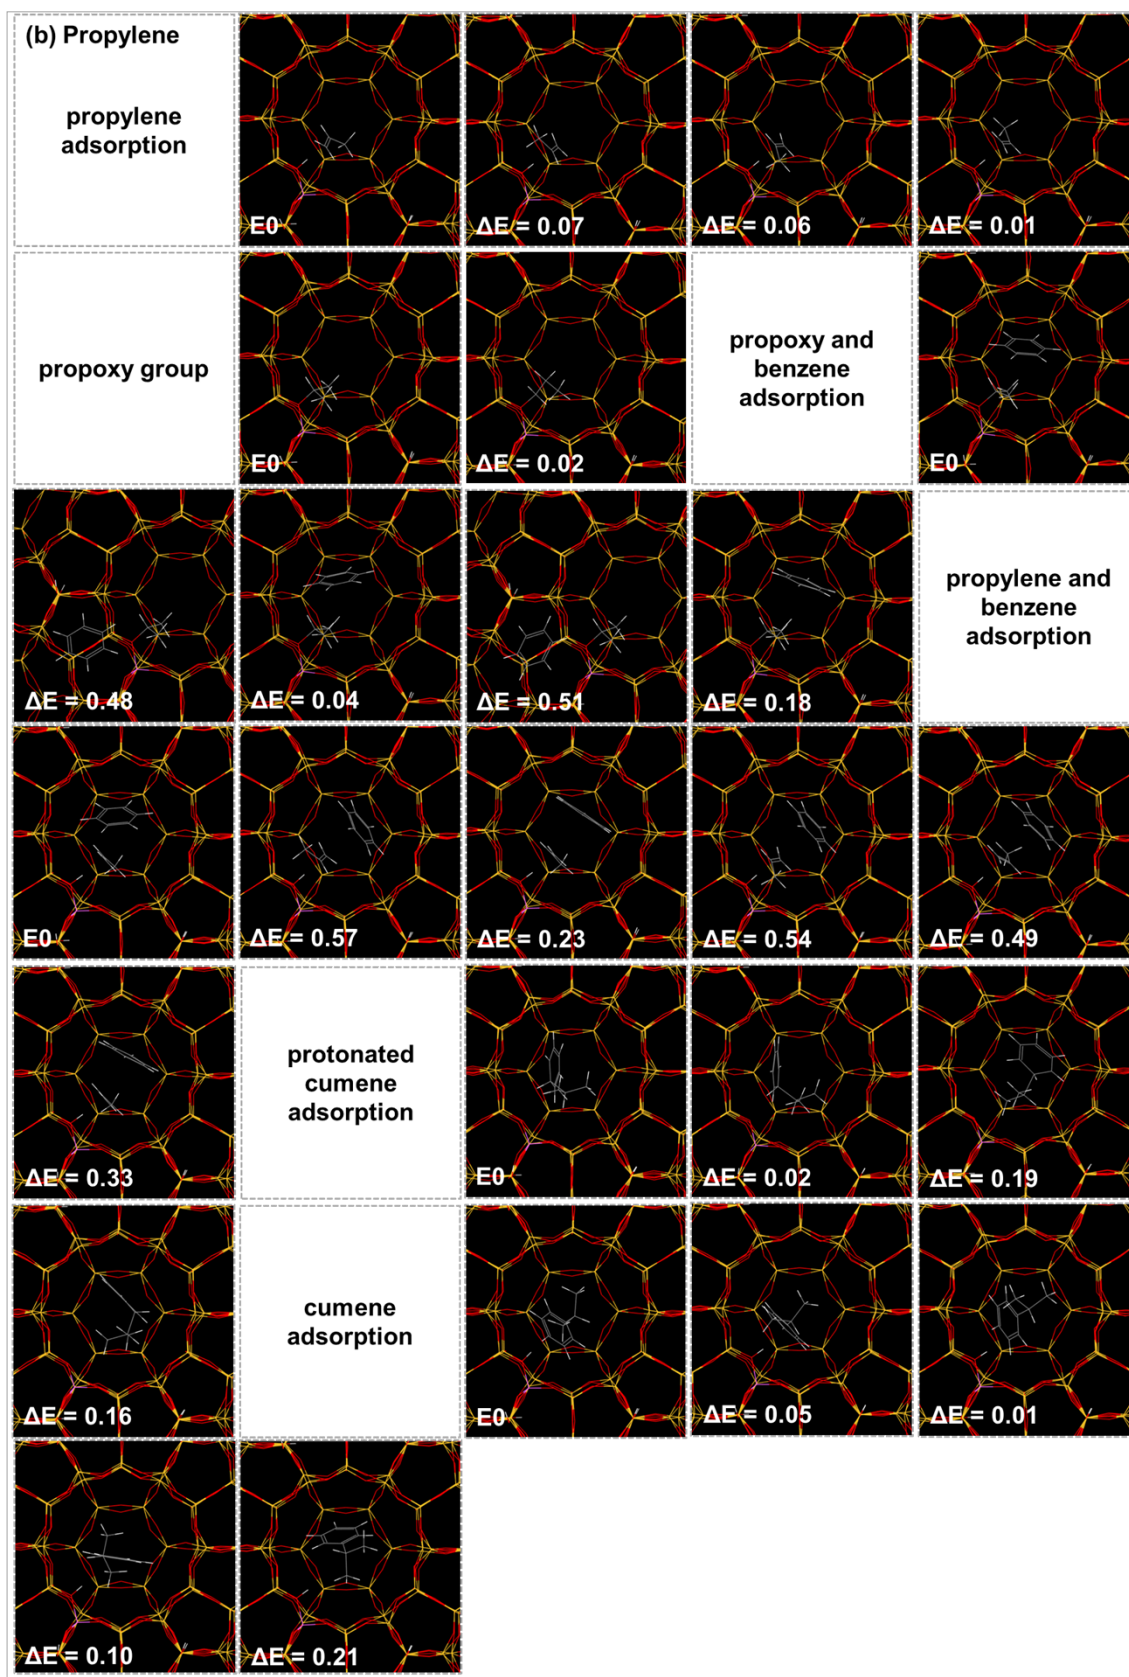



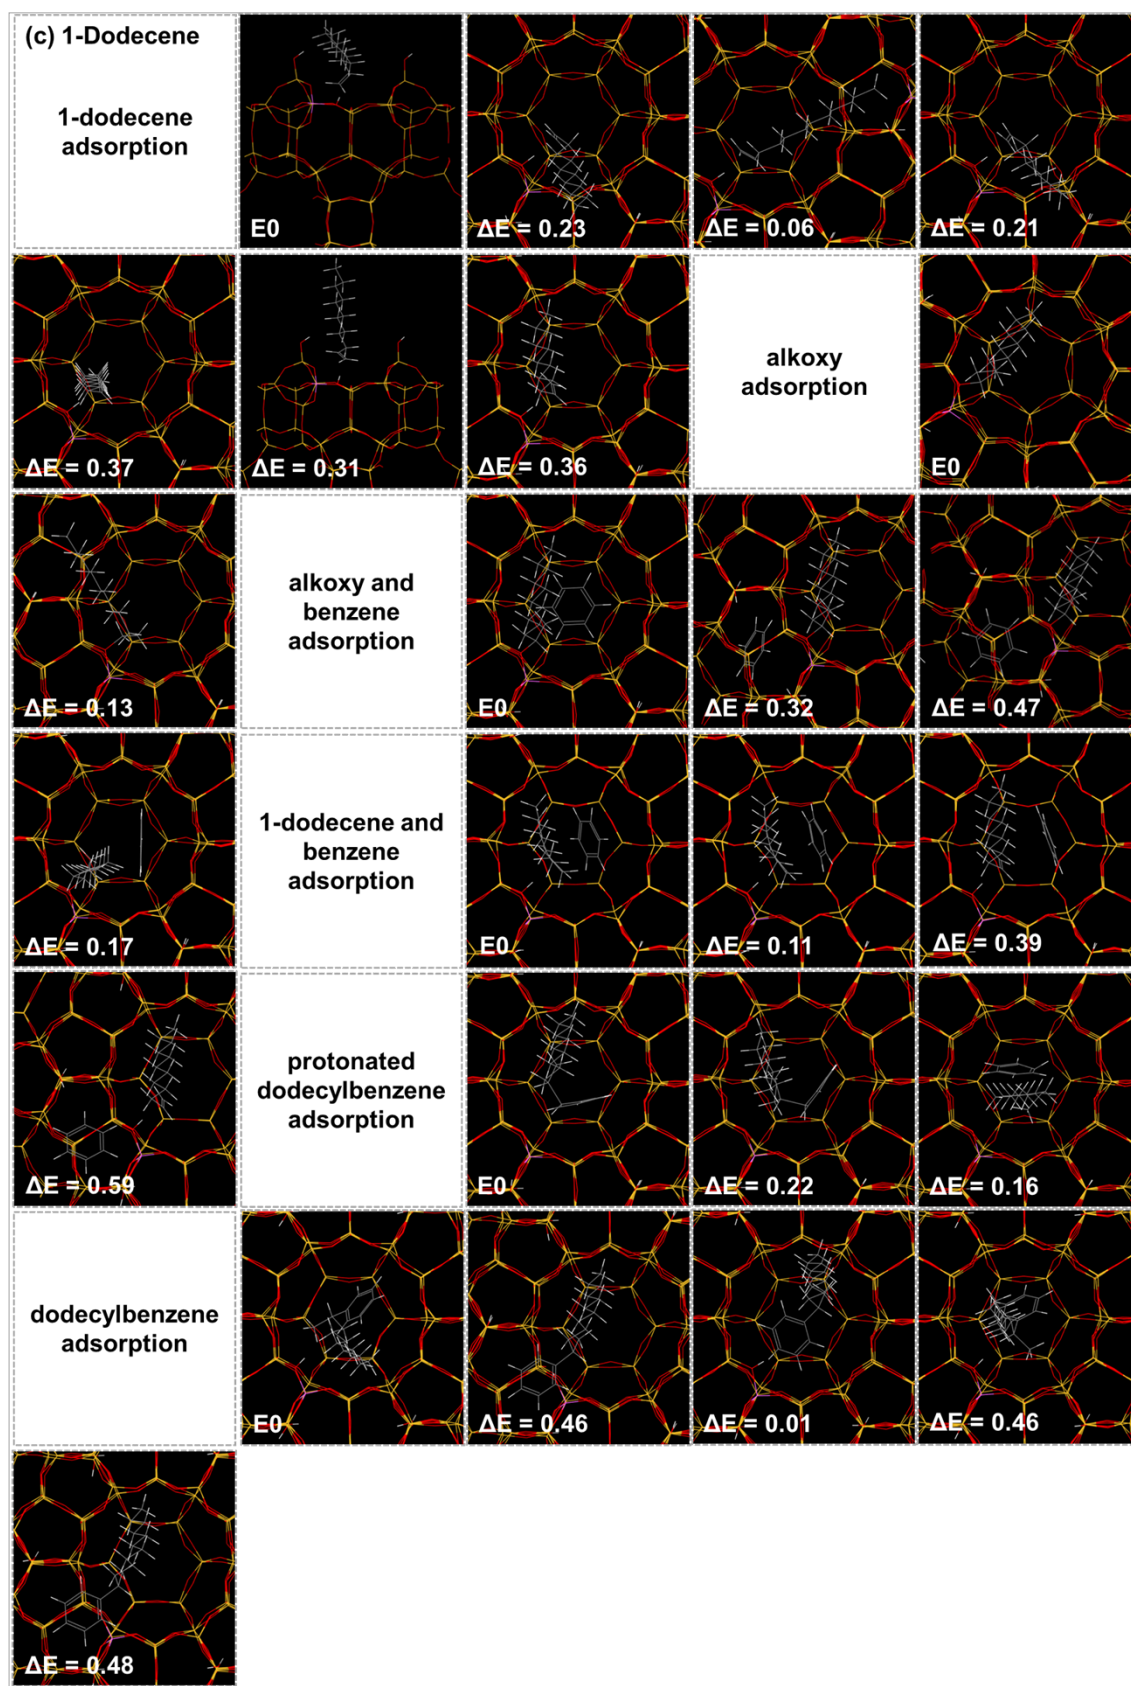

Fig. S2. All the considered orientations for each intermediate state along the reaction coordinate of

the alkylation of benzene with (a) ethene, (b) propylene, (c) 1-dodecene. The most thermodynamically favored orientation is labelled with  $E_0$ , to which the relative electronic energies of other candidates are also listed.

Different orientations for each intermediate state along the reaction coordinate has been considered. At least four orientations around the BAS were constructed and the most stable orientations were determined by DFT calculations as shown in Fig. S2. As can be seen, the structure orientation has a significant effect on the thermostability. Therefore, it's essential to do multi-geometries searching in the zeolite catalyzed systems before analyzing the reaction process.

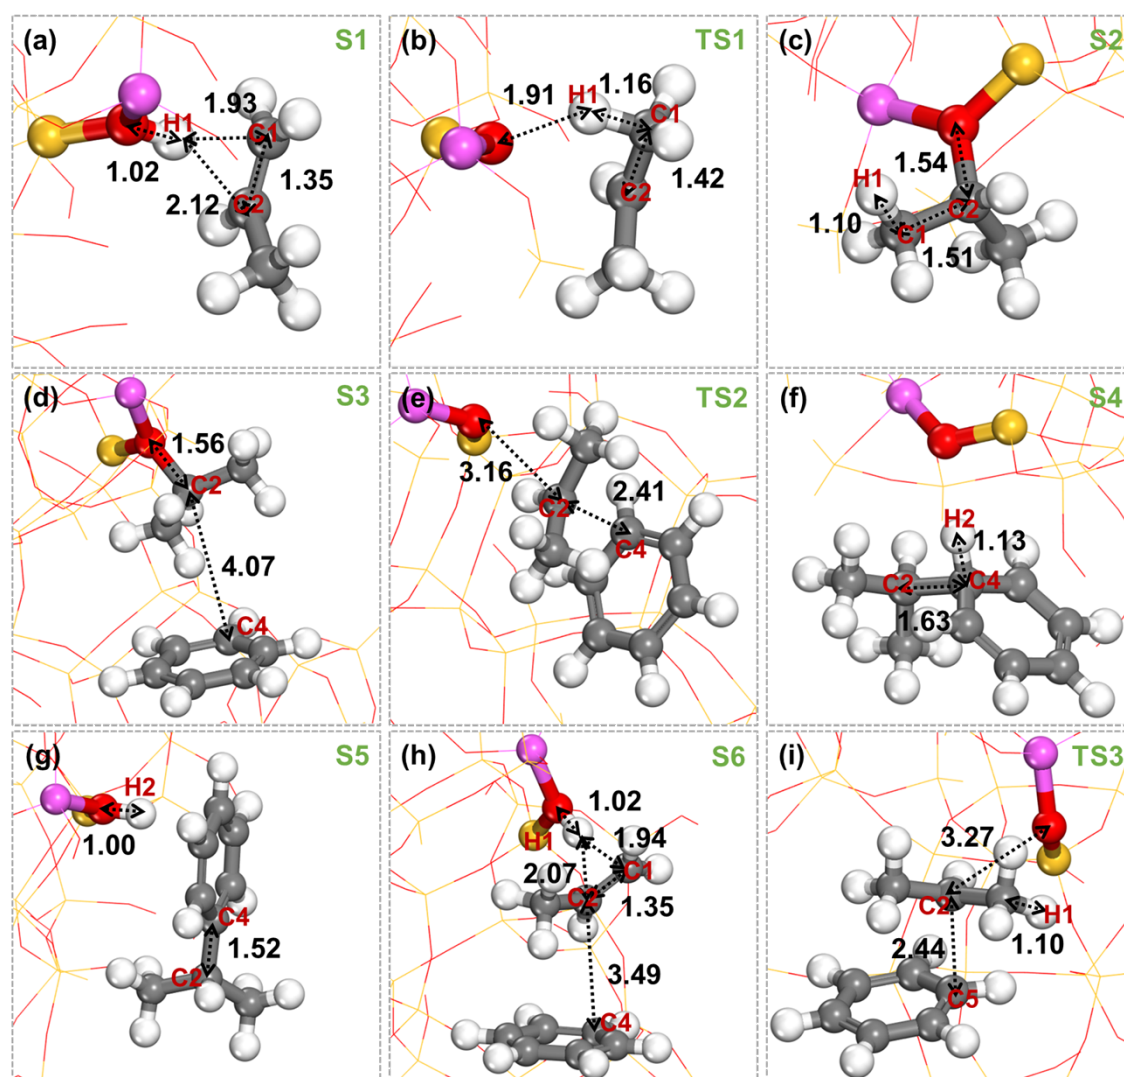

**Fig. S3.** Local geometry structures of all intermediates for the alkylation of benzene with propylene.

(a-i), corresponding to (a) adsorbed propylene, (b) TS1, (c) propoxy, (d) co-adsorption of propoxy and benzene, (e) TS2, (f) protonated cumene, (g) adsorbed cumene, (h) co-adsorption of propylene and benzene, (i) TS3.

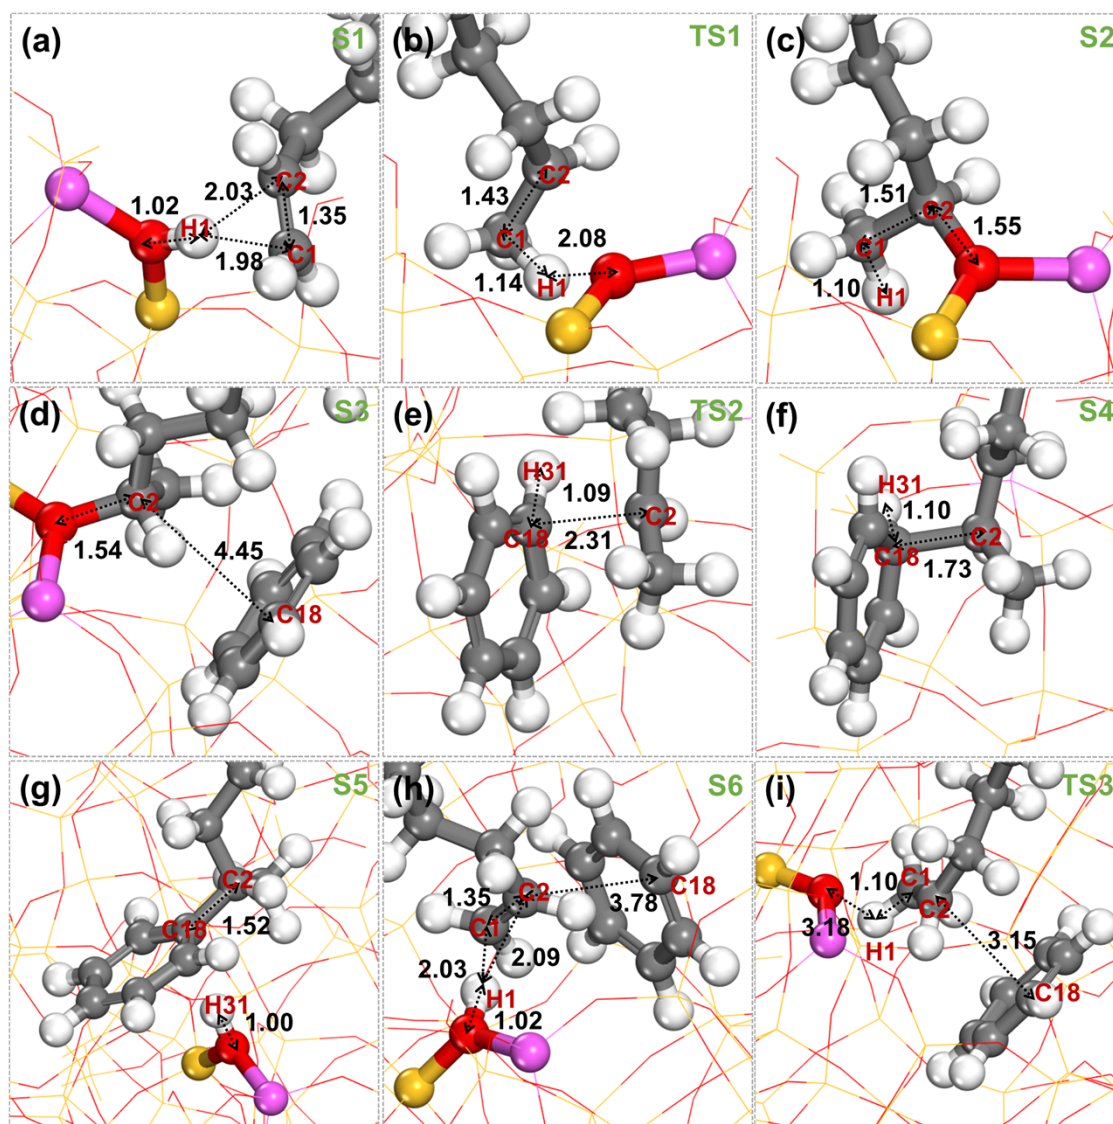

**Fig. S4.** Local geometry structures of all intermediates for the alkylation of benzene with 1-dodecene. (a-i), corresponding to (a) adsorbed 1-dodecene, (b) TS1, (c) dodecoxy, (d) co-adsorption of dodecoxy and benzene, (e) TS2, (f) protonated dodecylbenzene, (g) adsorbed dodecylbenzene, (h) co-adsorption of 1-dodecene and benzene, (i) TS3.

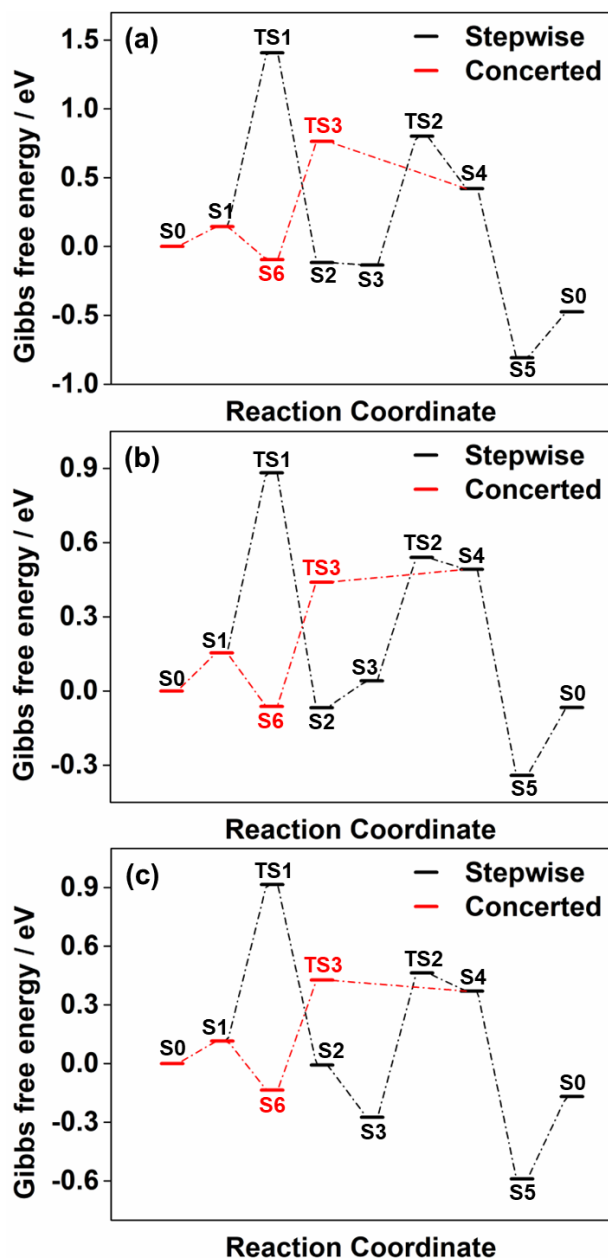

**Fig. S5.** Gibbs free energy diagrams of the complete reaction coordinate for the alkylation of benzene with (a) ethene, (b) propylene and (c) 1-dodecene at 450 K. The cycle consists of the stepwise and concerted mechanisms. The pressure of the gaseous molecular is 1 atm. Two S0 states in the initial and final states denote (H-zeolite + olefin (g) + benzene (g)) and (H-zeolite + alkylbenzene (g)), respectively.

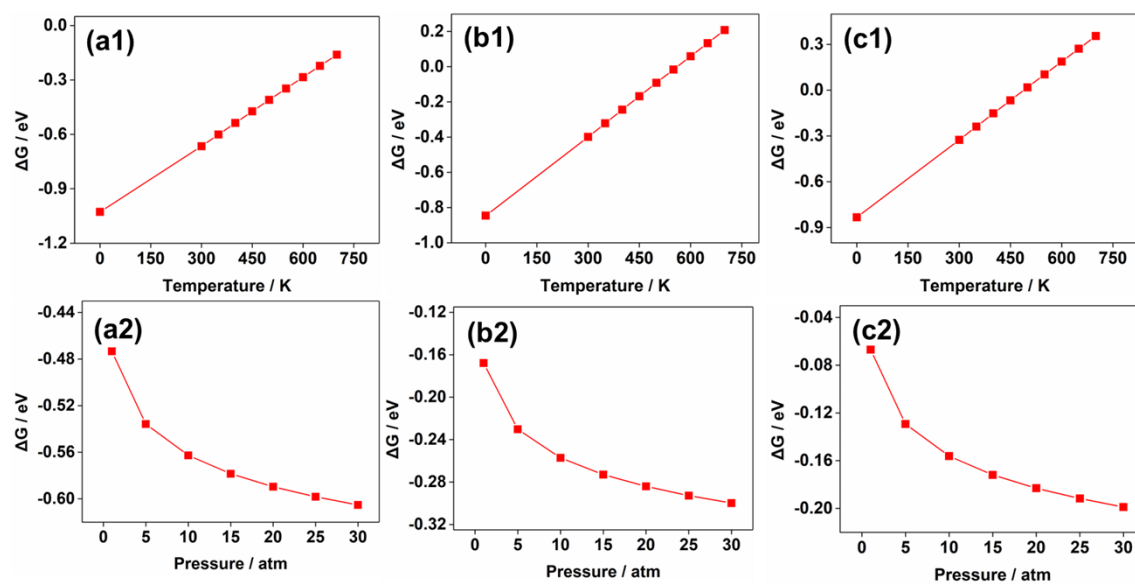

**Fig. S6.** Influence of **(a1-c1)** temperature (calculated at 1 atm) and **(a2-c2)** pressure (calculated at 450 K) on the reaction Gibbs free energy (thermal driving force). **(a)** ethene, **(b)** propylene, **(c)** 1-dodecene. The reaction Gibbs free energy was calculated according to Eq. (S1)<sup>1</sup> as follows and the reactants and products were all in gas phase.

$$\Delta G = G_{\text{ethylbenzene}(g)} - G_{\text{benzene}(g)} - G_{\text{ethene}(g)}$$

As can be seen, the reaction Gibbs free energy increases with temperature rising, indicating the decreased thermal driving force. As for pressure, the reaction Gibbs free energy decreases as pressure increases. However, the variation contributed by pressure is less than temperature, indicating temperature has a more significant effect on the activity.

(a) Stepwise

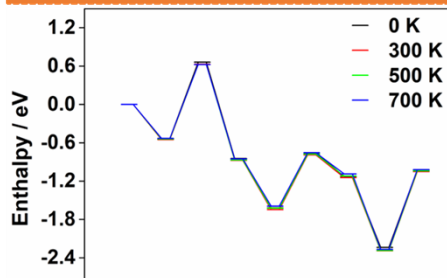

Concerted

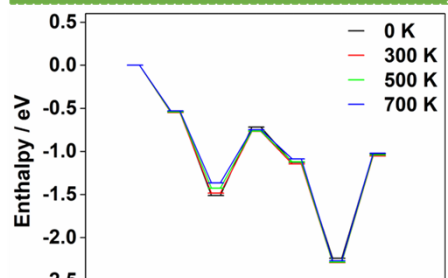

Reaction Coordinate

Reaction Coordinate

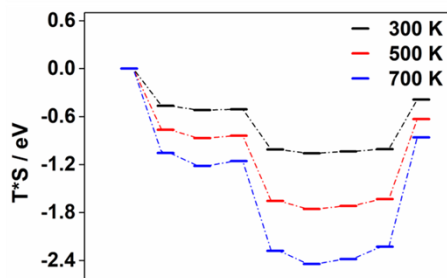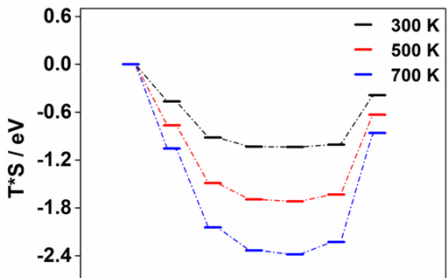

Reaction Coordinate

Reaction Coordinate

(b) Stepwise

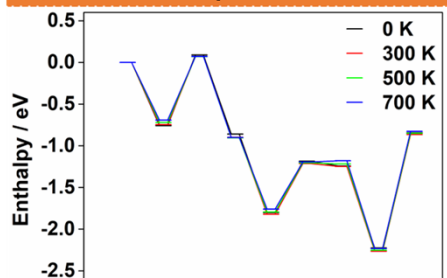

Concerted

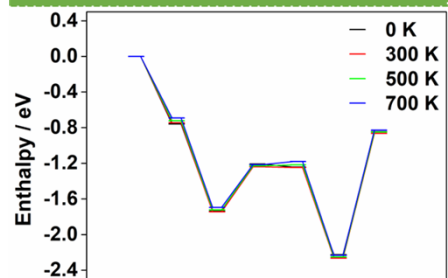

Reaction Coordinate

Reaction Coordinate

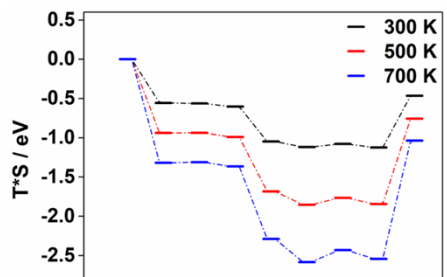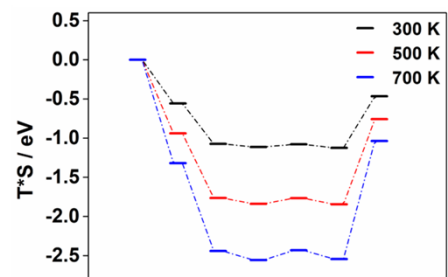

Reaction Coordinate

Reaction Coordinate



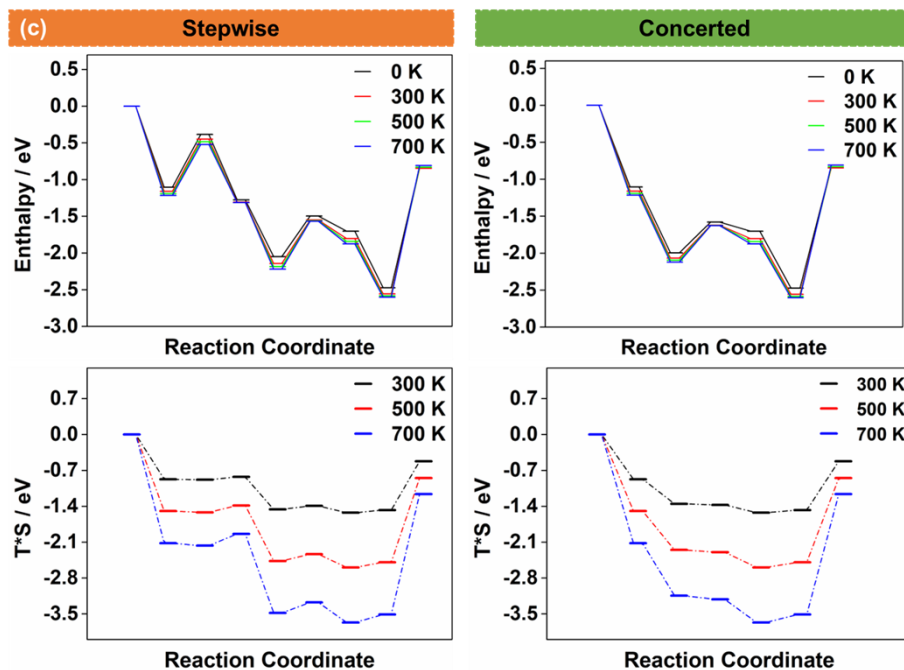

**Fig. S7.** The enthalpy part  $H$  (first row) and entropy part  $T^*S$  (second row) of the Gibbs free energy along the reaction coordinate for the alkylation of benzene with (a) ethene, (b) propylene and (c) 1-dodecene. Obviously, it's the entropy part that mainly accounts for the variation of reaction Gibbs free energy at different temperature.

The enthalpy part and entropy part were calculated along the reaction coordinate for these three olefins. As can be seen, the enthalpy diagrams show a similar trend as the Gibbs free energy diagrams (see Fig. 3 and Fig. S5) and a slight variation of enthalpy with different temperature is observed, indicating that the enthalpy part represents the intrinsic qualities of the reaction. However, the entropy part varies more largely with temperature variation as compared with enthalpy, indicating it's the entropy part that mainly accounts for the variation of reaction Gibbs free energy at different temperature, further the activity.

Regarding the alkylation of benzene with olefins in the present work, there is no release of water during the reaction process. Therefore, no obvious difference of the contribution from entropy

was observed between the stepwise and concerted mechanisms for all the three olefines. Additionally, it can also be observed that the difference among the three olefines is also limited. In fact, these limited differences are all attributed to the different interactions between intermediates and framework for the similar reaction process and identical number of reactants and products. Differently, for the MTO process, water can be released during the reaction process. For example, Brogaard et al <sup>2</sup> investigated the mechanism of the zeolite catalyzed methanol to hydrocarbon (MTH) between methanol and olefins theoretically and found that the stepwise pathway prevails at typical MTH reaction temperatures, mainly due to a higher entropy loss in the concerted as compared to the stepwise pathway. The entropy difference results from intermediate release of water in the stepwise pathway. Additionally, Wang et al <sup>1</sup> compared the alkylation of benzene with ethene and ethanol by DFT calculations, and found that the reaction Gibbs free energy  $\Delta G$  of the ethanol-involved reaction slightly decreased with temperature rising, which is different from the alkylation of benzene with ethene and the results in the present work (see Fig. S6 and S7). Such variation should be mainly attributed to the additional formation of H<sub>2</sub>O product in the ethanol process, considering that one obvious difference between the two processes lies in the intermediate release of water molecule (or not), which provides extra entropy gain for the whole reaction.

## **S1. Charge transfer analysis**

On the basis of the detailed reaction processes discussed above, a further study on the charge transfer was investigated through Bader charge analysis. Herein, the alkylation of benzene with ethene is taken as an example to illustrate the charge transfer along the reaction coordination.

### **S1.1. Stepwise mechanism**

Initially, the charge enriched ethene is adsorbed around the acidic proton with the charge transferred from ethene to zeolite (see Fig. S8a). As the reaction proceeds, the proton is detached from the framework and is bonded with C1 atom of ethene forming the ethoxy group, through which the charge of ethene further decreases and the charge of the acidic proton and framework increases concurrently. Subsequently, benzene is adsorbed near the ethoxy group leading to the charge further transferred from hydrocarbon to zeolite. Then, C2-O bond is broken and C2 atom is approaching C3 atom. As the distance of C2 and C3 reduces to covalent bond forming the protonated ethylbenzene, the charge of hydrocarbon further decreases. Due to the instability of H2 atom of benzene, it detaches and approaches the O atom originally bonded with the acidic proton to form the BAS and ethylbenzene eventually. The charge of hydrocarbon increases in this step. As the ethylbenzene desorbs, the charge of the framework restores to the original state.

### **S1.2. Concerted mechanism**

As for the concerted pathway, co-adsorption of benzene and ethene provides more charge for zeolite compared with the stepwise pathway. As the reaction proceeds, O-H bond is broken and the distance of C2 and C3 decreases, through which the charge of hydrocarbon decreases sharply. Subsequently, the charge of hydrocarbon decreases further as C2 is covalent bonded with C3. Finally, H2 is detached and back to the framework, from this process, the charge of hydrocarbon increases to a large extent. The overall charge transfer information is shown in Fig. S8b.

It's worth noting that the charge of hydrocarbon increases slightly when forming the ethoxy group in the stepwise mechanism. This can be explained as follows. Ethene is transformed into the protonated form after bonded with the acidic proton. As the protonated ethene (positively charged)

approaches the negative framework, electron will be attracted from the framework to ethene thus increasing its charge. It's worth noting that there is only ethene as the reactant in the channels before the introduction of benzene. Assuming benzene is not involved in the reaction, next step after the formation of the ethoxy group is the breaking of C2-O bond and then the H1 atom will be back to the framework again completing the reaction route (see Fig. S8c, S2-TS'-M7). In fact, this reaction without benzene involved always occurs at higher olefin concentration. And polymerization of olefin dominates in this case. This process is considered to be carbonium ions reaction mechanism of ethene itself<sup>3</sup>. However, if benzene is introduced after the formation of ethoxy group, next step is the breaking of C2-O bond and the electrophilic attacking of benzene. Therefore, it can be proposed that the overall stepwise pathway of benzene alkylation with ethene can be regarded as a coupling of two reaction routes with or without benzene involved (see Fig. S8c). Similar conclusions could also be reached for the alkylation of benzene with propylene and 1-dodecene.

The charge transfer results for the alkylation of benzene with propylene and 1-dodecene are shown in Fig. S9 and S10. Overall, the zeolite acts as a charge acceptor firstly and then turns to be a donor along the reaction coordinate. It's worth noting that the charge variations of both the acidic proton and framework are comparable, indicating charge transfer between hydrocarbon and zeolite mainly occurs via the acidic proton of the framework.

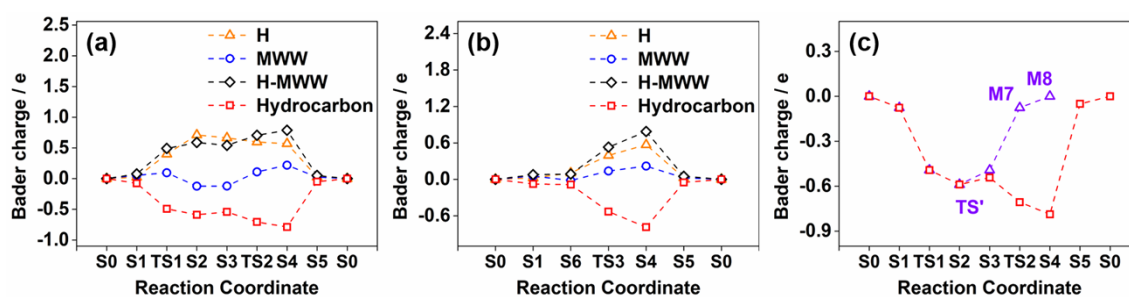

**Fig. S8.** Charge transfer information along the reaction coordinate for the alkylation of benzene

with ethene, including the (a) stepwise mechanism, (b) concerted mechanism, and (c) comparison of the reaction coordinate with or without benzene involved, of which TS', M7, and M8 correspond to the deprotonation transition state, adsorbed and desorbed ethene, respectively.

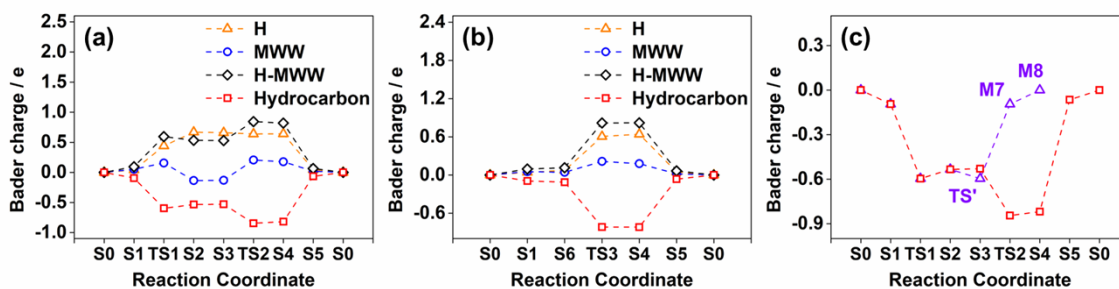

**Fig. S9.** Charge transfer information along the reaction coordinate for the alkylation of benzene with propylene, including the (a) stepwise mechanism, (b) concerted mechanism, and (c) comparison of the reaction coordinate with or without benzene involved, of which TS', M7, and M8 correspond to the deprotonation transition state, adsorbed and desorbed propylene, respectively.

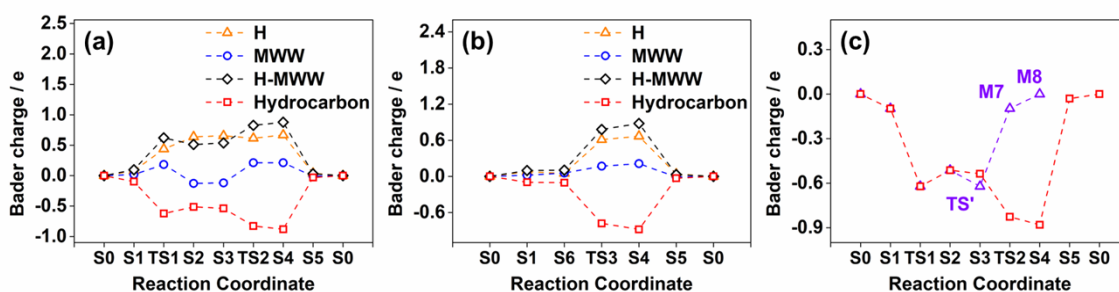

**Fig. S10.** Charge transfer information along the reaction coordinate for the alkylation of benzene with 1-dodecene, including the (a) stepwise mechanism, (b) concerted mechanism, and (c) comparison of the reaction coordinate with or without benzene involved, of which TS', M7, and M8 correspond to the deprotonation transition state, adsorbed and desorbed 1-dodecene, respectively.

## S2. Discussion of the alkoxy formation

After the adsorption of olefins, four different oxygen sites adjacent to Al are all possible to

form the alkoxy. The distance from C2 atom of olefins to these four oxygen atoms possible forming the alkoxy are shown in Table S1 and Fig. S11. It's reasonable to assume that the protonated olefins prefer to bond with the nearest oxygen. Therefore, the oxygen with the shortest C2-O distance was chosen in the present work to form the alkoxy.

**Table S1.** The distance from C2 atom to the four oxygen atoms possible forming the alkoxy (Å).

|       | Ethene | Propylene | 1-Dodecene |
|-------|--------|-----------|------------|
| C2-O1 | 3.00   | 3.09      | 2.97       |
| C2-O2 | 3.70   | 3.89      | 3.44       |
| C2-O3 | 4.56   | 5.35      | 4.68       |
| C2-O4 | 5.50   | 5.46      | 5.33       |

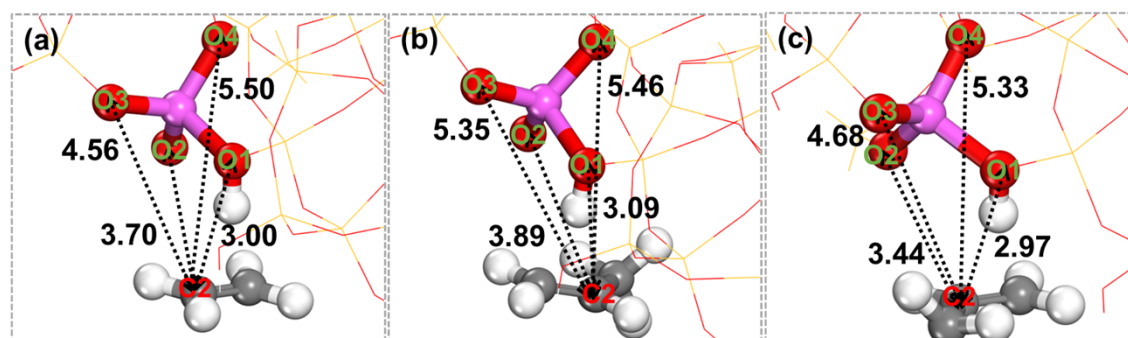

**Fig. S11.** Comparison of the distance from C2 atom to the four oxygen atoms possible forming the alkoxy over (a) ethene, (b) propylene, (c) 1-dodecene (Å).

### S3. Determination of TDTS and TDI

Herein, we take the Gibbs free energy diagrams shown in Fig. S5 as an example to illustrate this process.

For the stepwise mechanism (Fig. S5a), the energy of TS1 is higher than TS2, therefore, TS1 is determined as the TOF-determining transition state (TDTS). Then, two intermediates may be



determined as the TOF-determining intermediate (TDI) depending on its location relative to TS1. If the TDI appears before TS1, the S0 state will be determined as the TDI and the energetic span ( $\delta E$ ) can be calculated according Eq. (3a). However, if the TDI appears after TS1, the S5 state will be determined as the TDI and the energetic span ( $\delta E$ ) can be calculated according Eq. (3b). The results of these two cases are shown in Table S2a. Therefore, for the maximization the energetic span ( $\delta E$ ), TS1 and S5 are determined as TDTS and TDI, respectively.

For the concerted mechanism, only one transition state appears in the catalytic cycle, therefore, TS3 is determined as the TDTS directly. Then, two intermediates may be determined as the TOF-determining intermediate (TDI) depending on its location relative to TS3. If the TDI appears before the TS3, the S6 state will be determined as the TDI and the energetic span ( $\delta E$ ) can be calculated according Eq. (3a). However, if the TDI appears after TS3, the S5 state will be determined as the TDI and the energetic span ( $\delta E$ ) can be calculated according Eq. (3b). The results of these two cases are shown in Table S2b. Therefore, for the maximization the energetic span ( $\delta E$ ), TS3 and S5 are determined as TDTS and TDI, respectively.

**Table S2.** Relative Gibbs free energies (referred to S0 state) of the intermediates along the reaction coordinate (eV).

**(a) Stepwise**

| S0   | S1   | TS1  | S2    | S3    | TS2  | S4   | S5    | S0    | $\delta E$ |          |
|------|------|------|-------|-------|------|------|-------|-------|------------|----------|
|      |      |      |       |       |      |      |       |       | Eq. (3a)   | Eq. (3b) |
| 0.00 | 0.15 | 1.41 | -0.12 | -0.13 | 0.80 | 0.42 | -0.81 | -0.47 | 1.41       | 1.74     |

**(b) Concerted**

| S0   | S1   | S6    | TS3  | S4   | S5    | S0    | $\delta E$ |          |
|------|------|-------|------|------|-------|-------|------------|----------|
|      |      |       |      |      |       |       | Eq. (3a)   | Eq. (3b) |
| 0.00 | 0.15 | -0.09 | 0.76 | 0.42 | -0.81 | -0.47 | 0.86       | 1.10     |

**S3a. Effect of temperature**

The Gibbs free energy diagrams and the TDTS and TDI under different temperature are as follows. The TDTS and TDI were determined according to Eq. (3) in the main text. The Gibbs free energies of gaseous molecular are calculated at 1 atm.

### (1) Ethene

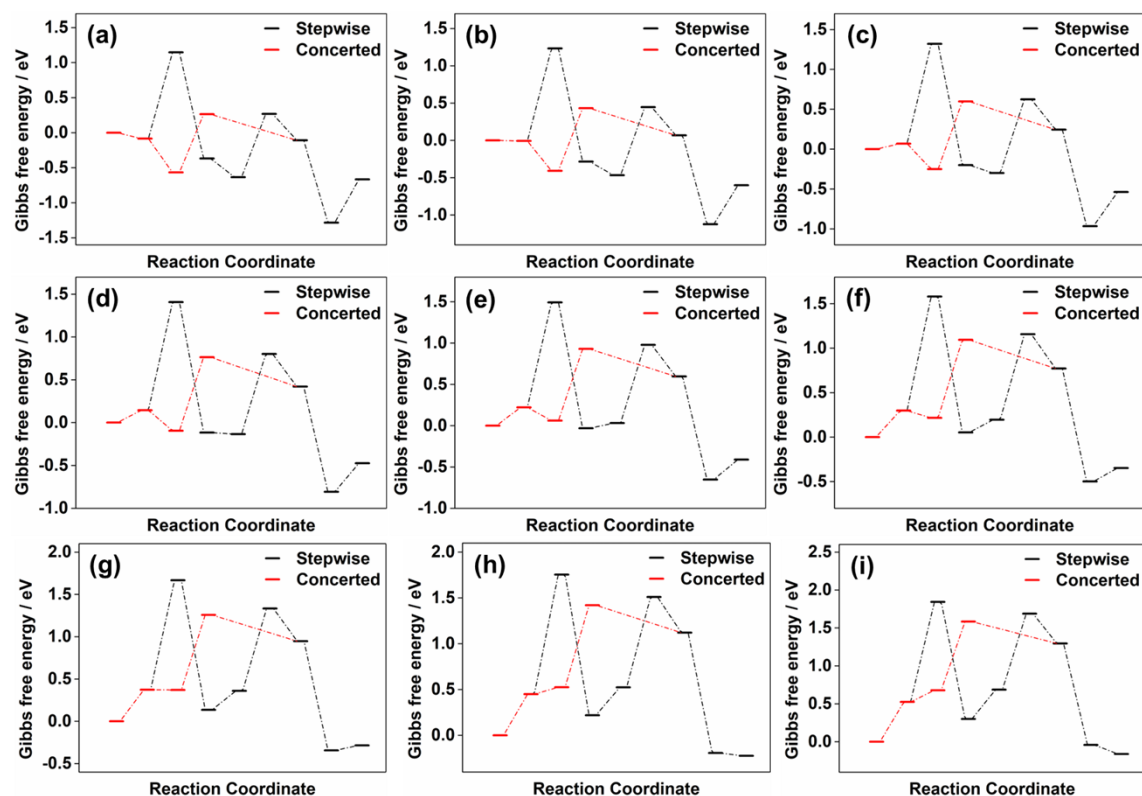

**Fig. S12.** Gibbs free energy diagrams of the complete reaction coordinate for the alkylation of benzene with ethene at different temperature. **(a)** 300 K, **(b)** 350 K, **(c)** 400 K, **(d)** 450 K, **(e)** 500 K, **(f)** 550 K, **(g)** 600 K, **(h)** 650 K, **(i)** 700 K. The cycle consists of the stepwise and concerted mechanisms.

**Table S3.** The TDTS and TDI of the ethene reaction cycle including **(a)** stepwise and **(b)** concerted mechanisms.

#### (a) Stepwise

|               |   |     |     |     |     |     |     |     |     |     |
|---------------|---|-----|-----|-----|-----|-----|-----|-----|-----|-----|
| Temperature / |   |     |     |     |     |     |     |     |     |     |
| K             | 0 | 300 | 350 | 400 | 450 | 500 | 550 | 600 | 650 | 700 |

|     |     |     |     |     |     |     |     |     |     |     |
|-----|-----|-----|-----|-----|-----|-----|-----|-----|-----|-----|
| TDS | TS1 |
| TDI | S5  | S0  | S0  |

**(b) Concerted**

|                    |     |     |     |     |     |     |     |     |     |     |
|--------------------|-----|-----|-----|-----|-----|-----|-----|-----|-----|-----|
| Temperature /<br>K | 0   | 300 | 350 | 400 | 450 | 500 | 550 | 600 | 650 | 700 |
| TDS                | TS3 |
| TDI                | S6  | S5  | S0  | S0  |

**(2) Propylene**

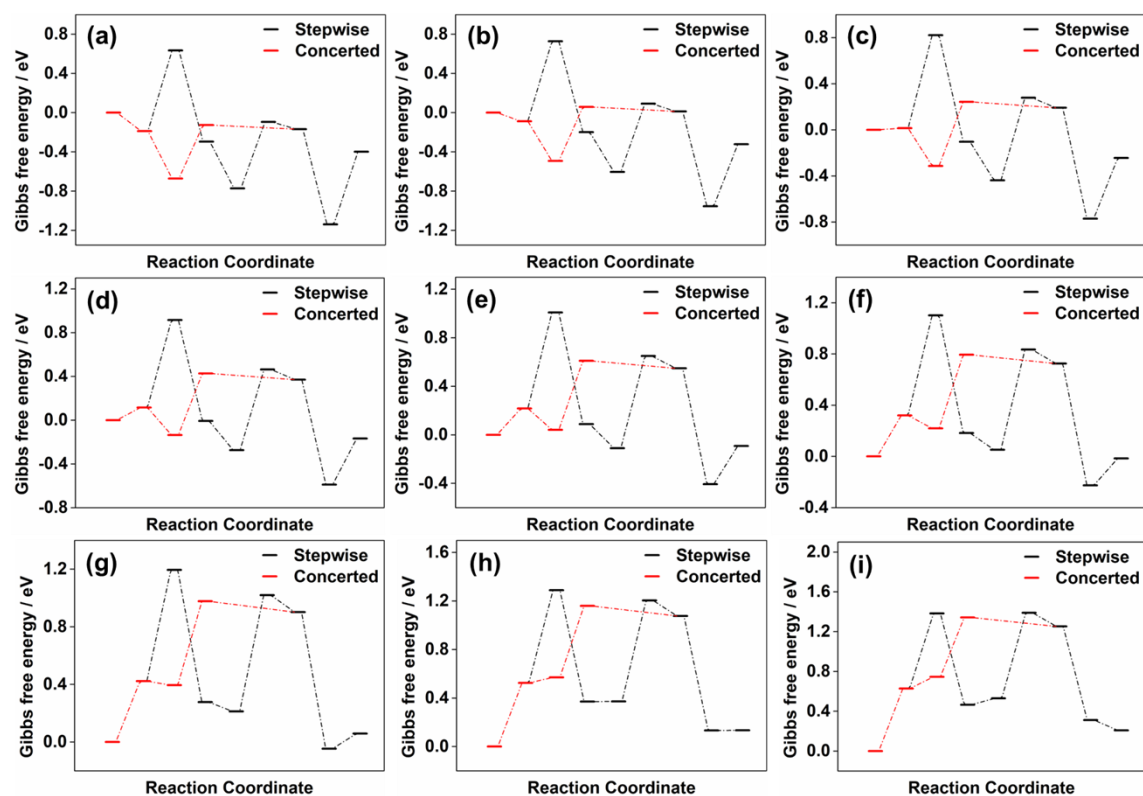

**Fig. S13.** Gibbs free energy diagrams of the complete reaction coordinate for the alkylation of benzene with propylene at different temperature. **(a)** 300 K, **(b)** 350 K, **(c)** 400 K, **(d)** 450 K, **(e)** 500 K, **(f)** 550 K, **(g)** 600 K, **(h)** 650 K, **(i)** 700 K. The cycle consists of the stepwise and concerted mechanisms.

**Table S4.** The TDTS and TDI of the propylene reaction cycle including (a) stepwise and (b) concerted mechanisms.

**(a) Stepwise**

|                    |     |     |     |     |     |     |     |     |     |     |
|--------------------|-----|-----|-----|-----|-----|-----|-----|-----|-----|-----|
| Temperature /<br>K | 0   | 300 | 350 | 400 | 450 | 500 | 550 | 600 | 650 | 700 |
| TDTS               | TS1 |
| TDI                | S5  | S0  |

**(b) Concerted**

|                    |     |     |     |     |     |     |     |     |     |     |
|--------------------|-----|-----|-----|-----|-----|-----|-----|-----|-----|-----|
| Temperature /<br>K | 0   | 300 | 350 | 400 | 450 | 500 | 550 | 600 | 650 | 700 |
| TDTS               | TS3 |
| TDI                | S6  | S5  | S0  |

**(3) 1-Dodecene**

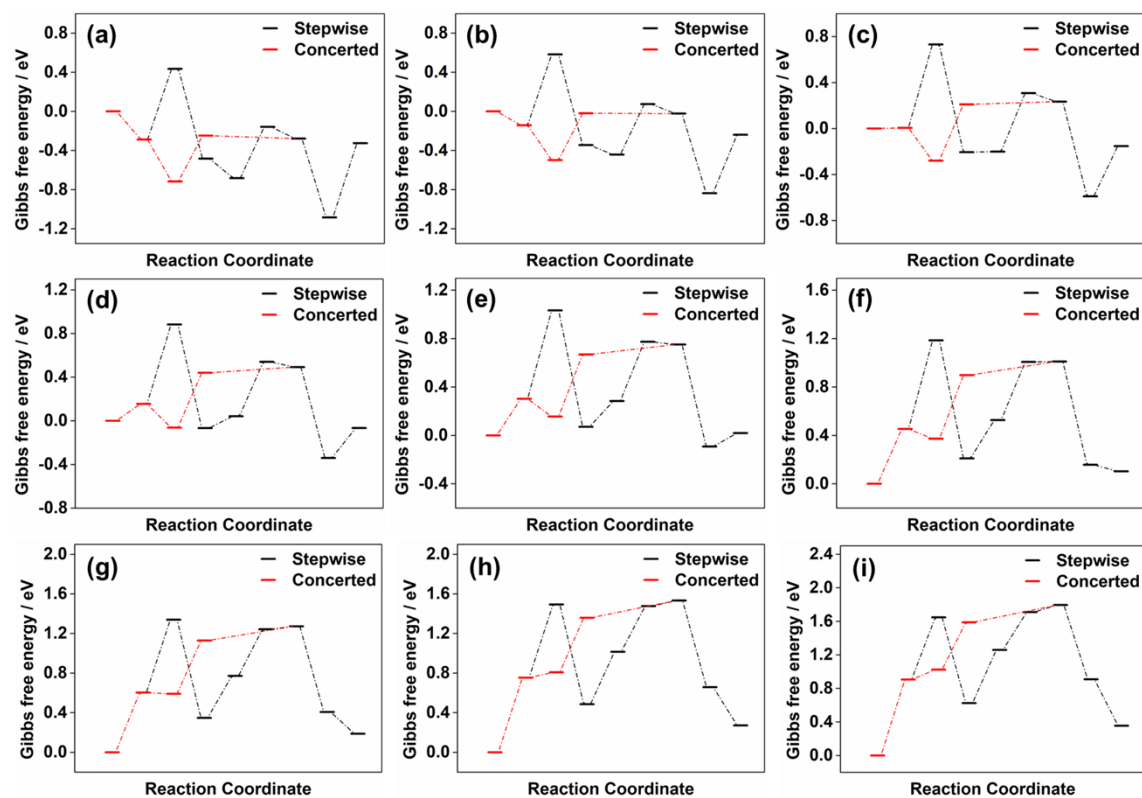

**Fig. S14.** Gibbs free energy diagrams of the complete reaction coordinate for the alkylation of benzene with 1-dodecene at different temperature. **(a)** 300 K, **(b)** 350 K, **(c)** 400 K, **(d)** 450 K, **(e)** 500 K, **(f)** 550 K, **(g)** 600 K, **(h)** 650 K, **(i)** 700 K. The cycle consists of the stepwise and concerted mechanisms.

**Table S5.** The TDTS and TDI of the 1-dodecene reaction cycle including **(a)** stepwise and **(b)** concerted mechanisms.

**(a) Stepwise**

|                    |     |     |     |     |     |     |     |     |     |     |
|--------------------|-----|-----|-----|-----|-----|-----|-----|-----|-----|-----|
| Temperature /<br>K | 0   | 300 | 350 | 400 | 450 | 500 | 550 | 600 | 650 | 700 |
| TDTS               | TS1 | TS2 |
| TDI                | S5  | S5  | S5  | S5  | S5  | S5  | S0  | S0  | S0  | S0  |

**(b) Concerted**

|                    |     |     |     |     |     |     |     |     |     |     |
|--------------------|-----|-----|-----|-----|-----|-----|-----|-----|-----|-----|
| Temperature /<br>K | 0   | 300 | 350 | 400 | 450 | 500 | 550 | 600 | 650 | 700 |
| TDTS               | TS3 |
| TDI                | S6  | S5  | S5  | S5  | S5  | S5  | S0  | S0  | S0  | S0  |

**S3b. Effect of pressure**

The Gibbs free energy diagrams and the TDTS and TDI under different pressure at 450 K are as follows. The TDTS and TDI were determined according to Eq. (3) in the main text.

**(1) Ethene**

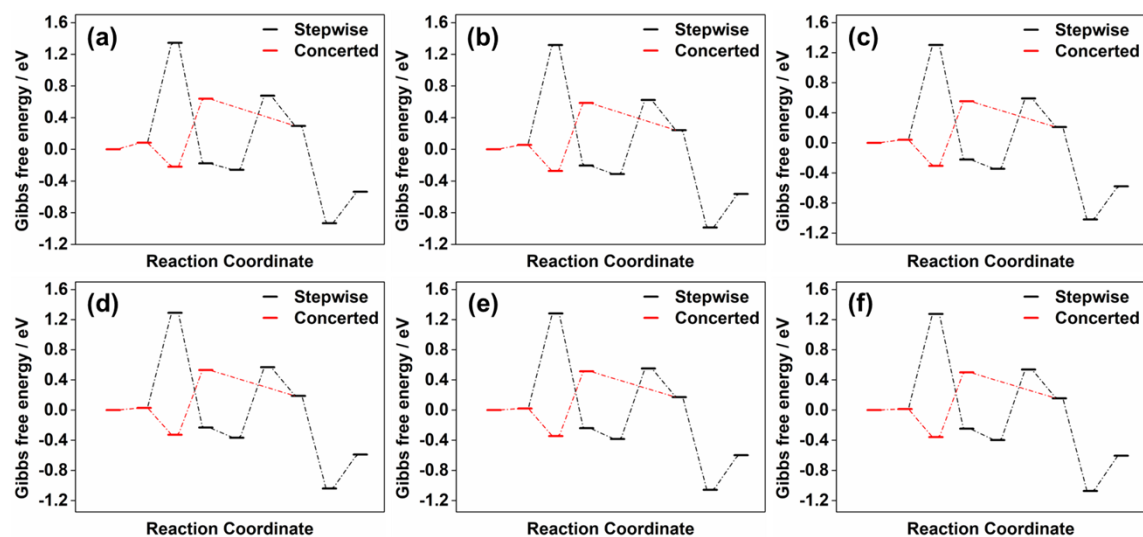

**Fig. S15.** Gibbs free energy diagrams of the complete reaction coordinate for the alkylation of benzene with ethene at different pressure. **(a)** 5 atm, **(b)** 10 atm, **(c)** 15 atm, **(d)** 20 atm, **(e)** 25 atm, **(f)** 30 atm. The cycle consists of the stepwise and concerted mechanisms.

**Table S6.** The TDTS and TDI of the ethene reaction cycle including **(a)** stepwise and **(b)** concerted mechanisms.

**(a) Stepwise**

| Pressure / atm | 5   | 10  | 15  | 20  | 25  | 30  |
|----------------|-----|-----|-----|-----|-----|-----|
| TDTS           | TS1 | TS1 | TS1 | TS1 | TS1 | TS1 |
| TDI            | S5  | S5  | S5  | S5  | S5  | S5  |

**(b) Concerted**

| Pressure / atm | 5   | 10  | 15  | 20  | 25  | 30  |
|----------------|-----|-----|-----|-----|-----|-----|
| TDTS           | TS3 | TS3 | TS3 | TS3 | TS3 | TS3 |
| TDI            | S5  | S5  | S5  | S5  | S5  | S5  |

**(2) Propylene**



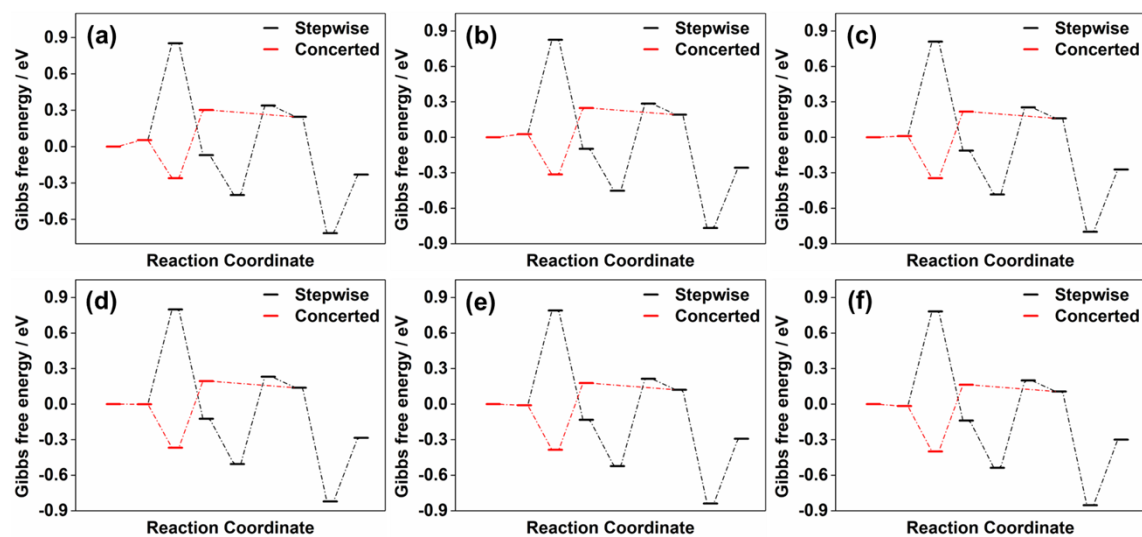

**Fig. S16.** Gibbs free energy diagrams of the complete reaction coordinate for the alkylation of benzene with propylene at different pressure. **(a)** 5 atm, **(b)** 10 atm, **(c)** 15 atm, **(d)** 20 atm, **(e)** 25 atm, **(f)** 30 atm. The cycle consists of the stepwise and concerted mechanisms.

**Table S7.** The TDTS and TDI of the propylene reaction cycle including **(a)** stepwise and **(b)** concerted mechanisms.

**(a) Stepwise**

| Pressure / atm | 5   | 10  | 15  | 20  | 25  | 30  |
|----------------|-----|-----|-----|-----|-----|-----|
| TDTS           | TS1 | TS1 | TS1 | TS1 | TS1 | TS1 |
| TDI            | S5  | S5  | S5  | S5  | S5  | S5  |

**(b) Concerted**

| Pressure / atm | 5   | 10  | 15  | 20  | 25  | 30  |
|----------------|-----|-----|-----|-----|-----|-----|
| TDTS           | TS3 | TS3 | TS3 | TS3 | TS3 | TS3 |
| TDI            | S5  | S5  | S5  | S5  | S5  | S5  |

**(3) 1-Dodecene**

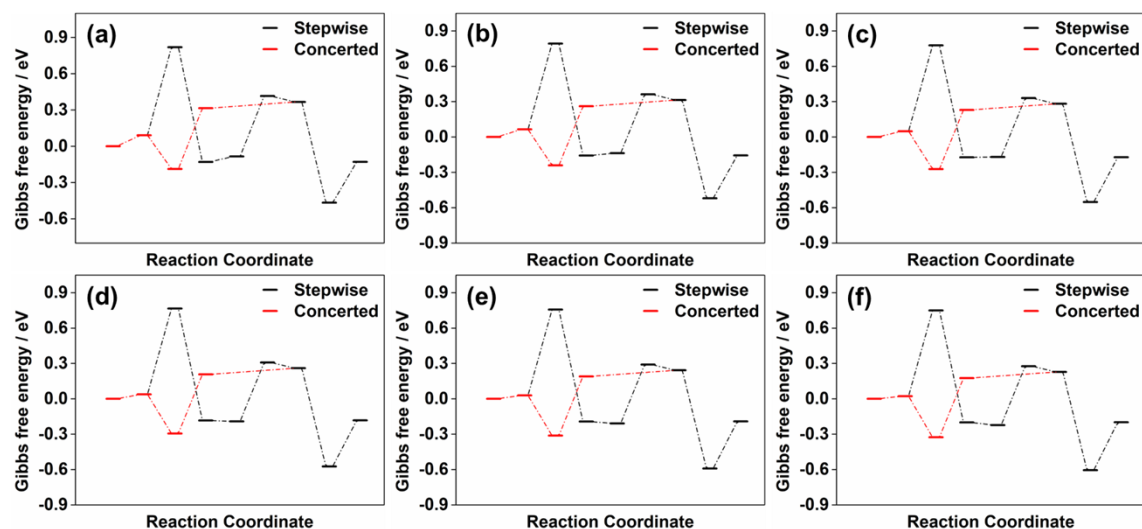

**Fig. S17.** Gibbs free energy diagrams of the complete reaction coordinate for the alkylation of benzene with 1-dodecene at different pressure. **(a)** 5 atm, **(b)** 10 atm, **(c)** 15 atm, **(d)** 20 atm, **(e)** 25 atm, **(f)** 30 atm. The cycle consists of the stepwise and concerted mechanisms.

**Table S8.** The TDTS and TDI of the 1-dodecene reaction cycle including **(a)** stepwise and **(b)** concerted mechanisms.

**(a) Stepwise**

| Pressure / atm | 5   | 10  | 15  | 20  | 25  | 30  |
|----------------|-----|-----|-----|-----|-----|-----|
| TDTS           | TS1 | TS1 | TS1 | TS1 | TS1 | TS1 |
| TDI            | S5  | S5  | S5  | S5  | S5  | S5  |

**(b) Concerted**

| Pressure / atm | 5   | 10  | 15  | 20  | 25  | 30  |
|----------------|-----|-----|-----|-----|-----|-----|
| TDTS           | TS3 | TS3 | TS3 | TS3 | TS3 | TS3 |
| TDI            | S5  | S5  | S5  | S5  | S5  | S5  |

**Table S9.** Imaginary frequencies for all transition states.

| Reactants  | TS1     | TS2     | TS3     |
|------------|---------|---------|---------|
| Ethene     | 686.61i | 187.76i | 164.80i |
| Propylene  | 377.23i | 134.52i | 108.87i |
| 1-dodecene | 207.28i | 112.10i | 113.46i |

**Table S10.** Absolute energy of all the optimized intermediates for the alkylation of benzene with ethene.

| Intermediate | H-MWW    | Adsorbed ethene | TS1      | Ethoxy   | Co-adsorption of ethoxy and benzene | TS2      |
|--------------|----------|-----------------|----------|----------|-------------------------------------|----------|
| Energy / eV  | -1752.72 | -1785.26        | -1783.99 | -1785.69 | -1862.52                            | -1861.56 |

  

| Intermediate | Protonated ethylbenzene adsorption | Adsorbed ethylbenzene | Co-adsorption of ethene and benzene | TS3      | Benzene | Ethene | Ethylbenzene |
|--------------|------------------------------------|-----------------------|-------------------------------------|----------|---------|--------|--------------|
| Energy / eV  | -1861.98                           | -1863.13              | -1862.29                            | -1861.46 | -76.03  | -31.97 | -109.16      |

**Table S11.** Absolute energy of all the optimized intermediates for the alkylation of benzene with propylene.

| Intermediate | H-MWW    | Adsorbed propylene | TS1      | Isopropoxy | Co-adsorption of isopropoxy and benzene | TS2      |
|--------------|----------|--------------------|----------|------------|-----------------------------------------|----------|
| Energy / eV  | -1752.72 | -1802.17           | -1801.25 | -1802.38   | -1879.37                                | -1878.65 |

  

| Intermediate | Protonated cumene adsorption | Adsorbed cumene | Co-adsorption of propylene and benzene | TS3      | Benzene | Propylene | Cumene  |
|--------------|------------------------------|-----------------|----------------------------------------|----------|---------|-----------|---------|
| Energy / eV  | -1878.79                     | -1879.79        | -1879.22                               | -1878.67 | -76.03  | -48.67    | -125.67 |

**Table S12.** Absolute energy of all the optimized intermediates for the alkylation of benzene with 1-dodecene.

| Intermediate | H-MWW    | Adsorbed 1-dodecene | TS1      | Dodecoxy  | Co-adsorption of dodecoxy and benzene | TS2      |
|--------------|----------|---------------------|----------|-----------|---------------------------------------|----------|
| Energy / eV  | -1752.72 | -1951.23            | -1950.46 | -1951.495 | -2028.32                              | -2027.68 |

  

| Intermediate | Protonated dodecylbenzene adsorption | Adsorbed dodecylbenzene | Co-adsorption of 1-dodecene | TS3 | Benzene | 1-dodecene | Dodecylbenzene |
|--------------|--------------------------------------|-------------------------|-----------------------------|-----|---------|------------|----------------|
|--------------|--------------------------------------|-------------------------|-----------------------------|-----|---------|------------|----------------|

| and      |          |          |          |         |        |         |         |
|----------|----------|----------|----------|---------|--------|---------|---------|
| benzene  |          |          |          |         |        |         |         |
| Energy / | -2027.72 | -2028.75 | -2028.18 | -       | -76.03 | -197.37 | -274.35 |
| eV       |          |          |          | 2027.71 |        |         |         |

**Table S13.** Cartesian coordinates of all the optimized intermediates for the alkylation of benzene with ethene.

| H-MWW               |                     |                     |     |
|---------------------|---------------------|---------------------|-----|
| 7.0511269792453612  | 4.2430713042060493  | 0.9107988091997012  | O1  |
| -0.0027996337905734 | 8.3426425484340481  | 0.9252122950255126  | O2  |
| 5.7888269944769721  | 3.5776009877477821  | 3.0884051843247020  | O3  |
| 1.2991199778209204  | 9.1868943119309137  | 24.0278942579153565 | O4  |
| 8.4646824791010360  | 3.4439686457529373  | 3.0548313198835553  | O5  |
| -1.3482840956980606 | 9.2895692100277074  | 24.0480410264238849 | O6  |
| 7.2577464218965551  | 5.8153550215405581  | 3.0869956075548957  | O7  |
| -0.0943833929769413 | 6.9103824998967838  | 24.0080999086065781 | O8  |
| 1.1951135105584259  | 9.3664496222266180  | 3.1119529959325356  | O9  |
| 5.9387892934369138  | 3.2004366241409272  | 24.0056691458721190 | O10 |
| -1.4473140520347831 | 9.0741422681952049  | 3.0742975355310551  | O11 |
| 8.5685808243701853  | 3.6510988910626723  | 24.0659956927381273 | O12 |
| 0.1348299629007714  | 6.9107885955026669  | 3.0965446804080865  | O13 |
| 6.8348505790340273  | 5.6965556075253430  | 24.1876117440305620 | O14 |
| 4.9518433211989930  | 1.3993879014452668  | 4.3707260591735633  | O15 |
| 2.0398026889373453  | 11.3939295802954792 | 22.7206845364311505 | O16 |
| 10.7776714524489989 | 3.7768814902915748  | 4.3351313438322601  | O17 |
| -3.6364848066561182 | 8.9502756311314293  | 22.7310256285147503 | O18 |
| 5.7896108994655053  | 7.6296269120796367  | 4.3876639777474091  | O19 |
| 1.4010407628921842  | 5.1538237790978769  | 22.6971959243988017 | O20 |
| 2.3723871500796392  | 11.2958808712965677 | 4.5100927278024354  | O21 |
| 4.5838794518099055  | 1.4122909061267281  | 22.5913593156697665 | O22 |
| -3.7262774458285270 | 9.0897785102433506  | 4.4544371965743492  | O23 |
| 10.8530690885326351 | 3.6530866411738505  | 22.6979496188574323 | O24 |
| 1.2244399561850781  | 4.9235394847462581  | 4.4966965118455251  | O25 |
| 5.8488264480217076  | 7.9986913198091241  | 22.7362092872884602 | O26 |
| -1.2361346374276778 | 4.9077274937836890  | 22.6583013046153283 | O27 |
| 8.4230858949799021  | 7.7753945902719508  | 4.4533638977395436  | O28 |
| -2.4608677591822872 | 11.2911773799535524 | 22.7019824119207208 | O29 |
| 9.5630431327373326  | 1.4338863826731241  | 4.4189280487224414  | O30 |
| 3.5745314676184039  | 9.2547292279997500  | 22.6668190208976732 | O31 |
| 3.5143324019003903  | 3.6096381579454517  | 4.4727554568534140  | O32 |
| 8.5923662344872085  | 7.5642871636349920  | 22.7969136120844773 | O33 |
| -1.4056736030334940 | 5.1189160548663635  | 4.3153589463837960  | O34 |
| 9.3184801467181586  | 1.5104872536676943  | 22.6776857862904571 | O35 |
| -2.2529394133653664 | 11.2811590289891086 | 4.3285965400513486  | O36 |

---

|                     |                     |                     |     |
|---------------------|---------------------|---------------------|-----|
| 3.7106316852011476  | 3.9057847820257665  | 22.7312305450296748 | O37 |
| 3.5060470385455584  | 8.9165344757427327  | 4.3700790921008652  | O38 |
| 5.8456408956990904  | 3.4919461581195006  | 5.7599227874270138  | O39 |
| 1.2986797530658452  | 9.2056962642667379  | 21.3411078786141921 | O40 |
| 8.5219338562586380  | 3.5059661347363744  | 5.7282134399245610  | O41 |
| -1.3642874091636870 | 9.2599764476294038  | 21.3698732932529616 | O42 |
| 7.1711256087837238  | 5.8150349463022062  | 5.7612424949871208  | O43 |
| -0.0696281848468345 | 6.9110565690846837  | 21.3352890385557181 | O44 |
| 1.2659716881167160  | 9.2311850877355486  | 5.7847095367338062  | O45 |
| 5.9106489821775083  | 3.2875441631129174  | 21.3088216453493260 | O46 |
| -1.4069023868244446 | 9.1868820402701221  | 5.7490105488571501  | O47 |
| 8.5448218228771751  | 3.7279872342524460  | 21.3822104728365261 | O48 |
| -0.0328151900038778 | 6.8936054746552671  | 5.7659636220027499  | O49 |
| 6.8260106048718274  | 5.7907026298422073  | 21.2973224468939826 | O50 |
| 7.2128367772246200  | 4.2521720178877169  | 7.8775710074469290  | O51 |
| -0.0671184299462055 | 8.4674242689395047  | 19.2124429732934026 | O52 |
| -0.0959404243819684 | 8.4367062639433321  | 7.8992185477363721  | O53 |
| 7.1802178263826253  | 4.1958902268691878  | 19.1863661017711138 | O54 |
| 5.5714264451625111  | 0.0624742030037174  | 6.5843012083759076  | O55 |
| 8.6493008551163051  | 0.1681361747706613  | 20.4790174273661805 | O56 |
| -2.8234533875329948 | 4.9847437689681025  | 6.5610281869629956  | O57 |
| -4.4465832427367626 | 7.7153289825703357  | 20.5241454170514288 | O58 |
| 4.3457930392024284  | 7.7752151443190138  | 6.6203538431027553  | O59 |
| 2.8845885554832882  | 5.0838165223277958  | 20.4885616719551287 | O60 |
| 8.9063699331713657  | 0.1870172590646109  | 6.6697076846379995  | O61 |
| 5.3304457708123749  | 0.0291882804628962  | 20.4295225475323399 | O62 |
| -4.5316559510476537 | 7.8361077453670918  | 6.6601261361283424  | O63 |
| -2.7121873088858233 | 4.7785424509679766  | 20.4616901958239019 | O64 |
| 2.7056107872137072  | 4.8123602969817805  | 6.6992399057020364  | O65 |
| 4.4699542833745740  | 8.0635520460996997  | 20.4470121560431011 | O66 |
| 7.2707108881750271  | 0.0953565510570665  | 4.5627722919343388  | O67 |
| 6.9729612195875266  | 0.2385781135887961  | 22.5206496944778713 | O68 |
| -3.7186957451758804 | 6.4317456173969676  | 4.5416090675393130  | O69 |
| -3.4750028739110466 | 6.3114314787183572  | 22.5233973267510024 | O70 |
| 3.5168136240761250  | 6.2632154415693151  | 4.6142193646505296  | O71 |
| 3.6540810322088895  | 6.5611399881106252  | 22.5279696330947772 | O72 |
| 7.1970450204242313  | 0.1010195509736544  | 8.6979266182428301  | O73 |
| 7.0170569001645005  | 0.1447652889924168  | 18.3749581745869577 | O74 |
| -3.6330150392304348 | 6.3778638096983507  | 8.6861904331288180  | O75 |
| -3.5410551753128767 | 6.2952682049945379  | 18.4430164727616699 | O76 |
| 3.5617373818154636  | 6.3160839620981752  | 8.7134091841684036  | O77 |
| 3.6287038920256380  | 6.5642691625415370  | 18.4140861668178175 | O78 |
| 4.7871744536014322  | 1.2598398410511162  | 8.7788388164366875  | O79 |
| 2.1659952099609363  | 11.4180416434979879 | 18.3106802525546186 | O80 |

---

---

|                     |                     |                     |      |
|---------------------|---------------------|---------------------|------|
| 10.9411490260350064 | 3.7017158008912565  | 8.7358113530407469  | O81  |
| -3.6682161692663238 | 8.9532133152116700  | 18.3582097022186908 | O82  |
| 5.7779715510055425  | 7.8103645671969923  | 8.8116648440143646  | O83  |
| 1.3868281144992225  | 5.1199767360123509  | 18.3469839509539447 | O84  |
| 2.3618513346881302  | 11.3927460786027357 | 8.8702787338563809  | O85  |
| 4.6779308899588745  | 1.4385535580967035  | 18.2863866621500257 | O86  |
| -3.8652002422412206 | 9.0402864083657537  | 8.9096481269174586  | O87  |
| 10.9280246545624671 | 3.6228264595353417  | 18.2262320540255196 | O88  |
| 1.3440678227125131  | 4.8354016928623063  | 8.9555416394549372  | O89  |
| 5.9258525336159318  | 7.9495649564406872  | 18.2598467940945355 | O90  |
| -1.2415074953321827 | 4.9490506239528411  | 18.2834860908842245 | O91  |
| 8.4047790962833808  | 7.5418431500123528  | 8.8130044607054057  | O92  |
| -2.5021125429724478 | 11.3105781257020190 | 18.1888630255863859 | O93  |
| 9.4493225062289259  | 1.5235639282111653  | 8.8718935110233623  | O94  |
| 3.6221639578353839  | 9.2299528599266143  | 18.2611870855231793 | O95  |
| 3.7018610394698075  | 3.6625705602787604  | 8.8527673101890230  | O96  |
| 8.5299814100982871  | 7.5195240747234617  | 18.3652797623902302 | O97  |
| -1.2669471531110603 | 5.1482652868195782  | 8.6602600166731847  | O98  |
| 9.2724151891311948  | 1.5704120993500492  | 18.3592851907329759 | O99  |
| -2.2383873042025080 | 11.1163593070362534 | 8.6783299115070243  | O100 |
| 3.7523521083252813  | 3.9066034857948604  | 18.3222968637431336 | O101 |
| 3.3950153750285921  | 8.9695976085690390  | 8.7483445130073285  | O102 |
| 6.0559698352450315  | 3.2313999239236941  | 10.0360295315322272 | O103 |
| 1.2556195061188777  | 9.2516247104291871  | 17.0450379709011095 | O104 |
| 8.6390367282575937  | 3.7646631443189364  | 10.0642562582373039 | O105 |
| -1.3757752353814996 | 9.2034143195484788  | 17.0167826105163371 | O106 |
| 6.8849468435510648  | 5.7360518514294041  | 10.0546662535272358 | O107 |
| -0.0173848388159934 | 6.9506260315594890  | 17.0233696967144645 | O108 |
| 1.1139485172781489  | 9.3777289294135144  | 10.0700655290805035 | O109 |
| 5.9755541513246984  | 3.3605434003797439  | 16.9695128565202715 | O110 |
| -1.4932077334696476 | 8.9916303514984168  | 10.0986191422472391 | O111 |
| 8.5883816119936540  | 3.7423945567499914  | 16.9745618703062391 | O112 |
| 0.1436830322121438  | 6.9245683359326069  | 10.0691046784719020 | O113 |
| 6.9484053706399482  | 5.8111601132816100  | 17.0672242145792588 | O114 |
| 3.9163851185047656  | 2.2071511269434358  | 11.0886688699864511 | O115 |
| 3.2126754119476386  | 10.6220638688462543 | 16.0204236067495600 | O116 |
| 10.6683349682473114 | 2.4698384416065688  | 11.0557408440395282 | O117 |
| -3.5648812177178768 | 10.1813994557443106 | 16.0191816287458835 | O118 |
| 7.1039586959485721  | 8.1123960883082376  | 11.0823087498259696 | O119 |
| 0.1959225381005023  | 4.5388080191340023  | 16.0643965886519595 | O120 |
| 3.3509437736975185  | 10.2512355972883569 | 11.0716574605486535 | O121 |
| 3.6585714230566380  | 2.5323393565865833  | 16.0711237625343557 | O122 |
| -3.3542579050065462 | 10.5866525617944696 | 11.0220067484853050 | O123 |
| 10.4472844215626601 | 2.1281120931330353  | 16.0616005164628390 | O124 |

---



---

|                     |                     |                     |      |
|---------------------|---------------------|---------------------|------|
| -0.2867131577032405 | 4.5438744880176740  | 11.0465076012345236 | O125 |
| 7.4165548432180319  | 8.1919203823766491  | 16.0614425308517177 | O126 |
| 2.3519958509628149  | 0.1488920403816746  | 11.7535816629850220 | O127 |
| 12.0502044372248278 | 0.1198354583473828  | 15.3311904928886999 | O128 |
| -1.2192258213883349 | 2.1774563219934535  | 11.8088721410699016 | O129 |
| -6.0925218315359446 | 10.5801348546124654 | 15.2953503990077451 | O130 |
| 5.9228249531465762  | 10.4238251704169631 | 11.6912544073206117 | O131 |
| 1.1293768437261360  | 2.1583402838261607  | 15.3193872195633567 | O132 |
| 11.6453762287868265 | 0.0934059421398786  | 11.6274092198988210 | O133 |
| 2.7808946635242577  | 0.1154540108336954  | 15.4874241738001981 | O134 |
| -5.8959403302427429 | 10.2386141220874709 | 11.6529306043714094 | O135 |
| -1.4620734317438653 | 2.5814856214915012  | 15.4642561725836565 | O136 |
| 1.3751229815934114  | 2.5852452201194565  | 11.6406352668404232 | O137 |
| 5.7541311820384093  | 10.1574167139015650 | 15.5000765141982662 | O138 |
| 3.1256448509483530  | 1.9489310955541559  | 13.5673794790203761 | O139 |
| 4.0388130068260599  | 10.7865242064931053 | 13.5484671140372850 | O140 |
| 11.2135106500830801 | 1.9139061300140687  | 13.5541786116054368 | O141 |
| -4.0923935929206046 | 10.8186607942978359 | 13.5347254753791262 | O142 |
| 7.1506246446021020  | 8.9548617359662686  | 13.5574095066393827 | O143 |
| -0.0319221818675888 | 3.8013893253189490  | 13.5594286819875389 | O144 |
| -0.0444121069718895 | 8.3254485417636808  | 26.1963011634219036 | O145 |
| 7.1947199292710771  | 3.9619085201942603  | 26.2535836691478330 | O146 |
| 5.0278440639190833  | 3.0205980421205090  | 4.4152652742753995  | Si1  |
| 2.0177576248655438  | 9.7788889764170168  | 22.6978703359576564 | Si2  |
| 9.3292043162026683  | 3.0424773537086574  | 4.3765158652364615  | Si3  |
| -2.2037519184185479 | 9.6891873679023313  | 22.7166932914151225 | Si4  |
| 7.1577444739926213  | 6.7552949338906156  | 4.4144394910349938  | Si5  |
| -0.0065248060929655 | 5.9692756884182883  | 22.6814945744713974 | Si6  |
| 2.0838961553226349  | 9.6970437902753375  | 4.4379813110004251  | Si7  |
| 5.0485074775570107  | 2.9758605451888096  | 22.6688243329608952 | Si8  |
| -2.2041228963712847 | 9.6587177991671282  | 4.3944018662958388  | Si9  |
| 9.3050961307821325  | 3.1404469276016842  | 22.7125762053289542 | Si10 |
| -0.0216655039716560 | 5.9637720141231227  | 4.4119761408519294  | Si11 |
| 4.6041178719068032  | 2.5987357121319539  | 9.6783950162217902  | Si12 |
| 2.5653075571518258  | 10.1295066822684454 | 17.4171631717728062 | Si13 |
| 9.9243467200923661  | 2.8509541255749911  | 9.6718025235940761  | Si14 |
| -2.7787174525948570 | 9.9177573663225083  | 17.4094700458532365 | Si15 |
| 7.0538235250572034  | 7.3080861112170785  | 9.6802571032602245  | Si16 |
| 0.0693025643963670  | 5.3840094953182680  | 17.4376204017001548 | Si17 |
| 2.5619748417102395  | 10.0006201137276776 | 9.6805848908417467  | Si18 |
| 4.5171136061421029  | 2.7996661602067774  | 17.4174104895054960 | Si19 |
| -2.7450445591840298 | 9.9365971076196367  | 9.6702926320944247  | Si20 |
| 9.8162352561524084  | 2.7687220760028373  | 17.4110164996998478 | Si21 |
| -0.0149953392119628 | 5.3576329486337722  | 9.6722135954722361  | Si22 |

---

---

|                     |                     |                     |      |
|---------------------|---------------------|---------------------|------|
| 7.2098712287177662  | 7.3687459416405749  | 17.4440952205068882 | Si23 |
| 2.6904604656999709  | 1.7163703283344909  | 12.0159626110130180 | Si24 |
| 4.4640169311471922  | 11.0531987899053039 | 15.0957206909167940 | Si25 |
| 11.6864560396917163 | 1.6657230277954282  | 12.0149419462781744 | Si26 |
| -4.5498378622796025 | 11.0491269534511893 | 15.0807430307157144 | Si27 |
| 7.1743631974188133  | 9.4369767244272893  | 12.0019349847405543 | Si28 |
| -0.0397740158429454 | 3.2672753744324639  | 15.0986506619841983 | Si29 |
| 4.4400633032306756  | 11.0139510011387944 | 11.9886555314131549 | Si30 |
| 2.6726854193614971  | 1.6887484898778913  | 15.1093581218471957 | Si31 |
| -4.5512791075293517 | 11.0724707158031368 | 11.9931638594060477 | Si32 |
| 11.6698895963157465 | 1.6859326809799886  | 15.1015119706997005 | Si33 |
| -0.0409882049773669 | 3.2760488239348229  | 12.0173707100232097 | Si34 |
| 7.1689341443256778  | 9.4701001715012918  | 15.1018587306647056 | Si35 |
| 5.6924719181102370  | 0.0845759384037610  | 4.9739857669609586  | Si36 |
| 8.5415250872517561  | 0.2187326588399282  | 22.0887382531594803 | Si37 |
| -2.9017488932038162 | 5.0802698591475393  | 4.9505034193799196  | Si38 |
| -4.3803052816414390 | 7.6216774812734842  | 22.1450985492295693 | Si39 |
| 4.2875083073380535  | 7.6430155541481337  | 5.0105419477673498  | Si40 |
| 2.9085826670793913  | 5.1546588427598357  | 22.0978766440865435 | Si41 |
| 8.8269270450968964  | 0.1281020340016939  | 5.0545967158888008  | Si42 |
| 5.4144960067381973  | 0.1227042133168886  | 22.0436374577337837 | Si43 |
| -4.4929058024928725 | 7.7789072847410150  | 5.0430223510550762  | Si44 |
| -2.7657183913691714 | 4.9180166776201846  | 22.0760645908460518 | Si45 |
| 2.7431846550499697  | 4.9064749024387426  | 5.0835067326487131  | Si46 |
| 4.2939719686884672  | 7.9508109612883837  | 22.0319300505114093 | Si47 |
| 5.6435747200134596  | 0.0131084580532875  | 8.1970920255152038  | Si48 |
| 8.5724018908924222  | 0.2047984531701634  | 18.8667636380932393 | Si49 |
| -2.8108507343657148 | 5.0603800634029508  | 8.1743740202037927  | Si50 |
| -4.3838503014723207 | 7.6123170482260578  | 18.9197422022749606 | Si51 |
| 4.2677773637804712  | 7.7080492832378580  | 8.2330726597945105  | Si52 |
| 2.9129563184387668  | 5.1681501943216643  | 18.8743690389345637 | Si53 |
| 8.7764263572871517  | 0.1737079730648523  | 8.2827893959716334  | Si54 |
| 5.4441498057669078  | 0.1116051934312817  | 18.8190432202630298 | Si55 |
| -4.5094085523253851 | 7.6947934615284330  | 8.2725432343837948  | Si56 |
| -2.7605927394271523 | 4.9202587052712721  | 18.8530605426608240 | Si57 |
| 2.8293187527642627  | 4.9135221043612836  | 8.3095898693245065  | Si58 |
| 4.4099708977981775  | 7.9342837805565543  | 18.8199941477414185 | Si59 |
| 7.1524394638414321  | 4.2767563551609058  | 2.5325560198587502  | Si60 |
| -0.0577373193770674 | 8.4365726416464568  | 24.5755996846563143 | Si61 |
| -0.0314398275222052 | 8.4366596768573388  | 2.5473830566264763  | Si62 |
| 7.1172724772497418  | 4.1691422115037309  | 24.6353738454019755 | Si63 |
| 7.1865733925838367  | 4.2664238574480846  | 6.2736464417469104  | Si64 |
| -0.0615085079390667 | 8.4575173163209652  | 20.8180587315381196 | Si65 |
| -0.0657440405743159 | 8.4368136648777909  | 6.2938669703175671  | Si66 |

---

|                     |                     |                     |      |
|---------------------|---------------------|---------------------|------|
| 7.1120936943863358  | 4.2847713304831156  | 20.8004175360737058 | Si67 |
| 7.1980295086161856  | 4.2463742168384648  | 9.5036970171839812  | Si68 |
| -0.0530706395277001 | 8.4679836964377220  | 17.5833866011202993 | Si69 |
| -0.0830177602193274 | 8.4330156142629757  | 9.5267249760980661  | Si70 |
| 7.1743636164217861  | 4.2823228005531213  | 17.5658090922376822 | Si71 |
| 7.1555520442581715  | 6.6304822510787353  | 22.7790802487139636 | Al1  |
| 7.7673800994764708  | 4.6412251060284850  | 0.3932070242299976  | H1   |
| -0.0509189252525211 | 9.1626249967659543  | 0.4107643859890184  | H2   |
| -0.2568451305991610 | 9.1152034803045119  | 26.7163126711693053 | H3   |
| 6.4747416919820875  | 4.3336201597025799  | 26.7853942756796854 | H4   |
| 6.1679946472153180  | 8.8807657830825200  | 23.0035374858163841 | H5   |
| Adsorbed ethene     |                     |                     |      |
| 7.0602729034984923  | 4.2407807600276017  | 0.9123674965574762  | O1   |
| -0.0049205507164878 | 8.3466989627777881  | 0.9324952481529596  | O2   |
| 5.7905795116191285  | 3.5737535367246918  | 3.0849985079931330  | O3   |
| 1.2884122415177535  | 9.1691454675784883  | 24.0162557494378177 | O4   |
| 8.4670769855016363  | 3.4438284173948719  | 3.0623547629423760  | O5   |
| -1.3600827003287983 | 9.2565541636740392  | 24.0231959767462797 | O6   |
| 7.2586479153763284  | 5.8145399024682201  | 3.0878598525088998  | O7   |
| -0.0975203267128197 | 6.8824180236174204  | 24.0039763244751008 | O8   |
| 1.1785121407833064  | 9.3780650905478531  | 3.1231119550195223  | O9   |
| 5.9253781153945928  | 3.1931872710171301  | 24.0038127866951640 | O10  |
| -1.4593363228814029 | 9.0416612245723513  | 3.0891490423760133  | O11  |
| 8.5593132610096330  | 3.6155685318119195  | 24.0489730962690906 | O12  |
| 0.1562311078232135  | 6.9047407710115314  | 3.0963364543004253  | O13  |
| 6.8440549645748590  | 5.6840273498605978  | 24.1683490654761250 | O14  |
| 4.9580603781988550  | 1.3917499496940227  | 4.3680924729698978  | O15  |
| 2.0503430144159749  | 11.3746535204990575 | 22.7180357875594403 | O16  |
| 10.7780690681729219 | 3.7920502394464286  | 4.3452939928435752  | O17  |
| -3.6589229715226046 | 8.9469851475428417  | 22.7108257563839366 | O18  |
| 5.7785157380942209  | 7.6231235517950404  | 4.3802812690775959  | O19  |
| 1.3966817825587792  | 5.1230581435248173  | 22.6911642887608807 | O20  |
| 2.3815426555755232  | 11.3014822111110878 | 4.5064541832594127  | O21  |
| 4.5903945068982654  | 1.3898965107578332  | 22.5925656304403688 | O22  |
| -3.7364337475187748 | 9.1022935447624587  | 4.4711650577720805  | O23  |
| 10.8474170113998234 | 3.6451948735403161  | 22.6867992468940614 | O24  |
| 1.2201242727535422  | 4.9077718504914492  | 4.5030004047298879  | O25  |
| 5.8439116016567079  | 7.9776945073709760  | 22.7165633790237180 | O26  |
| -1.2331225072614842 | 4.8804099916381629  | 22.6399769092036856 | O27  |
| 8.4129102246992282  | 7.7802443471603926  | 4.4579707490902436  | O28  |
| -2.4575492694016861 | 11.2700953067117275 | 22.6839891306590182 | O29  |
| 9.5735411222187157  | 1.4415196590745138  | 4.4300465275365921  | O30  |
| 3.5647467132996384  | 9.2259418906862543  | 22.6549323604284467 | O31  |
| 3.5148360922595887  | 3.5997126558582031  | 4.4681911042391560  | O32  |

---

|                     |                     |                     |     |
|---------------------|---------------------|---------------------|-----|
| 8.5984507753505852  | 7.5268697887871800  | 22.7793226439893388 | O33 |
| -1.4083490117506285 | 5.1402438645139412  | 4.3264548762343598  | O34 |
| 9.3296920749191550  | 1.4914895900356122  | 22.6485790461531664 | O35 |
| -2.2294351008470370 | 11.2712638826321374 | 4.3257466018449691  | O36 |
| 3.7038776724362008  | 3.8806009045946395  | 22.7103552251299661 | O37 |
| 3.4895669936841047  | 8.9063779369673881  | 4.3711511204399045  | O38 |
| 5.8464285459503298  | 3.4871178047444933  | 5.7547483503809440  | O39 |
| 1.2793875522075187  | 9.2049477813486380  | 21.3308278238934044 | O40 |
| 8.5226673740256942  | 3.5108269867298927  | 5.7354597986218634  | O41 |
| -1.3836565982482707 | 9.2263428495759854  | 21.3451842927847046 | O42 |
| 7.1639731361441656  | 5.8148580343475524  | 5.7610532516118713  | O43 |
| -0.0632032549378176 | 6.8933082736096951  | 21.3320019268445016 | O44 |
| 1.2573675588838222  | 9.2593512323292089  | 5.7959606673870772  | O45 |
| 5.9125918236924226  | 3.2597619686928718  | 21.3026055688774285 | O46 |
| -1.4146017298729836 | 9.1721014003414307  | 5.7623584562410679  | O47 |
| 8.5435553553621038  | 3.7099247514671534  | 21.3632153443433559 | O48 |
| -0.0029299403922223 | 6.9008069145873137  | 5.7650777775433921  | O49 |
| 6.8181917778860219  | 5.7694361321979972  | 21.2800499824188307 | O50 |
| 7.1987017776830342  | 4.2489550324761964  | 7.8775261153488128  | O51 |
| -0.0644718158065833 | 8.4363711635934546  | 19.2004714129422140 | O52 |
| -0.0862154027790725 | 8.4273106036983734  | 7.9072418291173108  | O53 |
| 7.1688886268772958  | 4.1717676387712244  | 19.1741748412873001 | O54 |
| 5.5601984909629456  | 0.0553247572368546  | 6.5875950270919148  | O55 |
| 8.6504914533232586  | 0.1271108207725496  | 20.4666975296005056 | O56 |
| -2.8233164038276390 | 4.9917000584102702  | 6.5743917582497415  | O57 |
| -4.4332867983950095 | 7.6839864629122632  | 20.5091855047876024 | O58 |
| 4.3462907266173518  | 7.7688934786701447  | 6.6178735345523405  | O59 |
| 2.8694320913904448  | 5.0653378813626659  | 20.4749383232784723 | O60 |
| 8.9277961268910175  | 0.1768525352337101  | 6.6770116935985211  | O61 |
| 5.3325273407194107  | 0.0247641309203965  | 20.4209948258345477 | O62 |
| 9.8822344359466463  | 7.8513337266922321  | 6.6715345062398637  | O63 |
| -2.7266482355313451 | 4.7696690113015521  | 20.4475004452926470 | O64 |
| 2.7077464898838839  | 4.7913467026740886  | 6.7007125054306220  | O65 |
| 4.4564347087863201  | 8.0347048121199691  | 20.4355407380947476 | O66 |
| 7.2806599362135600  | 0.1036599715866127  | 4.5799280611642113  | O67 |
| 6.9806772263512249  | 0.2147031067828974  | 22.5124266887864977 | O68 |
| 10.7093322673968920 | 6.4447648825458614  | 4.5600876507355714  | O69 |
| -3.4492215465132099 | 6.3069363281019886  | 22.5200800192844000 | O70 |
| 3.5089864653362488  | 6.2534133361310200  | 4.6177764892867286  | O71 |
| 3.6404802333457758  | 6.5401755916255082  | 22.5168637451847076 | O72 |
| 7.1990764354860026  | 0.0966064250075715  | 8.6907524480280660  | O73 |
| 7.0135183851949527  | 0.1219936059021355  | 18.3649982384995560 | O74 |
| -3.6526628135058483 | 6.3833531941342176  | 8.6927468503618481  | O75 |
| -3.5569184973666679 | 6.2710914743375907  | 18.4158439407751153 | O76 |

---

---

|                     |                     |                     |      |
|---------------------|---------------------|---------------------|------|
| 3.5488148378920727  | 6.3133815617547882  | 8.7080504589459142  | O77  |
| 3.6164747705045182  | 6.5466162229084883  | 18.3964399159337439 | O78  |
| 4.7863702515991582  | 1.2470281282199989  | 8.7904283685629778  | O79  |
| 2.1685272811513459  | 11.4080684312776395 | 18.2832501172296986 | O80  |
| 10.9549473509743667 | 3.7114098803619218  | 8.7598844410190200  | O81  |
| -3.6794689175203068 | 8.9315652405265187  | 18.3405126912401784 | O82  |
| 5.7520748478576840  | 7.8250893773688492  | 8.8264559507047888  | O83  |
| 1.3827602219067106  | 5.0958533220663549  | 18.3266286851319578 | O84  |
| 2.3729782174123741  | 11.4157346163290363 | 8.9022840802255363  | O85  |
| 4.6750200652336220  | 1.4186448673349441  | 18.2668565259475955 | O86  |
| -3.8828833991154994 | 9.0424808477448320  | 8.9286170794643134  | O87  |
| 10.9326716473598644 | 3.5997820694511597  | 18.2109487529051286 | O88  |
| 1.3395148787404918  | 4.8221002526161634  | 8.9555951071115238  | O89  |
| 5.9127975145121576  | 7.9303609816240437  | 18.2421139169059536 | O90  |
| -1.2456641814156777 | 4.9422315032514526  | 18.2771439572417016 | O91  |
| 8.3826057799229261  | 7.5432036244490357  | 8.8172509428787134  | O92  |
| -2.5124351997109926 | 11.2898294891456175 | 18.1944556481694555 | O93  |
| 9.4327767888493721  | 1.5482837570784271  | 8.8614882504564818  | O94  |
| 3.6131848962551425  | 9.2126461921305740  | 18.2537212382810310 | O95  |
| 3.7068765352765940  | 3.6597372793583962  | 8.8581054929744223  | O96  |
| 8.5163227445107115  | 7.5027111749567696  | 18.3646755855217982 | O97  |
| -1.2695934431286175 | 5.1868597646078562  | 8.6702984815988788  | O98  |
| 9.2629683455018750  | 1.5589408426601428  | 18.3630804678987296 | O99  |
| -2.2276463404131137 | 11.1010417140771427 | 8.6826421087636341  | O100 |
| 3.7537558239238233  | 3.8901942473168631  | 18.3172702440043196 | O101 |
| 3.3589860273895047  | 8.9682651032976963  | 8.7234662987111218  | O102 |
| 6.0591749783741840  | 3.2176784567336383  | 10.0409082030568371 | O103 |
| 1.2488655948756087  | 9.2363814323260343  | 17.0318516377857385 | O104 |
| 8.6373029686230982  | 3.7888086734663928  | 10.0622068306519168 | O105 |
| -1.3789775201268584 | 9.1892105378700535  | 17.0145926197308590 | O106 |
| 6.8528758128364782  | 5.7350233440466409  | 10.0462740988002182 | O107 |
| -0.0192867099362108 | 6.9347061719145939  | 17.0040201692115431 | O108 |
| 1.1021463353117325  | 9.3990962650130143  | 10.0758959640645855 | O109 |
| 5.9721646876873624  | 3.3416184030542526  | 16.9541070026918739 | O110 |
| -1.5006486889205068 | 8.9643342110111650  | 10.0960438127797509 | O111 |
| 8.5863740212341444  | 3.7258722097652854  | 16.9676397195636071 | O112 |
| 0.1770005291185668  | 6.9254412539148316  | 10.0835705550530008 | O113 |
| 6.9450082072338883  | 5.7918895247645548  | 17.0566239947741423 | O114 |
| 3.9079102904745322  | 2.2053635618521703  | 11.0926298198566116 | O115 |
| 3.2082444361320599  | 10.5911227024695940 | 15.9997786420669641 | O116 |
| 10.6414415725860234 | 2.4603322413766158  | 11.0651168676871432 | O117 |
| -3.5594952587490143 | 10.1725377013402696 | 16.0093260912606468 | O118 |
| 7.0886371587195409  | 8.1016978454640203  | 11.0910123555810927 | O119 |
| 0.1792454924431541  | 4.5251234359509134  | 16.0503860036767279 | O120 |

---

---

|                     |                     |                     |      |
|---------------------|---------------------|---------------------|------|
| 3.3747403064661805  | 10.2155991297447812 | 11.0638829935190746 | O121 |
| 3.6481275924084411  | 2.5271956846205712  | 16.0613230272462104 | O122 |
| -3.3348954944523488 | 10.5841532788843793 | 11.0334900987814830 | O123 |
| 10.4330116272014930 | 2.0965154908151562  | 16.0571946130610215 | O124 |
| -0.2936832735484041 | 4.5378088796156586  | 11.0454619233049964 | O125 |
| 7.4201953651709154  | 8.1705545853598416  | 16.0523172592844148 | O126 |
| 2.3442918250555800  | 0.1369999220305646  | 11.7300249719097049 | O127 |
| 12.0473221248593916 | 0.0968082525610176  | 15.3322467932988751 | O128 |
| -1.2376575513854133 | 2.1663757005887163  | 11.7871375063412618 | O129 |
| -6.0929860705203316 | 10.5680398886990030 | 15.3061145631502669 | O130 |
| 5.9455421339545182  | 10.4402747805402019 | 11.6786092771560721 | O131 |
| 1.1155765938845894  | 2.1428196588289685  | 15.3189461535516305 | O132 |
| 11.6244711550774156 | 0.0803232766823031  | 11.6125458276353832 | O133 |
| 2.7733721931517330  | 0.1067914732313966  | 15.5009317851866424 | O134 |
| -5.8780820770552653 | 10.2110099807178347 | 11.6397887490411591 | O135 |
| -1.4763859565292852 | 2.5618691944007956  | 15.4690059888727021 | O136 |
| 1.3599435702412159  | 2.5701098073768969  | 11.6338328507411539 | O137 |
| 5.7555817660372028  | 10.1390248034100221 | 15.5103386378626436 | O138 |
| 3.1052607344263841  | 1.9237253346941430  | 13.5634397945207077 | O139 |
| 4.0605593783734237  | 10.7658859051852396 | 13.5379807320069858 | O140 |
| 11.2107280125028872 | 1.8886863445139277  | 13.5524389144153972 | O141 |
| -4.1031884928804265 | 10.8262202756249728 | 13.5345969570468547 | O142 |
| 7.1507401738291296  | 8.9596577892023515  | 13.5545010451762487 | O143 |
| -0.0556163485694499 | 3.7744942192148367  | 13.5532062027320492 | O144 |
| -0.0596480616535207 | 8.3083308972559475  | 26.1816744268588764 | O145 |
| 7.1991274335050521  | 3.9596520221115781  | 26.2391049053663394 | O146 |
| 5.0297692135492955  | 3.0134405215149105  | 4.4109751392571663  | Si1  |
| 2.0146717600745534  | 9.7577885033861911  | 22.6865394492649308 | Si2  |
| 9.3333299322526102  | 3.0497209546020372  | 4.3853013468656705  | Si3  |
| -2.2137544889114347 | 9.6660200766562756  | 22.6936326185460828 | Si4  |
| 7.1509197273892298  | 6.7549685160754622  | 4.4144403811556741  | Si5  |
| -0.0057642098629547 | 5.9451551447703999  | 22.6737344704679593 | Si6  |
| 2.0773357870516342  | 9.7047758693352026  | 4.4436170806329542  | Si7  |
| 5.0458469874778729  | 2.9572531321572564  | 22.6617537964118618 | Si8  |
| -2.2056633276304329 | 9.6487327516149737  | 4.4054630434771038  | Si9  |
| 9.3021765760056994  | 3.1221501130682325  | 22.6932286830635057 | Si10 |
| -0.0119368390558985 | 5.9648969776486735  | 4.4159325657018211  | Si11 |
| 4.6036593022748669  | 2.5907656999318687  | 9.6841446477424533  | Si12 |
| 2.5618073459426371  | 10.1097388081464903 | 17.4010941865285993 | Si13 |
| 9.9170083055943401  | 2.8634596494221842  | 9.6765745411164286  | Si14 |
| -2.7832567905096037 | 9.9015471518567448  | 17.4037422280857754 | Si15 |
| 7.0307662647752753  | 7.3084758390009039  | 9.6835350003938139  | Si16 |
| 0.0631341697995813  | 5.3696595827461460  | 17.4242058609697708 | Si17 |
| 2.5579696070894675  | 10.0031416409789227 | 9.6817470467391917  | Si18 |

---

---

|                     |                     |                     |      |
|---------------------|---------------------|---------------------|------|
| 4.5131739133279449  | 2.7852055043174846  | 17.4058839920086541 | Si19 |
| -2.7434587445842897 | 9.9262062862465790  | 9.6770205084875531  | Si20 |
| 9.8106281678537766  | 2.7487412456497511  | 17.4055092647193419 | Si21 |
| -0.0099193116654495 | 5.3621421208654443  | 9.6793550661563899  | Si22 |
| 7.2013759699169144  | 7.3496404191713269  | 17.4350798263408535 | Si23 |
| 2.6775074867696449  | 1.7034275273327391  | 12.0086709395988400 | Si24 |
| 4.4673453548341975  | 11.0298253529632326 | 15.0899420177062424 | Si25 |
| 11.6706980244228298 | 1.6509536369854154  | 12.0083142740117275 | Si26 |
| -4.5537111103676260 | 11.0430704528403751 | 15.0836367153474633 | Si27 |
| 7.1801607722659782  | 9.4337487166765435  | 11.9975746639182201 | Si28 |
| -0.0565294157607275 | 3.2476358265381347  | 15.0943782295673721 | Si29 |
| 4.4512181061632852  | 11.0019496671630854 | 11.9774645501143233 | Si30 |
| 2.6596240409013738  | 1.6761559322254456  | 15.1091103625171073 | Si31 |
| -4.5481144630020474 | 11.0651453740427961 | 11.9877079174476435 | Si32 |
| 11.6611926788430953 | 1.6607357466419326  | 15.1009467384442964 | Si33 |
| -0.0572487884548287 | 3.2607950483831392  | 12.0080855033747316 | Si34 |
| 7.1706096864751991  | 9.4571335045648350  | 15.1039464528301224 | Si35 |
| 5.6996937801365002  | 0.0802129078788718  | 4.9784899584509201  | Si36 |
| 8.5490817867848037  | 0.1938753280162170  | 22.0759341247343279 | Si37 |
| -2.9027231256484307 | 5.0950119758266323  | 4.9644507955087631  | Si38 |
| -4.3770795903185808 | 7.5974003620465211  | 22.1305274621247285 | Si39 |
| 4.2783632647740095  | 7.6354656485441028  | 5.0088251780977657  | Si40 |
| 2.9027425113230265  | 5.1350347972856349  | 22.0847097167895932 | Si41 |
| 8.8397296380037034  | 0.1319602957465426  | 5.0621274112201373  | Si42 |
| 5.4213726198245737  | 0.1054520521638330  | 22.0350972108769554 | Si43 |
| 9.9281151981994871  | 7.7900222834078958  | 5.0550370786007113  | Si44 |
| -2.7640456265096618 | 4.9045792645083734  | 22.0628769128905695 | Si45 |
| 2.7411198192187984  | 4.8923523938202136  | 5.0854142849875883  | Si46 |
| 4.3024511669869447  | 7.9260302005850507  | 22.0259681112085595 | Si47 |
| 5.6432835515014350  | 0.0035415568496357  | 8.2005573994303855  | Si48 |
| 8.5694650991791939  | 0.1833179991943604  | 18.8548310607073937 | Si49 |
| -2.8131884554072535 | 5.0746901780563292  | 8.1879974905681276  | Si50 |
| -4.3919691257268187 | 7.5892970254505769  | 18.9036813952631277 | Si51 |
| 4.2493276023761792  | 7.7086377225723313  | 8.2300338293322781  | Si52 |
| 2.9063115375972899  | 5.1505091310362294  | 18.8618461129007002 | Si53 |
| 8.7805386943706196  | 0.1810374508655232  | 8.2884947726293863  | Si54 |
| 5.4407791889875590  | 0.0951433876461082  | 18.8091867515836242 | Si55 |
| 9.9042975967624631  | 7.7009066423085102  | 8.2832543104673064  | Si56 |
| -2.7678019227309818 | 4.9047288716481070  | 18.8375390003512102 | Si57 |
| 2.8261331865093946  | 4.9038193758943862  | 8.3108810567082543  | Si58 |
| 4.3991580722355446  | 7.9141576104021309  | 18.8111069831451978 | Si59 |
| 7.1558458728208532  | 4.2749859393608096  | 2.5343566873490988  | Si60 |
| -0.0663946527992163 | 8.4131053485184850  | 24.5599347677848918 | Si61 |
| -0.0336624411677073 | 8.4313364186640243  | 2.5551785787235288  | Si62 |

---

|                     |                     |                     |      |
|---------------------|---------------------|---------------------|------|
| 7.1163129817938948  | 4.1575488193049672  | 24.6188428989536625 | Si63 |
| 7.1819808921981121  | 4.2663372625006417  | 6.2740090460434539  | Si64 |
| -0.0671831832267724 | 8.4362065832994499  | 20.8056168963510792 | Si65 |
| -0.0607697103500513 | 8.4398600283306529  | 6.3021703664802073  | Si66 |
| 7.1063061007700536  | 4.2640536313624349  | 20.7884531280778866 | Si67 |
| 7.1874172589595728  | 4.2469538721706526  | 9.5036484341415424  | Si68 |
| -0.0556851640299216 | 8.4488076077416689  | 17.5719264268526913 | Si69 |
| -0.0767924025256717 | 8.4290386450949715  | 9.5350932692062393  | Si70 |
| 7.1695106379657627  | 4.2629177019529534  | 17.5547494065194130 | Si71 |
| 7.1364683539130453  | 6.6283011745011171  | 22.7554063288209676 | All  |
| 7.7697609448260412  | 4.6540712522281726  | 0.3976695695879837  | H1   |
| -0.0456347295343225 | 9.1706058538081550  | 0.4241855141651037  | H2   |
| -0.2178272882161671 | 9.1128715472358852  | 26.6979158200962345 | H3   |
| 6.4894811567135537  | 4.3529096875761430  | 26.7692392093836773 | H4   |
| 6.1458563139222768  | 8.8650856841923833  | 23.0913144630598488 | H5   |
| 7.4386994916106204  | 9.5887056339693206  | 25.0293687640604894 | H6   |
| 5.7861249717166698  | 10.4526630200743433 | 24.9881434032160108 | H7   |
| 7.9872316752603849  | 10.5125957192453470 | 22.8028742251061836 | H8   |
| 6.3357094068194204  | 11.3834919998787765 | 22.7536653999687672 | H9   |
| 6.7336476308233628  | 10.2284621474566801 | 24.4923347069532191 | C1   |
| 7.0310219451363247  | 10.7293240094531637 | 23.2853874508391030 | C2   |

TS1

|                     |                     |                     |     |
|---------------------|---------------------|---------------------|-----|
| 7.0633069068217074  | 4.2333539227009886  | 0.9299314926146007  | O1  |
| -0.0260083116940271 | 8.3325016258303499  | 0.9495488842295260  | O2  |
| 5.7888972041997269  | 3.5572167630559117  | 3.0972715150212116  | O3  |
| 1.3219855926255875  | 9.1095839616637999  | 24.0233174492808992 | O4  |
| 8.4657582727695786  | 3.4409165523306986  | 3.0849951137410239  | O5  |
| -1.3220561372352080 | 9.3032604028517447  | 23.9957772357856562 | O6  |
| 7.2487591215502931  | 5.8066612707042422  | 3.1052240097941630  | O7  |
| -0.1543001409932163 | 6.8784299487570086  | 24.0013711860022170 | O8  |
| 1.1545103397281160  | 9.3787454778042250  | 3.1338229120055652  | O9  |
| 5.8982681325925546  | 3.2535077749949348  | 24.0267014268142240 | O10 |
| -1.4799034501726007 | 9.0087768255537384  | 3.1136038564286346  | O11 |
| 8.5518308412957200  | 3.5661114189766101  | 24.0294651335143818 | O12 |
| 0.1583781502655226  | 6.8917493913095758  | 3.1129191977103132  | O13 |
| 6.9235605221654417  | 5.7120004938989615  | 24.1067652747349612 | O14 |
| 4.9563568307688506  | 1.3733185128135730  | 4.3827592091139653  | O15 |
| 2.0029199743819417  | 11.3360511463553824 | 22.7357967172948996 | O16 |
| 10.7700237226762958 | 3.7948739612566942  | 4.3780427723830107  | O17 |
| -3.6110316448104922 | 8.9353594852902898  | 22.6896889678953784 | O18 |
| 5.7628844089115150  | 7.6133936431201148  | 4.3902278910993351  | O19 |
| 1.3668701744944660  | 5.1448951867380908  | 22.6755026287286050 | O20 |
| 2.3824001725445871  | 11.2965812411003714 | 4.5079576588402848  | O21 |
| 4.5817548163223742  | 1.4252853876084322  | 22.6241237443293244 | O22 |



---

|                     |                     |                     |     |
|---------------------|---------------------|---------------------|-----|
| -3.7515443877030115 | 9.1022506653303807  | 4.5066303734813529  | O23 |
| 10.8450235878973800 | 3.6054647986552211  | 22.6726904725223513 | O24 |
| 1.2094843349055826  | 4.8858421872413995  | 4.5120417215147466  | O25 |
| 5.8872870012132958  | 7.9907122067197003  | 22.6554089212687479 | O26 |
| -1.2592850571504171 | 4.8706394683309284  | 22.6321060315484885 | O27 |
| 8.3966251958941847  | 7.7751405669026363  | 4.4810927397109568  | O28 |
| -2.4838587888831176 | 11.2950318766003885 | 22.6707430002742925 | O29 |
| 9.5749737835002016  | 1.4398721754117771  | 4.4502398703538342  | O30 |
| 3.6050820526678518  | 9.2470602714133658  | 22.6770824434353315 | O31 |
| 3.5070741680755777  | 3.5794033600930626  | 4.4714409007169680  | O32 |
| 8.5965472704257273  | 7.6118351706400880  | 22.7241712782400995 | O33 |
| -1.4190636890087032 | 5.1488029250248708  | 4.3575408956778920  | O34 |
| 9.3458589323275643  | 1.4409949288583817  | 22.6410391209634518 | O35 |
| -2.2171307027006488 | 11.2509098592591616 | 4.3431189342070118  | O36 |
| 3.6753913167166661  | 3.9121966072843701  | 22.7170443579639389 | O37 |
| 3.4679721773551808  | 8.8876018306130540  | 4.3701841791409217  | O38 |
| 5.8338063017627722  | 3.4753449450923273  | 5.7661296830920641  | O39 |
| 1.3168909944367568  | 9.1468704050323382  | 21.3378358449185370 | O40 |
| 8.5089357815737756  | 3.5024979963584570  | 5.7579643043693727  | O41 |
| -1.3419363588688267 | 9.2971661875946161  | 21.3165601137968395 | O42 |
| 7.1477679611876574  | 5.8062814912384635  | 5.7771950652740838  | O43 |
| -0.1353332833443770 | 6.9043829194922974  | 21.3292993817616860 | O44 |
| 1.2459474244773343  | 9.2700002623585451  | 5.8048264152593525  | O45 |
| 5.8966984350067380  | 3.3011566340350922  | 21.3285146866839632 | O46 |
| -1.4251532165613896 | 9.1421529306740226  | 5.7867297340156032  | O47 |
| 8.5445116919692587  | 3.6329445209112903  | 21.3393386001858403 | O48 |
| 0.0209154758321870  | 6.8930710223449800  | 5.7847654187195747  | O49 |
| 6.9240683051505716  | 5.7714631003967316  | 21.2151109434604699 | O50 |
| 7.1718016622240839  | 4.2451205424793201  | 7.8933136559968755  | O51 |
| -0.0354400890738606 | 8.4391293948456259  | 19.1896770100986913 | O52 |
| -0.0686093255847560 | 8.4258606428540403  | 7.9255752498998264  | O53 |
| 7.1525018037343422  | 4.0870622984137590  | 19.1652047149345037 | O54 |
| 5.5586745563264470  | 0.0342603839588372  | 6.6038037689483771  | O55 |
| 8.6367742725767744  | 0.0662510490961857  | 20.4655468024309712 | O56 |
| -2.8273769288087172 | 4.9906093350518894  | 6.6060428334929577  | O57 |
| -4.3602686651599729 | 7.6647816231255863  | 20.4885427824595148 | O58 |
| 4.3201113987362945  | 7.7537066272713968  | 6.6201680450835578  | O59 |
| 2.8622000829158019  | 5.0891937529867270  | 20.4757794177434249 | O60 |
| 8.9402638841324915  | 0.1607323985992537  | 6.6912409983245773  | O61 |
| 5.2768120876709084  | 0.0869840667238074  | 20.4246359719383292 | O62 |
| 9.8495496272902514  | 7.8563562964378439  | 6.7035155856386970  | O63 |
| -2.7585161237512188 | 4.7761264860489625  | 20.4431355281774891 | O64 |
| 2.7035525369857254  | 4.7735193595847756  | 6.7043980241204117  | O65 |
| 4.4162085144250307  | 8.0548389861057679  | 20.4426042977417737 | O66 |

---

---

|                     |                     |                     |      |
|---------------------|---------------------|---------------------|------|
| 7.2840534299917676  | 0.0998738506286233  | 4.5996565386240649  | O67  |
| 6.9619044709055142  | 0.2335583279524805  | 22.4997499268213090 | O68  |
| 10.6947890535983596 | 6.4464030282670368  | 4.5988263295450009  | O69  |
| -3.5026018543718513 | 6.2707043070557305  | 22.5428290598934957 | O70  |
| 3.4986282301946212  | 6.2335092427799275  | 4.6174404339970065  | O71  |
| 3.5981009301159861  | 6.5815426138583470  | 22.5280172432476782 | O72  |
| 7.2046187114154812  | 0.0877965562177603  | 8.7007787855086960  | O73  |
| 6.9737442266445200  | 0.1341803567493436  | 18.3794378303290316 | O74  |
| -3.6792286207334244 | 6.3807586555731151  | 8.7162893450223038  | O75  |
| -3.5637379719162259 | 6.2349099987481740  | 18.3767607735786527 | O76  |
| 3.5306488907017135  | 6.3005143424616161  | 8.7135483976218104  | O77  |
| 3.6208476531048155  | 6.5606145856034042  | 18.3892404723177627 | O78  |
| 4.7902377782525729  | 1.2351657699017740  | 8.8008533064210130  | O79  |
| 2.0727661194209794  | 11.3302165676562954 | 18.2719274431496146 | O80  |
| 10.9541037648392034 | 3.7138600908955781  | 8.7930812289395845  | O81  |
| -3.6069974207417750 | 8.8957576578367057  | 18.3169640244885663 | O82  |
| 5.7331374824388632  | 7.8144485886871307  | 8.8247452070937467  | O83  |
| 1.3546162298189470  | 5.1628598036812479  | 18.3408551483010527 | O84  |
| 2.3838190512964088  | 11.4205967557829808 | 8.9276760345939490  | O85  |
| 4.6439801715958051  | 1.4411090868286609  | 18.2449515077409963 | O86  |
| -3.8855831982734408 | 9.0390698605309918  | 8.9557472707255616  | O87  |
| 10.8893224380231270 | 3.5625192321143895  | 18.2307350161183486 | O88  |
| 1.3252397328876957  | 4.8032099267178303  | 8.9541165783128296  | O89  |
| 5.9371714021429289  | 7.9089377531270877  | 18.2853202459231952 | O90  |
| -1.2648409923764308 | 4.8658289229276859  | 18.2751798256082765 | O91  |
| 8.3653799424413364  | 7.5556170572362404  | 8.8595371026036851  | O92  |
| -2.5584601597551226 | 11.3100567522633408 | 18.2149458810593572 | O93  |
| 9.4267851011535804  | 1.5540576108142503  | 8.8670774747119481  | O94  |
| 3.6666285387376343  | 9.2305183000067021  | 18.2310493801025473 | O95  |
| 3.6973153274197097  | 3.6446471925050719  | 8.8631318808104691  | O96  |
| 8.5459627478074474  | 7.5415209827074632  | 18.3643108256317298 | O97  |
| -1.2833079381629722 | 5.2116857671191585  | 8.7024676884921703  | O98  |
| 9.2675169207641925  | 1.4904375426949956  | 18.3632040670046841 | O99  |
| -2.2183617617349967 | 11.0878066629845176 | 8.7076652182924121  | O100 |
| 3.6973141782558945  | 3.9014894222900125  | 18.3034135559391835 | O101 |
| 3.3391373480896176  | 8.9584045555450711  | 8.7224089142287635  | O102 |
| 6.0424090157186754  | 3.2133608754128211  | 10.0615155759391879 | O103 |
| 1.3155247521363664  | 9.1095518272079570  | 16.9981921110963334 | O104 |
| 8.6202462065132170  | 3.7928981799885269  | 10.0692903974861832 | O105 |
| -1.3102377003832055 | 9.2883764435257916  | 17.0158265975396752 | O106 |
| 6.8297999986921942  | 5.7329701914246218  | 10.0623721986988688 | O107 |
| -0.1477883898335994 | 6.9196915021677414  | 17.0086383288253771 | O108 |
| 1.1042999408766994  | 9.4090635545642893  | 10.0995644018064930 | O109 |
| 5.9216189456874471  | 3.3790625427992413  | 16.9283358284404422 | O110 |

---

---

|                     |                     |                     |      |
|---------------------|---------------------|---------------------|------|
| -1.4953547470210120 | 8.9421070086656957  | 10.1091806760844900 | O111 |
| 8.5517337466786660  | 3.6511306283957632  | 16.9572176828208683 | O112 |
| 0.2088649757952132  | 6.9233752161776758  | 10.0984462880041956 | O113 |
| 6.9937200779451354  | 5.7807543679413174  | 17.0940954445951263 | O114 |
| 3.8859466445597661  | 2.1866663799604198  | 11.0949230877344593 | O115 |
| 3.1975809551280108  | 10.6140046178292042 | 15.9988668186050678 | O116 |
| 10.6085403132323428 | 2.4597877504628691  | 11.0882718268655314 | O117 |
| -3.5413339808887643 | 10.1728824780297167 | 16.0082556114255894 | O118 |
| 7.0280356989490578  | 8.1015595109911445  | 11.1114313100827200 | O119 |
| 0.1953159316220394  | 4.5130135978535852  | 16.0614060187979888 | O120 |
| 3.4072606957158378  | 10.1945110492513589 | 11.0638906254106093 | O121 |
| 3.6060759615696352  | 2.5433792175248531  | 16.0447857938482166 | O122 |
| -3.3161489117603700 | 10.5692771394345666 | 11.0627194605816719 | O123 |
| 10.4241030091205591 | 2.0603707816460179  | 16.0658045891414716 | O124 |
| -0.2902473307683207 | 4.5395243710470350  | 11.0600495804485472 | O125 |
| 7.4016161162009819  | 8.1530982188048000  | 16.0628378452585210 | O126 |
| 2.3237442354447282  | 0.1103580496509486  | 11.7082157586156352 | O127 |
| 12.0707138080460759 | 0.0936810703786998  | 15.3284574427281957 | O128 |
| -1.2613703560432219 | 2.1731389718189171  | 11.7851775864844655 | O129 |
| -6.0920736445055654 | 10.5486932903368089 | 15.3432419528574115 | O130 |
| 5.9712548103934804  | 10.4802815362715283 | 11.7048614374596571 | O131 |
| 1.0811656257522082  | 2.1120202891694766  | 15.3125918775514247 | O132 |
| 11.6017627691717387 | 0.0819137910957706  | 11.6143940387625957 | O133 |
| 2.7612320255240772  | 0.0992366245914404  | 15.5289207827802755 | O134 |
| -5.8610462672878558 | 10.1626987778363613 | 11.6341083227488742 | O135 |
| 12.9340407703366171 | 2.5802771769770128  | 15.4822239062576905 | O136 |
| 1.3365131186516837  | 2.5450007413681477  | 11.6355202276316341 | O137 |
| 5.7477855683013672  | 10.1298931295219745 | 15.5245395565194322 | O138 |
| 3.0762110596222465  | 1.8829946516701732  | 13.5604971460723469 | O139 |
| 4.0628630676145345  | 10.7634436025608338 | 13.5424857510105063 | O140 |
| 11.2019293559181037 | 1.8830857917347976  | 13.5631008502583192 | O141 |
| -4.1271993397563236 | 10.8331043892093497 | 13.5472534322706206 | O142 |
| 7.1519321007163192  | 8.9640884785113357  | 13.5697697613337525 | O143 |
| -0.0654736417742807 | 3.7673418436749539  | 13.5598176556558432 | O144 |
| -0.0889731687202850 | 8.3177348128574842  | 26.1732677478934050 | O145 |
| 7.2346155540226720  | 4.0278873069433532  | 26.2173666913447754 | O146 |
| 5.0237542169694764  | 2.9958509891151017  | 4.4208574665327074  | Si1  |
| 2.0399365123925692  | 9.7163547504292662  | 22.6926519471008490 | Si2  |
| 9.3279643190799852  | 3.0474063299841965  | 4.4108123654014602  | Si3  |
| -2.1843903739256425 | 9.6966157330628651  | 22.6673265442034939 | Si4  |
| 7.1364944575278297  | 6.7472309921231020  | 4.4318498480989605  | Si5  |
| -0.0430740851353444 | 5.9496976300313360  | 22.6641815262581048 | Si6  |
| 2.0648912106431663  | 9.7017680494386802  | 4.4479977662182826  | Si7  |
| 5.0258890966629872  | 3.0012493469749244  | 22.6816775348044821 | Si8  |

---

---

|                     |                     |                     |      |
|---------------------|---------------------|---------------------|------|
| -2.2137855928652770 | 9.6286326618760274  | 4.4315119521084583  | Si9  |
| 9.3012809848969322  | 3.0730400185410534  | 22.6779657454545003 | Si10 |
| -0.0123285820508077 | 5.9562272772096261  | 4.4361496459953162  | Si11 |
| 4.5927851982167258  | 2.5772496720195086  | 9.6936668639235055  | Si12 |
| 2.5660418379583003  | 10.0692857875535644 | 17.3851789955107030 | Si13 |
| 9.9013800674090895  | 2.8664461893008220  | 9.6930707295746164  | Si14 |
| -2.7542692657015611 | 9.9211107491194443  | 17.4006586288884009 | Si15 |
| 7.0013720257193945  | 7.3078875452364587  | 9.7031656966496556  | Si16 |
| 0.0280856934490257  | 5.3607113207525874  | 17.4305487401551424 | Si17 |
| 2.5640495614167467  | 10.0003507992989444 | 9.6947985403240811  | Si18 |
| 4.4704546139720218  | 2.8097602137668396  | 17.3883807819400182 | Si19 |
| -2.7354435601805860 | 9.9120171592228328  | 9.7005625090460050  | Si20 |
| 9.7869898581842403  | 2.6975925955542785  | 17.4125856360156952 | Si21 |
| -0.0077161152982979 | 5.3630625455241869  | 9.6945025087782408  | Si22 |
| 7.2182075666087915  | 7.3445187807534751  | 17.4592262067621142 | Si23 |
| 2.6535340107698491  | 1.6755885038628733  | 12.0035416105904567 | Si24 |
| 4.4687630151276263  | 11.0297028453669661 | 15.0944426544636894 | Si25 |
| 11.6510780530606333 | 1.6512442374565377  | 12.0163903254263236 | Si26 |
| -4.5597037697710743 | 11.0373180000206226 | 15.1019284845907915 | Si27 |
| 7.1757751375047185  | 9.4329129170956048  | 12.0117680309898773 | Si28 |
| -0.0696043139790696 | 3.2421312878181339  | 15.1017123297973299 | Si29 |
| 4.4594321959946335  | 11.0062074133750691 | 11.9847915597202181 | Si30 |
| 2.6306999995208500  | 1.6605146553617860  | 15.1093380821251344 | Si31 |
| -4.5515583972942215 | 11.0457603291697524 | 11.9918341127746366 | Si32 |
| 11.6579652478387921 | 1.6529849780617845  | 15.1084461908567480 | Si33 |
| -0.0702850375851389 | 3.2537827769547936  | 12.0146022069244012 | Si34 |
| 7.1644436796842941  | 9.4473756689882791  | 15.1236290565869318 | Si35 |
| 5.7028312186906920  | 0.0647002450132402  | 4.9952983607806516  | Si36 |
| 8.5325281960681902  | 0.1593362943910274  | 22.0733939673984665 | Si37 |
| -2.9122258553532117 | 5.0985198577218762  | 4.9970904412138877  | Si38 |
| -4.3599785704504770 | 7.5959633819235490  | 22.1113307345164536 | Si39 |
| 4.2593186071097842  | 7.6195743089449497  | 5.0110937814742638  | Si40 |
| 2.8845205230137192  | 5.1777317852089633  | 22.0876345495409794 | Si41 |
| 8.8449511081002736  | 0.1252919773159251  | 5.0762373890691510  | Si42 |
| 5.3976551785668745  | 0.1434780656211336  | 22.0371965098720075 | Si43 |
| 9.9083189042574933  | 7.7908803843073304  | 5.0878378145199568  | Si44 |
| -2.7916945525160299 | 4.8865738368273099  | 22.0595692713910125 | Si45 |
| 2.7331086009465988  | 4.8720841360442284  | 5.0892699219161788  | Si46 |
| 4.3719080607360645  | 7.9332567853088642  | 22.0529592803506986 | Si47 |
| -1.5690434778649482 | 12.4891715051450820 | 8.2164791507182873  | Si48 |
| 8.5344117909712871  | 0.1362315202284224  | 18.8547361243720886 | Si49 |
| -2.8242868960444349 | 5.0806708866277557  | 8.2188013708041225  | Si50 |
| -4.3539251658637124 | 7.5743125965806506  | 18.8809465750241756 | Si51 |
| 4.2288747913413784  | 7.6965631651372615  | 8.2324214190389284  | Si52 |

---

|                     |                     |                     |      |
|---------------------|---------------------|---------------------|------|
| 2.8860957961867615  | 5.1810317557324073  | 18.8632120229591571 | Si53 |
| 8.7864517371816007  | 0.1775767536448517  | 8.3022904960853978  | Si54 |
| 5.3989951275807497  | 0.1233063415197868  | 18.8117947740851541 | Si55 |
| 9.8839037322376733  | 7.7039979018056686  | 8.3146679881896102  | Si56 |
| -2.7909784922813961 | 4.8682304366397000  | 18.8291662507595312 | Si57 |
| 2.8147559275288754  | 4.8874154677976955  | 8.3147334927613681  | Si58 |
| 4.4101923776533249  | 7.9195688863258757  | 18.8281717973942122 | Si59 |
| 7.1528448806387939  | 4.2663034199191054  | 2.5525727982134092  | Si60 |
| -0.0665806996057583 | 8.4095390451324938  | 24.5487141205779089 | Si61 |
| -0.0491329549954012 | 8.4164345211887266  | 2.5727078909008489  | Si62 |
| 7.1382243090107336  | 4.1903305727820133  | 24.5904336661842073 | Si63 |
| 7.1651932829595468  | 4.2578630262716359  | 6.2899687638679866  | Si64 |
| -0.0541939291740112 | 8.4422755840080317  | 20.7945547553005063 | Si65 |
| -0.0565076248780940 | 8.4322634366550542  | 6.3205684416773451  | Si66 |
| 7.1250562191144393  | 4.2426855070353087  | 20.7760691338499974 | Si67 |
| 7.1659901642925998  | 4.2456771543537437  | 9.5191376913901742  | Si68 |
| -0.0463197035221636 | 8.4383440057912278  | 17.5599488645769384 | Si69 |
| -0.0624943110096767 | 8.4255188382795332  | 9.5533008874237488  | Si70 |
| 7.1563159468991362  | 4.2336717440203326  | 17.5524229716276032 | Si71 |
| 7.1228438301426440  | 6.6856781890539532  | 22.6851074571451328 | All  |
| 7.7678795930192539  | 4.6612467076859945  | 0.4200584301143004  | H1   |
| -0.0624420556506156 | 9.1584846101133852  | 0.4437835573349291  | H2   |
| -0.1920736467440909 | 9.1413423992175691  | 26.6737046463709859 | H3   |
| 6.5122074735761633  | 4.4123418875817926  | 26.7364152449695105 | H4   |
| 6.8756766384774552  | 9.5223254396594363  | 22.4627980932904912 | H5   |
| 7.1478948992805131  | 9.0901235571372219  | 24.5739731796147680 | H6   |
| 5.5368135762135093  | 9.9552779171175256  | 24.1631229324228549 | H7   |
| 8.3513952256935227  | 10.4988756347483960 | 22.9104408246519391 | H8   |
| 6.7334092113220514  | 11.3643339813998807 | 22.4804930598191248 | H9   |
| 6.6063426172208457  | 9.8284364037773972  | 23.9770996621942238 | C1   |
| 7.2620012492708774  | 10.5515516885768363 | 22.9842521689147645 | C2   |

Ethoxy

|                     |                     |                     |     |
|---------------------|---------------------|---------------------|-----|
| 7.0732131574767383  | 4.21456732088866219 | 0.9264529135744231  | O1  |
| -0.0226571576448080 | 8.3269752898963052  | 0.9463542316060708  | O2  |
| 5.7960466885044681  | 3.5537943289919558  | 3.0971165217495615  | O3  |
| 1.2592680293060754  | 9.1477847911676609  | 23.9690615092562176 | O4  |
| 8.4730371715506863  | 3.4439075862101194  | 3.0909618806588259  | O5  |
| -1.3888024236820460 | 9.2614272848650927  | 24.0118592641756230 | O6  |
| 7.2491438943024473  | 5.8066387363419665  | 3.0886150223545514  | O7  |
| -0.1454085030925585 | 6.8739821503409564  | 24.0284664075060022 | O8  |
| 1.1651742755640973  | 9.3681081300499365  | 3.1283259117249336  | O9  |
| 5.9199489572527311  | 3.1903291460892995  | 24.0094034500323161 | O10 |
| -1.4703511300411600 | 9.0135855144641841  | 3.1106439975388667  | O11 |
| 8.5601199834807034  | 3.5710140262427306  | 24.0424436583183940 | O12 |

---

|                     |                     |                     |     |
|---------------------|---------------------|---------------------|-----|
| 0.1552170631522252  | 6.8870205903308515  | 3.1110314911646850  | O13 |
| 6.8736385262008124  | 5.6685445212824508  | 24.1683801565914429 | O14 |
| 4.9643415464615996  | 1.3672546309306213  | 4.3747818035687782  | O15 |
| 2.0195290355026687  | 11.3643755325311968 | 22.6870311118537984 | O16 |
| 10.7784799812412704 | 3.7767010332073316  | 4.3873320746131554  | O17 |
| -3.6533894960450031 | 8.9225608275129620  | 22.6518266638294143 | O18 |
| 5.7686977191432733  | 7.6072813635029970  | 4.3890030173564742  | O19 |
| 1.4255039723672538  | 5.1808421861675935  | 22.7205662145463236 | O20 |
| 2.3868240405202021  | 11.2871015096218201 | 4.5063971368054219  | O21 |
| 4.5682796022277348  | 1.3949456956872717  | 22.5964272182017929 | O22 |
| -3.7433719644268648 | 9.0866629668406045  | 4.4984467708907561  | O23 |
| 10.8487745436156331 | 3.6284665129024529  | 22.6815435137682258 | O24 |
| 1.2143634641565466  | 4.8781614621652789  | 4.5005191934393096  | O25 |
| 5.8814871254756786  | 8.0178986927766243  | 22.8018861904225965 | O26 |
| -1.1993749107140388 | 4.8361424531831778  | 22.6436356550939166 | O27 |
| 8.4040089278425043  | 7.7653463194100611  | 4.4718125382142482  | O28 |
| -2.4900325596747743 | 11.2720937601097457 | 22.6682960530208462 | O29 |
| 9.5723678200952076  | 1.4287490247497001  | 4.4451581038672243  | O30 |
| 3.5585788213766110  | 9.2276449418702242  | 22.6593596872981706 | O31 |
| 3.5122541109100043  | 3.5716484883854274  | 4.4697757396087923  | O32 |
| 8.6368023217460319  | 7.4405452986147678  | 22.7201710678857900 | O33 |
| -1.4140318021175657 | 5.1373552014759820  | 4.3569600676272415  | O34 |
| 9.3074455527640243  | 1.4891360423864342  | 22.5674651961075696 | O35 |
| -2.2198570700697040 | 11.2439541111465662 | 4.3555291645167031  | O36 |
| 3.7124924548756915  | 3.8979211657967827  | 22.7041059019713281 | O37 |
| 3.4751456841775274  | 8.8799924810141206  | 4.3681788265318033  | O38 |
| 5.8377521519688891  | 3.4661381115812602  | 5.7664794513771609  | O39 |
| 1.3064629398164680  | 9.1757716766343211  | 21.2858728438361204 | O40 |
| 8.5140441669373175  | 3.4876763917628577  | 5.7642465574472155  | O41 |
| -1.3535221523720988 | 9.2661982735282340  | 21.3343593204728812 | O42 |
| 7.1559747357217152  | 5.7940137258896165  | 5.7613684636192808  | O43 |
| -0.0942518733867388 | 6.8980628047570631  | 21.3576762160476505 | O44 |
| 1.2506160986251569  | 9.2595794338958264  | 5.8007140923419405  | O45 |
| 5.9224057561082093  | 3.2389697636382024  | 21.3090566755832675 | O46 |
| -1.4204066068971701 | 9.1285734824134845  | 5.7846321497155690  | O47 |
| 8.5395708040943852  | 3.7693074549405430  | 21.3668432074989489 | O48 |
| 0.0287956334230994  | 6.8810245278076989  | 5.7826653561173309  | O49 |
| 6.7448962449952194  | 5.7741296045547745  | 21.2788314070490401 | O50 |
| 7.1733782570558038  | 4.2538820384003468  | 7.8899217193336755  | O51 |
| -0.0873690680041967 | 8.3869997787599591  | 19.1922484172708963 | O52 |
| -0.0612795162663238 | 8.4152116246650284  | 7.9229045695475415  | O53 |
| 7.1444434147656946  | 4.1811655567921129  | 19.1750256723470613 | O54 |
| 5.5499603185653648  | 0.0483184186781191  | 6.6075059689730953  | O55 |
| 8.5899913131215921  | 0.0780351824092233  | 20.4294700273187502 | O56 |

---

---

|                     |                     |                     |      |
|---------------------|---------------------|---------------------|------|
| -2.8146388188754177 | 4.9776352686450975  | 6.6096392549678065  | O57  |
| -4.3965315952582626 | 7.6332369155845239  | 20.4577015871572634 | O58  |
| 4.3217318013176378  | 7.7446422118892180  | 6.6181169953530894  | O59  |
| 2.8458936648922526  | 5.0812126237875299  | 20.4783366864982987 | O60  |
| 8.9575201012062688  | 0.1508320009949483  | 6.6923606070426054  | O61  |
| 5.2995006980003714  | 0.0425727064820630  | 20.4121719777467199 | O62  |
| 9.8550345682655021  | 7.8495064297582022  | 6.6969338818395503  | O63  |
| -2.6815021428431636 | 4.7009470344665134  | 20.4423003355848039 | O64  |
| 2.6971675329979599  | 4.7681599433751387  | 6.6988373201795701  | O65  |
| 4.5680880444783512  | 8.0900557698230671  | 20.4671057517867716 | O66  |
| 7.2857524717280855  | 0.0841913429107856  | 4.6116061186568986  | O67  |
| 6.9540401270979482  | 0.2142247834517396  | 22.4998084863269128 | O68  |
| 10.6979256865803478 | 6.4286858053165270  | 4.6010045810665536  | O69  |
| -3.3828535067308074 | 6.2892880203197379  | 22.4832443631554675 | O70  |
| 3.5041311389783178  | 6.2250494611633673  | 4.6140929377838544  | O71  |
| 3.6960972579819953  | 6.5532059330027632  | 22.4991750599304616 | O72  |
| 7.2111383657819399  | 0.0761286369690414  | 8.6938763337914011  | O73  |
| 6.9563591963907738  | 0.1067665551591657  | 18.3304423880060519 | O74  |
| -3.6786726263946585 | 6.3711464613301834  | 8.7116962809419860  | O75  |
| -3.4956422657772772 | 6.1956462511999391  | 18.3937708686164925 | O76  |
| 3.5330799600390836  | 6.2899805962279745  | 8.7100093590514440  | O77  |
| 3.6866506300399977  | 6.5767367559328154  | 18.4514613169155091 | O78  |
| 4.7947921687949577  | 1.2178027924631161  | 8.8250732020767533  | O79  |
| 2.0811758096325423  | 11.3387445054489238 | 18.2486452717477725 | O80  |
| 10.9627696031849613 | 3.7047307639529450  | 8.7998463203681947  | O81  |
| -3.5883476897678093 | 8.8489679973906270  | 18.2869969803045258 | O82  |
| 5.7327999711686930  | 7.8096059621983835  | 8.8230566953539498  | O83  |
| 1.4108203640193353  | 5.2031874718224493  | 18.2964870004634008 | O84  |
| 2.3933203423068887  | 11.4159563518636205 | 8.9331907267143045  | O85  |
| 4.6257700303739595  | 1.4218638762795544  | 18.2601472049006475 | O86  |
| -3.8838408331729397 | 9.0295827355665015  | 8.9516231047156012  | O87  |
| 10.9263693283977474 | 3.5266472329135969  | 18.2304231752557939 | O88  |
| 1.3301913275790858  | 4.7903885523833392  | 8.9560001170644057  | O89  |
| 5.9881392675764626  | 7.9394208982651415  | 18.2594159039555741 | O90  |
| -1.2077827322569690 | 4.8173801134378413  | 18.2716826551755496 | O91  |
| 8.3659407860839519  | 7.5490539088863464  | 8.8468609531447608  | O92  |
| -2.5794434298678817 | 11.2859319080853933 | 18.2068608698586658 | O93  |
| 9.4271666551193238  | 1.5496556804804220  | 8.8682280544216496  | O94  |
| 3.6913540531589124  | 9.2452948296022566  | 18.2823265738522487 | O95  |
| 3.7033131893590943  | 3.6323066510559352  | 8.8479354021035661  | O96  |
| 8.5888728122210374  | 7.4425388485981410  | 18.2928451366833862 | O97  |
| -1.2793494312927833 | 5.2067310532132671  | 8.7127251566255026  | O98  |
| 9.2332960843538192  | 1.4989785172732093  | 18.3291006064630544 | O99  |
| -2.2082089497944066 | 11.0723753799222440 | 8.6957572254742743  | O100 |

---

---

|                     |                     |                     |      |
|---------------------|---------------------|---------------------|------|
| 3.7437553825295518  | 3.9163117090898969  | 18.3144022441217125 | O101 |
| 3.3376240871937437  | 8.9484330021219236  | 8.7229611440903945  | O102 |
| 6.0478342265604565  | 3.2138595339100471  | 10.0541941910641608 | O103 |
| 1.3422860565376231  | 9.0653332344332114  | 17.0557621808565933 | O104 |
| 8.6240546620331333  | 3.7942758854398564  | 10.0634440464911386 | O105 |
| -1.2862311034118621 | 9.2938090888387652  | 17.0040128957567589 | O106 |
| 6.8341832871150263  | 5.7343786480169694  | 10.0650324747547764 | O107 |
| -0.1635393360107198 | 6.9032602973937118  | 16.9877700605492166 | O108 |
| 1.1029616237193292  | 9.4073551371573103  | 10.0977088325707491 | O109 |
| 5.9555040248702866  | 3.3296599265055966  | 16.9574730798321340 | O110 |
| -1.4940897621197728 | 8.9279440881845282  | 10.1036411657123679 | O111 |
| 8.5768604769516479  | 3.7089051865253482  | 16.9886052428489869 | O112 |
| 0.2217241037849487  | 6.9173996510853071  | 10.0978220022058629 | O113 |
| 6.9331418663497502  | 5.7776818576754643  | 17.0378008265352250 | O114 |
| 3.8927530197724582  | 2.2082441706898597  | 11.1013676480652048 | O115 |
| 3.2091463198088954  | 10.5499445375319869 | 15.9997112923255855 | O116 |
| 10.5980710169810735 | 2.4532467157658249  | 11.0962277763785373 | O117 |
| -3.5297886348039507 | 10.1504649016662221 | 15.9915176657052065 | O118 |
| 7.0403896578510352  | 8.1109221910666705  | 11.0999378138912803 | O119 |
| 0.2266423535351154  | 4.4937422076871680  | 16.0468780061662954 | O120 |
| 3.4066784426856165  | 10.1811782181061687 | 11.0688356339729577 | O121 |
| 3.6109900692776002  | 2.5472602185248290  | 16.0629093539568046 | O122 |
| -3.3082771213611037 | 10.5681850232562731 | 11.0505454200947284 | O123 |
| 10.4079781658641579 | 2.0890325042764735  | 16.0418849668300467 | O124 |
| -0.2767734498244754 | 4.5387661605342702  | 11.0696093172174859 | O125 |
| 7.4292921837467887  | 8.1544978350752118  | 16.0292448166385384 | O126 |
| 2.3514696304078786  | 0.1176935420171938  | 11.7195163294407756 | O127 |
| 12.0275303528319206 | 0.0837215970024804  | 15.3522822710597318 | O128 |
| -1.2598095278419470 | 2.1622211915884852  | 11.7429423853965975 | O129 |
| -6.0768161389192468 | 10.5643885511789897 | 15.3343271045693577 | O130 |
| 5.9727724563111009  | 10.4866650287438627 | 11.6866838457839588 | O131 |
| 1.0937788652492537  | 2.0861651807607311  | 15.3075347177742724 | O132 |
| 11.5890099721657904 | 0.0751438661423637  | 11.6164800990957975 | O133 |
| 2.8054147128188767  | 0.0938987286056401  | 15.5161491118381161 | O134 |
| -5.8564654258135507 | 10.1818979117028263 | 11.6164086853435542 | O135 |
| -1.4858915854690020 | 2.5501374696280839  | 15.5146052249661199 | O136 |
| 1.3413800553632269  | 2.5372994461301874  | 11.6457210910929447 | O137 |
| 5.7676011273068566  | 10.1393852536567746 | 15.5261006366616243 | O138 |
| 3.0985929824374083  | 1.9013530216911383  | 13.5676210313856949 | O139 |
| 4.0764638380396967  | 10.7523329712249289 | 13.5440140119409840 | O140 |
| 11.2391011036877639 | 1.8873739654552379  | 13.5618516515177276 | O141 |
| -4.1130097227806699 | 10.8174322453460157 | 13.5363528724827340 | O142 |
| 7.1607812407960107  | 8.9867478020945875  | 13.5541642453445892 | O143 |
| -0.0911175334035503 | 3.7289859035150932  | 13.5615820428205325 | O144 |

---



---

|                     |                     |                     |      |
|---------------------|---------------------|---------------------|------|
| -0.0677026186258933 | 8.3570670938027796  | 26.1726842500773813 | O145 |
| 7.2178819028494594  | 3.9379814939756623  | 26.2373384404731596 | O146 |
| 5.0294374522548306  | 2.9896834465991238  | 4.4185029465173100  | Si1  |
| 2.0038647834476286  | 9.7456784792206417  | 22.6548976084104901 | Si2  |
| 9.3323310343672752  | 3.0371261230193105  | 4.4143104856089517  | Si3  |
| -2.2228537302193434 | 9.6707488569803441  | 22.6691599940931283 | Si4  |
| 7.1418034582777192  | 6.7402999276115469  | 4.4203157371173054  | Si5  |
| -0.0091796091982563 | 5.9458012048866449  | 22.6942347062641971 | Si6  |
| 2.0711678499612169  | 9.6920914472888597  | 4.4449464850764615  | Si7  |
| 5.0425578847758494  | 2.9570418595000936  | 22.6651881392386017 | Si8  |
| -2.2084241911940867 | 9.6212449493656962  | 4.4312329055973558  | Si9  |
| 9.2979647348375636  | 3.1181349542750652  | 22.6694111169928050 | Si10 |
| -0.0088170009758981 | 5.9475372352065454  | 4.4317592005953443  | Si11 |
| 4.5981244668266150  | 2.5754691654989310  | 9.6936892256766285  | Si12 |
| 2.5825645581444547  | 10.0508832782735897 | 17.4057611040715265 | Si13 |
| 9.9023459174883985  | 2.8615103349978543  | 9.6949434664781879  | Si14 |
| -2.7461617558528002 | 9.8970263673110228  | 17.3857212125291554 | Si15 |
| 7.0052307702255749  | 7.3076091568872998  | 9.6970898635841589  | Si16 |
| 0.0598303673047291  | 5.3494348060122432  | 17.4110370457804322 | Si17 |
| 2.5660902193802286  | 9.9926012716894483  | 9.6965677797111045  | Si18 |
| 4.4853510918724364  | 2.7951790947697863  | 17.4050952576049127 | Si19 |
| -2.7304779447978738 | 9.9016321537072294  | 9.6919738304638319  | Si20 |
| 9.7915563159136738  | 2.7109743566686291  | 17.4060914313317738 | Si21 |
| 0.0009402022981568  | 5.3564825169718571  | 9.6989354998126025  | Si22 |
| 7.2375973099110311  | 7.3288491278175156  | 17.4121960303463155 | Si23 |
| 2.6691272090030731  | 1.6849728912376034  | 12.0131042785111628 | Si24 |
| 4.4689296356439892  | 11.0135115782885009 | 15.1001338610289082 | Si25 |
| 11.6558536754850408 | 1.6458076080051798  | 12.0083368463212903 | Si26 |
| -4.5379003184631053 | 11.0325684239397361 | 15.0909768209876987 | Si27 |
| 7.1834555478449538  | 9.4467404447779444  | 11.9941298776255874 | Si28 |
| -0.0626887140165242 | 3.2131603693131150  | 15.1056660575153625 | Si29 |
| 4.4597856950198400  | 10.9996874832652125 | 11.9830372765869928 | Si30 |
| 2.6517170351502255  | 1.6580225746572181  | 15.1131275637394857 | Si31 |
| -4.5382986867006441 | 11.0479447162937845 | 11.9842117696596961 | Si32 |
| 11.6569947510599583 | 1.6507257093152259  | 15.1158474484209950 | Si33 |
| -0.0720989889282271 | 3.2393414612892437  | 12.0093490982683253 | Si34 |
| 7.1819983618988772  | 9.4616110187750877  | 15.1094776858071018 | Si35 |
| 5.7027500764474208  | 0.0601017941735258  | 4.9995856607132962  | Si36 |
| 8.5150936497216243  | 0.1801367243134657  | 22.0378227423931534 | Si37 |
| -2.9049682815124038 | 5.0835366420650798  | 5.0006670321328990  | Si38 |
| -4.3400166184661950 | 7.5530473071061079  | 22.0799724945378699 | Si39 |
| 4.2648088295489774  | 7.6110415225835126  | 5.0085091284528094  | Si40 |
| 2.9202928059212669  | 5.1629321870675717  | 22.0874212795088951 | Si41 |
| 8.8493140163543043  | 0.1138870608825984  | 5.0781232254668520  | Si42 |

---

|                                     |                     |                     |      |
|-------------------------------------|---------------------|---------------------|------|
| 5.3921147274374892                  | 0.1104220694217651  | 22.0264337865872726 | Si43 |
| 9.9143293365927967                  | 7.7778788581896343  | 5.0814089345934379  | Si44 |
| -2.7278068914196867                 | 4.8638617708350553  | 22.0540229345976186 | Si45 |
| 2.7355064024482387                  | 4.8644914448599517  | 5.0834739917304210  | Si46 |
| 4.3571635874117112                  | 7.9542279542250656  | 22.0501119799929519 | Si47 |
| 5.6513657865753659                  | -0.0178666892165757 | 8.2184980983513061  | Si48 |
| 8.5139183189803767                  | 0.1356669661464641  | 18.8181639475806080 | Si49 |
| -2.8179332331861007                 | 5.0716975774863888  | 8.2223151020714074  | Si50 |
| -4.3277358496474028                 | 7.5239213317269513  | 18.8537386531792635 | Si51 |
| 4.2288645114101673                  | 7.6881370848424950  | 8.2302233967775713  | Si52 |
| 2.9233841692484228                  | 5.1932173133720170  | 18.8669585944059115 | Si53 |
| 8.7944917412400283                  | 0.1696392850962350  | 8.3025133499366017  | Si54 |
| 5.3895770468181050                  | 0.0947571127706479  | 18.7992276130467388 | Si55 |
| 9.8867771259143602                  | 7.6952330245673988  | 8.3075440033217731  | Si56 |
| -2.7329317454001671                 | 4.8203121486704630  | 18.8322830997325248 | Si57 |
| 2.8166872565988963                  | 4.8772694134744468  | 8.3088958723989812  | Si58 |
| 4.4793143071529267                  | 7.9445933536939792  | 18.8440756254164903 | Si59 |
| 7.1590778673732052                  | 4.2613896390291517  | 2.5485407152627571  | Si60 |
| -0.0949650017958188                 | 8.4181104541029548  | 24.5484159650268872 | Si61 |
| -0.0440402782303035                 | 8.4121911174297974  | 2.5691156241977740  | Si62 |
| 7.1283523216873323                  | 4.1377921073366215  | 24.6176861136350631 | Si63 |
| 7.1701251963530259                  | 4.2501788835243275  | 6.2865417673516495  | Si64 |
| -0.0661866410599075                 | 8.4277772526235992  | 20.7963093979702229 | Si65 |
| -0.0503677271968579                 | 8.4205999526430695  | 6.3176765643878880  | Si66 |
| 7.0838162579639636                  | 4.2764681310191550  | 20.7887544077265787 | Si67 |
| 7.1698516749015671                  | 4.2487632248579725  | 9.5154817722574467  | Si68 |
| -0.0492727389939436                 | 8.4133531141111781  | 17.5643549116162596 | Si69 |
| -0.0578371444159798                 | 8.4172545833732961  | 9.5505206493698385  | Si70 |
| 7.1542983062623842                  | 4.2532768965559393  | 17.5544496091927016 | Si71 |
| 7.1367099292382949                  | 6.6116648733189471  | 22.7484197546307776 | All  |
| 7.7694351793552769                  | 4.6513433125834096  | 0.4130378237991539  | H1   |
| -0.0490484441665444                 | 9.1522294419390029  | 0.4389532484988631  | H2   |
| -0.2175088033770791                 | 9.1794567652424206  | 26.6636067183579790 | H3   |
| 6.5273632426870751                  | 4.3555479385321751  | 26.7736304437702195 | H4   |
| 7.6240259710501928                  | 9.9483736663175328  | 21.9679763408441175 | H5   |
| 7.1539081385050585                  | 8.8779220084409527  | 24.1911298455877777 | H6   |
| 5.4919965764632961                  | 9.5513488783777554  | 24.1718757423714088 | H7   |
| 7.1845362034549582                  | 11.1590982257240903 | 23.1941518606397388 | H8   |
| 5.9838112595101691                  | 10.6817033716105581 | 21.9717800366744420 | H9   |
| 6.3387903268379917                  | 9.2373425841637928  | 23.5502704410320440 | C1   |
| 6.8048642707189897                  | 10.3123271436502186 | 22.6021631248381922 | C2   |
| Co-adsorption of ethoxy and benzene |                     |                     |      |
| 7.1167061364986512                  | 4.1491855658646575  | 0.9617090999524883  | O1   |
| 0.0265276948720725                  | 8.2076467403603068  | 1.0014142824479670  | O2   |

---

|                     |                     |                     |     |
|---------------------|---------------------|---------------------|-----|
| 5.8478166338433013  | 3.4266306895927392  | 3.1159381022374841  | O3  |
| 1.2909700501195642  | 9.1246898714812783  | 24.0462866063426404 | O4  |
| 8.5284491430655702  | 3.3637283342272881  | 3.1133035743990121  | O5  |
| -1.3557201863352244 | 9.1012124832100287  | 24.0622589431146601 | O6  |
| 7.2634069212806978  | 5.7021408396098305  | 3.1561041946987656  | O7  |
| -0.0108409988904095 | 6.7799280512174178  | 24.0479847753712548 | O8  |
| 1.1939145312831352  | 9.2956248988151629  | 3.1726941290667585  | O9  |
| 6.0385015653548830  | 3.0484915770283196  | 24.0532419548202476 | O10 |
| -1.4440029855217755 | 8.9423578551813421  | 3.1302460878617149  | O11 |
| 8.6266257427800301  | 3.6426956898224638  | 24.0546631100592769 | O12 |
| 0.1863120053722263  | 6.8172802853233962  | 3.1995937994908754  | O13 |
| 6.7698922848184893  | 5.6060499371396864  | 24.1652643021304456 | O14 |
| 4.9776371327222364  | 1.2733146765641752  | 4.4208626358178664  | O15 |
| 2.2029143543386613  | 11.3046157171696606 | 22.7857522074032097 | O16 |
| 10.8264432404164612 | 3.6905284398479408  | 4.4266295638573077  | O17 |
| -3.6683996005460600 | 8.8678673976985802  | 22.7522584793290044 | O18 |
| 5.8076408094140870  | 7.5370848624683653  | 4.4317821242903390  | O19 |
| 1.5056039660245162  | 5.0199314157803547  | 22.7760310626461866 | O20 |
| 2.4167663221296802  | 11.2118406345714181 | 4.5536366584856509  | O21 |
| 4.7190669425467533  | 1.2436987953560998  | 22.6338264368237851 | O22 |
| -3.7123025860003116 | 8.9927742218992552  | 4.5318500069451177  | O23 |
| 10.9245712249008875 | 3.5889939172018241  | 22.7018177642828363 | O24 |
| 1.2622797133612087  | 4.7998213627343578  | 4.5624825858817450  | O25 |
| 5.9220645535699949  | 7.9745949481859810  | 22.6049729785142937 | O26 |
| -1.1350240462078127 | 4.8066427127498583  | 22.6312822915631493 | O27 |
| 8.4441611195649351  | 7.6576613482883022  | 4.5205828761420985  | O28 |
| -2.3554607013921700 | 11.1394370906608717 | 22.6998421633626286 | O29 |
| 9.6008400683186039  | 1.3512707756556344  | 4.4928386177981228  | O30 |
| 3.5422921400262837  | 9.0390597562606967  | 22.6615817046608257 | O31 |
| 3.5613635610100256  | 3.5039069660708009  | 4.4853344816196703  | O32 |
| 8.6661564657086814  | 7.3208423720738516  | 22.8557271269709332 | O33 |
| -1.3652965996595523 | 5.0498722004981076  | 4.4414209157627029  | O34 |
| 9.3883028951651895  | 1.4419584114761379  | 22.7515695818838459 | O35 |
| -2.1948348654513437 | 11.1539033067566606 | 4.4053826335097837  | O36 |
| 3.7843100479228493  | 3.7135186107730145  | 22.7900107581299700 | O37 |
| 3.5096637116372378  | 8.8076410438882373  | 4.4085193333209105  | O38 |
| 5.8788001553382978  | 3.3714693726788387  | 5.7890092724905298  | O39 |
| 1.2441092576979083  | 9.2502991664821455  | 21.3665420029801183 | O40 |
| 8.5537425755111478  | 3.4316738724339046  | 5.7883548372240972  | O41 |
| -1.4035053951469663 | 9.0172787324155710  | 21.3809838421339045 | O42 |
| 7.1626971603553642  | 5.7168116567994547  | 5.8300076446109115  | O43 |
| 0.1267046994275067  | 6.8143315745990201  | 21.3825151106330473 | O44 |
| 1.2861444073854402  | 9.1787901735360382  | 5.8426269918568616  | O45 |
| 5.9918194915713556  | 3.1464218609444172  | 21.3568994187061563 | O46 |

---

---

|                     |                     |                     |     |
|---------------------|---------------------|---------------------|-----|
| -1.3846782768714450 | 9.0252232234377026  | 5.8057663557260542  | O47 |
| 8.6205939075201776  | 3.6164926924461493  | 21.3747726294329539 | O48 |
| 0.0814695442588258  | 6.7897137131510155  | 5.8707163113320524  | O49 |
| 6.8718321944841172  | 5.6669504312694086  | 21.2835988352917624 | O50 |
| 7.2018821372686581  | 4.1252920377597295  | 7.9292043926595763  | O51 |
| -0.0115523138753622 | 8.3435553431884060  | 19.2477818648493688 | O52 |
| -0.0408562905634353 | 8.3799871677339901  | 7.9689539566541212  | O53 |
| 7.2076267379851577  | 4.0354023665206187  | 19.2073061952264936 | O54 |
| -1.6077559426489056 | 12.4580061867985741 | 6.6482988364840709  | O55 |
| 8.8692799142897520  | 0.0760869966126976  | 20.5284618717167291 | O56 |
| -2.7924819559802541 | 4.8599610852299548  | 6.6752172259121334  | O57 |
| 9.9586826400853230  | 7.6300652264061686  | 20.5499858395802484 | O58 |
| 4.3694395775068848  | 7.6887974272983914  | 6.6628015991262197  | O59 |
| 2.9391476952598907  | 4.8990200527442394  | 20.5479602935905348 | O60 |
| 8.9562986989487428  | 0.0724971508462055  | 6.7323690537183998  | O61 |
| -1.8090901146825038 | 12.3999170282089004 | 20.4374615552399597 | O62 |
| 9.8923818638270902  | 7.7852277178417326  | 6.7479013385677984  | O63 |
| -2.6437823990458411 | 4.6652743702563404  | 20.4463094859077579 | O64 |
| 2.7739703634325958  | 4.6666552220051276  | 6.7417313736890341  | O65 |
| 4.3485014245593296  | 7.8571527447416178  | 20.4187810671275152 | O66 |
| 7.3118366579727949  | 0.0051647689286929  | 4.6301078174191455  | O67 |
| 7.1031966797625739  | 0.0627653812502858  | 22.4998851219967690 | O68 |
| 10.7460424235142060 | 6.3389570315519448  | 4.6737541076738340  | O69 |
| -3.3273208282710636 | 6.2529482636184230  | 22.4888897233529370 | O70 |
| 3.5466351534502163  | 6.1554479912157776  | 4.6679946744737997  | O71 |
| 3.8105416319244858  | 6.3612416451173077  | 22.5715371117520824 | O72 |
| 0.0247559423216437  | 12.4989306053301412 | 8.7568649634093401  | O73 |
| 7.1801582525036984  | 0.0046245683139543  | 18.4563206805144766 | O74 |
| 10.7928703297190403 | 6.2958762326071067  | 8.7566290316317605  | O75 |
| -3.5655107871250649 | 6.2085347612422650  | 18.4745540772616295 | O76 |
| 3.5848602584465308  | 6.2149656009534802  | 8.7427778800385383  | O77 |
| 3.6494109129703167  | 6.2791262111820414  | 18.3955005787311876 | O78 |
| 4.8251309180863773  | 1.1472449762190566  | 8.8457314052198281  | O79 |
| 2.3664132702799821  | 11.3414140805037196 | 18.3358540267695851 | O80 |
| 11.0080215405862560 | 3.6304022611164011  | 8.8947354575589017  | O81 |
| -3.7859053498589983 | 8.8698156384725149  | 18.3462749386497990 | O82 |
| 5.7689928815446834  | 7.7533021529556603  | 8.8796976610072633  | O83 |
| 1.4409130771192733  | 4.7704876303540420  | 18.3882083312749955 | O84 |
| 2.4339761714305972  | 11.3474729359838982 | 8.9699167791938272  | O85 |
| 4.7737901931490736  | 1.1501087079474617  | 18.1973374280593099 | O86 |
| -3.8500184790500578 | 8.9527462466320031  | 9.0115717177761177  | O87 |
| 11.0337925177084379 | 3.5562569249673599  | 18.1729298572018045 | O88 |
| 1.3681543849857545  | 4.7353491902947233  | 8.9772782558927382  | O89 |
| 5.8580840514109100  | 7.7955629263614847  | 18.2511807541890647 | O90 |

---

---

|                     |                     |                     |      |
|---------------------|---------------------|---------------------|------|
| -1.1963105493764739 | 5.0039401750505119  | 18.2802905155251381 | O91  |
| 8.4024102693767624  | 7.4674372229719630  | 8.8925449855901242  | O92  |
| -2.2380186876925121 | 11.0184305499431741 | 18.2496782849201082 | O93  |
| 9.4583184240048617  | 1.4801184927564084  | 8.8945741396157878  | O94  |
| 3.4759383719479349  | 8.9384428930844440  | 18.2129249485684745 | O95  |
| 3.7316775723273574  | 3.5588591517658936  | 8.9224829348717094  | O96  |
| 8.4649321137468156  | 7.3686542861265227  | 18.4304677327680508 | O97  |
| -1.2419713307127607 | 5.1334615974164040  | 8.7663031293376044  | O98  |
| 9.3880409232412649  | 1.4955342042661883  | 18.4076962152451138 | O99  |
| -2.1825934620397502 | 10.9996957029697384 | 8.7384915822627516  | O100 |
| 3.8356870814390955  | 3.6144303048236655  | 18.4559065357386061 | O101 |
| 3.3631062609812217  | 8.8717600606433606  | 8.7637990218525008  | O102 |
| 6.0766210617814744  | 3.1216234127045550  | 10.1135189353858035 | O103 |
| 1.1084270310467934  | 9.3644584089947145  | 17.0688498771952446 | O104 |
| 8.6491362034682631  | 3.7102123084497909  | 10.1156115226858212 | O105 |
| -1.4587955258272198 | 8.7581579748923186  | 17.0639090679076517 | O106 |
| 6.8527607305223723  | 5.6438324455302897  | 10.0760427336904659 | O107 |
| 0.3541721455461433  | 6.8308949237566612  | 17.1021548270967649 | O108 |
| 1.1363906927502594  | 9.3519425960046050  | 10.1446443045902104 | O109 |
| 6.0289463540164103  | 3.1735386450248635  | 16.9968513852612979 | O110 |
| -1.4591837686657843 | 8.8651285627719556  | 10.1605070459133113 | O111 |
| 8.6362331710500708  | 3.6455792467775403  | 17.0108218260830597 | O112 |
| 0.2642663970980492  | 6.8604509253193902  | 10.1267987417085514 | O113 |
| 6.9210539928093242  | 5.6532986894038793  | 17.0964436555526405 | O114 |
| 3.9235648041829139  | 2.0851253769696885  | 11.1437401934541462 | O115 |
| 3.2423562315619066  | 10.4238633136205685 | 16.0149447561527936 | O116 |
| 10.5954743454876130 | 2.3340494305673509  | 11.1576934949686475 | O117 |
| -3.4291845223287707 | 10.1114581848370726 | 16.0401103732791377 | O118 |
| 7.0883208440163354  | 7.9902564868099191  | 11.1611505618111710 | O119 |
| 0.2024536720689158  | 4.4433172519061115  | 16.0756351350497511 | O120 |
| 3.4491154889954956  | 10.1091905539156048 | 11.1058837292108770 | O121 |
| 3.6868297009239912  | 2.4080252464975525  | 16.1121542188538527 | O122 |
| -3.2710565769486988 | 10.5075614695401995 | 11.1013780468249692 | O123 |
| 10.4555107471269864 | 2.0302701971546675  | 16.0578634966994294 | O124 |
| -0.2019932633674357 | 4.4925189775691035  | 11.1215675964371883 | O125 |
| 7.4071428295089259  | 8.0283266545364622  | 16.0934244311230117 | O126 |
| 2.3556696944613633  | 0.0227675328267177  | 11.7975768405889969 | O127 |
| 4.8361193079106988  | 12.4854662101066332 | 15.4456178436212497 | O128 |
| 13.1951243916769059 | 2.1286858818732628  | 11.7391509738306254 | O129 |
| 8.4210637673947524  | 10.4069688143455590 | 15.4471893208214723 | O130 |
| 6.0154714960912843  | 10.3591703572993072 | 11.7491599128319901 | O131 |
| 1.1514079135004616  | 2.0482638344409811  | 15.3904975564413711 | O132 |
| 4.4747741157902094  | 12.4854938245680032 | 11.6154113166082507 | O133 |
| -4.4278017302761148 | 12.4970813521998334 | 15.5407233792542971 | O134 |

---

---

|                     |                     |                     |      |
|---------------------|---------------------|---------------------|------|
| -5.8160132042253299 | 10.0743634510931930 | 11.6418965671433075 | O135 |
| 13.0016927796996331 | 2.4404493051437126  | 15.5562874336452968 | O136 |
| 1.3733911906900860  | 2.4521300923904974  | 11.6757055516602097 | O137 |
| 5.8109328636937034  | 10.0514214174524366 | 15.5414807899078617 | O138 |
| 3.1198598723201290  | 1.8256584366626327  | 13.6131065587971616 | O139 |
| 4.1120757685858829  | 10.7092460416073667 | 13.5766293284029729 | O140 |
| 11.3136522113730393 | 1.7511028713072310  | 13.5955001730863092 | O141 |
| -4.1033489399735066 | 10.6976378200312201 | 13.5885633013695539 | O142 |
| 7.2417680687624850  | 8.8812780355325884  | 13.6111118967673725 | O143 |
| -0.0530792853780637 | 3.6332130171547972  | 13.6001249669128921 | O144 |
| -0.0076481695747432 | 8.2153670582444214  | 26.2193131297819413 | O145 |
| 7.2661819079174741  | 3.9547463731469485  | 26.2626162557457121 | O146 |
| 5.0682677885523972  | 2.8949430608005051  | 4.4433058340781200  | Si1  |
| 2.0451417718377938  | 9.6902553928670354  | 22.7237523700958555 | Si2  |
| 9.3745307746384796  | 2.9611535848809685  | 4.4472597386858759  | Si3  |
| -2.1927082476163946 | 9.5254107267242318  | 22.7288900181458899 | Si4  |
| 7.1679689290208017  | 6.6502308448310767  | 4.4777454813486717  | Si5  |
| 0.1095113224934239  | 5.8497228509194086  | 22.7150616462707475 | Si6  |
| 2.1036925413394467  | 9.6169084365623139  | 4.4873530481605783  | Si7  |
| 5.1435944310905857  | 2.8173648807633751  | 22.7200179474689534 | Si8  |
| -2.1790827790094878 | 9.5310956607540032  | 4.4619198891712770  | Si9  |
| 9.3724120602637644  | 3.0774798148034157  | 22.7284193538179586 | Si10 |
| 0.0361247204495023  | 5.8656888086785548  | 4.5121851846482581  | Si11 |
| 4.6274638954401262  | 2.4855327846200228  | 9.7440814451936344  | Si12 |
| 2.5548887820376462  | 10.0138710568809284 | 17.4201096813085847 | Si13 |
| 9.9273343569967487  | 2.7750154410273846  | 9.7523126457603251  | Si14 |
| -2.7290100139596634 | 9.7018937502935501  | 17.4397999087194400 | Si15 |
| 7.0404460623649783  | 7.2209457016196357  | 9.7388384634105201  | Si16 |
| 0.1862137009483038  | 5.2569993533942929  | 17.4746325337570774 | Si17 |
| 2.6025647994662906  | 9.9243828760848576  | 9.7367456370559520  | Si18 |
| 4.5842482896463022  | 2.5808315520285832  | 17.4500276257147355 | Si19 |
| -2.6978709161910648 | 9.8337961070838400  | 9.7435846679740763  | Si20 |
| 9.8825435876979544  | 2.6869977433641892  | 17.4245821751976884 | Si21 |
| 0.0476804745100092  | 5.2973573171679096  | 9.7377953856211690  | Si22 |
| 7.1671078623588675  | 7.2124522263586623  | 17.4749193634185893 | Si23 |
| 2.6910906304336737  | 1.5917724474473520  | 12.0606364428313899 | Si24 |
| 4.5042471889106128  | 10.9231318987103183 | 15.1392774375062924 | Si25 |
| 11.7050318868649690 | 1.5522359619466957  | 12.0311795437840434 | Si26 |
| -4.4997490504194735 | 10.9257017540869512 | 15.1493262806437539 | Si27 |
| 7.2355950515592387  | 9.3306400737483361  | 12.0479975781140727 | Si28 |
| -0.0279825586446203 | 3.1408379169601028  | 15.1508651382872372 | Si29 |
| 4.5145117322317727  | 10.9159531064191917 | 12.0156186506977125 | Si30 |
| 2.6872436264681983  | 1.5688553888993970  | 15.1603820763162123 | Si31 |
| -4.5133847817149011 | 10.9529661136137442 | 12.0358740798257902 | Si32 |

---

|                     |                     |                     |      |
|---------------------|---------------------|---------------------|------|
| 11.7076655794100493 | 1.5490222577658559  | 15.1585553425096240 | Si33 |
| -0.0313192232734851 | 3.1732864016850586  | 12.0394872888771740 | Si34 |
| 7.2223062911331812  | 9.3437396446916008  | 15.1704694744366098 | Si35 |
| -1.4838676016128662 | 12.4715742127587834 | 5.0378414830776856  | Si36 |
| 8.6887024327220406  | 0.1154838041124911  | 22.1330316609536020 | Si37 |
| -2.8633663978875621 | 4.9886916976206601  | 5.0665972553437877  | Si38 |
| 10.0931536414884455 | 7.4957430196556194  | 22.1655930564705272 | Si39 |
| 4.3044747890256172  | 7.5446526479695519  | 5.0545634235618184  | Si40 |
| 3.0062340989732217  | 4.9798929624803678  | 22.1582194938905310 | Si41 |
| 8.8697790012463873  | 0.0368930813834696  | 5.1166946586432953  | Si42 |
| -1.6781928133852890 | 12.4652036439153466 | 22.0508834053991016 | Si43 |
| 9.9523725294012131  | 7.6883127642968141  | 5.1334500635102103  | Si44 |
| -2.6668862207857349 | 4.8310582555028070  | 22.0609735540113263 | Si45 |
| 2.7899248941510919  | 4.7857218319761339  | 5.1276038956941745  | Si46 |
| 4.3368505740317849  | 7.7834416440146708  | 22.0206765948340930 | Si47 |
| -1.5296341896388324 | 12.4045478992459977 | 8.2608158650765180  | Si48 |
| 8.7424563638985404  | 0.1028409962999828  | 18.9188491912502457 | Si49 |
| -2.7824884092412834 | 4.9878982473833284  | 8.2857396822104405  | Si50 |
| 9.9967130308104934  | 7.5082334505002652  | 18.9462472229734828 | Si51 |
| 4.2702050606069637  | 7.6214140631595342  | 8.2741114075116009  | Si52 |
| 2.9642730133161552  | 4.8928058187870187  | 18.9329321957828363 | Si53 |
| 8.8204172977688717  | 0.0951945506493145  | 8.3449617843113266  | Si54 |
| -1.6219322076305982 | 12.3998567639346486 | 18.8302413029547466 | Si55 |
| 9.9244269724437650  | 7.6211425299517934  | 8.3580064912420458  | Si56 |
| -2.7119910390014792 | 4.8666527004678235  | 18.8431362108751905 | Si57 |
| 2.8643292194305161  | 4.8022471449868718  | 8.3515460209234771  | Si58 |
| 4.3363032118129690  | 7.7010181469870238  | 18.7983831018441236 | Si59 |
| 7.2000925115408059  | 4.1673323892487462  | 2.5844256519569435  | Si60 |
| -0.0276696466579889 | 8.3130857507610294  | 24.5977637509849458 | Si61 |
| -0.0105591340108946 | 8.3285912838457978  | 2.6215373575937533  | Si62 |
| 7.1593136658229319  | 4.1106955361027486  | 24.6397426272622546 | Si63 |
| 7.1990005242529662  | 4.1622568585635786  | 6.3257010801931282  | Si64 |
| -0.0188420635167903 | 8.3486834418708202  | 20.8509897563907742 | Si65 |
| -0.0134900904287809 | 8.3425838003512371  | 6.3651283959295553  | Si66 |
| 7.1689042121536870  | 4.1559069397217359  | 20.8187253369649028 | Si67 |
| 7.1950901381054280  | 4.1509232459889134  | 9.5549390120450823  | Si68 |
| -0.0027227034069286 | 8.3228135316717342  | 17.6215219119247699 | Si69 |
| -0.0247582694131943 | 8.3632215986509983  | 9.5954701591885065  | Si70 |
| 7.1996044476417378  | 4.1326915046843444  | 17.5918692250717115 | Si71 |
| 7.1410540892529726  | 6.5406783122333856  | 22.7625088202565173 | All  |
| 7.8231398102618552  | 4.5792849308639827  | 0.4565350384286969  | H1   |
| -0.0218804999411368 | 9.0198497927541350  | 0.4747960651902206  | H2   |
| -0.1146960470013703 | 9.0295601900084108  | 26.7340082843767206 | H3   |
| 6.6784023843694902  | 4.5125242705881838  | 26.7941702523698488 | H4   |

|                     |                     |                     |     |
|---------------------|---------------------|---------------------|-----|
| 7.4754154097439764  | 9.2060318772886394  | 20.7271077709646470 | H5  |
| 5.9026838506197006  | 10.0572060076678813 | 20.6655164010437069 | H6  |
| 7.3194863130362915  | 10.8604366543429158 | 21.3707355077238574 | H7  |
| 5.7398859407208915  | 9.9858198287331614  | 23.1672754156487493 | H8  |
| 7.3890110501974888  | 9.2856909792365787  | 23.2670194183087844 | H9  |
| 2.2929408494437680  | 0.1012834816899594  | 23.0207568677117109 | H10 |
| 2.5849163297587570  | 0.6202806418709262  | 20.6061920428910064 | H11 |
| 0.6712587086382529  | 1.5016779622243741  | 19.2794316552020426 | H12 |
| 12.8932773525502817 | 1.8636741083951209  | 20.3724148604984379 | H13 |
| 12.6017652092673433 | 1.3568844405293987  | 22.7895089212815591 | H14 |
| 0.0842880077325590  | 0.4697262478118402  | 24.1159809505128422 | H15 |
| 6.8075374114604772  | 9.8924434461973831  | 21.2653156080889545 | C1  |
| 6.4911254244571266  | 9.3798237799090636  | 22.6472509166000897 | C2  |
| 1.4492867400760074  | 0.4785617464947716  | 22.4406455359149035 | C3  |
| 1.6139754199224610  | 0.7709909680563382  | 21.0826852837183125 | C4  |
| 0.5388748438287497  | 1.2660295543585789  | 20.3380184047842185 | C5  |
| -0.7021977237493533 | 1.4681623332765814  | 20.9507923143659873 | C6  |
| 13.5657146224157259 | 1.1789130396470007  | 22.3087014470763343 | C7  |
| 0.2088893908989004  | 0.6847750619701614  | 23.0522160443192092 | C8  |

TS2

|                     |                     |                     |     |
|---------------------|---------------------|---------------------|-----|
| 7.1073454927770516  | 4.1357937194937957  | 0.9842030535235827  | O1  |
| 0.0357907377705287  | 8.1880910133013955  | 1.0180125485584333  | O2  |
| 5.8236790106254848  | 3.4154458525162013  | 3.1298232656710812  | O3  |
| 1.3600920526216651  | 9.0264408110378511  | 24.0674959318242188 | O4  |
| 8.5041366180387428  | 3.2920964306065219  | 3.1228582591372493  | O5  |
| -1.2809811957585708 | 9.1719569172619373  | 24.0655351933504242 | O6  |
| 7.2925592988879959  | 5.6553887591085292  | 3.2006949005160634  | O7  |
| -0.0826928209704971 | 6.7690011178186538  | 24.0629294361491262 | O8  |
| 1.2073312136498444  | 9.2405243408539359  | 3.2060834943280025  | O9  |
| 5.9971558244098215  | 3.0662467864209697  | 24.0851560999779295 | O10 |
| -1.4353241238174914 | 8.9408935748376148  | 3.1407473650283415  | O11 |
| 8.6086651421743330  | 3.5060225178710556  | 24.0766656453247911 | O12 |
| 0.1517868550517720  | 6.7831473611786155  | 3.2085816662530244  | O13 |
| 6.8816082616350940  | 5.5874207511244984  | 24.1388580948938554 | O14 |
| 4.9757448493762242  | 1.2595423166665585  | 4.4438999659774074  | O15 |
| 2.1283403310783227  | 11.2589306211271136 | 22.8276936269657824 | O16 |
| 10.8038926662191930 | 3.6675420955841043  | 4.4230903981286884  | O17 |
| -3.6012308658952801 | 8.8828176125386875  | 22.7811113375916996 | O18 |
| 5.8108014454318200  | 7.4895207336756506  | 4.4448995180333135  | O19 |
| 1.4289851464457497  | 4.9845785090773749  | 22.7815959596777731 | O20 |
| 2.4045825442085142  | 11.1748791932070954 | 4.5814432602125557  | O21 |
| 4.6821348130372638  | 1.2917578529728886  | 22.6128711273675798 | O22 |
| -3.7045555879326439 | 8.9650803991033143  | 4.5399703003737075  | O23 |
| 10.9025753436576878 | 3.5656120075594662  | 22.7207894706720950 | O24 |



---

|                     |                     |                     |     |
|---------------------|---------------------|---------------------|-----|
| 1.2491842789920109  | 4.7785664846717806  | 4.5717942004093572  | O25 |
| 5.9161027839361875  | 7.8973769997372250  | 22.6222468216248025 | O26 |
| -1.1938010147336533 | 4.7932001438945937  | 22.6490446275429633 | O27 |
| 8.4463893284762648  | 7.6398294108370957  | 4.5451711937549906  | O28 |
| -2.3509557650546542 | 11.1843468311743592 | 22.7129495458993134 | O29 |
| 9.6050017738572215  | 1.3126432843744893  | 4.5229640400073308  | O30 |
| 3.6166369786013668  | 9.1009732220622155  | 22.6713006677549700 | O31 |
| 3.5448392814412362  | 3.4800771524047529  | 4.5130973417245004  | O32 |
| 8.6547600667099136  | 7.4759785267629759  | 22.8742546334638774 | O33 |
| -1.3801998108125568 | 5.0099701618406058  | 4.4644781887967619  | O34 |
| 9.4657850989779408  | 1.3637502905401349  | 22.7356675752679571 | O35 |
| -2.2056413220016706 | 11.1397506763654359 | 4.4278900548633970  | O36 |
| 3.7396460341166065  | 3.7524522104455720  | 22.8282354073982567 | O37 |
| 3.5255336213120083  | 8.7850017742560347  | 4.4479145737332670  | O38 |
| 5.8684309019453034  | 3.3713401619433556  | 5.8029992369709218  | O39 |
| 1.2987630133917794  | 9.1675605293933895  | 21.3864917468276481 | O40 |
| 8.5424548223352712  | 3.3970751257515501  | 5.7975339184115429  | O41 |
| -1.3546581252394883 | 9.0890499843191890  | 21.3844865236853181 | O42 |
| 7.1820778704764781  | 5.7014159438384340  | 5.8730711063627368  | O43 |
| 0.0482710078845612  | 6.7979625322332318  | 21.3959400065181526 | O44 |
| 1.2953553214637994  | 9.1328858757403104  | 5.8776963237287188  | O45 |
| 5.9480472736966554  | 3.2412527154034878  | 21.3913855354458988 | O46 |
| -1.3772347920592063 | 9.0142069256591473  | 5.8173845428014763  | O47 |
| 8.6048773260270970  | 3.4932625842984319  | 21.3832006469591853 | O48 |
| 0.0593729516838981  | 6.7612108672635554  | 5.8829537560794636  | O49 |
| 7.0485400935142888  | 5.6888754511354138  | 21.2793842857816742 | O50 |
| 7.2062758990210307  | 4.0818036086238738  | 7.9493565816356355  | O51 |
| -0.0011320336668730 | 8.3279797319471047  | 19.2623140485557087 | O52 |
| -0.0615180284566064 | 8.3416036562203502  | 7.9894896036469429  | O53 |
| 7.2083118829882498  | 3.9878409087668789  | 19.2327340796947261 | O54 |
| -1.6128876756606125 | 12.4443402449907303 | 6.6705617602453504  | O55 |
| 1.6589178715873336  | 12.4826410918664514 | 20.5320461788495123 | O56 |
| 11.6155386321932497 | 4.7934788613127415  | 6.6927161256346723  | O57 |
| 9.9940537099283908  | 7.6963934980752331  | 20.5730722368902725 | O58 |
| 4.3979618970499477  | 7.6424340664446966  | 6.6878342383469551  | O59 |
| 2.8829416668072239  | 4.8549527678555036  | 20.5692467854770875 | O60 |
| 8.9380607174079660  | 0.0344951726699366  | 6.7578739179438303  | O61 |
| -1.8351863497520746 | 12.4266543796248961 | 20.4380177405156616 | O62 |
| 9.8977700886311109  | 7.7888356391577593  | 6.7703333925161875  | O63 |
| 11.7374139829493824 | 4.6604406855621354  | 20.4649082047337671 | O64 |
| 2.7414186245528551  | 4.6543880710904011  | 6.7628038720494859  | O65 |
| 4.3518004454161865  | 7.8677756401291505  | 20.4525114600800606 | O66 |
| 0.0886048396809311  | 12.4826321465667398 | 4.6497041326183615  | O67 |
| 7.0904937547385467  | 0.1433165744583263  | 22.4851881379145944 | O68 |

---

---

|                     |                     |                     |      |
|---------------------|---------------------|---------------------|------|
| 10.7419944979577071 | 6.3132964697945910  | 4.7120218193165337  | O69  |
| -3.4033882384586187 | 6.2403192740477804  | 22.5104443425704197 | O70  |
| 3.5343021443460505  | 6.1329075866221592  | 4.6927701356610996  | O71  |
| 3.6570160562326710  | 6.4209767564978844  | 22.5702262823467095 | O72  |
| 0.0093102231328919  | 12.4745268230692528 | 8.7855097100012536  | O73  |
| 7.1746982199774063  | 0.0144005678313890  | 18.4676515731574398 | O74  |
| 10.7818277775584654 | 6.2639843930510821  | 8.7608841552308885  | O75  |
| 10.8301850054282376 | 6.2206395976446114  | 18.4974300057786962 | O76  |
| 3.5706817366243135  | 6.1933997671786338  | 8.7669795086294435  | O77  |
| 3.6230248332119581  | 6.2756248927339673  | 18.4386288467431179 | O78  |
| 4.8043934977747424  | 1.1138491864805622  | 8.8742243040075284  | O79  |
| 2.3639924698270844  | 11.3556113176878632 | 18.2853530717293644 | O80  |
| 11.0026769075606410 | 3.6024642876827229  | 8.9368175251870081  | O81  |
| -3.8131035728902400 | 8.8861016214348805  | 18.3349367675366004 | O82  |
| 5.7551422112607780  | 7.7353787428279297  | 8.9282392959969670  | O83  |
| 1.4161286708883791  | 4.7507515251749028  | 18.3953855700850255 | O84  |
| 2.4192387194706049  | 11.3243529543743850 | 9.0005606795661297  | O85  |
| 4.7635151360110033  | 1.1497352912953906  | 18.1864186643376726 | O86  |
| -3.8583579320156605 | 8.9186773914351036  | 9.0530607935028904  | O87  |
| 11.0206982277302838 | 3.5673837419633370  | 18.1750218741213629 | O88  |
| 1.3608181407859807  | 4.7034649106954740  | 9.0138910182879162  | O89  |
| 5.8269759027940475  | 7.7973085966150446  | 18.2582747086676598 | O90  |
| -1.2196475613038600 | 5.0216914531126253  | 18.3234358891565385 | O91  |
| 8.3916527493855160  | 7.4375505589726663  | 8.9005529975139659  | O92  |
| -2.2383486248767275 | 11.0181986241047394 | 18.2632740924803159 | O93  |
| 9.4440941979128148  | 1.4566945316568225  | 8.9104001837197551  | O94  |
| 3.4504622453596241  | 8.9352514153033198  | 18.2519529897046091 | O95  |
| 3.7290664621056173  | 3.5360394794294114  | 8.9220804940734588  | O96  |
| 8.4339396910991571  | 7.4119793134502245  | 18.4937162352396562 | O97  |
| -1.2494354069212594 | 5.1082774109671485  | 8.7644770832626495  | O98  |
| 9.3948665326052598  | 1.4979059528153988  | 18.4645330051043324 | O99  |
| -2.1950504658929013 | 10.9671401031106743 | 8.7465169991620009  | O100 |
| 3.8066139667241221  | 3.6057003627068531  | 18.4687640079764712 | O101 |
| 3.3544479234001345  | 8.8527235909822917  | 8.7575918674991815  | O102 |
| 6.0644462504176655  | 3.0917869405645400  | 10.1287340711585951 | O103 |
| 1.0935258361281708  | 9.3528771217689215  | 17.0752991811891199 | O104 |
| 8.6374170632554659  | 3.6775370114098642  | 10.1467965259090818 | O105 |
| -1.4702193176750797 | 8.7437754502195943  | 17.0910196925169764 | O106 |
| 6.8448706844936922  | 5.6129820558415329  | 10.0877088230400425 | O107 |
| 0.3392115894032544  | 6.8183640693640744  | 17.1093590818336843 | O108 |
| 1.1368865543550077  | 9.3113008046402452  | 10.1581434865074147 | O109 |
| 6.0079323526838744  | 3.1929041916016438  | 17.0078785386853610 | O110 |
| -1.4615505345412054 | 8.8479042780987189  | 10.1875868518005710 | O111 |
| 8.6188606841454813  | 3.6156220694237198  | 17.0216995875092003 | O112 |

---

---

|                     |                     |                     |      |
|---------------------|---------------------|---------------------|------|
| 0.2445697901392618  | 6.8277997099256069  | 10.1491373071782558 | O113 |
| 6.9395839732835540  | 5.6506269083661023  | 17.1547289737099611 | O114 |
| 3.8994511862511665  | 2.0846520261372454  | 11.1581871335908716 | O115 |
| 3.2457436794261625  | 10.3504519462543119 | 16.0085817290549919 | O116 |
| 10.5784869907052190 | 2.2871161686051575  | 11.1830744339312993 | O117 |
| -3.4059860815204219 | 10.1243301173465614 | 16.0383200198803770 | O118 |
| 7.1116053094082945  | 7.9505226721021938  | 11.1887220819126387 | O119 |
| 0.1397614036459283  | 4.4241599470989224  | 16.1048400211821630 | O120 |
| 3.4549702712005024  | 10.0649275239507823 | 11.1136195119448757 | O121 |
| 3.6766776506511705  | 2.4150392673239822  | 16.1125517638404325 | O122 |
| -3.2696614508130337 | 10.4998665768539841 | 11.1208201120657524 | O123 |
| 10.4463914521993075 | 1.9937034191128304  | 16.0949997359572734 | O124 |
| -0.2472425029977998 | 4.4582321063562418  | 11.1310270037481782 | O125 |
| 7.4147417561069169  | 8.0104430812019132  | 16.1241417540583747 | O126 |
| 2.3404030313223356  | 0.0118364626332595  | 11.7927944709919643 | O127 |
| 4.8168179466702732  | 12.4425084799853565 | 15.4841786367300536 | O128 |
| 13.1726499260522463 | 2.0973748871551621  | 11.7968452150367717 | O129 |
| 8.4309415964581547  | 10.3866909286794087 | 15.4795559195808252 | O130 |
| 6.0180047513656501  | 10.3121724869744611 | 11.7669944597598324 | O131 |
| 1.1380085571324194  | 2.0496087347395040  | 15.4175772075658735 | O132 |
| 4.4797207543119963  | 12.4437059231778608 | 11.6176031037567160 | O133 |
| -4.4462356510814294 | 12.4968270612771164 | 15.5657234494394903 | O134 |
| 8.6195432230246745  | 10.0556324576819769 | 11.6492923967951150 | O135 |
| 12.9829731236522292 | 2.3985992680367278  | 15.5471309340392114 | O136 |
| 1.3465307280955794  | 2.4365895463884661  | 11.6911991987085262 | O137 |
| 5.8224301869931132  | 10.0263383844469871 | 15.5457649969440972 | O138 |
| 3.0924701474799496  | 1.8083929633288029  | 13.6237236985031576 | O139 |
| 4.1154321736613477  | 10.6813069764161295 | 13.5849967440668156 | O140 |
| 11.2681458979209470 | 1.6770747452524668  | 13.6203913717308716 | O141 |
| -4.1177490535140153 | 10.7081407910641087 | 13.6011862183445391 | O142 |
| 7.2733572832815074  | 8.8558682418514234  | 13.6326767076889031 | O143 |
| -0.0630360609010818 | 3.6312924337084458  | 13.6206637471240679 | O144 |
| -0.0115084095458808 | 8.2036209134305391  | 26.2338092027480840 | O145 |
| 7.2522602786156343  | 3.9543413505226623  | 26.2719835705131857 | O146 |
| 5.0556440813851102  | 2.8816058954801909  | 4.4634454049162766  | Si1  |
| 2.0858643969502397  | 9.6357838000347531  | 22.7449021202752526 | Si2  |
| 9.3617775872532185  | 2.9193720955291607  | 4.4584762570789245  | Si3  |
| -2.1423112939342559 | 9.5708691007065436  | 22.7412695685319015 | Si4  |
| 7.1808387891069447  | 6.6189338854530018  | 4.5089703604835636  | Si5  |
| 0.0491066064563235  | 5.8387071107501702  | 22.7316659106270151 | Si6  |
| 2.1090774379083053  | 9.5766989930016901  | 4.5215383870161316  | Si7  |
| 5.1087891541136514  | 2.8713179701065199  | 22.7448741225224325 | Si8  |
| -2.1758183392222539 | 9.5167199957078825  | 4.4750623821620383  | Si9  |
| 9.3696045273567581  | 2.9998374661587457  | 22.7414112230102710 | Si10 |

---

|                     |                     |                     |      |
|---------------------|---------------------|---------------------|------|
| 0.0154864506618737  | 5.8358919936863645  | 4.5253987804088442  | Si11 |
| 4.6127883049743374  | 2.4633209360476322  | 9.7574453132769516  | Si12 |
| 2.5456112195135061  | 9.9918878378682532  | 17.4215085015038689 | Si13 |
| 9.9148531491336644  | 2.7426968006791990  | 9.7807128247155219  | Si14 |
| -2.7307773242185429 | 9.7047986141741340  | 17.4474974060262369 | Si15 |
| 7.0383370974349564  | 7.1913465671484920  | 9.7617400287260931  | Si16 |
| 0.1563494247684027  | 5.2505918303018086  | 17.4955838280159099 | Si17 |
| 2.5983178377767908  | 9.8931143868634948  | 9.7483350690434243  | Si18 |
| 4.5684550971126008  | 2.5891570759308751  | 17.4550635402617402 | Si19 |
| -2.7035766694528878 | 9.8104804838582496  | 9.7673250129228162  | Si20 |
| 9.8715193702511179  | 2.6741739880344166  | 17.4500142086882448 | Si21 |
| 0.0283881066223963  | 5.2662530450870664  | 9.7535860355802413  | Si22 |
| 7.1541094478744975  | 7.2153160979497688  | 17.5163694153031386 | Si23 |
| 2.6680713290367746  | 1.5800183938691070  | 12.0699345840062549 | Si24 |
| 4.5039915279610820  | 10.8813874838919364 | 15.1494453145461883 | Si25 |
| 11.6847670524925640 | 1.5041309718104656  | 12.0589287240187542 | Si26 |
| -4.5001980420236043 | 10.9262368160690961 | 15.1656217749901803 | Si27 |
| 7.2488620221418678  | 9.2976535196112540  | 12.0673496556152493 | Si28 |
| -0.0538661470956623 | 3.1258382705504424  | 15.1672947394333040 | Si29 |
| 4.5182695849033747  | 10.8751538490652173 | 12.0235614109575515 | Si30 |
| 2.6714083368378967  | 1.5669757627533918  | 15.1754749593027487 | Si31 |
| -4.5202342090364835 | 10.9461577009406916 | 12.0446265742064096 | Si32 |
| 11.6840924755646220 | 1.5022120079891172  | 15.1811976648433440 | Si33 |
| -0.0575205572087405 | 3.1531443828124557  | 12.0649330422508871 | Si34 |
| 7.2373518551409122  | 9.3191635158919937  | 15.1913372632651953 | Si35 |
| -1.4900072814457790 | 12.4552896017532184 | 5.0599643579661686  | Si36 |
| 8.6796093057049344  | 0.0767858579666865  | 22.1357482722226138 | Si37 |
| 11.5537882684496260 | 4.9508782941683966  | 5.0855181352721361  | Si38 |
| -4.3441414807951881 | 7.5444044881564691  | 22.1946184720863116 | Si39 |
| 4.3130721104974086  | 7.5102296198383200  | 5.0796084474071490  | Si40 |
| 2.9426180475886192  | 5.0071297357813878  | 22.1809267603506832 | Si41 |
| 8.8618015858264449  | 0.0024941493555254  | 5.1417974677486802  | Si42 |
| 5.5244216529020473  | 0.0165567601108699  | 22.0500691811748055 | Si43 |
| 9.9555053210443241  | 7.6710217132146203  | 5.1569519023977914  | Si44 |
| -2.7256873877839030 | 4.8287128722587971  | 22.0819152511643857 | Si45 |
| 2.7721241080196628  | 4.7648544132052306  | 5.1482362770684800  | Si46 |
| 4.4006034199912740  | 7.7878382880665100  | 22.0757376600530257 | Si47 |
| -1.5434366035482876 | 12.3783211551140653 | 8.2829367242025338  | Si48 |
| 8.7403047374224538  | 0.0889772282336114  | 18.9249684452027971 | Si49 |
| -2.7952103776186217 | 4.9508473293962734  | 8.3008700591384379  | Si50 |
| 9.9805727957120567  | 7.5353001582207373  | 18.9739789461087511 | Si51 |
| 4.2674945191929305  | 7.5946353894121099  | 8.2971952736525196  | Si52 |
| 2.9373475705572769  | 4.8851208404896962  | 18.9572044657987462 | Si53 |
| 8.8047772210659616  | 0.0687160276244726  | 8.3701291092061894  | Si54 |

|                                    |                     |                     |      |
|------------------------------------|---------------------|---------------------|------|
| -1.6296105835915373                | 12.4081623675062751 | 18.8327307058632947 | Si55 |
| 9.9177451711099458                 | 7.5967314117594036  | 8.3778965362340294  | Si56 |
| -2.7452137209323291                | 4.8800227762538171  | 18.8633002190031256 | Si57 |
| 2.8503109152579809                 | 4.7810323480030119  | 8.3721256532848400  | Si58 |
| 4.3142223519042133                 | 7.6992533496917392  | 18.8481697363061222 | Si59 |
| 7.1925682340008237                 | 4.1313291643980827  | 2.6068499680826629  | Si60 |
| -0.0067342493319833                | 8.3014898398004249  | 24.6118072158729184 | Si61 |
| -0.0106314603961817                | 8.3013392770647521  | 2.6383713276485632  | Si62 |
| 7.1730234014709566                 | 4.0902092328937885  | 24.6430596144567389 | Si63 |
| 7.1993524767929546                 | 4.1392588144002023  | 6.3466183593736796  | Si64 |
| -0.0054581547404657                | 8.3385516736840852  | 20.8666700534361489 | Si65 |
| -0.0200149389122002                | 8.3119644550589804  | 6.3854729302519768  | Si66 |
| 7.1981730329358253                 | 4.1576043622748609  | 20.8455585377544033 | Si67 |
| 7.1876441558087674                 | 4.1178671084575402  | 9.5745493583600805  | Si68 |
| -0.0097776500892346                | 8.3096487852903085  | 17.6381492598884009 | Si69 |
| -0.0348424352489358                | 8.3317643061803839  | 9.6161713315691735  | Si70 |
| 7.1948087135706018                 | 4.1190638692160730  | 17.6241755081832281 | Si71 |
| 7.1477540593635700                 | 6.6225496025271253  | 22.7666078797674416 | All  |
| 7.8293592264899114                 | 4.5450193636837479  | 0.4836818829054271  | H1   |
| -0.0092329481195392                | 9.0024951963688409  | 0.4945284596269123  | H2   |
| -0.0462561967260191                | 9.0257097000163480  | 26.7459923083013429 | H3   |
| 6.8483460813122781                 | 4.6756930822363252  | 26.7773954583361373 | H4   |
| 7.2091647728862380                 | 9.1282543055924972  | 20.4887301038040199 | H5   |
| 6.0028186170197726                 | 10.4402010363263997 | 20.2463669530946433 | H6   |
| 7.7521078761304993                 | 10.7865883125139579 | 20.5069979406063929 | H7   |
| 5.7582409551354932                 | 10.2833108889994591 | 22.7186664320604912 | H8   |
| 7.5514587063709326                 | 9.8109387409792888  | 22.8872044105235695 | H9   |
| -5.0765515068821774                | 12.2153040032974918 | 23.0297856870708735 | H10  |
| 2.3995689528866011                 | 0.9933455174119022  | 20.9163106908131766 | H11  |
| 0.3939241196911520                 | 1.8881819864740359  | 19.7442765732025727 | H12  |
| 12.5483547120986270                | 1.5320404499350821  | 20.6856443321921795 | H13  |
| 12.2723849932284512                | 0.2626415892308838  | 22.8059928546948747 | H14  |
| 7.0773428560578591                 | 11.9342310866952488 | 24.0277880025782089 | H15  |
| 6.9012175943799718                 | 10.1443881059493695 | 20.7968813607463581 | C1   |
| 6.7268527173720383                 | 10.1329439585806842 | 22.2496258051203846 | C2   |
| 1.2589961625360750                 | 0.0893251984629249  | 22.5048235087341126 | C3   |
| 1.4037357198988798                 | 0.8010280655254168  | 21.3195083351792398 | C4   |
| 0.2697026977269885                 | 1.3079782289861370  | 20.6619549750304579 | C5   |
| 13.4207410477634479                | 1.1087269280982048  | 21.1868507199865306 | C6   |
| 13.2665716260273889                | 0.3958946312596254  | 22.3729721808097324 | C7   |
| 7.1844012350792941                 | 12.3569808430235462 | 23.0265601094093952 | C8   |
| Protonated ethylbenzene adsorption |                     |                     |      |
| 7.0995685967444215                 | 4.1104253284930401  | 0.9851235921702908  | O1   |
| 0.0206540193339153                 | 8.1841837853811459  | 1.0160780733421428  | O2   |

---

|                     |                     |                     |     |
|---------------------|---------------------|---------------------|-----|
| 5.8126658345410869  | 3.4120476133770490  | 3.1355255764670202  | O3  |
| 1.3299417612354789  | 8.9726006915491325  | 24.0780282942761197 | O4  |
| 8.4919626659405036  | 3.2785206039694526  | 3.1321772706564568  | O5  |
| -1.3134255297268287 | 9.0716546344830107  | 24.0593343169292098 | O6  |
| 7.2893440418109599  | 5.6476308557367041  | 3.1878362289515656  | O7  |
| -0.0703759122270395 | 6.6898740698543619  | 24.0903898599308377 | O8  |
| 1.2018467054917146  | 9.2182798926764740  | 3.2069486184204581  | O9  |
| 5.9257176407180712  | 3.0542930679969649  | 24.0908688387047718 | O10 |
| -1.4412802173667347 | 8.9341500623422316  | 3.1472284403092923  | O11 |
| 8.5555253804246032  | 3.2458466902112613  | 24.1086613212245702 | O12 |
| 0.1288689466104551  | 6.7652124369936830  | 3.1975137235014501  | O13 |
| 7.0628704566696623  | 5.4856696246743581  | 24.2328047073755037 | O14 |
| 4.9729917659013694  | 1.2499035725693921  | 4.4438338152356884  | O15 |
| 2.0927912610734758  | 11.1794212005731683 | 22.8111198328260585 | O16 |
| 10.7931093130793574 | 3.6526346673261343  | 4.4306662135697223  | O17 |
| -3.6366614080416317 | 8.9114038567187706  | 22.7600308907163154 | O18 |
| 5.8093408432903608  | 7.4777289681357137  | 4.4396033955963450  | O19 |
| 1.3122582042673656  | 4.8251875978306789  | 22.7453954878979054 | O20 |
| 2.3987390652702514  | 11.1590066001544646 | 4.5771255310173764  | O21 |
| 4.6680178263672243  | 1.2519621837425803  | 22.5990118601846959 | O22 |
| -3.7057194154103037 | 8.9504355844271615  | 4.5515184064098095  | O23 |
| 10.8201955887241841 | 3.5699243662273448  | 22.7466331360292635 | O24 |
| 1.2435936957419762  | 4.7700660608158714  | 4.5589005482037797  | O25 |
| 5.7986007620185891  | 7.6593956666130030  | 22.8228234169315698 | O26 |
| -1.2897620871975786 | 4.7620230767614808  | 22.6954346425078484 | O27 |
| 8.4466011725826569  | 7.6251030325243176  | 4.5365455504808363  | O28 |
| -2.2878112512018278 | 11.1558161351432492 | 22.7324549411262709 | O29 |
| 9.5964496916486901  | 1.2970607203006690  | 4.5274847461948573  | O30 |
| 3.5935123237371895  | 9.0279238630825525  | 22.6791062333256335 | O31 |
| 3.5346727474237434  | 3.4649715933487810  | 4.5200716095855933  | O32 |
| 8.6105078630209597  | 7.5141774315146153  | 22.8873413579994676 | O33 |
| -1.3867126484954526 | 4.9863498975055638  | 4.4708360004487293  | O34 |
| 9.5719827078111415  | 1.2607174456678609  | 22.6577989630612429 | O35 |
| -2.2170689561555115 | 11.1303001248870395 | 4.4332091810719083  | O36 |
| 3.6591866864807758  | 3.6828935737645980  | 22.8322593582461337 | O37 |
| 3.5238815685322722  | 8.7710091855530514  | 4.4411452061272092  | O38 |
| 5.8584181020218011  | 3.3611854154315659  | 5.8086243375078581  | O39 |
| 1.2766143974179238  | 9.0751813647526181  | 21.3939577270947545 | O40 |
| 8.5329726329952695  | 3.3774122665110475  | 5.8068561048711205  | O41 |
| -1.3770292250014959 | 9.0384647598733316  | 21.3785063799611734 | O42 |
| 7.1803946848255986  | 5.6855386591426873  | 5.8611559529263015  | O43 |
| -0.0106413942297734 | 6.7257096634216786  | 21.4185661854607261 | O44 |
| 1.2978530245602755  | 9.1163190925757913  | 5.8784256171807314  | O45 |
| 5.8699200109447842  | 3.2513777033863627  | 21.3893994832910295 | O46 |

---

---

|                     |                     |                     |     |
|---------------------|---------------------|---------------------|-----|
| -1.3746380897665205 | 9.0113270117448288  | 5.8249218284926121  | O47 |
| 8.5333747528917225  | 3.3438393498255841  | 21.4012388263199291 | O48 |
| 0.0508445672347078  | 6.7501719541811012  | 5.8711466424282284  | O49 |
| 7.1179514145291432  | 5.6303379484864458  | 21.3677580377640659 | O50 |
| 7.1953303900746528  | 4.0831174073390439  | 7.9511845643248522  | O51 |
| -0.0290397693146369 | 8.2317842162960329  | 19.2738258485979657 | O52 |
| -0.0538637805605324 | 8.3104449414305748  | 7.9885270337904837  | O53 |
| 7.1877450344189358  | 3.9976235338013830  | 19.2648056331617923 | O54 |
| -1.6175319657667746 | 12.4377599283322517 | 6.6721550688608469  | O55 |
| 8.8601880971453806  | -0.1223592296006226 | 20.4957436216909663 | O56 |
| -2.8248250190204183 | 4.7706949880423259  | 6.7020876601281980  | O57 |
| 9.9660502192205982  | 7.7061868623210517  | 20.5665126851378126 | O58 |
| 4.3941786698022645  | 7.6268172863262507  | 6.6813391781094289  | O59 |
| 2.7908091647281594  | 4.7050490440899564  | 20.5588375184725756 | O60 |
| 8.9304746839468105  | 0.0083726965902217  | 6.7589178368613796  | O61 |
| -1.7997552764005746 | 12.3882432368046622 | 20.4426004315743910 | O62 |
| 9.8805223929147523  | 7.7667167284350338  | 6.7721749278210952  | O63 |
| -2.7561457140202097 | 4.6432175816073951  | 20.4978753623156358 | O64 |
| 2.7163757493008442  | 4.6524534632402146  | 6.7605485977529369  | O65 |
| 4.4287644392115091  | 7.7596710549793642  | 20.5140837223315167 | O66 |
| 7.2986803118227872  | -0.0350362426866010 | 4.6497779196620073  | O67 |
| 7.1187305736926474  | 0.1795923635465880  | 22.4802398681497309 | O68 |
| 10.7419174382414635 | 6.2976866895553147  | 4.7201758051748888  | O69 |
| -3.4653807724230417 | 6.2600264762858968  | 22.5227675590451817 | O70 |
| 3.5330950058393125  | 6.1174299942670469  | 4.6874528950379934  | O71 |
| 3.4514853362682087  | 6.3683114539491790  | 22.5403172100685154 | O72 |
| 0.0018437169704493  | 12.4613065795957993 | 8.7881392548521777  | O73 |
| 7.1700278998240314  | -0.0207678052318695 | 18.4342516176137536 | O74 |
| 10.7720324960721818 | 6.2456761388715920  | 8.7644458860551513  | O75 |
| -3.6378631909538903 | 6.2037508647574811  | 18.5122165617955154 | O76 |
| 3.5557352583823838  | 6.1848946922551162  | 8.7629887160435409  | O77 |
| 3.5791050509085212  | 6.2318976345453825  | 18.4997236912722087 | O78 |
| 4.7935751210402220  | 1.0991401682711659  | 8.8768095850532003  | O79 |
| 2.3723560160439492  | 11.3419755964696058 | 18.2105718450488148 | O80 |
| 11.0007686380760035 | 3.5858838320497948  | 8.9565524982246458  | O81 |
| -3.8623893073678657 | 8.8613019159901274  | 18.2932250859175305 | O82 |
| 5.7491910118775413  | 7.7144405951875967  | 8.9196119656170563  | O83 |
| 1.3860528921781072  | 4.6817453862284735  | 18.3586500618708328 | O84 |
| 2.4137549822373510  | 11.3150563418749446 | 9.0115281795017523  | O85 |
| 4.7482746093302897  | 1.1019799303574693  | 18.1996282333274451 | O86 |
| -3.8610064403315674 | 8.9013319743188077  | 9.0464230155617589  | O87 |
| 11.0226255323760700 | 3.5427272141674431  | 18.2068425081868419 | O88 |
| 1.3534746440045589  | 4.6854795051675771  | 9.0256869722608730  | O89 |
| 5.7693559236982823  | 7.7588402612489142  | 18.2359001754402570 | O90 |

---

---

|                     |                     |                     |      |
|---------------------|---------------------|---------------------|------|
| -1.2362994982687476 | 5.0175934006911671  | 18.3944888527064592 | O91  |
| 8.3849134243006311  | 7.4211532216037837  | 8.9084062878818422  | O92  |
| -2.2418950555933366 | 10.9666846885438805 | 18.2922645821750898 | O93  |
| 9.4356276147574878  | 1.4461720105128619  | 8.8996648623064836  | O94  |
| 3.3909094896280640  | 8.8891923557854557  | 18.3814871182030046 | O95  |
| 3.7236610221336064  | 3.5256506823645068  | 8.9066311198988952  | O96  |
| 8.3926093524979315  | 7.3767429090618899  | 18.4914539866066860 | O97  |
| -1.2569200829391090 | 5.0954122170965466  | 8.7749506664976735  | O98  |
| 9.3900867096554812  | 1.4702089279678787  | 18.4710684755502754 | O99  |
| -2.2016742238290599 | 10.9533186340371635 | 8.7438686427385406  | O100 |
| 3.7830583491760721  | 3.5603217967985326  | 18.4397949600664148 | O101 |
| 3.3525731984825002  | 8.8453017313169866  | 8.7447919212385408  | O102 |
| 6.0520665728966225  | 3.0783843217333473  | 10.1257344038018111 | O103 |
| 1.0773072186856227  | 9.3015641418904540  | 17.1140323547859730 | O104 |
| 8.6258744575302444  | 3.6600703835198565  | 10.1458287214498153 | O105 |
| -1.4903114395426837 | 8.6952068796681878  | 17.1084787549009825 | O106 |
| 6.8359882069044104  | 5.5983581247367979  | 10.0978645129318672 | O107 |
| 0.3140953242006357  | 6.7695212543750216  | 17.0970104107153951 | O108 |
| 1.1371106837494152  | 9.2914580821902124  | 10.1544729920300600 | O109 |
| 6.0279550357886871  | 3.1358111270862512  | 17.0469566299294293 | O110 |
| -1.4619719239264772 | 8.8308484813392134  | 10.1776741888795446 | O111 |
| 8.6208325730562976  | 3.6201134302136926  | 17.0683945269414608 | O112 |
| 0.2390060360656556  | 6.8087910628675221  | 10.1617843932664176 | O113 |
| 6.8986893138145025  | 5.6178652457213003  | 17.1545516659796569 | O114 |
| 3.8755538709152075  | 2.0843144183187734  | 11.1497172580631521 | O115 |
| 3.2854844050340626  | 10.1544372099553435 | 16.0359485957807948 | O116 |
| 10.5477556096485046 | 2.2491127168921463  | 11.1909615512830243 | O117 |
| -3.3615886828008366 | 10.1388005120066200 | 16.0249986605208470 | O118 |
| 7.0891355277585619  | 7.9413613494740254  | 11.1854905159516349 | O119 |
| 0.0051220954079074  | 4.3825466566098132  | 16.1179156301235125 | O120 |
| 3.4616451312395569  | 10.0294368086606465 | 11.1074726886593940 | O121 |
| 3.7330186767074820  | 2.3598228650792721  | 16.0837095157669765 | O122 |
| -3.2719381957075218 | 10.4733754461803752 | 11.1186828136839644 | O123 |
| 10.4393886179416580 | 2.0228457182428476  | 16.0991487992303277 | O124 |
| -0.2593722482661738 | 4.4369338768936064  | 11.1425657065584218 | O125 |
| 7.3698233119639980  | 7.9760610307361715  | 16.1231399102487174 | O126 |
| 2.3426494939214741  | -0.0107840107717587 | 11.7781492031404156 | O127 |
| 4.6712986354069290  | 12.3783872845852567 | 15.5367543417439062 | O128 |
| 13.1385569737756338 | 2.0784031433703847  | 11.7983422489325118 | O129 |
| 8.4657539158637576  | 10.3193305159946540 | 15.5095252598589557 | O130 |
| 6.0094982360049389  | 10.2928819372226314 | 11.8256374007024263 | O131 |
| 1.1718973798622467  | 2.0833076603352674  | 15.4634198944631862 | O132 |
| 4.4632898962670149  | 12.4098449819516468 | 11.6321511422843269 | O133 |
| -4.4822222563061036 | 12.4764246597831185 | 15.5484791752677847 | O134 |

---



---

|                     |                     |                     |      |
|---------------------|---------------------|---------------------|------|
| -5.8237775881793690 | 10.0411607316628224 | 11.6313922095380935 | O135 |
| 13.0039488799167167 | 2.2580932859261433  | 15.5316961746016613 | O136 |
| 1.3154181399151605  | 2.3984857805576909  | 11.6799599329114248 | O137 |
| 5.8574005383933576  | 10.0486946484885760 | 15.4901156758115697 | O138 |
| 3.0670787653262712  | 1.7925430621889322  | 13.6112700351359646 | O139 |
| 4.0554160565209676  | 10.6422089203931165 | 13.5943858374132631 | O140 |
| 11.2396100453506200 | 1.6322399497500066  | 13.6298490055187678 | O141 |
| -4.1294599929813458 | 10.6849487096498343 | 13.5927164285526434 | O142 |
| 7.3205535467637404  | 8.8145856730210443  | 13.6323390411914005 | O143 |
| -0.0810856074383726 | 3.5811045432279425  | 13.6290222530120371 | O144 |
| -0.0414597996798429 | 8.1425066640702592  | 26.2442043313962898 | O145 |
| 7.1928652680380871  | 3.7581347767123088  | 26.3108382747968825 | O146 |
| 5.0474037233869344  | 2.8719453980237222  | 4.4680268467775983  | Si1  |
| 2.0686610844177880  | 9.5542034832267682  | 22.7477674384501114 | Si2  |
| 9.3514321126861688  | 2.9036908583949321  | 4.4658530832644248  | Si3  |
| -2.1483158769086739 | 9.5327217183544857  | 22.7389376966988763 | Si4  |
| 7.1793057255253760  | 6.6061574202497590  | 4.4999208853973158  | Si5  |
| -0.0128827712785493 | 5.7679707354126011  | 22.7523590799770865 | Si6  |
| 2.1060877562976419  | 9.5603999018245478  | 4.5189664298557428  | Si7  |
| 5.0581520006368592  | 2.8444735856224943  | 22.7460104978858624 | Si8  |
| -2.1792394564554369 | 9.5076188058353761  | 4.4835838454441372  | Si9  |
| 9.3377967466637273  | 2.8830116419332219  | 22.7438655016022011 | Si10 |
| 0.0044805451476835  | 5.8207062531286828  | 4.5176780966383756  | Si11 |
| 4.5992719565016582  | 2.4536119569107271  | 9.7517132459586957  | Si12 |
| 2.5434667439833998  | 9.9135346156000299  | 17.4534149111213495 | Si13 |
| 9.9030303137103743  | 2.7230726472791718  | 9.7850864730835561  | Si14 |
| -2.7421970804971112 | 9.6737551963492159  | 17.4463815776952735 | Si15 |
| 7.0276871452618073  | 7.1751887802587691  | 9.7629868934925543  | Si16 |
| 0.1075732306193937  | 5.2108681701309587  | 17.5007168442725956 | Si17 |
| 2.5970889349894968  | 9.8769762194887267  | 9.7449340893333556  | Si18 |
| 4.5768715736208030  | 2.5390032852597613  | 17.4549068010957598 | Si19 |
| -2.7057625510252743 | 9.7920356499041468  | 9.7615188720599235  | Si20 |
| 9.8664085513196849  | 2.6633521287128343  | 17.4721997087553937 | Si21 |
| 0.0203980025635153  | 5.2475011856238662  | 9.7657904770489239  | Si22 |
| 7.1096707227416678  | 7.1849416785082072  | 17.5170172235084713 | Si23 |
| 2.6494453329859846  | 1.5600260319820389  | 12.0570768929759424 | Si24 |
| 4.4696865581095020  | 10.8108449342093174 | 15.1575226293353005 | Si25 |
| 11.6574916139611826 | 1.4712315675211021  | 12.0676566374309928 | Si26 |
| -4.4920495750800136 | 10.9023382227451506 | 15.1618342906384918 | Si27 |
| 7.2499561581625231  | 9.2769490610597920  | 12.0753544852027961 | Si28 |
| -0.0788462004404205 | 3.0759381026832244  | 15.1758584278710220 | Si29 |
| 4.4991212155953022  | 10.8421520246825409 | 12.0432681217689730 | Si30 |
| 2.6771943321652136  | 1.5505144019810955  | 15.1697459422588317 | Si31 |
| -4.5261014061377001 | 10.9228989838194721 | 12.0350639507096062 | Si32 |

---

|                     |                     |                     |      |
|---------------------|---------------------|---------------------|------|
| 11.6443324328374356 | 1.4467067954546571  | 15.1920771158209948 | Si33 |
| -0.0814504777408966 | 3.1219007152302107  | 12.0665879211972698 | Si34 |
| 7.2526828513436667  | 9.2867657683077383  | 15.1871946808258684 | Si35 |
| -1.4961439600806248 | 12.4449101294772788 | 5.0617257421198900  | Si36 |
| 8.6965508066712367  | 0.0074859904266842  | 22.1016018300109067 | Si37 |
| -2.8855203095476587 | 4.9320374804959854  | 5.0946327934351743  | Si38 |
| 10.0326442728804750 | 7.5728041818898753  | 22.1923153210046316 | Si39 |
| 4.3109457538042664  | 7.4960369559271971  | 5.0737106665812020  | Si40 |
| 2.8381419709489752  | 4.9186356397756050  | 22.1682920790577924 | Si41 |
| 8.8549993427667690  | -0.0157327267179373 | 5.1425028220662385  | Si42 |
| -1.6619101118400321 | 12.4954273698773406 | 22.0526747207562650 | Si43 |
| 9.9512834103545060  | 7.6544364607914543  | 5.1592683500489560  | Si44 |
| -2.8148755135226802 | 4.8372612720066401  | 22.1135233617498308 | Si45 |
| 2.7621523309586564  | 4.7546753774488275  | 5.1455160528579960  | Si46 |
| 4.3652875161835398  | 7.6780995006026247  | 22.1448971359564872 | Si47 |
| -1.5508922528669240 | 12.3664727085668780 | 8.2845719690678568  | Si48 |
| 8.7371907264485884  | 0.0449295348252492  | 18.8909211047983376 | Si49 |
| -2.8020339303507309 | 4.9326630910718841  | 8.3104047125072107  | Si50 |
| 9.9358434524315911  | 7.5237244501662150  | 18.9702651243006528 | Si51 |
| 4.2604667299502132  | 7.5813106493504199  | 8.2904116397470791  | Si52 |
| 2.8991909331460248  | 4.8209063221939878  | 18.9499501040184946 | Si53 |
| 8.7970554174646374  | 0.0533073998672669  | 8.3710839329853304  | Si54 |
| -1.6266199723894097 | 12.3647079033471279 | 18.8331990762525159 | Si55 |
| 9.9089024750987367  | 7.5785949509275294  | 8.3800527824415596  | Si56 |
| -2.7779291033790892 | 4.8730712253752433  | 18.8938776957535133 | Si57 |
| 2.8369340495492477  | 4.7710514380610887  | 8.3700862066353245  | Si58 |
| 4.2960705355861091  | 7.6475756840441038  | 18.9152289952977810 | Si59 |
| 7.1844066301020444  | 4.1185212763938317  | 2.6078874286857503  | Si60 |
| -0.0251236519710032 | 8.2323573671248589  | 24.6215289976821410 | Si61 |
| -0.0223955308450643 | 8.2884428394780709  | 2.6373675706665263  | Si62 |
| 7.1795678454956171  | 3.9563129342860401  | 24.6850822600955055 | Si63 |
| 7.1914387256496211  | 4.1279879632128145  | 6.3482689105939798  | Si64 |
| -0.0350770345652647 | 8.2642483142250445  | 20.8765709855624451 | Si65 |
| -0.0192683828442570 | 8.2972389767780879  | 6.3843913050642094  | Si66 |
| 7.1754971836614452  | 4.1162865461844484  | 20.8820332483399049 | Si67 |
| 7.1766466311255481  | 4.1055768498989496  | 9.5763924693062386  | Si68 |
| -0.0314856983635492 | 8.2533757031721873  | 17.6511935982908490 | Si69 |
| -0.0338613735661273 | 8.3096256768190599  | 9.6154127250460046  | Si70 |
| 7.1845206409961122  | 4.1027528982909853  | 17.6556304328712130 | Si71 |
| 7.1527535265522131  | 6.5637559420615199  | 22.8634806779477984 | All  |
| 7.8148216043077552  | 4.5273381606548639  | 0.4810501075889107  | H1   |
| -0.0145227733774336 | 9.0024250937459041  | 0.4977044707059314  | H2   |
| -0.0361413420586665 | 8.9669871139670896  | 26.7537345512978533 | H3   |
| 7.0699798462594021  | 4.5710764499468297  | 26.8238377371988967 | H4   |

|                     |                     |                     |     |
|---------------------|---------------------|---------------------|-----|
| 7.0760914528669119  | 9.1785649952205102  | 20.7095823503204919 | H5  |
| 6.3146562692367532  | 10.7201161599819113 | 20.2697962402797032 | H6  |
| 8.0936244345077704  | 10.5946557899570450 | 20.3791930668188499 | H7  |
| 6.1426130720419216  | 10.2383206218111020 | 22.7632781682205767 | H8  |
| 7.9003672934312927  | 10.1075437004894386 | 22.8636940092882810 | H9  |
| -5.0582472578090645 | 12.2232172036946931 | 22.6148943012523702 | H10 |
| 2.3320021223449681  | 1.7322124203130420  | 21.1608520321266553 | H11 |
| 0.2663685162974303  | 2.8400166525884072  | 20.3388613327810539 | H12 |
| 12.4428030393753932 | 2.0245704536020397  | 20.9775268401072417 | H13 |
| 12.2257075093297320 | 0.0247968949944726  | 22.4447925569250089 | H14 |
| 7.1269715415076123  | 12.1508293459974350 | 23.7343180677641996 | H15 |
| 7.1456650169090450  | 10.2680773343371463 | 20.8318592319845273 | C1  |
| 7.0807424580180918  | 10.5944625694892327 | 22.3161199579696330 | C2  |
| 1.2580970922187784  | 0.2239741417813730  | 22.2458105376450419 | C3  |
| 1.3568488557366569  | 1.3312635713277994  | 21.4366608273212336 | C4  |
| 0.1791768214028524  | 1.9571669163239598  | 20.9795244085473840 | C5  |
| 13.3278052324696468 | 1.4966108963205016  | 21.3340721443201247 | C6  |
| 13.2113353272189560 | 0.3919820125739084  | 22.1442327565297603 | C7  |
| 7.1743612293072339  | 12.1653302944574087 | 22.6193991746631724 | C8  |

Adsorbed ethylbenzene

|                     |                     |                     |     |
|---------------------|---------------------|---------------------|-----|
| 7.0898229103787767  | 4.2521595526445051  | 1.0070064005618571  | O1  |
| 0.0311479812183864  | 8.3642159530251750  | 1.0291529488539259  | O2  |
| 5.8351857562928782  | 3.5417704545261235  | 3.1721360505388541  | O3  |
| 1.3388090047656327  | 9.1219861345336373  | 24.0580384875290036 | O4  |
| 8.5149127099444861  | 3.4620133409227458  | 3.1474105903860536  | O5  |
| -1.2978613005685657 | 9.3029183545897514  | 24.0710158600094246 | O6  |
| 7.2632157399664035  | 5.8098287395149883  | 3.1967775567398449  | O7  |
| -0.1312724582947618 | 6.8827920182196669  | 24.0526683630709499 | O8  |
| 1.1773864980980546  | 9.4049762098449374  | 3.2364061865348552  | O9  |
| 5.9557011811027838  | 3.2296016575661550  | 24.0613191327993050 | O10 |
| -1.4531013767260719 | 9.0208229508751785  | 3.1778414022823687  | O11 |
| 8.5791580045590372  | 3.6472881888834348  | 24.0433958788778099 | O12 |
| 0.2007909930563505  | 6.9125578521230642  | 3.1859704384309686  | O13 |
| 6.8671065554830966  | 5.7299882390411225  | 24.2215736607314795 | O14 |
| 4.9693735183661181  | 1.3816674231480248  | 4.4743759522729807  | O15 |
| 2.0657209936576280  | 11.3462385567492472 | 22.7635096082130914 | O16 |
| 10.8168555570351028 | 3.8094443844281156  | 4.4477583815998214  | O17 |
| -3.5608569039334927 | 8.8946272248004608  | 22.7303232367474877 | O18 |
| 5.7868117820786527  | 7.6385228827715679  | 4.4652542621673872  | O19 |
| 1.4770015303805626  | 5.2259736408931792  | 22.7546710820503435 | O20 |
| 2.4086913252945203  | 11.3233603979090685 | 4.6042633082350539  | O21 |
| 4.6222303637644861  | 1.4018805502852882  | 22.6813496793182985 | O22 |
| -3.7243258747743768 | 9.1117241134680622  | 4.5735943354359030  | O23 |
| 10.8985854742842427 | 3.5900290299077908  | 22.7252823194469329 | O24 |

---

|                     |                     |                     |     |
|---------------------|---------------------|---------------------|-----|
| 1.2469857147471406  | 4.8997832030028192  | 4.5864894345488008  | O25 |
| 5.9683046519971725  | 8.0623154044812875  | 22.6599859672657864 | O26 |
| -1.1566311010274029 | 4.8294167659990856  | 22.6741729295988392 | O27 |
| 8.4220685095609387  | 7.7829170662379301  | 4.5545652700184958  | O28 |
| -2.4734839146673080 | 11.2732793546279240 | 22.7310259448885645 | O29 |
| 9.6021717083670488  | 1.4655352437291127  | 4.5425755057967221  | O30 |
| 3.6172620820943253  | 9.2179550732464897  | 22.7174586394031479 | O31 |
| 3.5513248063013556  | 3.6064470658632408  | 4.5438228343512961  | O32 |
| 8.6845987210365454  | 7.4991948699651871  | 22.8144495560106897 | O33 |
| -1.3821616113645936 | 5.1780425802547372  | 4.4346448896478385  | O34 |
| 9.3360361433927466  | 1.4654080541740979  | 22.7061875874587855 | O35 |
| -2.1865955361713327 | 11.2602324585755760 | 4.4178040644259147  | O36 |
| 3.7367581694550007  | 3.8890172453476937  | 22.7341475776890007 | O37 |
| 3.4936795055034464  | 8.9148649030991400  | 4.4654898563326331  | O38 |
| 5.8760797641742641  | 3.4801565632451590  | 5.8420554679839416  | O39 |
| 1.3580661551709934  | 9.1514649130026289  | 21.3724691552722881 | O40 |
| 8.5512904319518466  | 3.5533743897634569  | 5.8211519979122404  | O41 |
| -1.2937071860127647 | 9.3003889555347854  | 21.3887362944995054 | O42 |
| 7.1524486174655948  | 5.8330003909853350  | 5.8678907939768825  | O43 |
| -0.0874030734375260 | 6.9013446075206302  | 21.3836762447232545 | O44 |
| 1.2752723194281614  | 9.3000002990581088  | 5.9076488704773773  | O45 |
| 5.9642322611804861  | 3.2442997734572110  | 21.3650458945764292 | O46 |
| -1.3959415515653366 | 9.1457904534830234  | 5.8503609539762609  | O47 |
| 8.6047450212916381  | 3.6680124995325607  | 21.3654296474967751 | O48 |
| 0.0740984568992502  | 6.9118971166622041  | 5.8572416886005856  | O49 |
| 6.8927271337939064  | 5.7464781498892021  | 21.3425976285835119 | O50 |
| 7.2137505728620752  | 4.2492177227797248  | 7.9681580428756256  | O51 |
| -0.0206143263715770 | 8.4349812795115398  | 19.2461928578517885 | O52 |
| -0.0629855371099737 | 8.4291741417484705  | 8.0017891251029987  | O53 |
| 7.1742096332056917  | 4.1645292383572441  | 19.2190622545334087 | O54 |
| 5.6006058025650329  | 0.0272796903808226  | 6.6821133831227790  | O55 |
| 8.6782691706998207  | 0.0972026886697899  | 20.5148548404663700 | O56 |
| -2.7847993480048747 | 4.9937823847076288  | 6.6840300751357535  | O57 |
| -4.3390288359175422 | 7.6035829806916251  | 20.5455700275684734 | O58 |
| 4.3624884193361639  | 7.7795925676106190  | 6.7080476841075383  | O59 |
| 2.9169068624511540  | 5.1532551032683598  | 20.5293003226790418 | O60 |
| 8.9430518266204793  | 0.1903018185915211  | 6.7777601100290825  | O61 |
| 5.2931238441815225  | 0.0568108987523204  | 20.4831994734943663 | O62 |
| 9.8667773576750299  | 7.8859950242663697  | 6.7784699812827647  | O63 |
| -2.6729379747148378 | 4.7207599853745474  | 20.4961226452518410 | O64 |
| 2.7418254092756804  | 4.7752190841773707  | 6.7841386144076301  | O65 |
| 4.4469118560560421  | 8.0540737311149275  | 20.4615565864110174 | O66 |
| 7.3087367396638419  | 0.1273104403009832  | 4.6693696592871170  | O67 |
| 6.9895789734410760  | 0.1810933478527521  | 22.5457533308782629 | O68 |

---

---

|                     |                     |                     |      |
|---------------------|---------------------|---------------------|------|
| -3.7111568704073146 | 6.4578997234272792  | 4.6901328621159477  | O69  |
| -3.3777086003221508 | 6.2512812311404016  | 22.5782346101358726 | O70  |
| 3.5241389531278791  | 6.2605817268574784  | 4.7131059248071177  | O71  |
| 3.8070531769428406  | 6.5409982572161089  | 22.5872203763886539 | O72  |
| 7.2232540801389931  | 0.0974662225109136  | 8.7972770575504544  | O73  |
| 6.9918772768345079  | 0.0913936047868753  | 18.4407855699104921 | O74  |
| -3.6544866444304080 | 6.3973937935416005  | 8.7806007742412611  | O75  |
| -3.4930813811404100 | 6.2031687642124842  | 18.4410091533978004 | O76  |
| 3.5609767254347759  | 6.3146026750055730  | 8.7904786351740825  | O77  |
| 3.6705622932200517  | 6.5565368446962804  | 18.4068491098533542 | O78  |
| 4.8084248007901351  | 1.2494831127264019  | 8.8589788479551643  | O79  |
| 2.1078384557015726  | 11.3157751523298042 | 18.3415381362614553 | O80  |
| 10.9741446450345741 | 3.7303825878691508  | 8.8719426096875651  | O81  |
| -3.5935550333354360 | 8.8660154162059630  | 18.3855074122953823 | O82  |
| 5.7527740247586836  | 7.8440289222585138  | 8.9259806440847598  | O83  |
| 1.4053690517261859  | 5.1595909688823038  | 18.3929273118470888 | O84  |
| 2.4101713982635626  | 11.4383206927352052 | 9.0024861019012548  | O85  |
| 4.6724411638985499  | 1.4185871570808826  | 18.3045992959164074 | O86  |
| -3.8738956533261151 | 9.0540990082239823  | 9.0374849736631706  | O87  |
| 10.9249984082617893 | 3.5313674668160284  | 18.2911313298265803 | O88  |
| 1.3502015356908688  | 4.8228516514453066  | 9.0230722744156768  | O89  |
| 5.9863756061033602  | 7.9035386720652214  | 18.3260619967333582 | O90  |
| -1.2124557602257917 | 4.8165662334300174  | 18.3130233731182948 | O91  |
| 8.3854560317990412  | 7.5581447829369770  | 8.9350794220501761  | O92  |
| -2.5517745243535632 | 11.2846887711381978 | 18.2785388254928662 | O93  |
| 9.4420015333042464  | 1.5704335625068175  | 8.9585494670411752  | O94  |
| 3.7049813866894894  | 9.2241677764413357  | 18.2453233865142153 | O95  |
| 3.7200406931674306  | 3.6610199259523490  | 8.9592128613233672  | O96  |
| 8.5917239074881415  | 7.4597555600119003  | 18.4010892225637974 | O97  |
| -1.2610895374781228 | 5.2262460529474843  | 8.7925291089192381  | O98  |
| 9.2672771154673494  | 1.4761124368116638  | 18.3756153974238075 | O99  |
| -2.1997829449880042 | 11.0990379610484204 | 8.7902554816642038  | O100 |
| 3.7501164243528842  | 3.8936415137412208  | 18.3915759857833336 | O101 |
| 3.3516328599547789  | 8.9697939076915194  | 8.8039712750519783  | O102 |
| 6.0753751641394000  | 3.2121398757914941  | 10.1293332478892619 | O103 |
| 1.3271363203515163  | 9.1048013954282432  | 17.0570977280057505 | O104 |
| 8.6468006746033215  | 3.8129119535312817  | 10.1581094722821970 | O105 |
| -1.3029273496581508 | 9.2644112367558478  | 17.0715533519707385 | O106 |
| 6.8390304259042809  | 5.7380721317542198  | 10.1298604693360641 | O107 |
| -0.1209325315893683 | 6.9033400040791344  | 17.0738928617423227 | O108 |
| 1.1094214382126948  | 9.4360340257390671  | 10.1635292014341676 | O109 |
| 5.9598763188543744  | 3.3553655294102316  | 17.0011930206705166 | O110 |
| -1.4836673899400283 | 8.9436218768788365  | 10.1852841491589530 | O111 |
| 8.5863049047185758  | 3.6736219279442830  | 17.0240228211758655 | O112 |

---

---

|                     |                     |                     |      |
|---------------------|---------------------|---------------------|------|
| 0.2393635968423089  | 6.9396637614305527  | 10.1781332382003615 | O113 |
| 6.9936343506191667  | 5.7778380331651098  | 17.0918650907434220 | O114 |
| 3.9313678834898935  | 2.1753319971938625  | 11.1719941490945516 | O115 |
| 3.1956985496457309  | 10.6187885987378969 | 16.0387943103277344 | O116 |
| 10.6386639610113303 | 2.4757357581147028  | 11.1694715582970563 | O117 |
| -3.5457623119793360 | 10.1496107870108538 | 16.0817008083851576 | O118 |
| 7.0700331079489303  | 8.0882904331960219  | 11.2051108265415298 | O119 |
| 0.2587529770121724  | 4.5055857367754930  | 16.1096724273934022 | O120 |
| 3.4060373830021531  | 10.2045736508778475 | 11.1491347134465286 | O121 |
| 3.6246006716586443  | 2.5524700995462744  | 16.1270497428507582 | O122 |
| -3.2895713534357207 | 10.5779642989297678 | 11.1465843240443618 | O123 |
| 10.4401789180152793 | 2.0800317121340326  | 16.0981250174412907 | O124 |
| -0.2459657713530445 | 4.5560342677775409  | 11.1421563880992345 | O125 |
| 7.4560512696031891  | 8.1713840058464751  | 16.1201509745652487 | O126 |
| 2.3543356890552718  | 0.1168814645252921  | 11.8110078028568601 | O127 |
| 12.0983696799006708 | 0.0943429951297359  | 15.4412197285826363 | O128 |
| -1.2206062602231504 | 2.1761580595953882  | 11.8163859537255345 | O129 |
| -6.0928013690728111 | 10.5975976578913063 | 15.4512710788708088 | O130 |
| 5.9844954652322038  | 10.4667608608289875 | 11.7362640074296625 | O131 |
| 1.1063947000774434  | 2.0836805428349274  | 15.3862892580959905 | O132 |
| 11.6408955442555069 | 0.0866301264165130  | 11.6410590399040519 | O133 |
| 2.8269605555648010  | 0.0994168280037249  | 15.5825175142723342 | O134 |
| -5.8450858646004100 | 10.1806739545331819 | 11.6678674011902839 | O135 |
| -1.4678860009220909 | 2.5829128040932119  | 15.5612375523882189 | O136 |
| 1.3801006799816673  | 2.5520155974361640  | 11.6880678586311291 | O137 |
| 5.7539336842314865  | 10.1199032043357668 | 15.6145040664061536 | O138 |
| 3.1077089881563271  | 1.9135926788174562  | 13.6362397909981823 | O139 |
| 4.1179911902241866  | 10.8002666144674073 | 13.6049253895007745 | O140 |
| 11.2714597180946541 | 1.8514091110339463  | 13.6218883183848192 | O141 |
| -4.1422147918124725 | 10.7952005252411674 | 13.6232419455452014 | O142 |
| 7.1876210810567347  | 9.0216822152447875  | 13.6414626882553502 | O143 |
| -0.0328943105286412 | 3.7381391178783443  | 13.6242048088818848 | O144 |
| -0.0279439956979468 | 8.3089382550647368  | 26.2298283555607625 | O145 |
| 7.2544986735541821  | 4.0023861366732092  | 26.2730069289416370 | O146 |
| 5.0601039135744950  | 3.0035855495467132  | 4.4991166174596193  | Si1  |
| 2.0617844587075034  | 9.7266592109171128  | 22.7355832863444967 | Si2  |
| 9.3683672349594502  | 3.0740615723066451  | 4.4815099485068624  | Si3  |
| -2.1548764142868730 | 9.6802062339298818  | 22.7362550349114692 | Si4  |
| 7.1545722809892913  | 6.7633881609050155  | 4.5136206258786435  | Si5  |
| 0.0219834834401342  | 5.9530947457169274  | 22.7228557639987017 | Si6  |
| 2.0909587967152889  | 9.7286923440867330  | 4.5472237681666368  | Si7  |
| 5.0825736577539082  | 2.9688984224212569  | 22.7208824259808715 | Si8  |
| -2.1860244295445819 | 9.6377027550946863  | 4.4980575443448849  | Si9  |
| 9.3390184448488185  | 3.0995026999829811  | 22.7183330929028102 | Si10 |

---

---

|                     |                     |                     |      |
|---------------------|---------------------|---------------------|------|
| 0.0297666415069804  | 5.9759123962777076  | 4.5084399211416102  | Si11 |
| 4.6220073585623158  | 2.5830197088450895  | 9.7676148356712620  | Si12 |
| 2.5800720945092790  | 10.0645811086603754 | 17.4292244794968525 | Si13 |
| 9.9250419485452070  | 2.8839921756377782  | 9.7770838617063553  | Si14 |
| -2.7467340765088664 | 9.8943120068102655  | 17.4662759354286443 | Si15 |
| 7.0247192057586680  | 7.3142003515450460  | 9.7848107314036934  | Si16 |
| 0.0751968913817191  | 5.3429796928078730  | 17.4833442392120979 | Si17 |
| 2.5756910212762465  | 10.0164032922934148 | 9.7702392517816250  | Si18 |
| 4.5048287008279519  | 2.7971974900109013  | 17.4644756542337660 | Si19 |
| -2.7181347112170404 | 9.9212075731407143  | 9.7795012675677953  | Si20 |
| 9.8106742442293093  | 2.6969502941474475  | 17.4583616127458363 | Si21 |
| 0.0221996864163629  | 5.3794533651355048  | 9.7737852805442262  | Si22 |
| 7.2597367527898573  | 7.3277808743502488  | 17.4936391141679266 | Si23 |
| 2.6917124457511425  | 1.6841529023804289  | 12.0804887387510007 | Si24 |
| 4.4910049212168870  | 11.0378960883447448 | 15.1676914521110238 | Si25 |
| 11.6963900543031176 | 1.6502414040568476  | 12.0657132182887494 | Si26 |
| -4.5476744019906530 | 11.0365508776416181 | 15.1789539224446752 | Si27 |
| 7.2021875353622518  | 9.4447108145426348  | 12.0706784846699158 | Si28 |
| -0.0325993985645276 | 3.2260090136434911  | 15.1689324278029769 | Si29 |
| 4.4862590862253597  | 11.0163940515110887 | 12.0368809725703532 | Si30 |
| 2.6648442824698346  | 1.6627973333207862  | 15.1815625858446133 | Si31 |
| -4.5350037448437002 | 11.0457278841305193 | 12.0653661385110471 | Si32 |
| 11.6952496809358131 | 1.6508844358742603  | 15.1785139630161439 | Si33 |
| -0.0301609203936126 | 3.2519573651863145  | 12.0715920961539034 | Si34 |
| 7.1867009691144137  | 9.4752414019002540  | 15.2027584478176614 | Si35 |
| 5.7295007287200423  | 0.0743984662353935  | 5.0727284313543048  | Si36 |
| 8.5609681835515232  | 0.1664026814192976  | 22.1243419831739345 | Si37 |
| -2.8736097875686770 | 5.1136361052198627  | 5.0760301049694396  | Si38 |
| -4.2913564208350001 | 7.5467277697121933  | 22.1690444079829021 | Si39 |
| 4.2882639459499678  | 7.6459134651573244  | 5.0995280480485317  | Si40 |
| 2.9800949031373301  | 5.1852672943097788  | 22.1406502108534227 | Si41 |
| 8.8647528082037912  | 0.1526320988476119  | 5.1620396605705725  | Si42 |
| 5.4193054040607098  | 0.1105519757105792  | 22.0954127319729245 | Si43 |
| -4.5007954584662926 | 7.8054782655302102  | 5.1630237203856417  | Si44 |
| -2.6981455780194255 | 4.8489859908445840  | 22.1118808155837527 | Si45 |
| 2.7689866939499685  | 4.8893601297031415  | 5.1696557917753871  | Si46 |
| 4.3814225237449724  | 7.9526105682177244  | 22.0564688851758035 | Si47 |
| -1.5453635694400942 | 12.4970023754891297 | 8.2956076303776349  | Si48 |
| 8.5556925529726122  | 0.1258762284036757  | 18.9046384446454958 | Si49 |
| -2.7977642034756820 | 5.0938596247441419  | 8.2958555122918423  | Si50 |
| -4.3160915563308437 | 7.5243565246959809  | 18.9405049291675880 | Si51 |
| 4.2548606984508046  | 7.7157548898497970  | 8.3187391526725829  | Si52 |
| 2.9357932573161349  | 5.1869424475493009  | 18.9135009154000571 | Si53 |
| 8.8026759656537585  | 0.1952342230894388  | 8.3897416468156472  | Si54 |

---

|                     |                     |                     |      |
|---------------------|---------------------|---------------------|------|
| 5.4158579548399723  | 0.0944583445232109  | 18.8729148755321745 | Si55 |
| 9.9027009157582135  | 7.7192433448519022  | 8.3883757258298566  | Si56 |
| -2.7318533468519215 | 4.8265844645063902  | 18.8855602961342512 | Si57 |
| 2.8442952859924153  | 4.9012128024586357  | 8.3942651343417527  | Si58 |
| 4.4540413979184956  | 7.9184240942420434  | 18.8400891688766379 | Si59 |
| 7.1873100500754123  | 4.2738772587758316  | 2.6289834118794837  | Si60 |
| -0.0370871251527047 | 8.4111921773518272  | 24.6089210944576102 | Si61 |
| -0.0116021103848798 | 8.4392775514237144  | 2.6518026676175177  | Si62 |
| 7.1524513455855949  | 4.1986037324117476  | 24.6541423036485234 | Si63 |
| 7.1973200607080550  | 4.2796486330023802  | 6.3652455301774316  | Si64 |
| -0.0204176594256600 | 8.4404160789952005  | 20.8511786048008467 | Si65 |
| -0.0274134902361549 | 8.4473300223235910  | 6.3978920152829257  | Si66 |
| 7.1567267449929446  | 4.2436564715075509  | 20.8354674829642477 | Si67 |
| 7.1935995383193045  | 4.2529181953732902  | 9.5935403325610604  | Si68 |
| -0.0322146076754706 | 8.4250500672063886  | 17.6182397755940059 | Si69 |
| -0.0483775095627283 | 8.4368964271211624  | 9.6284206215645316  | Si70 |
| 7.1804676796056768  | 4.2469458637575110  | 17.6006790637224100 | Si71 |
| 7.2035323237479769  | 6.6422481626969896  | 22.7979758786294937 | All  |
| 7.7913588881248135  | 4.6818877067297802  | 0.4947570200933993  | H1   |
| -0.0261746947259676 | 9.1901109475585461  | 0.5252146455991171  | H2   |
| -0.0940169182674584 | 9.1269203087983755  | 26.7455834482006800 | H3   |
| 6.7740227924933833  | 4.6433437882528779  | 26.8183145991671168 | H4   |
| 6.3860944488341183  | 8.9579823295123795  | 22.5486058117023589 | H5   |
| 4.7845092444280448  | 11.5055096698592099 | 21.5474139797378896 | H6   |
| 5.5316806253384554  | 11.2111843786614234 | 19.1996721250646338 | H7   |
| 7.9339047430119534  | 10.7725027892271275 | 18.6953102004064107 | H8   |
| -4.8620408411047382 | 10.5787642696207431 | 20.5661347478712813 | H9   |
| -5.6122922836805413 | 10.8364019059250651 | 22.9118803096039834 | H10  |
| 7.0411736503750326  | 11.0561705896940232 | 24.5250582612672403 | H11  |
| 13.0603308983958328 | 0.6692731868100686  | 25.1247081849396707 | H12  |
| 12.5914746506671555 | 0.9197620162697352  | 23.4286551809834016 | H13  |
| -0.1301805859139609 | 1.0183132097196785  | 23.8964951678977719 | H14  |
| 5.3440218681612226  | 10.9735835193770370 | 24.0233268747568189 | H15  |
| 5.8341804585078023  | 11.2900369832206913 | 21.3335093258289099 | C1   |
| 6.2566984439387703  | 11.1358639332223017 | 20.0123354720924418 | C2   |
| 7.6027162599127074  | 10.8836856800977237 | 19.7299629612755965 | C3   |
| -5.9149474801030335 | 10.7737631696473191 | 20.7773404082311508 | C4   |
| 8.0929178928232233  | 10.9186978932899645 | 22.1015463907565533 | C5   |
| 6.7460863589337903  | 11.1898710253075002 | 22.4035867202685814 | C6   |
| 6.3043537145310413  | 11.4768724418407704 | 23.8216341600390642 | C7   |
| 13.3604173904117047 | 0.4831275363283249  | 24.0831492492070645 | C8   |

Co-adsorption of ethene and benzene

|                    |                    |                    |    |
|--------------------|--------------------|--------------------|----|
| 7.0720937072256644 | 4.0788524992897459 | 1.0482117665103907 | O1 |
| 0.0827870247431521 | 8.1340666178515892 | 1.0580669099106197 | O2 |



---

|                     |                     |                     |     |
|---------------------|---------------------|---------------------|-----|
| 5.8820360814185388  | 3.3432709787792612  | 3.2428655849057884  | O3  |
| 1.1731432246666227  | 9.2113900186072666  | 24.0569853285982802 | O4  |
| 8.5616183276893967  | 3.2634000920122910  | 3.1336375901585813  | O5  |
| -1.4402726402774544 | 8.8085588708396010  | 24.2129480458608164 | O6  |
| 7.3074349462394075  | 5.6080049186840908  | 3.2538490245667537  | O7  |
| 0.2248435091450309  | 6.7100994432283905  | 24.0786726757674785 | O8  |
| 1.2098507454110079  | 9.2046800356030527  | 3.2615577835366216  | O9  |
| 5.9957131230768574  | 3.0382045188730578  | 24.1060896279578429 | O10 |
| -1.4235505469159002 | 8.8551109086174993  | 3.1689461511349091  | O11 |
| 8.6268757701813588  | 3.3388345108703454  | 24.2153078085207483 | O12 |
| 0.2033014942847422  | 6.7263884717064437  | 3.2465763545852275  | O13 |
| 7.0186234848444453  | 5.5044104486322318  | 24.2572742175373861 | O14 |
| 5.0023276844766649  | 1.1852097114024389  | 4.5303637860853074  | O15 |
| 2.3589275237149749  | 11.2068313597777109 | 22.7474953386363623 | O16 |
| 10.8445058573371576 | 3.6019684524383306  | 4.4723262455045161  | O17 |
| -3.6835427009696584 | 8.9475272897496598  | 22.7766488566630336 | O18 |
| 5.8281179696209522  | 7.4440726888360924  | 4.5113497649490428  | O19 |
| 1.4346748539295691  | 4.7666415627403156  | 22.7476879857912628 | O20 |
| 2.4349863687443962  | 11.1191219681860627 | 4.6381133568449764  | O21 |
| 4.8382877935280382  | 1.1006843629476082  | 22.7172217032223962 | O22 |
| -3.6891929613382084 | 8.9026867339484426  | 4.5725497346917976  | O23 |
| 10.9163859110411536 | 3.6495516405806465  | 22.8771810263283122 | O24 |
| 1.2812055058154015  | 4.7092763845362802  | 4.6097650790329165  | O25 |
| 5.8265825670915037  | 7.7295483191744720  | 22.7753208174060902 | O26 |
| -1.2103109379890844 | 4.9017497573740183  | 22.7373349214321721 | O27 |
| 8.4599924475984345  | 7.5780382891658551  | 4.6173159502475265  | O28 |
| -2.0507949050266294 | 11.0245894618583105 | 22.9000411124295482 | O29 |
| 9.6221824125351851  | 1.2588837718312240  | 4.5419246417434929  | O30 |
| 3.4771824167685939  | 8.8187321389089561  | 22.8039718758312162 | O31 |
| 3.5793096245620388  | 3.4064798123628823  | 4.5812758350458482  | O32 |
| 8.5772699904214988  | 7.4881798764817589  | 22.8227753010020074 | O33 |
| -1.3496644474995549 | 4.9621337412650952  | 4.4894113659053634  | O34 |
| 9.6399007519770201  | 1.3411397861442576  | 22.7630106725378631 | O35 |
| -2.1648347833724166 | 11.0661967678993189 | 4.4507666678437801  | O36 |
| 3.7282185049389716  | 3.4856028877233847  | 22.7709121835387052 | O37 |
| 3.5283221540141980  | 8.7153512692944179  | 4.4882540942582327  | O38 |
| 5.8848775052832911  | 3.2870935105456804  | 5.9151502206803626  | O39 |
| 1.2700926400213781  | 9.1963582481162085  | 21.3721312177808898 | O40 |
| 8.5582272240199266  | 3.3451508461788357  | 5.8068496978518498  | O41 |
| -1.3636436100596057 | 8.8383348011500793  | 21.5290254005120119 | O42 |
| 7.1755705911468013  | 5.6327832223359255  | 5.9254687704575622  | O43 |
| 0.2577711487617136  | 6.7190453262219254  | 21.4051417459342552 | O44 |
| 1.3085233214144889  | 9.0839459662420872  | 5.9328849771209793  | O45 |
| 5.9978930205201095  | 3.0633857087611691  | 21.4064822727384865 | O46 |

---

---

|                     |                     |                     |     |
|---------------------|---------------------|---------------------|-----|
| -1.3607814302582462 | 8.9332865497800515  | 5.8447683207286358  | O47 |
| 8.6355375829647052  | 3.4860310512643351  | 21.5352097232077782 | O48 |
| 0.1016161576107208  | 6.6964270622804483  | 5.9198207809442600  | O49 |
| 6.9391877636018320  | 5.5631789782908170  | 21.3739029409749968 | O50 |
| 7.3082503309117026  | 4.0195451686699171  | 8.0041766019623513  | O51 |
| -0.0835085207086630 | 8.2761685369737759  | 19.3057247411743127 | O52 |
| -0.0676753953063569 | 8.2669603590516623  | 8.0293765309896070  | O53 |
| 7.3370790824792174  | 3.9118499082832328  | 19.3196995212679354 | O54 |
| -1.6112433317554977 | 12.3130812835216616 | 6.7309142891533833  | O55 |
| 9.0426572180234306  | 0.0357708990382944  | 20.5241515925006688 | O56 |
| 11.6586938283545702 | 4.7653053232000593  | 6.7259620224128147  | O57 |
| 9.9600206104517213  | 7.7290697185103490  | 20.5583814042324846 | O58 |
| 4.3795901778880841  | 7.5830827045678690  | 6.7379647945873238  | O59 |
| 2.9010640455995502  | 4.6791431583622023  | 20.5338472629997568 | O60 |
| 9.0130948842479413  | 0.0168814879067339  | 6.8085444721001753  | O61 |
| -1.6419745827719900 | 12.2134354808354875 | 20.5615082457611571 | O62 |
| 9.9525565576341251  | 7.7165610618277753  | 6.8123045402340239  | O63 |
| 11.6845605146850282 | 4.7123702688618714  | 20.5736652489359528 | O64 |
| 2.7683281350594875  | 4.6011918563800291  | 6.8088988644265473  | O65 |
| 4.3559414082489187  | 7.7194850524606053  | 20.5409344468773725 | O66 |
| 0.118230077629459   | 12.4180461286559627 | 4.7356146433964055  | O67 |
| 7.3000574736304555  | 0.0791993769499233  | 22.5423683311462106 | O68 |
| 10.7577146712745346 | 6.2484693266905831  | 4.7334394629996286  | O69 |
| -3.4555330863514033 | 6.3123397523171416  | 22.5684771039306646 | O70 |
| 3.5669349004604682  | 6.0620341147513477  | 4.7310115548165248  | O71 |
| 3.7212917004350787  | 6.1360198037108944  | 22.5978299118182306 | O72 |
| 0.0536447636886246  | 12.4136436079909753 | 8.8140090158670539  | O73 |
| 0.0692001348055191  | 12.4629276972270180 | 18.5216841138980044 | O74 |
| 10.8254413781372740 | 6.2057954239953492  | 8.8155923940469609  | O75 |
| -3.5775439337077368 | 6.2304307478136476  | 18.5396908979751167 | O76 |
| 3.5983569940300946  | 6.1209987576023357  | 8.8271503088699266  | O77 |
| 3.6359890423569801  | 6.1765342076804686  | 18.4818720815307280 | O78 |
| 4.8471465933196409  | 1.0458073275114508  | 8.9155212809971722  | O79 |
| 2.4696420129438970  | 11.3090743945424776 | 18.2839734962274960 | O80 |
| 11.0197155888064486 | 3.5408965082402277  | 8.9433999542281732  | O81 |
| -3.8171321957772926 | 8.8860210754409614  | 18.2884461837449166 | O82 |
| 5.7940653654063174  | 7.6477362657713988  | 8.9438930883428149  | O83 |
| 1.4440141741255852  | 4.6482084792106431  | 18.3238258743528561 | O84 |
| 2.4552192105537856  | 11.2487351744191670 | 9.0293214211048731  | O85 |
| 4.8595729839085307  | 1.0715710048401998  | 18.4112842688000349 | O86 |
| -3.8304649487298112 | 8.8603418034334371  | 9.0957256969109359  | O87 |
| 11.0795750557369104 | 3.5787776213787255  | 18.2864211312078275 | O88 |
| 1.3938811161583442  | 4.6171892523960905  | 9.0547722581019823  | O89 |
| 5.8233360637433602  | 7.7261025613930192  | 18.3606793968002933 | O90 |

---

---

|                     |                     |                     |      |
|---------------------|---------------------|---------------------|------|
| -1.1752406540261187 | 5.0768310110974850  | 18.5096800644538177 | O91  |
| 8.4287554611055651  | 7.3683548567344701  | 8.9326657272824743  | O92  |
| -2.1096293695879886 | 10.9286104929006846 | 18.3599410703122921 | O93  |
| 9.4911502531889607  | 1.3801923252235540  | 9.0041641832043542  | O94  |
| 3.4104699992544480  | 8.8338822550793701  | 18.3980934993341734 | O95  |
| 3.7691127306031316  | 3.4656810863182019  | 8.9591395097929123  | O96  |
| 8.4513489338090473  | 7.3810713211066963  | 18.4330540975481121 | O97  |
| -1.2159766326657890 | 5.0319365957354014  | 8.8099112032244982  | O98  |
| 9.5057231520697769  | 1.4452507299438302  | 18.3671614187655123 | O99  |
| -2.1442073572175744 | 10.9000751061851062 | 8.8570098564113380  | O100 |
| 3.8373747039611046  | 3.5189356569835075  | 18.3739663037094196 | O101 |
| 3.3956072504905750  | 8.7785841867288514  | 8.8437152126031933  | O102 |
| 6.1133386748715672  | 3.0250341971988264  | 10.1547786552908104 | O103 |
| 1.0954703289446979  | 9.3227181216452522  | 17.1748683941434308 | O104 |
| 8.6881312394305414  | 3.6075102042957181  | 10.2274269461196408 | O105 |
| -1.4621933087671288 | 8.6887498462066528  | 17.0781922873260541 | O106 |
| 6.8936398811765187  | 5.5448205370509935  | 10.1356055102051901 | O107 |
| 0.3718823972495620  | 6.7754140272095418  | 17.1647260156298387 | O108 |
| 1.1417811330785348  | 9.2537206801541494  | 10.1805498072518308 | O109 |
| 6.1420900564237897  | 3.0283354133903750  | 17.1290639583751521 | O110 |
| -1.4453811329624582 | 8.7450583790055703  | 10.2513104964831161 | O111 |
| 8.7085394892115051  | 3.6471541291025491  | 17.0761134716879148 | O112 |
| 0.2921400236590879  | 6.7521943644370399  | 10.1792924835829375 | O113 |
| 6.8862345073514462  | 5.5550734292146187  | 17.2669827460003162 | O114 |
| 3.9519374150832389  | 2.0268527464758415  | 11.1990594982255089 | O115 |
| 3.3241787598229093  | 10.0983963926836324 | 16.0692635794994629 | O116 |
| 10.6804704147490135 | 2.2656049365302109  | 11.2297070088551330 | O117 |
| -3.2906740339909217 | 10.2821987114943418 | 16.0851774129278375 | O118 |
| 7.1353542452376093  | 7.8932619324406366  | 11.2114793040407434 | O119 |
| -0.1153811996583869 | 4.4047430135512409  | 16.1726007427563694 | O120 |
| 3.4282776208737475  | 10.0169149323646653 | 11.1891821922752790 | O121 |
| 3.9385987239642803  | 2.0752216395970895  | 16.1392670097824258 | O122 |
| -3.2575763720991167 | 10.3881204359461190 | 11.2051649185155213 | O123 |
| 10.6270866443373571 | 2.1928170108712330  | 16.0803340272313307 | O124 |
| -0.2069138059461131 | 4.3822688970516062  | 11.1690218910032915 | O125 |
| 7.2244545771069815  | 7.8645343152467122  | 16.1131280296078181 | O126 |
| -4.8412874223488380 | 12.4536623720725945 | 11.7771328652001621 | O127 |
| 4.6055941643616523  | 12.3710129059044185 | 15.6465489163252549 | O128 |
| 13.2694677299940516 | 1.9960583756041275  | 11.8331946956086238 | O129 |
| 8.5443947578914177  | 10.0924326035098932 | 15.6152568684102508 | O130 |
| 6.0007369334312113  | 10.2281428940054511 | 11.8088971245906755 | O131 |
| 1.3992690478052814  | 2.3502578387128286  | 15.5002063044081204 | O132 |
| 4.5079864897773163  | 12.3820484165525198 | 11.6390514859110024 | O133 |
| -4.7618792641435732 | 12.4432636344023777 | 15.5819364498112964 | O134 |

---

---

|                     |                     |                     |      |
|---------------------|---------------------|---------------------|------|
| 8.6085759353891707  | 10.0185483123721397 | 11.6831598936292007 | O135 |
| 13.2271541121177929 | 2.0688296299967428  | 15.5284205842863336 | O136 |
| 1.4273865586420915  | 2.4129770565169508  | 11.8234021518448191 | O137 |
| 5.9187751849503005  | 10.1030329290052876 | 15.5405891560500944 | O138 |
| 3.2044570759258435  | 1.6451552891731078  | 13.6673074591817976 | O139 |
| 4.1183212161777343  | 10.6581762539440437 | 13.6433151714377932 | O140 |
| 11.3694425039962219 | 1.5951088268829823  | 13.6577972559627820 | O141 |
| -4.1560363873723318 | 10.6859576033901753 | 13.6561866580557503 | O142 |
| 7.2818939927598176  | 8.7895610270459805  | 13.6591571955863191 | O143 |
| -0.0866229626840198 | 3.6142120626444760  | 13.6706228780511108 | O144 |
| 0.1364434874434943  | 8.0956309116949434  | 26.2812265490005181 | O145 |
| 7.1523929760340668  | 3.8170334405707700  | 26.3618544342542478 | O146 |
| 5.0897578753717641  | 2.8062146625429221  | 4.5594019384973414  | Si1  |
| 2.0511765563344841  | 9.6145217031243480  | 22.7516034999716581 | Si2  |
| 9.3945508391808925  | 2.8682432702864413  | 4.4797963059293506  | Si3  |
| -2.1341029862070768 | 9.4081522785297533  | 22.8602409409533500 | Si4  |
| 7.1915438424022406  | 6.5619461979424063  | 4.5694994905395863  | Si5  |
| 0.1567643664017493  | 5.7737797751749511  | 22.7471759943305862 | Si6  |
| 2.1220793207168320  | 9.5240463572241350  | 4.5738963882300006  | Si7  |
| 5.1577248553158039  | 2.6992737030203342  | 22.7642240105108726 | Si8  |
| -2.1559196710604458 | 9.4427061243557677  | 4.5034005805820696  | Si9  |
| 9.4369721051929254  | 2.9614276249072087  | 22.8611703475326138 | Si10 |
| 0.0537667018573385  | 5.7748636717222865  | 4.5595525893987618  | Si11 |
| 4.6592211143413271  | 2.3979768412930138  | 9.7943570362369794  | Si12 |
| 2.5804066303262809  | 9.8946963655238438  | 17.4925911605788400 | Si13 |
| 9.9700160932221937  | 2.6856445536853761  | 9.8385874987650563  | Si14 |
| -2.6779276486525196 | 9.7003706015608611  | 17.4666837726100290 | Si15 |
| 7.0747077574262933  | 7.1209112044861378  | 9.7916872047083494  | Si16 |
| 0.1278862433011767  | 5.2122032666562177  | 17.5548335312478549 | Si17 |
| 2.6130252010366526  | 9.8284886545668435  | 9.8009860933901312  | Si18 |
| 4.6875074890578574  | 2.4275051591861203  | 17.5276265161507787 | Si19 |
| -2.6771802885127216 | 9.7269515890001479  | 9.8433528811594027  | Si20 |
| 9.9789585318552518  | 2.7125001137873088  | 17.4684503386807393 | Si21 |
| 0.0658133837124364  | 5.1896694089698743  | 9.7927236410583856  | Si22 |
| 7.1115881561044070  | 7.1342002529929118  | 17.5565239437758684 | Si23 |
| 2.7342463035893596  | 1.5041308151819248  | 12.1180221736475815 | Si24 |
| 4.4975388192689385  | 10.8101856157527454 | 15.2154129246844967 | Si25 |
| 11.7661086975057287 | 1.4386917498266676  | 12.0920817546300583 | Si26 |
| -4.5244862808133188 | 10.8751980096578400 | 15.2271344037085807 | Si27 |
| 7.2507759676722321  | 9.2366747710279835  | 12.0973798528860499 | Si28 |
| -0.0011224984654057 | 3.1090966741767554  | 15.2165997475528947 | Si29 |
| 4.5155538844028413  | 10.8204887576663555 | 12.0759495743356045 | Si30 |
| 2.7465891285066393  | 1.5012192258618489  | 15.2197153133944099 | Si31 |
| -4.5200286656373105 | 10.8889420561551358 | 12.0856740960723439 | Si32 |

---

---

|                     |                     |                     |      |
|---------------------|---------------------|---------------------|------|
| 11.7653615510340614 | 1.4373842974235520  | 15.2233685845586830 | Si33 |
| -0.0074297506861667 | 3.0986338121149601  | 12.1287385475833673 | Si34 |
| 7.2379591867077755  | 9.2148015171891924  | 15.2261892876585563 | Si35 |
| -1.4641768209841608 | 12.3701634804266654 | 5.1236068572083209  | Si36 |
| 8.8774294627788866  | 0.0537517463147515  | 22.1336756021943017 | Si37 |
| 11.5866171614071405 | 4.8983595815228993  | 5.1174899765789528  | Si38 |
| 10.0360270381435548 | 7.5967084819485509  | 22.1803462611271662 | Si39 |
| 4.3228461377138547  | 7.4491503217253063  | 5.1287437359996106  | Si40 |
| 2.9450966968444257  | 4.7533210028727133  | 22.1449656230119274 | Si41 |
| 1.6834267801995768  | 12.4532817009372661 | 5.1951541824821028  | Si42 |
| -1.4891091938307621 | 12.3556425174098408 | 22.1656080240769668 | Si43 |
| 9.9806346353702846  | 7.6057348656182517  | 5.1977729466527851  | Si44 |
| -2.7448838324523201 | 4.9031883347010377  | 22.1810154398849555 | Si45 |
| 2.8018628245494428  | 4.6983911443947992  | 5.1943677652663851  | Si46 |
| 4.2685940812246104  | 7.5784244532795713  | 22.1335201383090379 | Si47 |
| -1.5066399339214982 | 12.2978594936462287 | 8.3428873660919791  | Si48 |
| 8.8665735713609450  | 0.0626469829925962  | 18.9165187801524795 | Si49 |
| -2.7602470325868267 | 4.8937585029433901  | 8.3366009394191103  | Si50 |
| 9.9797245020762713  | 7.5457649792166901  | 18.9562422039664114 | Si51 |
| 4.2903041997263482  | 7.5217018662362820  | 8.3496773498289034  | Si52 |
| 2.9490841452378094  | 4.7559642660851766  | 18.9185830903310261 | Si53 |
| 8.8535081911624740  | 0.0110011193083140  | 8.4193443621449973  | Si54 |
| -1.4968332578251431 | 12.3045426667962872 | 18.9543318501212354 | Si55 |
| 9.9577215214236663  | 7.5328134466348819  | 8.4204860973458384  | Si56 |
| -2.7217555768229822 | 4.9065034541288268  | 18.9702777480734213 | Si57 |
| 2.8837039594059317  | 4.7097349860392228  | 8.4179982756724865  | Si58 |
| 4.3085582729498615  | 7.5941903265195254  | 18.9189656944463280 | Si59 |
| 7.2168426048750192  | 4.0803538259873751  | 2.6666556639060759  | Si60 |
| 0.0159110399089197  | 8.2151996249592028  | 24.6656893040467011 | Si61 |
| 0.0171032708653254  | 8.2429886344228898  | 2.6778138057578946  | Si62 |
| 7.1956860404376544  | 3.9727948997562277  | 24.7357380943899905 | Si63 |
| 7.2292176467137894  | 4.0727643040593700  | 6.4034017237966836  | Si64 |
| 0.0157841085016797  | 8.2535928451553566  | 20.9045400101464338 | Si65 |
| -0.0024204058961086 | 8.2447758828958069  | 6.4257474964852719  | Si66 |
| 7.2206750370486645  | 4.0455449703691420  | 20.9244063008213068 | Si67 |
| 7.2489352747125446  | 4.0505550784484843  | 9.6284057476899658  | Si68 |
| -0.0182431160791365 | 8.2610687136982737  | 17.6800709020102182 | Si69 |
| -0.0186420235308464 | 8.2533398372995759  | 9.6559247258060363  | Si70 |
| 7.2667947540761233  | 4.0437851769395969  | 17.7095636217307799 | Si71 |
| 7.1997455496311265  | 6.4612018023303728  | 22.8372567405498295 | All  |
| 7.7767067643507373  | 4.4823114901842187  | 0.5191219465945793  | H1   |
| 0.0246393045401572  | 8.9478193400271362  | 0.5350171097006531  | H2   |
| -0.0437457864979489 | 8.8818024244615827  | 26.8186743170598625 | H3   |
| 7.0279746100904257  | 4.6351943199957271  | 26.8655400733261089 | H4   |

---

|                     |                     |                     |     |
|---------------------|---------------------|---------------------|-----|
| 6.1755592011521108  | 8.6804316622489708  | 22.7814506955565967 | H5  |
| 6.1319297838058100  | 10.9617492222598401 | 21.3763261454281199 | H6  |
| 7.7547396355203277  | 10.0503662684410191 | 21.3733823083838956 | H7  |
| 6.1351428877857153  | 10.9516809990168458 | 23.8608826937952472 | H8  |
| 7.7702613109502243  | 10.0470603576712776 | 23.8483137860008085 | H9  |
| 2.1389388814830732  | 1.3416940218025646  | 21.5502599263704653 | H10 |
| 2.3948371494899532  | 0.4502767558480564  | 19.2418859477642172 | H11 |
| 0.3968170431377952  | 0.2057110498809152  | 17.7685810393042445 | H12 |
| 12.5796769580813805 | 0.8499287277305373  | 18.6146967794856799 | H13 |
| 12.3248167802381161 | 1.7556774242931634  | 20.9213350703886576 | H14 |
| -0.1094398652836053 | 2.0138282733529662  | 22.3841837960624623 | H15 |
| 6.9359599376340269  | 10.4909981666993488 | 21.9474967368222913 | C1  |
| 6.9408758477069394  | 10.4862625820277575 | 23.2875566302860051 | C2  |
| 1.2641538936206120  | 1.2408600927385065  | 20.9039682277894379 | C3  |
| 1.4060818461934188  | 0.7338044267003783  | 19.6084364002356857 | C4  |
| 0.2854947023736001  | 0.5950781350211533  | 18.7829537246320797 | C5  |
| 13.4553124734450904 | 0.9606938991501822  | 19.2575696242811176 | C6  |
| 13.3122322743651154 | 1.4693703234463598  | 20.5526083231657459 | C7  |
| 0.0007535427076577  | 1.6118030623810700  | 21.3750354881263398 | C8  |

TS3

|                     |                     |                     |     |
|---------------------|---------------------|---------------------|-----|
| 7.0816989859900650  | 4.0607900437338529  | 1.0561397082363357  | O1  |
| 0.0714926526196420  | 8.1196238416697977  | 1.0708123655143904  | O2  |
| 5.8836358483795017  | 3.3349994264357519  | 3.2495062922365139  | O3  |
| 1.1629197237047171  | 9.2397237141223236  | 24.0426306288334821 | O4  |
| 8.5642448112760352  | 3.2524651705872407  | 3.1508079324505296  | O5  |
| -1.4397162345095813 | 8.8031634246714141  | 24.1874741605804466 | O6  |
| 7.3117461462708278  | 5.5978623221444561  | 3.2559321477288874  | O7  |
| 0.2495774999070681  | 6.7214522344737588  | 24.0848499172327131 | O8  |
| 1.2142861071181308  | 9.1977092356978893  | 3.2622782606936003  | O9  |
| 5.9630043397188901  | 3.1018489483086764  | 24.1274689595300984 | O10 |
| -1.4167595502353123 | 8.8319711463255075  | 3.1983498752785278  | O11 |
| 8.6063614822616668  | 3.2130363384218130  | 24.2108363789842933 | O12 |
| 0.2219395163334270  | 6.7124702117306985  | 3.2576420836264974  | O13 |
| 7.1617886630078598  | 5.4952060476856941  | 24.2291986205448744 | O14 |
| 5.0058915057393030  | 1.1735955607094397  | 4.5319904312544024  | O15 |
| 2.3916198520487466  | 11.1904644990968567 | 22.7157253698122297 | O16 |
| 10.8503179953471989 | 3.5921439627506460  | 4.4896221985062130  | O17 |
| -3.6628258180217386 | 9.0036246430508982  | 22.7293299505919144 | O18 |
| 5.8277549854997224  | 7.4302869614301530  | 4.5122442875684126  | O19 |
| 1.3814881131252537  | 4.7299102575718921  | 22.7318119453543126 | O20 |
| 2.4394974426008833  | 11.1096677382972686 | 4.6438539848182270  | O21 |
| 4.8784730469454063  | 1.1308662149296964  | 22.7193324525821190 | O22 |
| -3.6864043020582562 | 8.8939206497125181  | 4.5920354015837024  | O23 |
| 10.8862354841386200 | 3.6851228859131151  | 22.8980327949691222 | O24 |

---

|                     |                     |                     |     |
|---------------------|---------------------|---------------------|-----|
| 1.2831286779647932  | 4.6946308011358102  | 4.6327578115916577  | O25 |
| 5.8234763623231967  | 7.6831290598166522  | 22.8535044429093865 | O26 |
| -1.2423249635199474 | 4.9225979219739422  | 22.7914993685069653 | O27 |
| 8.4613108787151141  | 7.5676630060727410  | 4.6209267547396333  | O28 |
| -2.0050331730689273 | 11.0564483856981983 | 22.9106192787502678 | O29 |
| 9.6300151511824641  | 1.2491389566418327  | 4.5546758316036611  | O30 |
| 3.4971048182783875  | 8.8096022950273376  | 22.8414492914432579 | O31 |
| 3.5833051405682665  | 3.3953847571171822  | 4.5964795060700032  | O32 |
| 8.5852755561669785  | 7.5751598555870698  | 22.8176631437735118 | O33 |
| -1.3461331661963107 | 4.9559859424941122  | 4.4925618390764557  | O34 |
| 9.7328494345821390  | 1.3187602667826495  | 22.7153102916808756 | O35 |
| -2.1573993558397184 | 11.0537626734923808 | 4.4642539455179575  | O36 |
| 3.6852468645441108  | 3.4706589467066573  | 22.7823507872351918 | O37 |
| 3.5300933699003290  | 8.7039148385029268  | 4.4895842912408570  | O38 |
| 5.8923949376819289  | 3.2712769325386128  | 5.9208892176835572  | O39 |
| 1.3068836477569059  | 9.1638078016276232  | 21.3636881511243040 | O40 |
| 8.5653982840694862  | 3.3339059392206560  | 5.8237686273721234  | O41 |
| -1.3336520160380214 | 8.8914857898754853  | 21.5008998524963957 | O42 |
| 7.1775209230691992  | 5.6205539676738789  | 5.9268804522896357  | O43 |
| 0.2117798766910450  | 6.7129451976441166  | 21.4124305255437477 | O44 |
| 1.3098561553189469  | 9.0749316882648543  | 5.9336215008312516  | O45 |
| 5.9722177988585727  | 3.1507760976057608  | 21.4263948673110605 | O46 |
| -1.3614509429815413 | 8.9284906050101842  | 5.8731566362943202  | O47 |
| 8.6277476283876613  | 3.4209743182436694  | 21.5247193778098236 | O48 |
| 0.0995374135832483  | 6.6895351472720490  | 5.9288793300448530  | O49 |
| 7.0581933619993329  | 5.6054627897683833  | 21.3667425008403242 | O50 |
| 7.3035941079378013  | 4.0178949459729560  | 8.0123791835584690  | O51 |
| -0.0554217294652135 | 8.2555539500652024  | 19.2964900089416069 | O52 |
| -0.0444083816967140 | 8.2560168691905904  | 8.0420759607857661  | O53 |
| 7.3307660400755044  | 3.9114914588868817  | 19.3297595423237922 | O54 |
| -1.6046335811356691 | 12.3142691378917419 | 6.7384489830280794  | O55 |
| 9.0761164170761823  | 0.0177448042763801  | 20.4978976862966817 | O56 |
| 11.6759688943276050 | 4.7678924534223110  | 6.7364638848426832  | O57 |
| -4.4646758098437020 | 7.7527785767905373  | 20.5388132124589404 | O58 |
| 4.3803106860727139  | 7.5773898951803984  | 6.7419334591819222  | O59 |
| 2.8596521620961117  | 4.6088528784108149  | 20.5357907653773957 | O60 |
| 9.0178000932776747  | 0.0038497500465434  | 6.8177051555290502  | O61 |
| -1.6061923348841294 | 12.2358258163607854 | 20.5707853079964877 | O62 |
| 9.9428082827375110  | 7.6970567056903212  | 6.8219380310117188  | O63 |
| 11.7015650954808343 | 4.7191669219967620  | 20.6003997746000209 | O64 |
| 2.7766045754949156  | 4.5868087304293566  | 6.8283786917533327  | O65 |
| 4.3646396937490888  | 7.7082410648774982  | 20.6022588652303362 | O66 |
| 0.1239560355008189  | 12.4103128677742021 | 4.7427763694230052  | O67 |
| 7.3501816136219604  | 0.1150356113644499  | 22.5346071217261574 | O68 |

---

---

|                     |                     |                     |      |
|---------------------|---------------------|---------------------|------|
| 10.7595831931713715 | 6.2388634505603342  | 4.7415905078678193  | O69  |
| -3.4625770414058419 | 6.3554815322823544  | 22.5616417270645542 | O70  |
| 3.5659088801418055  | 6.0501607371117334  | 4.7440538364670308  | O71  |
| 3.6330800007222765  | 6.1354049219920768  | 22.5941915569382274 | O72  |
| 0.0601165955614693  | 12.4047493287669912 | 8.8233756652085589  | O73  |
| 0.0878192179282973  | 12.4428737387258810 | 18.5060384603244970 | O74  |
| 10.8285760869143637 | 6.1972791041321749  | 8.8276815898780825  | O75  |
| 10.8636109071101750 | 6.2208230929501758  | 18.5454817633087217 | O76  |
| 3.6039038628114737  | 6.1174903695173120  | 8.8369653389620826  | O77  |
| 3.6506940333726781  | 6.1533719480742608  | 18.5292834846342167 | O78  |
| 4.8583856308799316  | 1.0467721259633962  | 8.9239043865252512  | O79  |
| 2.4901070402959427  | 11.2788730184085182 | 18.2662497994170998 | O80  |
| 11.0287362141882941 | 3.5312491143353992  | 8.9449130432360899  | O81  |
| -3.7971515651138610 | 8.8771701675368320  | 18.2597081849815090 | O82  |
| 5.8020250071068844  | 7.6427272500932357  | 8.9399466268233265  | O83  |
| 1.4451028557954757  | 4.6374899587936458  | 18.3034913630546292 | O84  |
| 2.4649911781739871  | 11.2451274811498898 | 9.0426759216958246  | O85  |
| 4.8758224346727390  | 1.0665120035669979  | 18.4224183871067630 | O86  |
| -3.8193610683535519 | 8.8550746246546428  | 9.0920282686020073  | O87  |
| 11.0754178390644924 | 3.5569167186374515  | 18.3437291703868368 | O88  |
| 1.3987695917481764  | 4.6143988121000010  | 9.0755174086763812  | O89  |
| 5.8357496564442224  | 7.7028127606143100  | 18.4235489787962301 | O90  |
| -1.1736777152877589 | 5.0458818664788749  | 18.5207808385344492 | O91  |
| 8.4364318350771832  | 7.3692631825687824  | 8.9566444071418339  | O92  |
| -2.1044902469808777 | 10.9237893495539033 | 18.3923955490878157 | O93  |
| 9.4929690073513875  | 1.3763117347184612  | 9.0106501404264350  | O94  |
| 3.4268312508569050  | 8.8053863982504286  | 18.4470926758250791 | O95  |
| 3.7742007446300905  | 3.4633611108489113  | 8.9892546398230806  | O96  |
| 8.4705056718800975  | 7.3922738111561470  | 18.3966183555415093 | O97  |
| -1.2108382569908596 | 5.0271003348821717  | 8.8340952524885399  | O98  |
| 9.5315037926312876  | 1.4086364133142881  | 18.3218562905574451 | O99  |
| -2.1420594111399947 | 10.8997050495604011 | 8.8618360149565412  | O100 |
| 3.8139505074956208  | 3.4913952372283488  | 18.3542039890485107 | O101 |
| 3.4013541793476865  | 8.7741291800982459  | 8.8493612314174577  | O102 |
| 6.1259426378912920  | 3.0211976597833203  | 10.1709065373415726 | O103 |
| 1.1420970248652536  | 9.2776295708494452  | 17.1575695531678392 | O104 |
| 8.6983874665550740  | 3.6120396558971426  | 10.2280732581414249 | O105 |
| -1.4288260710394636 | 8.7104957339734970  | 17.0710972910649907 | O106 |
| 6.8956394040148759  | 5.5435618283074914  | 10.1449686516601005 | O107 |
| 0.3477192186339955  | 6.7535177216654043  | 17.1437183385056287 | O108 |
| 1.1522354166090309  | 9.2500192433220363  | 10.1961921650554430 | O109 |
| 6.1479511974676413  | 3.0336001491676670  | 17.1333068051561881 | O110 |
| -1.4362991711434838 | 8.7432405299519260  | 10.2532187774060422 | O111 |
| 8.7153568710824203  | 3.6459461142285874  | 17.0945521852772728 | O112 |

---



---

|                     |                     |                     |      |
|---------------------|---------------------|---------------------|------|
| 0.2985108268343080  | 6.7498937876093557  | 10.2011588858802220 | O113 |
| 6.8963674606216561  | 5.5568617261303483  | 17.2645873487545636 | O114 |
| 3.9752382011508329  | 2.0086990871406494  | 11.2204336093706853 | O115 |
| 3.4063441601279942  | 10.0280917936386409 | 16.0996249270019867 | O116 |
| 10.6831575780682968 | 2.2621938524018907  | 11.2349388293193257 | O117 |
| -3.2450775135436665 | 10.3209162548146143 | 16.0903430736427957 | O118 |
| 7.1187820599256542  | 7.8943652003581812  | 11.2223434630163190 | O119 |
| -0.1479810717789163 | 4.3751769447128215  | 16.1758303552906035 | O120 |
| 3.4447031594505315  | 10.0060598288389748 | 11.1969034776172531 | O121 |
| 3.9754645276541885  | 2.0239611288867541  | 16.1320093609640267 | O122 |
| -3.2510984613262095 | 10.3759543111997541 | 11.2089213115510660 | O123 |
| 10.6706194458283932 | 2.2612574292318306  | 16.0791471361332086 | O124 |
| -0.1987112802779252 | 4.3860453074686117  | 11.1987835378028144 | O125 |
| 7.1460480547148260  | 7.8904771334447990  | 16.1350942558700972 | O126 |
| -4.8339618663511610 | 12.4403710285532565 | 11.7789530677132142 | O127 |
| 4.5224680763288534  | 12.3787818647281824 | 15.6645718469487711 | O128 |
| 13.2763009204395548 | 1.9874911695639104  | 11.8165899366867233 | O129 |
| 8.6020649122211896  | 10.0303685073142379 | 15.6370700010464727 | O130 |
| 6.0118689983092022  | 10.2379297987289331 | 11.8359200789849695 | O131 |
| 1.4253513130117652  | 2.3504703339481083  | 15.5824089915005217 | O132 |
| 4.5017358166484955  | 12.3779171942539588 | 11.6561620723933128 | O133 |
| -4.7880624523468311 | 12.4286659777432398 | 15.5804740964301960 | O134 |
| 8.6180647055575061  | 10.0027242883725034 | 11.6954891123688611 | O135 |
| 13.2650253881772215 | 1.9998609105376062  | 15.5443858963905672 | O136 |
| 1.4355360784085172  | 2.3974698270118364  | 11.7734580200854015 | O137 |
| 5.9903740577459841  | 10.2122164664494726 | 15.5113330560333953 | O138 |
| 3.1610018696118130  | 1.6519826188540645  | 13.6731171831649156 | O139 |
| 4.1124449935361946  | 10.6496635583398351 | 13.6580551923262963 | O140 |
| 11.3971589022267654 | 1.6137908200882045  | 13.6622780922786191 | O141 |
| -4.1398813149868445 | 10.6835169156944207 | 13.6610657112921725 | O142 |
| 7.2904545759381145  | 8.7816313645613544  | 13.6738258132498078 | O143 |
| -0.0427551993401338 | 3.5454743598624772  | 13.6826279432542464 | O144 |
| 0.1284921502869230  | 8.1264725371548998  | 26.2736533006990172 | O145 |
| 7.2107931297178034  | 3.8299876685644074  | 26.3575841442733285 | O146 |
| 5.0935016669653823  | 2.7948463175280214  | 4.5660397568326845  | Si1  |
| 2.0816079552533173  | 9.5912196664651344  | 22.7466496458949692 | Si2  |
| 9.4003566137997741  | 2.8582673125120159  | 4.4951392650303292  | Si3  |
| -2.1078571945044158 | 9.4379200015656437  | 22.8389465873599988 | Si4  |
| 7.1930442546296849  | 6.5508299113081758  | 4.5718153163469388  | Si5  |
| 0.1373175924236936  | 5.7756223697503284  | 22.7625518930366830 | Si6  |
| 2.1252895409773949  | 9.5149974895588834  | 4.5761104161565038  | Si7  |
| 5.1463347185627288  | 2.7452616227886639  | 22.7791566310186120 | Si8  |
| -2.1516572719865987 | 9.4305175284536507  | 4.5255398431837177  | Si9  |
| 9.4404486922087099  | 2.9297840745371815  | 22.8528849742436400 | Si10 |

---

---

|                     |                     |                     |      |
|---------------------|---------------------|---------------------|------|
| 0.0596384545483883  | 5.7641613078166616  | 4.5714547485691037  | Si11 |
| 4.6721205456842094  | 2.3928852524274840  | 9.8124252167783670  | Si12 |
| 2.6214164645613955  | 9.8474672665199385  | 17.5062556047156690 | Si13 |
| 9.9753365044685331  | 2.6824034999915822  | 9.8419834728853175  | Si14 |
| -2.6510356397691841 | 9.7075423717467206  | 17.4683722454001824 | Si15 |
| 7.0748648217928443  | 7.1203551813208863  | 9.8024965603786089  | Si16 |
| 0.1177912757419395  | 5.1954520524774566  | 17.5504641065152072 | Si17 |
| 2.6231047555643556  | 9.8229939717761798  | 9.8114897019628469  | Si18 |
| 4.7010006275117346  | 2.4159813634458471  | 17.5259967503630918 | Si19 |
| -2.6699845681873975 | 9.7217830147167206  | 9.8444496907706078  | Si20 |
| 9.9896653707586740  | 2.7163694529875042  | 17.4765168029489466 | Si21 |
| 0.0716632301897531  | 5.1871315269340830  | 9.8160376500839597  | Si22 |
| 7.1002853617686155  | 7.1360261045010418  | 17.5724508289407240 | Si23 |
| 2.7350022331635713  | 1.4927970399501782  | 12.1130797053064772 | Si24 |
| 4.5120738241960527  | 10.8152352167760242 | 15.2248970519616478 | Si25 |
| 11.7732848386497615 | 1.4378161851792828  | 12.0937421894349892 | Si26 |
| -4.5019884975776199 | 10.8635547955825373 | 15.2340710873033238 | Si27 |
| 7.2539062320903600  | 9.2328735122398538  | 12.1134265517179447 | Si28 |
| 0.0156682595689379  | 3.0717402229600306  | 15.2379866409160716 | Si29 |
| 4.5193006398948761  | 10.8161656350426263 | 12.0931000283276884 | Si30 |
| 2.7508206635326933  | 1.4858913061465142  | 15.2340726750796716 | Si31 |
| -4.5109979199347006 | 10.8770144160565287 | 12.0911634704350579 | Si32 |
| 11.7695575513305695 | 1.4421580956305982  | 15.2306547188771049 | Si33 |
| 0.0078359324710846  | 3.0772594041415218  | 12.1239962686960308 | Si34 |
| 7.2508536182399057  | 9.2264336327801821  | 15.2366911050401512 | Si35 |
| -1.4586038375410233 | 12.3621393096758752 | 5.1307510261369691  | Si36 |
| 8.9224920663753906  | 0.0449705820696795  | 22.1115730736007059 | Si37 |
| 11.5930397517302755 | 4.8920393963587872  | 5.1273677584786403  | Si38 |
| 10.0333301208968209 | 7.6441472237129018  | 22.1671224354506542 | Si39 |
| 4.3235665378113346  | 7.4387104876141841  | 5.1330917029236502  | Si40 |
| 2.9054847712505532  | 4.7447246616252272  | 22.1508034641526024 | Si41 |
| 1.6887928182181504  | 12.4431405995805626 | 5.2037926349776882  | Si42 |
| -1.4425511051067081 | 12.3886670535886463 | 22.1752254460034628 | Si43 |
| 9.9798843256911773  | 7.5942420002644777  | 5.2071693689479135  | Si44 |
| -2.7651212060296571 | 4.9344411443863780  | 22.2081595263914018 | Si45 |
| 2.8056729113440895  | 4.6857424694901502  | 5.2129503469007341  | Si46 |
| 4.3413493631966888  | 7.5544651041651987  | 22.2185229406671674 | Si47 |
| -1.4998901284545330 | 12.2961198588314868 | 8.3500426621162713  | Si48 |
| 8.8884313562154311  | 0.0360728362162166  | 18.8916224958039756 | Si49 |
| -2.7515405382731011 | 4.8889722151670698  | 8.3477969707848292  | Si50 |
| 9.9904047855627400  | 7.5474283379537912  | 18.9430284681148677 | Si51 |
| 4.2948970525207617  | 7.5167561320139686  | 8.3537359847099264  | Si52 |
| 2.9443889253450939  | 4.7347761802954933  | 18.9279441536076547 | Si53 |
| 8.8598422378426349  | 0.0035268946050071  | 8.4287387617172520  | Si54 |

---

|                     |                     |                     |      |
|---------------------|---------------------|---------------------|------|
| -1.4728127263687751 | 12.3015492511147464 | 18.9623317663997817 | Si55 |
| 9.9613614485119797  | 7.5243743813042370  | 8.4308494367321707  | Si56 |
| -2.7203976435605690 | 4.9014038599373615  | 18.9971439566237947 | Si57 |
| 2.8889720841598967  | 4.7034371852875250  | 8.4381264305189951  | Si58 |
| 4.3219078828204527  | 7.5684467968380575  | 18.9963411381095391 | Si59 |
| 7.2215814643097413  | 4.0680257559221928  | 2.6748851816369412  | Si60 |
| 0.0220629233897336  | 8.2308639905267942  | 24.6553745055604487 | Si61 |
| 0.0216256755046906  | 8.2281768855272563  | 2.6910169606697574  | Si62 |
| 7.2323786987750172  | 3.9715396225411506  | 24.7268617216802440 | Si63 |
| 7.2325491489689284  | 4.0624063262317822  | 6.4107917942729440  | Si64 |
| 0.0327821051755866  | 8.2512917211488439  | 20.8997891895412344 | Si65 |
| 0.0027180107104208  | 8.2371842160998323  | 6.4378715921260801  | Si66 |
| 7.2403852942419222  | 4.0762514222741508  | 20.9396909118210175 | Si67 |
| 7.2546382902706839  | 4.0506369200850392  | 9.6366656950291922  | Si68 |
| 0.0040378745997751  | 8.2466060576136115  | 17.6724418946604764 | Si69 |
| -0.0065988678143460 | 8.2491038626885125  | 9.6685270520209716  | Si70 |
| 7.2713519100419948  | 4.0488362509910187  | 17.7242376086119613 | Si71 |
| 7.1908784283303664  | 6.5428291983035383  | 22.8450764297556006 | All  |
| 7.7810087360867044  | 4.4740788981491972  | 0.5275453446644393  | H1   |
| 0.0227029386026310  | 8.9343793780435679  | 0.5482715759171681  | H2   |
| -0.0404975303068369 | 8.9221419983202406  | 26.8006330249018525 | H3   |
| 7.0287751174785349  | 4.6480393772140545  | 26.8439445197866000 | H4   |
| 6.3840094142191228  | 9.2228686707689498  | 22.9867156824973122 | H5   |
| 5.5409044056661481  | 11.0707435960612290 | 21.6117763972336476 | H6   |
| 7.2776357902842870  | 10.6511265216001458 | 21.1125411203104179 | H7   |
| 6.1140597644321693  | 10.6711130483458536 | 24.0056556274387383 | H8   |
| 7.8336917030819180  | 10.1757850592523997 | 23.5197499901474636 | H9   |
| 1.9807490682786963  | 0.4734213514237687  | 22.1668544639363425 | H10  |
| 2.6375770193738681  | 0.4687068620688153  | 19.7662367962361465 | H11  |
| 0.8984206726896222  | 0.7061187517447686  | 17.9990354690129521 | H12  |
| 12.9468056215179903 | 1.0300768246650258  | 18.6150002726129742 | H13  |
| 12.2777418192270797 | 1.0830253140724040  | 21.0193916860943091 | H14  |
| -0.4185184663675252 | 0.8391947228118427  | 22.7936723787714293 | H15  |
| 6.5622117145071153  | 10.8386226035714017 | 21.9164448768224567 | C1   |
| 6.7943949997125381  | 10.3356980105569267 | 23.2136640307405884 | C2   |
| 1.2196140613622024  | 0.5716940348189792  | 21.3893400011960324 | C3   |
| 1.5878271040735106  | 0.5704646393406960  | 20.0460963493147055 | C4   |
| 0.6094485958528733  | 0.7189496193552146  | 19.0525388821050470 | C5   |
| 13.6959351598835468 | 0.8958268547569320  | 19.3971589368256474 | C6   |
| 13.3205616213539493 | 0.9171996689006157  | 20.7377644662747898 | C7   |
| -0.1416264996348796 | 0.7130357146660899  | 21.7452091590670662 | C8   |
| Benzene             |                     |                     |      |
| 14.8747817779742277 | 15.0159289811664607 | 14.9340037495855853 | C1   |
| 14.8194535895164741 | 15.0460844130526290 | 13.5378262259756834 | C2   |

|                     |                     |                     |     |
|---------------------|---------------------|---------------------|-----|
| 13.5909465638813103 | 15.2035697628956008 | 12.8905707169376491 | C3  |
| 12.4176895985957358 | 15.3309977718984332 | 13.6392709920262813 | C4  |
| 12.4729793374717879 | 15.3009849661937007 | 15.0352484767070766 | C5  |
| 13.7015495267721974 | 15.1433452685087673 | 15.6826933646248694 | C6  |
| 15.8347823972974080 | 14.8930540806239726 | 15.4398503569640653 | H1  |
| 15.7363220125607057 | 14.9465311305411479 | 12.9527926728653888 | H2  |
| 13.5477558331395116 | 15.2271353540732139 | 11.7995227630840951 | H3  |
| 11.4577874687922510 | 15.4541468345409090 | 13.1333074913551133 | H4  |
| 11.5563315601882639 | 15.4005687215114175 | 15.6204594264487433 | H5  |
| 13.7449209038101809 | 15.1199529549939022 | 16.7736512734254433 | H6  |
| Ethene              |                     |                     |     |
| 7.5959525110550894  | 7.5381113697452600  | 8.9933525036072606  | C1  |
| 8.8334480709290411  | 8.0260975619365134  | 8.9051175573863759  | C2  |
| 7.2695825598119894  | 6.6872321303281277  | 8.3909107506625631  | H1  |
| 6.8553816885419101  | 7.9674928126990405  | 9.6714036937492622  | H2  |
| 9.5739658449000125  | 7.5963770993474595  | 8.2270390104358473  | H3  |
| 9.1598692197619869  | 8.8766889359436991  | 9.5075261841586602  | H4  |
| Ethylbenzene        |                     |                     |     |
| 8.7499067117926312  | 8.4858110434975629  | 8.0761682259737793  | C1  |
| 10.1405121572237249 | 8.3892327979390267  | 8.1398843177451781  | C2  |
| 10.7857059366416550 | 8.3379798129448872  | 9.3789178781457156  | C3  |
| 10.0268346332116440 | 8.3913305804318075  | 10.5495231067824093 | C4  |
| 8.6343832787724732  | 8.4904009838539967  | 10.4796496752156845 | C5  |
| 7.9728071425766691  | 8.5340030242239884  | 9.2444918417731099  | C6  |
| 6.4669338172402426  | 8.6363825208372873  | 9.1665215077844060  | C7  |
| 5.9662974032089888  | 10.0231982978214091 | 8.7371178962777876  | C8  |
| 8.2550375494972048  | 8.5149757546110081  | 7.1007072752753944  | H1  |
| 10.7232989874297377 | 8.3449977081458986  | 7.2173554620836136  | H2  |
| 11.8728720964927383 | 8.2509757021082759  | 9.4302157270112499  | H3  |
| 10.5187920160624522 | 8.3489349451456203  | 11.5237453356515775 | H4  |
| 8.0470442319274191  | 8.5236284188347859  | 11.4019904799247289 | H5  |
| 6.0354314370992883  | 8.3785424683923946  | 10.1472194589766591 | H6  |
| 4.8676157576991503  | 10.0419078337689918 | 8.6750212482610713  | H7  |
| 6.3650826365025877  | 10.3010588214348289 | 7.7500065398984246  | H8  |
| 6.2818985630565374  | 10.7973360183685241 | 9.4524046189745761  | H9  |
| 6.0902658815649806  | 7.8825424856397586  | 8.4543909682447396  | H10 |

**Table S14.** Cartesian coordinates of all the optimized intermediates for the alkylation of benzene with propylene.

| H-MWW               |                    |                     |    |
|---------------------|--------------------|---------------------|----|
| 7.0511269792453612  | 4.2430713042060493 | 0.9107988091997012  | O1 |
| -0.0027996337905734 | 8.3426425484340481 | 0.9252122950255126  | O2 |
| 5.7888269944769721  | 3.5776009877477821 | 3.0884051843247020  | O3 |
| 1.2991199778209204  | 9.1868943119309137 | 24.0278942579153565 | O4 |

|                     |                     |                     |     |
|---------------------|---------------------|---------------------|-----|
| 8.4646824791010360  | 3.4439686457529373  | 3.0548313198835553  | O5  |
| -1.3482840956980606 | 9.2895692100277074  | 24.0480410264238849 | O6  |
| 7.2577464218965551  | 5.8153550215405581  | 3.0869956075548957  | O7  |
| -0.0943833929769413 | 6.9103824998967838  | 24.0080999086065781 | O8  |
| 1.1951135105584259  | 9.3664496222266180  | 3.1119529959325356  | O9  |
| 5.9387892934369138  | 3.2004366241409272  | 24.0056691458721190 | O10 |
| -1.4473140520347831 | 9.0741422681952049  | 3.0742975355310551  | O11 |
| 8.5685808243701853  | 3.6510988910626723  | 24.0659956927381273 | O12 |
| 0.1348299629007714  | 6.9107885955026669  | 3.0965446804080865  | O13 |
| 6.8348505790340273  | 5.6965556075253430  | 24.1876117440305620 | O14 |
| 4.9518433211989930  | 1.3993879014452668  | 4.3707260591735633  | O15 |
| 2.0398026889373453  | 11.3939295802954792 | 22.7206845364311505 | O16 |
| 10.7776714524489989 | 3.7768814902915748  | 4.3351313438322601  | O17 |
| -3.6364848066561182 | 8.9502756311314293  | 22.7310256285147503 | O18 |
| 5.7896108994655053  | 7.6296269120796367  | 4.3876639777474091  | O19 |
| 1.4010407628921842  | 5.1538237790978769  | 22.6971959243988017 | O20 |
| 2.3723871500796392  | 11.2958808712965677 | 4.5100927278024354  | O21 |
| 4.5838794518099055  | 1.4122909061267281  | 22.5913593156697665 | O22 |
| -3.7262774458285270 | 9.0897785102433506  | 4.4544371965743492  | O23 |
| 10.8530690885326351 | 3.6530866411738505  | 22.6979496188574323 | O24 |
| 1.2244399561850781  | 4.9235394847462581  | 4.4966965118455251  | O25 |
| 5.8488264480217076  | 7.9986913198091241  | 22.7362092872884602 | O26 |
| -1.2361346374276778 | 4.9077274937836890  | 22.6583013046153283 | O27 |
| 8.4230858949799021  | 7.7753945902719508  | 4.4533638977395436  | O28 |
| -2.4608677591822872 | 11.2911773799535524 | 22.7019824119207208 | O29 |
| 9.5630431327373326  | 1.4338863826731241  | 4.4189280487224414  | O30 |
| 3.5745314676184039  | 9.2547292279997500  | 22.6668190208976732 | O31 |
| 3.5143324019003903  | 3.6096381579454517  | 4.4727554568534140  | O32 |
| 8.5923662344872085  | 7.5642871636349920  | 22.7969136120844773 | O33 |
| -1.4056736030334940 | 5.1189160548663635  | 4.3153589463837960  | O34 |
| 9.3184801467181586  | 1.5104872536676943  | 22.6776857862904571 | O35 |
| -2.2529394133653664 | 11.2811590289891086 | 4.3285965400513486  | O36 |
| 3.7106316852011476  | 3.9057847820257665  | 22.7312305450296748 | O37 |
| 3.5060470385455584  | 8.9165344757427327  | 4.3700790921008652  | O38 |
| 5.8456408956990904  | 3.4919461581195006  | 5.7599227874270138  | O39 |
| 1.2986797530658452  | 9.2056962642667379  | 21.3411078786141921 | O40 |
| 8.5219338562586380  | 3.5059661347363744  | 5.7282134399245610  | O41 |
| -1.3642874091636870 | 9.2599764476294038  | 21.3698732932529616 | O42 |
| 7.1711256087837238  | 5.8150349463022062  | 5.7612424949871208  | O43 |
| -0.0696281848468345 | 6.9110565690846837  | 21.3352890385557181 | O44 |
| 1.2659716881167160  | 9.2311850877355486  | 5.7847095367338062  | O45 |
| 5.9106489821775083  | 3.2875441631129174  | 21.3088216453493260 | O46 |
| -1.4069023868244446 | 9.1868820402701221  | 5.7490105488571501  | O47 |
| 8.5448218228771751  | 3.7279872342524460  | 21.3822104728365261 | O48 |

---

|                     |                     |                     |     |
|---------------------|---------------------|---------------------|-----|
| -0.0328151900038778 | 6.8936054746552671  | 5.7659636220027499  | O49 |
| 6.8260106048718274  | 5.7907026298422073  | 21.2973224468939826 | O50 |
| 7.2128367772246200  | 4.2521720178877169  | 7.8775710074469290  | O51 |
| -0.0671184299462055 | 8.4674242689395047  | 19.2124429732934026 | O52 |
| -0.0959404243819684 | 8.4367062639433321  | 7.8992185477363721  | O53 |
| 7.1802178263826253  | 4.1958902268691878  | 19.1863661017711138 | O54 |
| 5.5714264451625111  | 0.0624742030037174  | 6.5843012083759076  | O55 |
| 8.6493008551163051  | 0.1681361747706613  | 20.4790174273661805 | O56 |
| -2.8234533875329948 | 4.9847437689681025  | 6.5610281869629956  | O57 |
| -4.4465832427367626 | 7.7153289825703357  | 20.5241454170514288 | O58 |
| 4.3457930392024284  | 7.7752151443190138  | 6.6203538431027553  | O59 |
| 2.8845885554832882  | 5.0838165223277958  | 20.4885616719551287 | O60 |
| 8.9063699331713657  | 0.1870172590646109  | 6.6697076846379995  | O61 |
| 5.3304457708123749  | 0.0291882804628962  | 20.4295225475323399 | O62 |
| -4.5316559510476537 | 7.8361077453670918  | 6.6601261361283424  | O63 |
| -2.7121873088858233 | 4.7785424509679766  | 20.4616901958239019 | O64 |
| 2.7056107872137072  | 4.8123602969817805  | 6.6992399057020364  | O65 |
| 4.4699542833745740  | 8.0635520460996997  | 20.4470121560431011 | O66 |
| 7.2707108881750271  | 0.0953565510570665  | 4.5627722919343388  | O67 |
| 6.9729612195875266  | 0.2385781135887961  | 22.5206496944778713 | O68 |
| -3.7186957451758804 | 6.4317456173969676  | 4.5416090675393130  | O69 |
| -3.4750028739110466 | 6.3114314787183572  | 22.5233973267510024 | O70 |
| 3.5168136240761250  | 6.2632154415693151  | 4.6142193646505296  | O71 |
| 3.6540810322088895  | 6.5611399881106252  | 22.5279696330947772 | O72 |
| 7.1970450204242313  | 0.1010195509736544  | 8.6979266182428301  | O73 |
| 7.0170569001645005  | 0.1447652889924168  | 18.3749581745869577 | O74 |
| -3.6330150392304348 | 6.3778638096983507  | 8.6861904331288180  | O75 |
| -3.5410551753128767 | 6.2952682049945379  | 18.4430164727616699 | O76 |
| 3.5617373818154636  | 6.3160839620981752  | 8.7134091841684036  | O77 |
| 3.6287038920256380  | 6.5642691625415370  | 18.4140861668178175 | O78 |
| 4.7871744536014322  | 1.2598398410511162  | 8.7788388164366875  | O79 |
| 2.1659952099609363  | 11.4180416434979879 | 18.3106802525546186 | O80 |
| 10.9411490260350064 | 3.7017158008912565  | 8.7358113530407469  | O81 |
| -3.6682161692663238 | 8.9532133152116700  | 18.3582097022186908 | O82 |
| 5.7779715510055425  | 7.8103645671969923  | 8.8116648440143646  | O83 |
| 1.3868281144992225  | 5.1199767360123509  | 18.3469839509539447 | O84 |
| 2.3618513346881302  | 11.3927460786027357 | 8.8702787338563809  | O85 |
| 4.6779308899588745  | 1.4385535580967035  | 18.2863866621500257 | O86 |
| -3.8652002422412206 | 9.0402864083657537  | 8.9096481269174586  | O87 |
| 10.9280246545624671 | 3.6228264595353417  | 18.2262320540255196 | O88 |
| 1.3440678227125131  | 4.8354016928623063  | 8.9555416394549372  | O89 |
| 5.9258525336159318  | 7.9495649564406872  | 18.2598467940945355 | O90 |
| -1.2415074953321827 | 4.9490506239528411  | 18.2834860908842245 | O91 |
| 8.4047790962833808  | 7.5418431500123528  | 8.8130044607054057  | O92 |

---

---

|                     |                     |                     |      |
|---------------------|---------------------|---------------------|------|
| -2.5021125429724478 | 11.3105781257020190 | 18.1888630255863859 | O93  |
| 9.4493225062289259  | 1.5235639282111653  | 8.8718935110233623  | O94  |
| 3.6221639578353839  | 9.2299528599266143  | 18.2611870855231793 | O95  |
| 3.7018610394698075  | 3.6625705602787604  | 8.8527673101890230  | O96  |
| 8.5299814100982871  | 7.5195240747234617  | 18.3652797623902302 | O97  |
| -1.2669471531110603 | 5.1482652868195782  | 8.6602600166731847  | O98  |
| 9.2724151891311948  | 1.5704120993500492  | 18.3592851907329759 | O99  |
| -2.2383873042025080 | 11.1163593070362534 | 8.6783299115070243  | O100 |
| 3.7523521083252813  | 3.9066034857948604  | 18.3222968637431336 | O101 |
| 3.3950153750285921  | 8.9695976085690390  | 8.7483445130073285  | O102 |
| 6.0559698352450315  | 3.2313999239236941  | 10.0360295315322272 | O103 |
| 1.2556195061188777  | 9.2516247104291871  | 17.0450379709011095 | O104 |
| 8.6390367282575937  | 3.7646631443189364  | 10.0642562582373039 | O105 |
| -1.3757752353814996 | 9.2034143195484788  | 17.0167826105163371 | O106 |
| 6.8849468435510648  | 5.7360518514294041  | 10.0546662535272358 | O107 |
| -0.0173848388159934 | 6.9506260315594890  | 17.0233696967144645 | O108 |
| 1.1139485172781489  | 9.3777289294135144  | 10.0700655290805035 | O109 |
| 5.9755541513246984  | 3.3605434003797439  | 16.9695128565202715 | O110 |
| -1.4932077334696476 | 8.9916303514984168  | 10.0986191422472391 | O111 |
| 8.5883816119936540  | 3.7423945567499914  | 16.9745618703062391 | O112 |
| 0.1436830322121438  | 6.9245683359326069  | 10.0691046784719020 | O113 |
| 6.9484053706399482  | 5.8111601132816100  | 17.0672242145792588 | O114 |
| 3.9163851185047656  | 2.2071511269434358  | 11.0886688699864511 | O115 |
| 3.2126754119476386  | 10.6220638688462543 | 16.0204236067495600 | O116 |
| 10.6683349682473114 | 2.4698384416065688  | 11.0557408440395282 | O117 |
| -3.5648812177178768 | 10.1813994557443106 | 16.0191816287458835 | O118 |
| 7.1039586959485721  | 8.1123960883082376  | 11.0823087498259696 | O119 |
| 0.1959225381005023  | 4.5388080191340023  | 16.0643965886519595 | O120 |
| 3.3509437736975185  | 10.2512355972883569 | 11.0716574605486535 | O121 |
| 3.6585714230566380  | 2.5323393565865833  | 16.0711237625343557 | O122 |
| -3.3542579050065462 | 10.5866525617944696 | 11.0220067484853050 | O123 |
| 10.4472844215626601 | 2.1281120931330353  | 16.0616005164628390 | O124 |
| -0.2867131577032405 | 4.5438744880176740  | 11.0465076012345236 | O125 |
| 7.4165548432180319  | 8.1919203823766491  | 16.0614425308517177 | O126 |
| 2.3519958509628149  | 0.1488920403816746  | 11.7535816629850220 | O127 |
| 12.0502044372248278 | 0.1198354583473828  | 15.3311904928886999 | O128 |
| -1.2192258213883349 | 2.1774563219934535  | 11.8088721410699016 | O129 |
| -6.0925218315359446 | 10.5801348546124654 | 15.2953503990077451 | O130 |
| 5.9228249531465762  | 10.4238251704169631 | 11.6912544073206117 | O131 |
| 1.1293768437261360  | 2.1583402838261607  | 15.3193872195633567 | O132 |
| 11.6453762287868265 | 0.0934059421398786  | 11.6274092198988210 | O133 |
| 2.7808946635242577  | 0.1154540108336954  | 15.4874241738001981 | O134 |
| -5.8959403302427429 | 10.2386141220874709 | 11.6529306043714094 | O135 |
| -1.4620734317438653 | 2.5814856214915012  | 15.4642561725836565 | O136 |

---

---

|                     |                     |                     |      |
|---------------------|---------------------|---------------------|------|
| 1.3751229815934114  | 2.5852452201194565  | 11.6406352668404232 | O137 |
| 5.7541311820384093  | 10.1574167139015650 | 15.5000765141982662 | O138 |
| 3.1256448509483530  | 1.9489310955541559  | 13.5673794790203761 | O139 |
| 4.0388130068260599  | 10.7865242064931053 | 13.5484671140372850 | O140 |
| 11.2135106500830801 | 1.9139061300140687  | 13.5541786116054368 | O141 |
| -4.0923935929206046 | 10.8186607942978359 | 13.5347254753791262 | O142 |
| 7.1506246446021020  | 8.9548617359662686  | 13.5574095066393827 | O143 |
| -0.0319221818675888 | 3.8013893253189490  | 13.5594286819875389 | O144 |
| -0.0444121069718895 | 8.3254485417636808  | 26.1963011634219036 | O145 |
| 7.1947199292710771  | 3.9619085201942603  | 26.2535836691478330 | O146 |
| 5.0278440639190833  | 3.0205980421205090  | 4.4152652742753995  | Si1  |
| 2.0177576248655438  | 9.7788889764170168  | 22.6978703359576564 | Si2  |
| 9.3292043162026683  | 3.0424773537086574  | 4.3765158652364615  | Si3  |
| -2.2037519184185479 | 9.6891873679023313  | 22.7166932914151225 | Si4  |
| 7.1577444739926213  | 6.7552949338906156  | 4.4144394910349938  | Si5  |
| -0.0065248060929655 | 5.9692756884182883  | 22.6814945744713974 | Si6  |
| 2.0838961553226349  | 9.6970437902753375  | 4.4379813110004251  | Si7  |
| 5.0485074775570107  | 2.9758605451888096  | 22.6688243329608952 | Si8  |
| -2.2041228963712847 | 9.6587177991671282  | 4.3944018662958388  | Si9  |
| 9.3050961307821325  | 3.1404469276016842  | 22.7125762053289542 | Si10 |
| -0.0216655039716560 | 5.9637720141231227  | 4.4119761408519294  | Si11 |
| 4.6041178719068032  | 2.5987357121319539  | 9.6783950162217902  | Si12 |
| 2.5653075571518258  | 10.1295066822684454 | 17.4171631717728062 | Si13 |
| 9.9243467200923661  | 2.8509541255749911  | 9.6718025235940761  | Si14 |
| -2.7787174525948570 | 9.9177573663225083  | 17.4094700458532365 | Si15 |
| 7.0538235250572034  | 7.3080861112170785  | 9.6802571032602245  | Si16 |
| 0.0693025643963670  | 5.3840094953182680  | 17.4376204017001548 | Si17 |
| 2.5619748417102395  | 10.0006201137276776 | 9.6805848908417467  | Si18 |
| 4.5171136061421029  | 2.7996661602067774  | 17.4174104895054960 | Si19 |
| -2.7450445591840298 | 9.9365971076196367  | 9.6702926320944247  | Si20 |
| 9.8162352561524084  | 2.7687220760028373  | 17.4110164996998478 | Si21 |
| -0.0149953392119628 | 5.3576329486337722  | 9.6722135954722361  | Si22 |
| 7.2098712287177662  | 7.3687459416405749  | 17.4440952205068882 | Si23 |
| 2.6904604656999709  | 1.7163703283344909  | 12.0159626110130180 | Si24 |
| 4.4640169311471922  | 11.0531987899053039 | 15.0957206909167940 | Si25 |
| 11.6864560396917163 | 1.6657230277954282  | 12.0149419462781744 | Si26 |
| -4.5498378622796025 | 11.0491269534511893 | 15.0807430307157144 | Si27 |
| 7.1743631974188133  | 9.4369767244272893  | 12.0019349847405543 | Si28 |
| -0.0397740158429454 | 3.2672753744324639  | 15.0986506619841983 | Si29 |
| 4.4400633032306756  | 11.0139510011387944 | 11.9886555314131549 | Si30 |
| 2.6726854193614971  | 1.6887484898778913  | 15.1093581218471957 | Si31 |
| -4.5512791075293517 | 11.0724707158031368 | 11.9931638594060477 | Si32 |
| 11.6698895963157465 | 1.6859326809799886  | 15.1015119706997005 | Si33 |
| -0.0409882049773669 | 3.2760488239348229  | 12.0173707100232097 | Si34 |

---



|                     |                    |                     |      |
|---------------------|--------------------|---------------------|------|
| 7.1689341443256778  | 9.4701001715012918 | 15.1018587306647056 | Si35 |
| 5.6924719181102370  | 0.0845759384037610 | 4.9739857669609586  | Si36 |
| 8.5415250872517561  | 0.2187326588399282 | 22.0887382531594803 | Si37 |
| -2.9017488932038162 | 5.0802698591475393 | 4.9505034193799196  | Si38 |
| -4.3803052816414390 | 7.6216774812734842 | 22.1450985492295693 | Si39 |
| 4.2875083073380535  | 7.6430155541481337 | 5.0105419477673498  | Si40 |
| 2.9085826670793913  | 5.1546588427598357 | 22.0978766440865435 | Si41 |
| 8.8269270450968964  | 0.1281020340016939 | 5.0545967158888008  | Si42 |
| 5.4144960067381973  | 0.1227042133168886 | 22.0436374577337837 | Si43 |
| -4.4929058024928725 | 7.7789072847410150 | 5.0430223510550762  | Si44 |
| -2.7657183913691714 | 4.9180166776201846 | 22.0760645908460518 | Si45 |
| 2.7431846550499697  | 4.9064749024387426 | 5.0835067326487131  | Si46 |
| 4.2939719686884672  | 7.9508109612883837 | 22.0319300505114093 | Si47 |
| 5.6435747200134596  | 0.0131084580532875 | 8.1970920255152038  | Si48 |
| 8.5724018908924222  | 0.2047984531701634 | 18.8667636380932393 | Si49 |
| -2.8108507343657148 | 5.0603800634029508 | 8.1743740202037927  | Si50 |
| -4.3838503014723207 | 7.6123170482260578 | 18.9197422022749606 | Si51 |
| 4.2677773637804712  | 7.7080492832378580 | 8.2330726597945105  | Si52 |
| 2.9129563184387668  | 5.1681501943216643 | 18.8743690389345637 | Si53 |
| 8.7764263572871517  | 0.1737079730648523 | 8.2827893959716334  | Si54 |
| 5.4441498057669078  | 0.1116051934312817 | 18.8190432202630298 | Si55 |
| -4.5094085523253851 | 7.6947934615284330 | 8.2725432343837948  | Si56 |
| -2.7605927394271523 | 4.9202587052712721 | 18.8530605426608240 | Si57 |
| 2.8293187527642627  | 4.9135221043612836 | 8.3095898693245065  | Si58 |
| 4.4099708977981775  | 7.9342837805565543 | 18.8199941477414185 | Si59 |
| 7.1524394638414321  | 4.2767563551609058 | 2.5325560198587502  | Si60 |
| -0.0577373193770674 | 8.4365726416464568 | 24.5755996846563143 | Si61 |
| -0.0314398275222052 | 8.4366596768573388 | 2.5473830566264763  | Si62 |
| 7.1172724772497418  | 4.1691422115037309 | 24.6353738454019755 | Si63 |
| 7.1865733925838367  | 4.2664238574480846 | 6.2736464417469104  | Si64 |
| -0.0615085079390667 | 8.4575173163209652 | 20.8180587315381196 | Si65 |
| -0.0657440405743159 | 8.4368136648777909 | 6.2938669703175671  | Si66 |
| 7.1120936943863358  | 4.2847713304831156 | 20.8004175360737058 | Si67 |
| 7.1980295086161856  | 4.2463742168384648 | 9.5036970171839812  | Si68 |
| -0.0530706395277001 | 8.4679836964377220 | 17.5833866011202993 | Si69 |
| -0.0830177602193274 | 8.4330156142629757 | 9.5267249760980661  | Si70 |
| 7.1743636164217861  | 4.2823228005531213 | 17.5658090922376822 | Si71 |
| 7.1555520442581715  | 6.6304822510787353 | 22.7790802487139636 | All  |
| 7.7673800994764708  | 4.6412251060284850 | 0.3932070242299976  | H1   |
| -0.0509189252525211 | 9.1626249967659543 | 0.4107643859890184  | H2   |
| -0.2568451305991610 | 9.1152034803045119 | 26.7163126711693053 | H3   |
| 6.4747416919820875  | 4.3336201597025799 | 26.7853942756796854 | H4   |
| 6.1679946472153180  | 8.8807657830825200 | 23.0035374858163841 | H5   |

Adsorbed propylene

|                     |                     |                     |     |
|---------------------|---------------------|---------------------|-----|
| 7.0721492960345280  | 4.2164514225654912  | 0.9261954191826313  | O1  |
| -0.0150931558910594 | 8.3181648110126147  | 0.9486419698865370  | O2  |
| 5.8038283647136923  | 3.5404525620570184  | 3.0965982512090009  | O3  |
| 1.3427362636604894  | 9.0757417911706089  | 24.0051661248879640 | O4  |
| 8.4813917231466753  | 3.4372031973529831  | 3.0820091220371943  | O5  |
| -1.2972197540885135 | 9.2771278343171719  | 24.0129176418618684 | O6  |
| 7.2516631898883332  | 5.7966533617967473  | 3.0974610074096915  | O7  |
| -0.1397147020648335 | 6.8490906561834404  | 23.9954299727675426 | O8  |
| 1.1700376728627520  | 9.3557589522871307  | 3.1342445673605770  | O9  |
| 5.9305225691361283  | 3.1787683978051451  | 24.0091052033626156 | O10 |
| -1.4668199875630354 | 9.0030655061991620  | 3.1106037335219563  | O11 |
| 8.5730429748770938  | 3.5401217717310058  | 24.0289551975236577 | O12 |
| 0.1575289962949924  | 6.8764163889424621  | 3.1117630153859444  | O13 |
| 6.9050120920438562  | 5.648882589611134   | 24.1728103063390520 | O14 |
| 4.9581727388552901  | 1.3605697016592608  | 4.3785332278320439  | O15 |
| 2.0351880536670990  | 11.3088593162082205 | 22.7176822679076018 | O16 |
| 10.7843908793489405 | 3.7736044731987928  | 4.3842143733258787  | O17 |
| -3.5842082579999008 | 8.8745401087727878  | 22.7102130087116194 | O18 |
| 5.7743097710064157  | 7.6046865675535917  | 4.3892741344189945  | O19 |
| 1.4214830564392051  | 5.1301619912363350  | 22.7027128561637852 | O20 |
| 2.3868239505130875  | 11.2843288019162920 | 4.5030206085242215  | O21 |
| 4.5978126808067419  | 1.3680395134574581  | 22.5991066844042479 | O22 |
| -3.7406138045597501 | 9.0818426775513785  | 4.4983922484100454  | O23 |
| 10.8715415526332730 | 3.5700409428451620  | 22.6802816650805816 | O24 |
| 1.2210473682034850  | 4.8759821817475535  | 4.5091893852168319  | O25 |
| 5.8961209474993082  | 7.9480852408121319  | 22.7261961101833663 | O26 |
| -1.2031735603195499 | 4.8108805648397919  | 22.6285932275589872 | O27 |
| 8.4086610616010660  | 7.7559411691394198  | 4.4779629153761418  | O28 |
| -2.4690528401718641 | 11.2413341169806849 | 22.6571757286732236 | O29 |
| 9.5778580817994854  | 1.4250149838466799  | 4.4439704646718337  | O30 |
| 3.6155853966273686  | 9.2038925683879480  | 22.6469791507115339 | O31 |
| 3.5192075148230786  | 3.5734377563812978  | 4.4671856228243403  | O32 |
| 8.6499096907603352  | 7.4894894318692353  | 22.7617187855520413 | O33 |
| -1.4071425078073359 | 5.1303865140333125  | 4.3685341164962912  | O34 |
| 9.3441149895850781  | 1.4246848478525247  | 22.6126599719427190 | O35 |
| -2.2163215218006087 | 11.2378604878320623 | 4.3444441639241020  | O36 |
| 3.7149678595109883  | 3.8587707483000426  | 22.6986085005070031 | O37 |
| 3.4819277698053970  | 8.8812005529156828  | 4.3799148321105710  | O38 |
| 5.8425102161361853  | 3.4569245401941457  | 5.7659920818192854  | O39 |
| 1.3378552687799097  | 9.1152315004268125  | 21.3196496172210104 | O40 |
| 8.5182449082639220  | 3.4875461149996503  | 5.7548561684518234  | O41 |
| -1.3219289971262196 | 9.2319774509308630  | 21.3356022472538562 | O42 |
| 7.1525947465466908  | 5.7891784612285484  | 5.7701135437858584  | O43 |
| -0.0834435755704952 | 6.8523802216645464  | 21.3245734122194293 | O44 |

---

|                     |                     |                     |     |
|---------------------|---------------------|---------------------|-----|
| 1.2535290736639446  | 9.2611510327948814  | 5.8063435673361790  | O45 |
| 5.9345784594044266  | 3.2291814316728740  | 21.3095308040888156 | O46 |
| -1.4173333835176645 | 9.1284818440380278  | 5.7842013685634992  | O47 |
| 8.5714100595299119  | 3.6581754987047406  | 21.3462206046025784 | O48 |
| 0.0336993139872628  | 6.8818604272384931  | 5.7843597607171677  | O49 |
| 6.8592096817727288  | 5.7320651136186758  | 21.2865817844584768 | O50 |
| 7.1840104447315722  | 4.2323436022524845  | 7.8896639905461283  | O51 |
| -0.0381260707736519 | 8.3925424439918253  | 19.1902727527971422 | O52 |
| -0.0614283822603987 | 8.4132600549043790  | 7.9246034678060635  | O53 |
| 7.1736543192684339  | 4.1379144312255471  | 19.1728588862452725 | O54 |
| 5.5679948571741740  | 0.0276543950522419  | 6.5999490957108113  | O55 |
| 8.6348842529609353  | 0.0316322239823518  | 20.4559703005135809 | O56 |
| -2.8189709956102482 | 4.9676890077939131  | 6.6147714142890841  | O57 |
| -4.3651072355513483 | 7.6400244849188006  | 20.4989605388035940 | O58 |
| 4.3405574042585409  | 7.7382851977191969  | 6.6244505847329043  | O59 |
| 2.8716227830933052  | 5.0645547452478912  | 20.4760984961306036 | O60 |
| 8.9412699360206922  | 0.1450680962160571  | 6.6859612018824963  | O61 |
| 5.3278334655358615  | 0.0291535872247718  | 20.4131003009804388 | O62 |
| 9.8642633887243427  | 7.8461748998730192  | 6.6999374882934264  | O63 |
| -2.7042562014202303 | 4.6891355825692669  | 20.4428429616859439 | O64 |
| 2.7127237580681856  | 4.7632378889045555  | 6.7021518258256974  | O65 |
| 4.5206376507892658  | 8.0083771917288011  | 20.4394387136654245 | O66 |
| 7.2867627762979579  | 0.0864252247766666  | 4.5922767932929078  | O67 |
| 6.9791903706839262  | 0.1760842648894910  | 22.5079501844037857 | O68 |
| 10.7057367657972851 | 6.4249621973724969  | 4.6042032735333533  | O69 |
| -3.4216787435672424 | 6.2319468494072412  | 22.5113609355475646 | O70 |
| 3.5075530870859515  | 6.2275228607326731  | 4.6187710806590720  | O71 |
| 3.6842179371691999  | 6.5183963660898243  | 22.5167595276160775 | O72 |
| 7.2108387684875064  | 0.0731552637679588  | 8.6994642810573115  | O73 |
| 7.0045243380642148  | 0.0898533528441750  | 18.3502934314571284 | O74 |
| -3.6753757883098097 | 6.3662052299649421  | 8.7163579184610533  | O75 |
| -3.5148126029271523 | 6.2025328623271898  | 18.4103711359500721 | O76 |
| 3.5392467697364025  | 6.2876427701728810  | 8.7142792274201479  | O77 |
| 3.6696880530637084  | 6.5234328877589389  | 18.4007365582306051 | O78 |
| 4.7950687450736762  | 1.2191214749817776  | 8.7991929195589673  | O79 |
| 2.1288763753626494  | 11.3228278185456777 | 18.2648503438983063 | O80 |
| 10.9676416397437304 | 3.6997685624019550  | 8.8111687088184940  | O81 |
| -3.6005772232865412 | 8.8595382058467251  | 18.3184661935591748 | O82 |
| 5.7359627232798829  | 7.8087829101515371  | 8.8412402046700951  | O83 |
| 1.4033046910630351  | 5.1304569518337457  | 18.3159922823830321 | O84 |
| 2.3937184328599681  | 11.4113078416632163 | 8.9258357293138157  | O85 |
| 4.6738937171503334  | 1.3949264458704917  | 18.2419626510206569 | O86 |
| -3.8816417527472433 | 9.0251927813054511  | 8.9567575803758057  | O87 |
| 10.9377469716917979 | 3.5337294501951151  | 18.2076269079200124 | O88 |

---

|                     |                     |                     |      |
|---------------------|---------------------|---------------------|------|
| 1.3320857312832826  | 4.7934127131061590  | 8.9510002951500738  | O89  |
| 5.9721139559708023  | 7.8927995016997334  | 18.2489368429462573 | O90  |
| -1.2177766238474097 | 4.8410839016287106  | 18.2796023097518052 | O91  |
| 8.3687823403891066  | 7.5417056476423943  | 8.8440612276588322  | O92  |
| -2.5304099617015403 | 11.2654448373361475 | 18.2077737936137964 | O93  |
| 9.4318638641693955  | 1.5435486081402712  | 8.8560064909552541  | O94  |
| 3.6804985516141677  | 9.1935208143533789  | 18.2568409431784495 | O95  |
| 3.7021768894765716  | 3.6308202730941916  | 8.8593559278296237  | O96  |
| 8.5742421727174509  | 7.4652111404954722  | 18.3593886242704265 | O97  |
| -1.2772554022426732 | 5.2024267920217122  | 8.7154135260845038  | O98  |
| 9.2814969489399584  | 1.4811689985774807  | 18.3737536615588581 | O99  |
| -2.2105371037847377 | 11.0709327060222797 | 8.6951405683744429  | O100 |
| 3.7439647471827109  | 3.8622121068339164  | 18.3279330252149997 | O101 |
| 3.3399199989655077  | 8.9450776396498135  | 8.7176210558511968  | O102 |
| 6.0491215764969049  | 3.1997077534951348  | 10.0540645214777342 | O103 |
| 1.3271685517303773  | 9.0966197260635653  | 17.0228461664407860 | O104 |
| 8.6266489289560138  | 3.7748567144781910  | 10.0706743348004419 | O105 |
| -1.3043675485424284 | 9.2329053600721789  | 17.0077476226943674 | O106 |
| 6.8392880843901231  | 5.7179289338744459  | 10.0568139937661005 | O107 |
| -0.1030498589195497 | 6.8873427372571161  | 16.9953367428520963 | O108 |
| 1.1077655112522171  | 9.4042040020096156  | 10.0972829549972101 | O109 |
| 5.9602694552974693  | 3.3391530211798104  | 16.9483097042164950 | O110 |
| -1.4901752749812127 | 8.9281424350182217  | 10.1055886329704929 | O111 |
| 8.5844895737081401  | 3.6442677904833443  | 16.9744117634482805 | O112 |
| 0.2219847084388702  | 6.9151414123968484  | 10.1008058881720846 | O113 |
| 7.0031068268894137  | 5.7576297699219463  | 17.0486100577210671 | O114 |
| 3.8963982921518174  | 2.1744018982649949  | 11.0912046721112727 | O115 |
| 3.2265509551409837  | 10.5513487483289481 | 15.9987449630764047 | O116 |
| 10.6028853206469957 | 2.4220178564836381  | 11.0928357786054672 | O117 |
| -3.5321491093727144 | 10.1393948590649963 | 16.0095216423108013 | O118 |
| 7.0621275392788689  | 8.0781947713734379  | 11.1127892879716086 | O119 |
| 0.2153198114985106  | 4.4766642474416241  | 16.0542906249486350 | O120 |
| 3.4146828639310307  | 10.1777468713133423 | 11.0602418634096811 | O121 |
| 3.6313946382170785  | 2.5258714493488830  | 16.0575285157928782 | O122 |
| -3.3021294743634200 | 10.5672599645223499 | 11.0527822165645002 | O123 |
| 10.4345359910932025 | 2.0256914205079033  | 16.0632512175474282 | O124 |
| -0.2664111769315101 | 4.5322811815629933  | 11.0694544737966165 | O125 |
| 7.4657302816466453  | 8.1439848565860409  | 16.0553758479203523 | O126 |
| 2.3458903238605169  | 0.0994367010946237  | 11.7427811994716240 | O127 |
| 12.0763452118040995 | 0.0543211485509540  | 15.3325379301168709 | O128 |
| -1.2574848249676964 | 2.1646765644890764  | 11.7618169289943975 | O129 |
| -6.0739462114282574 | 10.5569156651754916 | 15.3374810561864745 | O130 |
| 5.9819542544230195  | 10.4447502945026738 | 11.6994593281403194 | O131 |
| 1.1070618539478068  | 2.0775235805202783  | 15.3166003901611614 | O132 |

---

|                     |                     |                     |      |
|---------------------|---------------------|---------------------|------|
| 11.6273896291960650 | 0.0550784754526438  | 11.6182501648190826 | O133 |
| 2.8159723955187537  | 0.0814730590323618  | 15.5038702070917989 | O134 |
| -5.8471567413932997 | 10.1601237272646738 | 11.6218349727043577 | O135 |
| -1.4767225826284125 | 2.5320687690051273  | 15.4929327206379028 | O136 |
| 1.3463219409756491  | 2.5226975241461376  | 11.6331664473108063 | O137 |
| 5.7738960294074895  | 10.0940194760617867 | 15.5181849489916424 | O138 |
| 3.1014204010696069  | 1.9022955996761144  | 13.5628337812706583 | O139 |
| 4.0795007072837377  | 10.7284289478932706 | 13.5404717604414646 | O140 |
| 11.2283360483985124 | 1.8544718099335280  | 13.5642054987998346 | O141 |
| -4.1025051360947717 | 10.7863603348261403 | 13.5432314468454091 | O142 |
| 7.1918640518231580  | 8.9498420929965778  | 13.5653722045031149 | O143 |
| -0.0592801671537750 | 3.7247613136536204  | 13.5621341399959139 | O144 |
| -0.0381761078681686 | 8.2745157751799052  | 26.1729901034984387 | O145 |
| 7.2426603041720075  | 3.9089577513657430  | 26.2328629908160593 | O146 |
| 5.0328558698325505  | 2.9828459524199533  | 4.4180570861947359  | Si1  |
| 2.0516490702223811  | 9.6912514416744688  | 22.6779828032052890 | Si2  |
| 9.3384654851031357  | 3.0334575996943420  | 4.4079007626132629  | Si3  |
| -2.1670551058046277 | 9.6457821804714428  | 22.6823399562841921 | Si4  |
| 7.1445627404046652  | 6.7333320675625989  | 4.4268842327877476  | Si5  |
| -0.0047811425010948 | 5.9100431151842283  | 22.6695623055727928 | Si6  |
| 2.0747720041711508  | 9.6885885753823420  | 4.4493510180110194  | Si7  |
| 5.0580141127693254  | 2.9357828483714199  | 22.6643210968383251 | Si8  |
| -2.2054493582852728 | 9.6153928309033780  | 4.4286299830798805  | Si9  |
| 9.3222844052351181  | 3.0552237017806374  | 22.6743988604898981 | Si10 |
| -0.0034848268921919 | 5.9432405871603970  | 4.4371759983543111  | Si11 |
| 4.5992176714536388  | 2.5638521574517998  | 9.6882160947224243  | Si12 |
| 2.5922567586268643  | 10.0396395586358977 | 17.3953686620372103 | Si13 |
| 9.9073782265966894  | 2.8464734740165381  | 9.6962023063248992  | Si14 |
| -2.7425309686964141 | 9.8772635984564801  | 17.3982889336741486 | Si15 |
| 7.0134118047518346  | 7.2930214623035949  | 9.7006136866631394  | Si16 |
| 0.0662029483302837  | 5.3292357712842424  | 17.4207047812276414 | Si17 |
| 2.5696061606091716  | 9.9894810007467303  | 9.6913091125860920  | Si18 |
| 4.5055058076479906  | 2.7720560137023900  | 17.3993818129069062 | Si19 |
| -2.7277642664132697 | 9.8998655036092487  | 9.6935642622996223  | Si20 |
| 9.8143708607765596  | 2.6759747283276565  | 17.4130209752809471 | Si21 |
| 0.0041978167410006  | 5.3541062515842803  | 9.6998095202830186  | Si22 |
| 7.2561823610478839  | 7.3136776791384914  | 17.4338223817279321 | Si23 |
| 2.6708842239042108  | 1.6693951507882945  | 12.0109312352541480 | Si24 |
| 4.4890098394197455  | 10.9882758306291066 | 15.0923980684855330 | Si25 |
| 11.6639694010862307 | 1.6264342615802643  | 12.0127138796855739 | Si26 |
| -4.5316511122781415 | 11.0167762351920189 | 15.0953394053419121 | Si27 |
| 7.2002911089771908  | 9.4147026405666701  | 12.0063400158737661 | Si28 |
| -0.0515105065168611 | 3.2001411989363446  | 15.1033216520098179 | Si29 |
| 4.4739062340088633  | 10.9780427843472967 | 11.9826229714693913 | Si30 |

---

---

|                     |                     |                     |      |
|---------------------|---------------------|---------------------|------|
| 2.6626898081519865  | 1.6471564416926086  | 15.1088177535900723 | Si31 |
| -4.5327782218950041 | 11.0298162730399589 | 11.9937158553768164 | Si32 |
| 11.6740637450311588 | 1.6160892683683010  | 15.1113155450213803 | Si33 |
| -0.0597388791784288 | 3.2337386647466997  | 12.0101547994163891 | Si34 |
| 7.2016897227541996  | 9.4353237539065589  | 15.1175710474492604 | Si35 |
| 5.7062091832633488  | 0.0529586633178698  | 4.9908545496633279  | Si36 |
| 8.5449141630066592  | 0.1277878913752845  | 22.0640976923041165 | Si37 |
| -2.9009195150816249 | 5.0779835645531550  | 5.0051694492491698  | Si38 |
| -4.3226620701408303 | 7.5399538904070171  | 22.1208166817014025 | Si39 |
| 4.2727639647487576  | 7.6102603181614850  | 5.0147436016602818  | Si40 |
| 2.9235563072095871  | 5.1263767201243731  | 22.0863153565124612 | Si41 |
| 8.8470840576161258  | 0.1114235310450126  | 5.0705333115414168  | Si42 |
| 5.4194855307587915  | 0.0835828978733524  | 22.0277069673629136 | Si43 |
| 9.9198844736153795  | 7.7728021338416680  | 5.0844837722495440  | Si44 |
| -2.7374926735065368 | 4.8287815505472986  | 22.0569054960799846 | Si45 |
| 2.7439782966961004  | 4.8640546984230717  | 5.0870558924552194  | Si46 |
| 4.3601785526246450  | 7.8998165770173063  | 22.0302685805070482 | Si47 |
| 5.6545394992247591  | -0.0240768867426666 | 8.2118784595382959  | Si48 |
| 8.5597520202082844  | 0.1124329784289084  | 18.8451475539885607 | Si49 |
| -2.8162949976397886 | 5.0654646342415246  | 8.2272347905429832  | Si50 |
| -4.3314765790977248 | 7.5332133319405816  | 18.8935804097611566 | Si51 |
| 4.2370649333326602  | 7.6849702694410036  | 8.2360569545137494  | Si52 |
| 2.9234213477866047  | 5.1450152980583450  | 18.8629951802871467 | Si53 |
| 8.7919448051775291  | 0.1641887416788389  | 8.2972918490165526  | Si54 |
| 5.4332394135098765  | 0.0753171146422910  | 18.8005837802502036 | Si55 |
| 9.8914783947077858  | 7.6907019446805380  | 8.3103642119834280  | Si56 |
| -2.7431375648775282 | 4.8267964588791301  | 18.8339092455494672 | Si57 |
| 2.8217374665237851  | 4.8761961428138285  | 8.3122411181085507  | Si58 |
| 4.4576302223417050  | 7.8876456123484129  | 18.8161561757184046 | Si59 |
| 7.1637596179226346  | 4.2544600953085743  | 2.5483198230903894  | Si60 |
| -0.0413759276560492 | 8.3773105651273134  | 24.5511843988140157 | Si61 |
| -0.0394383882898515 | 8.4022952152705894  | 2.5712002082773111  | Si62 |
| 7.1488036013108989  | 4.1156640123374597  | 24.6144253029807807 | Si63 |
| 7.1740512757204851  | 4.2419283341402698  | 6.2859246678521972  | Si64 |
| -0.0351501867294219 | 8.3935849578090522  | 20.7952188299283733 | Si65 |
| -0.0480909128959137 | 8.4208437940216978  | 6.3195164055317141  | Si66 |
| 7.1321999802233726  | 4.2264164452594049  | 20.7885686516522625 | Si67 |
| 7.1752491059126022  | 4.2302201454544139  | 9.5148181671814331  | Si68 |
| -0.0320220418225592 | 8.4023146982724004  | 17.5610187061701311 | Si69 |
| -0.0551723062215377 | 8.4150970532504026  | 9.5521940601322779  | Si70 |
| 7.1822499949823602  | 4.2248018309158279  | 17.5534549098159403 | Si71 |
| 7.1843111233809713  | 6.5965444062573004  | 22.7591658112668860 | All  |
| 7.7702346845415304  | 4.6503255488996729  | 0.4127003397183726  | H1   |
| -0.0499081207674443 | 9.1433889020534576  | 0.4415086522438256  | H2   |

---

|                     |                     |                     |     |
|---------------------|---------------------|---------------------|-----|
| -0.1285726599195822 | 9.0913061754269098  | 26.6868403663307419 | H3  |
| 6.5798889443498512  | 4.3630365882124131  | 26.7745440406192046 | H4  |
| 6.1954724158118308  | 8.8469287388282982  | 23.1010302896993878 | H5  |
| 5.8225114721443196  | 11.3537212873224220 | 22.8093053035081041 | H6  |
| 5.9916690165874389  | 10.2134178253688859 | 24.9510694288505377 | H7  |
| 7.7738655123497651  | 9.7699405937273838  | 24.6018207976788119 | H8  |
| -6.3236430653840117 | 12.0933233161328726 | 21.9417971712591893 | H9  |
| 7.6300796303290239  | 10.6002919606610106 | 21.1354905659471264 | H10 |
| -5.6167357001610148 | 10.5401904272956894 | 22.4733926088597116 | H11 |
| 7.8989612284415598  | 11.0255214734967257 | 22.1171251527822683 | C1  |
| 6.7745138447276618  | 10.8848218215369101 | 23.0886993429754845 | C2  |
| 6.8444245515983040  | 10.2415067992906792 | 24.2687796743774342 | C3  |

TS1

|                     |                     |                     |     |
|---------------------|---------------------|---------------------|-----|
| 7.0829766449139937  | 4.1937761281510140  | 0.9226860990507280  | O1  |
| -0.0151769179964898 | 8.3048053269357869  | 0.9436318180796763  | O2  |
| 5.8118488613924413  | 3.5136628200308841  | 3.0905930031749977  | O3  |
| 1.3093847976858219  | 9.0803980674208802  | 23.9939482283833527 | O4  |
| 8.4899030563575533  | 3.4266116797932131  | 3.0826727237563105  | O5  |
| -1.3376234413558832 | 9.2365843759954753  | 23.9977983921001723 | O6  |
| 7.2456813163880600  | 5.7789942503033069  | 3.0914609351494970  | O7  |
| -0.1354117436195521 | 6.8258016524118119  | 23.9972692446965645 | O8  |
| 1.1702670953544780  | 9.3479870433590655  | 3.1262512454145646  | O9  |
| 5.9234741536992388  | 3.1761450290959052  | 24.0119069333190112 | O10 |
| -1.4656737465575969 | 8.9875744857759656  | 3.1068980955255641  | O11 |
| 8.5695181569142491  | 3.5195638777187890  | 24.0253132905854336 | O12 |
| 0.1654702677468065  | 6.8657668224455080  | 3.1093083905378842  | O13 |
| 6.9180232172743636  | 5.6479819293112898  | 24.1082120385203744 | O14 |
| 4.9562408865377838  | 1.3441762469176803  | 4.3838306780645340  | O15 |
| 2.0213219249146830  | 11.2985852652718126 | 22.7065939104188708 | O16 |
| 10.7928617023468316 | 3.7590865994853879  | 4.3841176111635187  | O17 |
| -3.6223945631039589 | 8.8863081063090377  | 22.6757701451729758 | O18 |
| 5.7754179554665006  | 7.5936518291468857  | 4.3831589086880154  | O19 |
| 1.3847626736670198  | 5.0725810977130550  | 22.6812808313704934 | O20 |
| 2.3875859077777797  | 11.2733755930731405 | 4.4981741101737445  | O21 |
| 4.5861292155994278  | 1.3698764077878016  | 22.6018011623104158 | O22 |
| -3.7395870826013891 | 9.0683422039253472  | 4.4944243688886569  | O23 |
| 10.8621536286655598 | 3.5586409761120334  | 22.6698808917892976 | O24 |
| 1.2254369144537804  | 4.8620587811414255  | 4.5049459434079671  | O25 |
| 5.8723375026319102  | 7.9250700823827716  | 22.7297961475454855 | O26 |
| -1.2294329303794216 | 4.8027126115194179  | 22.6307596549657042 | O27 |
| 8.4100158708262853  | 7.7405977127153154  | 4.4639591825208109  | O28 |
| -2.4787293065869820 | 11.2364785061249677 | 22.6570769658977014 | O29 |
| 9.5817637155927038  | 1.4133853093061777  | 4.4458514660175590  | O30 |
| 3.6076465133229627  | 9.2132981092807000  | 22.6610286457905268 | O31 |

|                     |                     |                     |     |
|---------------------|---------------------|---------------------|-----|
| 3.5262983730638218  | 3.5623637785989080  | 4.4594337255987986  | O32 |
| 8.6234795822621884  | 7.5040158664876451  | 22.7294510684127005 | O33 |
| -1.4025077855439596 | 5.1210977776592062  | 4.3616436286068163  | O34 |
| 9.3486195386006301  | 1.4032886598684988  | 22.6229960228220364 | O35 |
| -2.2114120047598558 | 11.2228111850336809 | 4.3421972348998850  | O36 |
| 3.7116605215964191  | 3.8734393830262275  | 22.7015920855180227 | O37 |
| 3.4821818329066652  | 8.8693935530280132  | 4.3692666333017298  | O38 |
| 5.8502808434889104  | 3.4430947022625737  | 5.7595451987171957  | O39 |
| 1.3195102904422491  | 9.1114709960536882  | 21.3118261373624200 | O40 |
| 8.5258130523807338  | 3.4807471219567496  | 5.7549360183328950  | O41 |
| -1.3406695576247434 | 9.2227306860117917  | 21.3196453074193748 | O42 |
| 7.1540867617981743  | 5.7788464331900977  | 5.7639555558696358  | O43 |
| -0.1017154437654275 | 6.8440082451852700  | 21.3297469044720849 | O44 |
| 1.2547299503158396  | 9.2488058659603922  | 5.7986570289793375  | O45 |
| 5.9268555440032964  | 3.2285810098282370  | 21.3128088460045682 | O46 |
| -1.4164661194148369 | 9.1112906971530947  | 5.7802628019198385  | O47 |
| 8.5663954601880938  | 3.6129260221675694  | 21.3322491243622387 | O48 |
| 0.0399793423414057  | 6.8682524800644291  | 5.7819556260060914  | O49 |
| 6.9012578053150193  | 5.7231912187463552  | 21.2245188142760881 | O50 |
| 7.1835165297166839  | 4.2243155054298374  | 7.8854166093766436  | O51 |
| -0.0506092873235584 | 8.3708520575866956  | 19.1854963401674148 | O52 |
| -0.0583452108041707 | 8.4032071372238892  | 7.9204873644990110  | O53 |
| 7.1707499454177910  | 4.0627744352256494  | 19.1597279570033514 | O54 |
| 5.5668968646628141  | 0.0041338833908473  | 6.6023563214282355  | O55 |
| 8.6281869709722887  | 0.0432122674311753  | 20.4484229429116020 | O56 |
| -2.8129711412795113 | 4.9660175639946971  | 6.6093059471804967  | O57 |
| 10.0681911044852654 | 7.6220141653012465  | 20.4773865090899285 | O58 |
| 4.3364881817299628  | 7.7304772110145157  | 6.6165851415971089  | O59 |
| 2.8585068763533679  | 5.0282073813042079  | 20.4679205985461188 | O60 |
| 8.9465116174652017  | 0.1303849403013871  | 6.6855264785921218  | O61 |
| 5.3004748050390820  | 0.0228197057121615  | 20.4126351493106597 | O62 |
| 9.8563967056259258  | 7.8283543733789402  | 6.6916972563070578  | O63 |
| -2.7177420872100906 | 4.6937129110125406  | 20.4343937865563667 | O64 |
| 2.7213904935542605  | 4.7477677560065841  | 6.6958232833812694  | O65 |
| 4.4738673989160471  | 8.0285459983599257  | 20.4592361119751516 | O66 |
| 7.2883086822196468  | 0.0775836294460917  | 4.5957213565211728  | O67 |
| 6.9687355317307018  | 0.1747466695755130  | 22.4990554543738384 | O68 |
| 10.7073942042119352 | 6.4117241722557941  | 4.5948872226823534  | O69 |
| -3.4414685634298867 | 6.2288901227950149  | 22.5100039085634158 | O70 |
| 3.5102071719366661  | 6.2157440473893617  | 4.6120266410229389  | O71 |
| 3.5734338594112294  | 6.5500313183268233  | 22.5074978182976047 | O72 |
| 7.2139934624415805  | 0.0645268154092444  | 8.6980417977992772  | O73 |
| 6.9825803474249595  | 0.0838407185867187  | 18.3528354826461459 | O74 |
| 10.7549605625370539 | 6.3568462072409400  | 8.7120982119615871  | O75 |



---

|                     |                     |                     |      |
|---------------------|---------------------|---------------------|------|
| -3.5247967632845918 | 6.1853476161561840  | 18.3861266929773066 | O76  |
| 3.5396681386915620  | 6.2762288789201799  | 8.7069691737214701  | O77  |
| 3.6592249618522161  | 6.5278718283189887  | 18.4112638920394325 | O78  |
| 4.7985120716016461  | 1.2099612399143336  | 8.7967357520827854  | O79  |
| 2.0961555730739354  | 11.2982343244157200 | 18.2673855133574072 | O80  |
| 10.9670080493737334 | 3.6907609358099327  | 8.7987390538888324  | O81  |
| -3.5919103146837057 | 8.8462614187665487  | 18.3069861184384557 | O82  |
| 5.7363214591427987  | 7.7982873403054516  | 8.8288327333849654  | O83  |
| 1.3903617674414224  | 5.1404265822361213  | 18.3095511200403607 | O84  |
| 2.3962501757661725  | 11.4005442032782423 | 8.9253570065323196  | O85  |
| 4.6531321983489153  | 1.3979483076327586  | 18.2467328144279897 | O86  |
| -3.8778997803323252 | 9.0164080100348230  | 8.9425131304465690  | O87  |
| 10.9195649286166372 | 3.5142292358181733  | 18.2111214113836191 | O88  |
| 1.3322733462879071  | 4.7796541174617726  | 8.9394256500634732  | O89  |
| 5.9682716939899843  | 7.8884890610885217  | 18.2852856954592013 | O90  |
| -1.2293013034466276 | 4.8144934861335331  | 18.2681050869661590 | O91  |
| 8.3687908529318165  | 7.5393644904354638  | 8.8442384578975037  | O92  |
| -2.5570875215811091 | 11.2669721887362773 | 18.2031790870347017 | O93  |
| 9.4347661414315755  | 1.5335389453112072  | 8.8535791942665654  | O94  |
| 3.6900615505671350  | 9.1964955000174644  | 18.2472696140270223 | O95  |
| 3.7035880893133752  | 3.6196426610068486  | 8.8588212176660530  | O96  |
| 8.5739079855263185  | 7.4721939759935330  | 18.3355594007970062 | O97  |
| -1.2780439636885446 | 5.1966217984873726  | 8.7124597128040602  | O98  |
| 9.2677597553039615  | 1.4588940606007026  | 18.3410199171968706 | O99  |
| -2.2057470684538867 | 11.0616393472119512 | 8.7093194057037060  | O100 |
| 3.7294738109399432  | 3.8703697945298670  | 18.2968316923631491 | O101 |
| 3.3382973691663356  | 8.9330794198632884  | 8.7140195674411114  | O102 |
| 6.0514286139065341  | 3.1917960790878590  | 10.0519267734265849 | O103 |
| 1.3337913837673447  | 9.0615909561396553  | 17.0213690701576041 | O104 |
| 8.6285521378899546  | 3.7679515956013598  | 10.0640843411976491 | O105 |
| -1.2933401430422808 | 9.2522781333272732  | 17.0076816810883074 | O106 |
| 6.8401502801110503  | 5.7111570842216741  | 10.0513430335469955 | O107 |
| -0.1420754364251624 | 6.8783841856597627  | 16.9877843315839137 | O108 |
| 1.1062182291149716  | 9.3949654589123490  | 10.0940617883142458 | O109 |
| 5.9502999487066095  | 3.3214340101101856  | 16.9268447965361943 | O110 |
| -1.4905061744161476 | 8.9066620832444503  | 10.1016348878525211 | O111 |
| 8.5754906667321666  | 3.6388075007109442  | 16.9533668521788350 | O112 |
| 0.2313056632140271  | 6.9021748936883442  | 10.0941629167250966 | O113 |
| 6.9801695115479738  | 5.7430570883127352  | 17.0784852573135488 | O114 |
| 3.9004468024769579  | 2.1639932789259224  | 11.0913750429950149 | O115 |
| 3.2099764646091060  | 10.5555575007250919 | 15.9984806637412262 | O116 |
| 10.6080716441075964 | 2.4212930320728669  | 11.0855816441098085 | O117 |
| -3.5295297374680099 | 10.1268575812411132 | 15.9977763563402977 | O118 |
| 7.0476107814236260  | 8.0718415336669178  | 11.1078856023119563 | O119 |

---

|                     |                     |                     |      |
|---------------------|---------------------|---------------------|------|
| 0.2142779692566306  | 4.4717740079263741  | 16.0455454496149201 | O120 |
| 3.4141362549647045  | 10.1642766161680207 | 11.0583966612348394 | O121 |
| 3.6249116405096977  | 2.5062994086356163  | 16.0447040064369304 | O122 |
| -3.3058291589718767 | 10.5338554605982093 | 11.0596364047291775 | O123 |
| 10.4276015547129770 | 2.0310720687068784  | 16.0439750705746782 | O124 |
| -0.2624977314131378 | 4.5192566065494448  | 11.0609395031635973 | O125 |
| 7.4161170052219543  | 8.1181020513823743  | 16.0530503330085139 | O126 |
| 2.3454105486167984  | 0.0829664529968046  | 11.7054985788635975 | O127 |
| 12.0666293999668959 | 0.0517375724241992  | 15.3314031067606642 | O128 |
| 13.1817482934124968 | 2.1481432860937071  | 11.7428874912070711 | O129 |
| -6.0800661606092357 | 10.5207926542839658 | 15.3489861469493913 | O130 |
| 5.9766059378979399  | 10.4421626713482070 | 11.7038619272445459 | O131 |
| 1.1010348906245431  | 2.0709749698029305  | 15.3036468810909980 | O132 |
| 11.6175775218803494 | 0.0479653925248291  | 11.6086642198499099 | O133 |
| 2.7869053637395726  | 0.0625199164825416  | 15.5217118952041062 | O134 |
| -5.8551235010891549 | 10.1454394558321326 | 11.6185354373920120 | O135 |
| 12.9543781401370666 | 2.5266427995493710  | 15.4949243832427914 | O136 |
| 1.3512435977291091  | 2.5132179004652198  | 11.6354654042778112 | O137 |
| 5.7603509693442643  | 10.0932970884696989 | 15.5126228030379707 | O138 |
| 3.0994320281976449  | 1.8532867355571421  | 13.5573705524949677 | O139 |
| 4.0654742342879642  | 10.7293759178017911 | 13.5380726448281141 | O140 |
| 11.2395354747001477 | 1.8528048637348777  | 13.5535606630597485 | O141 |
| -4.1227364151447832 | 10.7924684298270535 | 13.5410785531063205 | O142 |
| 7.1792535733806844  | 8.9378644001575136  | 13.5633101607041464 | O143 |
| -0.0721028253186433 | 3.7142614769826023  | 13.5533422289262777 | O144 |
| -0.0643659767432991 | 8.2738122557324836  | 26.1616694157778227 | O145 |
| 7.2393979070334202  | 3.9572248672784429  | 26.2120215791936033 | O146 |
| 5.0378961984826338  | 2.9662536730532989  | 4.4148275352483743  | Si1  |
| 2.0449469495411146  | 9.6768572865560287  | 22.6680722891577950 | Si2  |
| 9.3454627918786990  | 3.0221166082064550  | 4.4092738537966589  | Si3  |
| -2.1876327674205815 | 9.6348368790833554  | 22.6626295606751746 | Si4  |
| 7.1442198304537907  | 6.7197323217335923  | 4.4185424856502413  | Si5  |
| -0.0184564493521715 | 5.8889777447136513  | 22.6654845784806547 | Si6  |
| 2.0756379186516689  | 9.6777292531304138  | 4.4420027735511116  | Si7  |
| 5.0491507655192205  | 2.9435764377528657  | 22.6653487264824811 | Si8  |
| -2.2037754772699309 | 9.6005860756249994  | 4.4253105366376140  | Si9  |
| 9.3136737057713912  | 3.0363074781151020  | 22.6687126470408167 | Si10 |
| 0.0024331939455671  | 5.9313432385716354  | 4.4339506071250394  | Si11 |
| 4.6021120568922607  | 2.5535491695757231  | 9.6876292608932069  | Si12 |
| 2.5855719491336968  | 10.0247643556713300 | 17.3945720636246541 | Si13 |
| 9.9090486832438440  | 2.8398819446297519  | 9.6892845271824282  | Si14 |
| -2.7424389291263758 | 9.8754035757898588  | 17.3905833291529355 | Si15 |
| 7.0106041202218199  | 7.2867561505676886  | 9.6954695016712336  | Si16 |
| 0.0527221090822918  | 5.3222298552914520  | 17.4134376736551957 | Si17 |

---

|                     |                     |                     |      |
|---------------------|---------------------|---------------------|------|
| 2.5696280644388709  | 9.9776154569064399  | 9.6892857432939170  | Si18 |
| 4.4930933530356763  | 2.7681890414469756  | 17.3874697540458456 | Si19 |
| -2.7270373387950158 | 9.8819248932762207  | 9.6948458909460555  | Si20 |
| 9.8002296972619156  | 2.6666045786489425  | 17.3969531950087877 | Si21 |
| 0.0073457944750923  | 5.3421407343894787  | 9.6923208701679062  | Si22 |
| 7.2319618583181180  | 7.3031033004480426  | 17.4458196616768539 | Si23 |
| 2.6716133014319565  | 1.6482083895793347  | 12.0014683687495118 | Si24 |
| 4.4740005033629204  | 10.9866555887007564 | 15.0910436619855890 | Si25 |
| 11.6672479308558774 | 1.6194259397939785  | 12.0016217312422047 | Si26 |
| -4.5458529768618110 | 11.0005908006501958 | 15.0974518247612739 | Si27 |
| 7.1902922970031931  | 9.4050924536484892  | 12.0052698407552043 | Si28 |
| -0.0565595172264881 | 3.1949107341457732  | 15.0964274042258086 | Si29 |
| 4.4667799997358246  | 10.9725519962759694 | 11.9813839849232320 | Si30 |
| 2.6527259606063236  | 1.6248155826568251  | 15.1050877683388389 | Si31 |
| -4.5404364814812128 | 11.0161228914248763 | 11.9856850034171920 | Si32 |
| 11.6720156936831181 | 1.6142099460296127  | 15.1036759574015669 | Si33 |
| -0.0591819245779339 | 3.2208009404815341  | 12.0022845854531202 | Si34 |
| 7.1809510562216454  | 9.4159396078400253  | 15.1181675191955271 | Si35 |
| 5.7076510285405586  | 0.0373551965117320  | 4.9937867231840398  | Si36 |
| 8.5363538360373408  | 0.1201107847809727  | 22.0581760074374351 | Si37 |
| -2.8956440335871356 | 5.0679846869524834  | 4.9997255910685618  | Si38 |
| -4.3469584913895760 | 7.5268526799652165  | 22.1003849070438783 | Si39 |
| 4.2732623945157115  | 7.6000411398671854  | 5.0072150121722334  | Si40 |
| 2.8977715589021962  | 5.1293666244496965  | 22.0795706330741446 | Si41 |
| 8.8498584575246824  | 0.0995993591642398  | 5.0706923576895342  | Si42 |
| 5.4078736782227503  | 0.0850452360326258  | 22.0262896599117113 | Si43 |
| 9.9192794124764081  | 7.7579325124125846  | 5.0761134404326373  | Si44 |
| -2.7580535094032430 | 4.8254631735960594  | 22.0493497466929220 | Si45 |
| 2.7492628133952062  | 4.8512143098050045  | 5.0811245782787680  | Si46 |
| 4.3955143321579246  | 7.8905634243941156  | 22.0742203208281538 | Si47 |
| -1.5600421608261410 | 12.4631715583955440 | 8.2150310905844979  | Si48 |
| 8.5415702063875969  | 0.1016518023522645  | 18.8365794583305011 | Si49 |
| -2.8161452193908620 | 5.0588671011301107  | 8.2221151315089642  | Si50 |
| -4.3331351499699373 | 7.5200094624705009  | 18.8711393063389359 | Si51 |
| 4.2357598474577065  | 7.6745638228480049  | 8.2285742009917282  | Si52 |
| 2.9127733757034910  | 5.1465270665031202  | 18.8587802379707519 | Si53 |
| 8.7950647640505490  | 0.1535153915771997  | 8.2967297852648905  | Si54 |
| 5.4113757422190654  | 0.0748821430222952  | 18.7992029580838036 | Si55 |
| 9.8895130368913389  | 7.6812985661135542  | 8.3034245400947846  | Si56 |
| -2.7555253357681044 | 4.8117824870915467  | 18.8225503020235720 | Si57 |
| 2.8246388080690150  | 4.8631719869723051  | 8.3064596963018484  | Si58 |
| 4.4453890315927618  | 7.8900768402315373  | 18.8473674944089247 | Si59 |
| 7.1688069242238406  | 4.2351501196839987  | 2.5454433557154190  | Si60 |
| -0.0612488114199872 | 8.3612411305266470  | 24.5362265284294843 | Si61 |

---

|                     |                     |                     |      |
|---------------------|---------------------|---------------------|------|
| -0.0372782842039445 | 8.3899785889873630  | 2.5667161881825904  | Si62 |
| 7.1481644082389311  | 4.1305453690190568  | 24.5848831564877059 | Si63 |
| 7.1782301188134037  | 4.2323614212847565  | 6.2821945183432915  | Si64 |
| -0.0464599488876223 | 8.3816677940177335  | 20.7905288200120637 | Si65 |
| -0.0450247691480570 | 8.4078233979742301  | 6.3156088029624202  | Si66 |
| 7.1357813245079456  | 4.2048721025477631  | 20.7731674838001616 | Si67 |
| 7.1760593036671576  | 4.2231552772863683  | 9.5110158824827113  | Si68 |
| -0.0383188690363481 | 8.3909274239758211  | 17.5568452939969397 | Si69 |
| -0.0525731214624976 | 8.4019075112602053  | 9.5482175176872506  | Si70 |
| 7.1703106726620014  | 4.2007634008460704  | 17.5472201299318833 | Si71 |
| 7.1121776056664903  | 6.6453281439122014  | 22.6955740369932712 | All  |
| 7.7802815209777272  | 4.6324991506024142  | 0.4122998091545940  | H1   |
| -0.0526773876726816 | 9.1302656776848519  | 0.4372168735047252  | H2   |
| -0.1487139812441836 | 9.1010547272645397  | 26.6596749674260494 | H3   |
| 6.5511968548515078  | 4.3996024250917714  | 26.7312231061387813 | H4   |
| 6.5275769883239230  | 8.9753927959365569  | 24.1771481017646686 | H5   |
| 5.6352577665371291  | 10.7377736381978508 | 22.9388434181982745 | H6   |
| 6.3041649207766026  | 10.3530523171595323 | 25.2611088579950511 | H7   |
| 8.0216085919930205  | 9.8608671583815948  | 24.7197057268423990 | H8   |
| 7.8331762093500528  | 11.7425835472438429 | 22.0788147638455250 | H9   |
| 7.2341115533952696  | 10.4077624821660049 | 21.1015426398167847 | H10  |
| 8.6126261896994905  | 10.1479403650924791 | 22.2881664359585869 | H11  |
| 7.6515651191211900  | 10.6389047987970748 | 22.0920377622293529 | C1   |
| 6.6832546855997759  | 10.4857239072089392 | 23.1560766594841105 | C2   |
| 6.9686458343091218  | 10.0065839554978737 | 24.4602906817867343 | C3   |
| Isopropoxy          |                     |                     |      |
| 7.0907065010292758  | 4.1604484960747001  | 0.9236838464675146  | O1   |
| -0.0106717995273593 | 8.2921216281036241  | 0.9424715177602641  | O2   |
| 5.8281885580576862  | 3.4751900495697412  | 3.0942121850086153  | O3   |
| 1.1961169781312577  | 9.1474608996165312  | 23.8998468606318930 | O4   |
| 8.5067599521056696  | 3.4378900225437254  | 3.0933814573607998  | O5   |
| -1.4472542700487736 | 9.1899165522779303  | 24.0094230647798028 | O6   |
| 7.2183082368378777  | 5.7668281801178214  | 3.0790660788572048  | O7   |
| -0.1430079317656903 | 6.8329864481587252  | 24.0173416220102496 | O8   |
| 1.1675910304962924  | 9.3472597093693768  | 3.1257677541883071  | O9   |
| 5.9267679789282361  | 3.1423919856097529  | 23.9900358140909802 | O10  |
| -1.4637929938790015 | 8.9691620681166366  | 3.1072928276616585  | O11  |
| 8.5489415044815615  | 3.6073124698327979  | 24.0280266754070446 | O12  |
| 0.1810602340906264  | 6.8570714082260062  | 3.1076540117526057  | O13  |
| 6.7938207135390005  | 5.6554046119317576  | 24.1852292767111869 | O14  |
| 4.9545717478407738  | 1.3194406290753873  | 4.3952119738304658  | O15  |
| 2.0566520852402022  | 11.3435031486601705 | 22.6403719907674237 | O16  |
| 10.8089327689966783 | 3.7334983485785957  | 4.4030276920196361  | O17  |
| -3.7088951473536196 | 8.8795591374154395  | 22.6433508665910423 | O18  |

---

|                     |                     |                     |     |
|---------------------|---------------------|---------------------|-----|
| 5.7720073140541794  | 7.5876183362194771  | 4.3913885268354322  | O19 |
| 1.4552612181078657  | 5.1472819205594211  | 22.7308915759145869 | O20 |
| 2.3917502612798209  | 11.2620233345098253 | 4.5078123109925121  | O21 |
| 4.5877063102862419  | 1.3352165772170488  | 22.5763381121330085 | O22 |
| -3.7394518916906039 | 9.0422475399461213  | 4.4897628528554296  | O23 |
| 10.8492555433229896 | 3.6065298426140013  | 22.6787198424559051 | O24 |
| 1.2338200320008705  | 4.8407457388628359  | 4.4927021175443000  | O25 |
| 5.8811493928698164  | 8.0486888601664806  | 22.7755272308475440 | O26 |
| -1.1667400773914414 | 4.7814988776660305  | 22.6221002450649458 | O27 |
| 8.4088109293257016  | 7.7182158262098408  | 4.4468117783715986  | O28 |
| -2.5010289694650565 | 11.2112293630427775 | 22.6422498782204755 | O29 |
| 9.5728633976012283  | 1.4018429877385314  | 4.4463474265584155  | O30 |
| 3.4969997657149454  | 9.1462900593178169  | 22.6075312367694927 | O31 |
| 3.5378283658713259  | 3.5452454525129609  | 4.4541080095956680  | O32 |
| 8.6592158133837387  | 7.2948450744927671  | 22.7266913983034549 | O33 |
| -1.3955425983602454 | 5.1130446330870223  | 4.3505925584719831  | O34 |
| 9.2725835100642691  | 1.4842956936995182  | 22.5950995983775158 | O35 |
| -2.2125630429055096 | 11.1968048089904411 | 4.3579466968801350  | O36 |
| 3.7153847725763329  | 3.8261048699703797  | 22.6725211071687838 | O37 |
| 3.4747979068325163  | 8.8528216572696721  | 4.3676632244052627  | O38 |
| 5.8580139489548770  | 3.4191029393334111  | 5.7644620868558922  | O39 |
| 1.2490625199540686  | 9.2005437942390493  | 21.2175628237802343 | O40 |
| 8.5338155948430288  | 3.4709946192577461  | 5.7664218299293379  | O41 |
| -1.4074090320540975 | 9.1674920473676664  | 21.3272849179536230 | O42 |
| 7.1501331200963021  | 5.7615848721423690  | 5.7518412324394239  | O43 |
| -0.0472776376234934 | 6.8566258279674148  | 21.3506803221180057 | O44 |
| 1.2500663611175327  | 9.2378995841169598  | 5.7991747849593578  | O45 |
| 5.9403950901790656  | 3.1866128843275874  | 21.2914558277804886 | O46 |
| -1.4192628139708230 | 9.0744634278027458  | 5.7809604572402753  | O47 |
| 8.5467170030427333  | 3.7601470965765378  | 21.3520378855783299 | O48 |
| 0.0585641208757619  | 6.8454092989853024  | 5.7786177658218314  | O49 |
| 6.7085032724860056  | 5.7397972269112376  | 21.3023021674632318 | O50 |
| 7.1828012133476227  | 4.2336768802804388  | 7.8860832325192254  | O51 |
| -0.1517751765568596 | 8.3147258488070772  | 19.1703987012419610 | O52 |
| -0.0545857840260222 | 8.3740534993690261  | 7.9198242332611573  | O53 |
| 7.1436359640504214  | 4.1937489054675376  | 19.1712089841496223 | O54 |
| 5.5701526070937506  | -0.0169443010335601 | 6.6131412732317418  | O55 |
| 8.6033806767361547  | 0.1157295774593016  | 20.4185338745288547 | O56 |
| -2.7822241610496561 | 4.9688287709650520  | 6.6090673232187633  | O57 |
| -4.4255593280415697 | 7.5748218016104518  | 20.4515781505015362 | O58 |
| 4.3192228377249693  | 7.7246606881370292  | 6.6203304338974567  | O59 |
| 2.8536656103288127  | 5.0721935072998043  | 20.4749879095163436 | O60 |
| 8.9472531463177667  | 0.1262091017330344  | 6.6915563325275071  | O61 |
| 5.3186356104457042  | -0.0216920481616417 | 20.3929748504336636 | O62 |

---

---

|                     |                     |                     |      |
|---------------------|---------------------|---------------------|------|
| 9.8410131150979616  | 7.8056340222864886  | 6.6830846529519281  | O63  |
| -2.6594772710875896 | 4.6386214124392753  | 20.4287711968762480 | O64  |
| 2.7209625607440420  | 4.7188170458490761  | 6.6914209422208444  | O65  |
| 4.5399458678212987  | 8.0186243546423110  | 20.4449019777339274 | O66  |
| 7.2871544774351795  | 0.0535972797700642  | 4.6032317692198825  | O67  |
| 6.9603378072481608  | 0.1302610186178484  | 22.4905253575119772 | O68  |
| 10.7022164559037130 | 6.3855260278813777  | 4.5916234953520911  | O69  |
| -3.3141676409351963 | 6.2649784455784863  | 22.4536356280354568 | O70  |
| 3.5151680709719146  | 6.1974456987763631  | 4.6161201176117270  | O71  |
| 3.7541958847261805  | 6.4832409982250878  | 22.5157439003035691 | O72  |
| 7.2182720601260186  | 0.0544694311045460  | 8.7069208345478586  | O73  |
| 6.9751718829337692  | 0.0502229999302875  | 18.3131592277458282 | O74  |
| -3.6870509215321454 | 6.3434648414663499  | 8.7069678491599110  | O75  |
| -3.4823832645268129 | 6.1574464543719838  | 18.3947257275710143 | O76  |
| 3.5332106700305368  | 6.2545269641525314  | 8.7023038954428049  | O77  |
| 3.7009830232670309  | 6.5123870627831533  | 18.4098451917903567 | O78  |
| 4.8007046106286708  | 1.1946619041587445  | 8.8045680149805179  | O79  |
| 2.1070186676533300  | 11.2934242865697065 | 18.2821798816030494 | O80  |
| 10.9621403727729998 | 3.6774416822091269  | 8.7785797235207035  | O81  |
| -3.5886658079472999 | 8.8126092960977704  | 18.3060408271518611 | O82  |
| 5.7320977710273171  | 7.7731809399073430  | 8.8235595831358822  | O83  |
| 1.4117526851983264  | 5.1583408657022431  | 18.2960979799350092 | O84  |
| 2.3974649942251647  | 11.3812401571569914 | 8.9224810472232683  | O85  |
| 4.6465690173694565  | 1.3699797481601235  | 18.2467638919317814 | O86  |
| -3.8792955565163529 | 9.0059544414166002  | 8.9236246753387611  | O87  |
| 10.9278113595958999 | 3.4892999495087089  | 18.2146208767664390 | O88  |
| 1.3251143248686645  | 4.7596664693195798  | 8.9295953585252779  | O89  |
| 5.9946237018073569  | 7.9004524531967686  | 18.2611319659975422 | O90  |
| -1.2034501786857066 | 4.7762877042184568  | 18.2453506544987896 | O91  |
| 8.3651564127900038  | 7.5339466010594238  | 8.8455834393896957  | O92  |
| -2.5630835480842173 | 11.2377462368420264 | 18.1786747159576656 | O93  |
| 9.4440627118087654  | 1.5139260149517675  | 8.8685720553656999  | O94  |
| 3.6895187215321030  | 9.1839171173238476  | 18.2586588483482508 | O95  |
| 3.6976189133773794  | 3.5993497109401154  | 8.8608817884559699  | O96  |
| 8.5962062052467729  | 7.3940070114234198  | 18.2693140976729005 | O97  |
| -1.2851791223538134 | 5.1887414944927199  | 8.7365996759223936  | O98  |
| 9.2429913700590856  | 1.4530739601639340  | 18.2724281512031688 | O99  |
| -2.1965465893857861 | 11.0463701710236624 | 8.7244661339414620  | O100 |
| 3.7310097265409343  | 3.8482319711716308  | 18.3324877984301864 | O101 |
| 3.3338744731961247  | 8.9097263041418362  | 8.7352729802039324  | O102 |
| 6.0555346581351142  | 3.1857510136249436  | 10.0439681262767202 | O103 |
| 1.3171730929743983  | 9.0456930939268787  | 17.0727213406345157 | O104 |
| 8.6323057488641464  | 3.7579899464844755  | 10.0592159914522981 | O105 |
| -1.3129099765141472 | 9.2236653893702201  | 16.9659405960091796 | O106 |

---

|                     |                     |                     |      |
|---------------------|---------------------|---------------------|------|
| 6.8500419622373743  | 5.7043780913552622  | 10.0660817555740625 | O107 |
| -0.1428781700001265 | 6.8543722188678631  | 16.9559827781587167 | O108 |
| 1.0904715663102476  | 9.3886796638403816  | 10.0925897153152171 | O109 |
| 5.9535345920567373  | 3.3036071506245994  | 16.9663240678290350 | O110 |
| -1.5006416240972853 | 8.8709124927932894  | 10.0937177760411476 | O111 |
| 8.5723533254624638  | 3.6892699825034345  | 16.9864691133746071 | O112 |
| 0.2463742694172453  | 6.8862240183175940  | 10.1002738843556763 | O113 |
| 6.9265100597046905  | 5.7524325461839760  | 17.0075208070099535 | O114 |
| 3.9199793712941009  | 2.1603211315316577  | 11.1020173674315981 | O115 |
| 3.1849699954261377  | 10.5136333313039660 | 15.9984929510918104 | O116 |
| 10.6223787262088685 | 2.4362548550816086  | 11.0855427773756485 | O117 |
| -3.5723883508624903 | 10.0859324725544077 | 15.9957470592842164 | O118 |
| 7.0355724774713586  | 8.0788294621095265  | 11.1012725116306594 | O119 |
| 0.2530157756535054  | 4.4406723772160248  | 16.0365403993363671 | O120 |
| 3.3895511456810334  | 10.1547267786957072 | 11.0737148282189306 | O121 |
| 3.6189625036741759  | 2.5087084695072304  | 16.0609573971474795 | O122 |
| -3.3134414035318733 | 10.4990260326344789 | 11.0593740570006656 | O123 |
| 10.4043370335870975 | 2.0995981525182876  | 15.9961684230498768 | O124 |
| -0.2425455894797746 | 4.5056696109009744  | 11.0718599106587021 | O125 |
| 7.4282930741973772  | 8.1414914232887270  | 16.0271696095434244 | O126 |
| 2.3683318407649208  | 0.0754673834948125  | 11.7038035436674797 | O127 |
| 12.0010841378430015 | 0.0526737065384034  | 15.3709125709336494 | O128 |
| 13.2011179716302038 | 2.1188776341163962  | 11.7007479438386461 | O129 |
| -6.1052728798624916 | 10.5594233354213713 | 15.3237480088583133 | O130 |
| 5.9574264845714184  | 10.4492760831225677 | 11.6885693803954727 | O131 |
| 1.1076583057608687  | 2.0325419959777609  | 15.2911176240072919 | O132 |
| 11.5917992472256319 | 0.0455819860105033  | 11.5940121901730091 | O133 |
| 2.8245861798773002  | 0.0497863858406184  | 15.5266995620329329 | O134 |
| -5.8701802804960552 | 10.1554591453348806 | 11.6131402174727860 | O135 |
| 12.9648624290454730 | 2.5008554070676889  | 15.5263276067762597 | O136 |
| 1.3708787075377167  | 2.5015733817253478  | 11.6482970371531813 | O137 |
| 5.7434293022641629  | 10.1044800331034299 | 15.5185277102967820 | O138 |
| 3.1245538215104882  | 1.8413209216650912  | 13.5656906941818534 | O139 |
| 4.0569939573859370  | 10.7429480798167809 | 13.5418825187824261 | O140 |
| 11.2862765475985842 | 1.8533059441734916  | 13.5431735568673837 | O141 |
| -4.1259209475652403 | 10.7780796683938807 | 13.5378859698778911 | O142 |
| 7.1522268088611911  | 8.9578279771936362  | 13.5529190033925655 | O143 |
| -0.0944064589863447 | 3.6693423934729390  | 13.5543152963077400 | O144 |
| -0.0501708561667549 | 8.3405847396441803  | 26.1425261916139071 | O145 |
| 7.1893046636356797  | 3.9144128712305033  | 26.2289665115276414 | O146 |
| 5.0463064746565642  | 2.9412692442698352  | 4.4188327411923130  | Si1  |
| 1.9689245037840726  | 9.7243005161908851  | 22.5938785827703867 | Si2  |
| 9.3527804866598334  | 3.0130280790045725  | 4.4194331808217946  | Si3  |
| -2.2643001407141798 | 9.6052835610685037  | 22.6582017892806249 | Si4  |

---

|                     |                     |                     |      |
|---------------------|---------------------|---------------------|------|
| 7.1356991925511686  | 6.7054749014378485  | 4.4091598668688299  | Si5  |
| 0.0156477842427503  | 5.9022263010666416  | 22.6866832586717422 | Si6  |
| 2.0728322849363359  | 9.6680415905407191  | 4.4439113858810284  | Si7  |
| 5.0551906502506920  | 2.8994497391076184  | 22.6432782733728573 | Si8  |
| -2.2036298265795122 | 9.5741874607992088  | 4.4282468164909599  | Si9  |
| 9.2892049208842860  | 3.1169603842233609  | 22.6683474198244106 | Si10 |
| 0.0144475893681331  | 5.9148301065285516  | 4.4259960979246458  | Si11 |
| 4.6068714647077469  | 2.5427296194450477  | 9.6892512313280577  | Si12 |
| 2.5748338747621791  | 10.0104019110557214 | 17.4117628493495253 | Si13 |
| 9.9143762874087571  | 2.8322665935400995  | 9.6866061282143221  | Si14 |
| -2.7589650991280936 | 9.8438344451008177  | 17.3744859483602205 | Si15 |
| 7.0077897641763363  | 7.2787551249432001  | 9.6970202476679717  | Si16 |
| 0.0715079813928430  | 5.3036309519031315  | 17.3941784689696561 | Si17 |
| 2.5594046625382463  | 9.9625085242487899  | 9.6962484548419674  | Si18 |
| 4.4893976548576084  | 2.7508222071944504  | 17.4074457662661253 | Si19 |
| -2.7294279959766405 | 9.8581584858883957  | 9.6917602087735339  | Si20 |
| 9.7914303899208708  | 2.6879992682918807  | 17.3774465378959668 | Si21 |
| 0.0123494460197260  | 5.3272652828218723  | 9.6997246541114901  | Si22 |
| 7.2380740248842352  | 7.2981725828505404  | 17.3984034945007124 | Si23 |
| 2.6930489852224095  | 1.6384921666510748  | 12.0100207856780958 | Si24 |
| 4.4452756305006309  | 10.9845543969316299 | 15.1020741127127494 | Si25 |
| 11.6814781095721631 | 1.6152268181695619  | 11.9851065969432664 | Si26 |
| -4.5540212850471367 | 10.9941460433287865 | 15.0919736802841644 | Si27 |
| 7.1730810868351433  | 9.4160552794535430  | 11.9934765804855683 | Si28 |
| -0.0495595276753733 | 3.1602673457359236  | 15.0997937275064533 | Si29 |
| 4.4480251245671649  | 10.9738366168633519 | 11.9804145604335908 | Si30 |
| 2.6686438362078322  | 1.6106215114800315  | 15.1105403252814483 | Si31 |
| -4.5411362666817183 | 11.0038878036773422 | 11.9821096547252228 | Si32 |
| 11.6658039909116091 | 1.6228190960736812  | 15.1064656946701401 | Si33 |
| -0.0497796731938038 | 3.1949094900782478  | 11.9981483432329075 | Si34 |
| 7.1656618030359676  | 9.4422031744353170  | 15.1044498725318004 | Si35 |
| 5.7072015020072513  | 0.0130336338843939  | 5.0040909987920710  | Si36 |
| 8.5223405254346680  | 0.1635933256685278  | 22.0293152669056340 | Si37 |
| -2.8837879766943799 | 5.0535465659708079  | 4.9996631411522765  | Si38 |
| -4.3370461773770499 | 7.4798357811450851  | 22.0695139830786395 | Si39 |
| 4.2677637907029347  | 7.5875665971167461  | 5.0107806660660188  | Si40 |
| 2.9449492347874369  | 5.1169533515672114  | 22.0851485711090447 | Si41 |
| 8.8487226642994745  | 0.0867905279852478  | 5.0769452204481276  | Si42 |
| 5.4005214465380149  | 0.0436656216185245  | 22.0079162280889555 | Si43 |
| 9.9144907434305409  | 7.7336551292111428  | 5.0677683450848940  | Si44 |
| -2.6990112336197516 | 4.8174378532205644  | 22.0395417680801202 | Si45 |
| 2.7551311421555846  | 4.8296400815724629  | 5.0768952731698542  | Si46 |
| 4.3575670919353602  | 7.8994845010672101  | 22.0334188185903344 | Si47 |
| -1.5557365220378765 | 12.4480652174335447 | 8.2255177937108339  | Si48 |

---



|                                         |                     |                     |      |
|-----------------------------------------|---------------------|---------------------|------|
| 8.5305052393519034                      | 0.1050638819607582  | 18.8066766118607589 | Si49 |
| -2.8144032852940808                     | 5.0507568167724539  | 8.2215989709507600  | Si50 |
| -4.3286348670524202                     | 7.4781423470330051  | 18.8491216918482110 | Si51 |
| 4.2278736966110717                      | 7.6558274690743779  | 8.2322403130063488  | Si52 |
| 2.9259060674972579                      | 5.1456770488043784  | 18.8615212039011269 | Si53 |
| 8.7986545113120211                      | 0.1403875732926302  | 8.3029954689211607  | Si54 |
| 5.4082953590121159                      | 0.0401370213369184  | 18.7801316703274601 | Si55 |
| 9.8831699018071468                      | 7.6681135501859554  | 8.2952783717222349  | Si56 |
| -2.7228690680157306                     | 4.7759285326449055  | 18.8195248904405652 | Si57 |
| 2.8198636110712210                      | 4.8411984630187188  | 8.3018761296373142  | Si58 |
| 4.4765341757449439                      | 7.8846759724328210  | 18.8225204083031947 | Si59 |
| 7.1725238694361675                      | 4.2172059303109739  | 2.5456578277020396  | Si60 |
| -0.1192186614238944                     | 8.3839530897103547  | 24.5189873271651351 | Si61 |
| -0.0323684860247431                     | 8.3802001827573669  | 2.5651650564532571  | Si62 |
| 7.0997863269044927                      | 4.1265816132992761  | 24.6104049557521307 | Si63 |
| 7.1807296621769687                      | 4.2205652368743074  | 6.2827733701974484  | Si64 |
| -0.0970491357476844                     | 8.3790422306967614  | 20.7725765522170747 | Si65 |
| -0.0410636375712690                     | 8.3829115666877634  | 6.3147020555204314  | Si66 |
| 7.0807941914099688                      | 4.2586100800114126  | 20.7877263627072786 | Si67 |
| 7.1804752123853053                      | 4.2197903460645936  | 9.5112220477219473  | Si68 |
| -0.0707058017817124                     | 8.3623117770752113  | 17.5451806233474770 | Si69 |
| -0.0549536324016238                     | 8.3800746197926763  | 9.5473634067876656  | Si70 |
| 7.1507969683545891                      | 4.2368259118595333  | 17.5496635343500174 | Si71 |
| 7.0978557675235407                      | 6.5947569288199510  | 22.7682653682263592 | All  |
| 7.7785578672168363                      | 4.6086354451769322  | 0.4086404389416715  | H1   |
| -0.0522533948695312                     | 9.1149317208388823  | 0.4319597037608456  | H2   |
| -0.2112531448285946                     | 9.1644251773643273  | 26.6272633015825839 | H3   |
| 6.5336888723892939                      | 4.3815052139735204  | 26.7684880586017151 | H4   |
| 6.5189732920548273                      | 8.6766722524196975  | 25.2969328999283469 | H5   |
| 5.3579404165917390                      | 9.9307326010440882  | 23.4903473222386623 | H6   |
| 7.2440625728986188                      | 10.2732586917669177 | 24.9995712030088555 | H7   |
| 8.0716617114420544                      | 8.8153197741174765  | 24.4089312627903468 | H8   |
| 7.2815422224583779                      | 11.1749480751180510 | 22.4996403039102724 | H9   |
| 6.4097416327906913                      | 10.2377768407814624 | 21.2657662163854013 | H10  |
| 7.9771548098389582                      | 9.6504360083232807  | 21.9017089744683595 | H11  |
| 7.0400189747355961                      | 10.1560238245366570 | 22.1626533174769236 | C1   |
| 6.3147037083887039                      | 9.4393356509334208  | 23.2804319647142712 | C2   |
| 7.0877337644589247                      | 9.2723694153579572  | 24.5698224813383383 | C3   |
| Co-adsorption of isopropoxy and benzene |                     |                     |      |
| 6.9935099488725996                      | 4.1390718054782925  | 1.0645861952708979  | O1   |
| -0.0776203555823747                     | 8.2410398003532066  | 1.0868608958585908  | O2   |
| 5.7618551163842184                      | 3.3975026580445302  | 3.2323707283205243  | O3   |
| 1.1787750101275920                      | 9.0831891971985534  | 24.0744707180858661 | O4   |
| 8.4437370067398323                      | 3.3794178168037790  | 3.1984193331504458  | O5   |

---

|                     |                     |                     |     |
|---------------------|---------------------|---------------------|-----|
| -1.4617061555511124 | 9.1838911706823474  | 24.0969200080481478 | O6  |
| 7.1387789444261820  | 5.6969374475598800  | 3.2561819599881230  | O7  |
| -0.2298146282709070 | 6.7982558191574158  | 24.0608813905283903 | O8  |
| 1.0857814000985933  | 9.2997904213210330  | 3.2737371837890317  | O9  |
| 5.8773636331986481  | 3.1010913084364971  | 24.1195533249271428 | O10 |
| -1.5448097876387950 | 8.9180116756702716  | 3.2409916681744493  | O11 |
| 8.4792381735717886  | 3.6240894262069081  | 24.0601954084253897 | O12 |
| 0.1047594134760357  | 6.8089967364044055  | 3.2561769302220194  | O13 |
| 6.6605824725368450  | 5.6447505961782483  | 24.1519828426442942 | O14 |
| 4.8556510716777437  | 1.2651811479722848  | 4.5502838298392660  | O15 |
| 1.9948170304388393  | 11.2850121369527727 | 22.7856640850479408 | O16 |
| 10.7351386286335533 | 3.6874629045438749  | 4.5301565048490211  | O17 |
| -3.7181965665821952 | 8.8048186437754552  | 22.7361211218060077 | O18 |
| 5.6957094548469209  | 7.5445085565753605  | 4.5315699666149376  | O19 |
| 1.4267048075596724  | 5.1641413085540098  | 22.8077114445864240 | O20 |
| 2.3027532397930406  | 11.2210077383583080 | 4.6484560884572748  | O21 |
| 4.5368542960845657  | 1.3076622632943693  | 22.6934406456557554 | O22 |
| -3.8212607871152215 | 8.9937490055590050  | 4.6234426922923300  | O23 |
| 10.8136415443485312 | 3.5157146308061651  | 22.7580396494654167 | O24 |
| 1.1593299064058433  | 4.7918422252707407  | 4.6404756138875491  | O25 |
| 5.8976558216728083  | 8.0770193744063743  | 22.5844419029154686 | O26 |
| -1.1905628912585082 | 4.7049144569095764  | 22.6731226359363411 | O27 |
| 8.3301372339547211  | 7.6584166715362709  | 4.6070210987526075  | O28 |
| -2.5787622977130300 | 11.1721682677027818 | 22.7424624975684821 | O29 |
| 9.4957257260978682  | 1.3583077563135972  | 4.5827183331268380  | O30 |
| 3.4687563639269481  | 9.0916593877386251  | 22.7602675855221683 | O31 |
| 3.4633747121494167  | 3.5060357971754517  | 4.5770888211828469  | O32 |
| 8.6389758861616777  | 7.2511745511673897  | 22.8890915746385701 | O33 |
| -1.4677997005132093 | 5.0612389075642845  | 4.4994821682610411  | O34 |
| 9.2065436517852088  | 1.4210990257596265  | 22.7227722960741403 | O35 |
| -2.2867133560653166 | 11.1453644301734354 | 4.4929501840707973  | O36 |
| 3.6575673753827882  | 3.7888495358887821  | 22.7982797788066236 | O37 |
| 3.3988114746153748  | 8.8161910432922337  | 4.5117892580450745  | O38 |
| 5.7725755708437481  | 3.3677986533109117  | 5.9026549499099712  | O39 |
| 1.2174227484757871  | 9.1207595113107818  | 21.3921908443411333 | O40 |
| 8.4493685194585186  | 3.4440075271925008  | 5.8705712318659957  | O41 |
| -1.4370208387056080 | 9.1583237098497463  | 21.4133012622110144 | O42 |
| 7.0462298007609050  | 5.7221550569902968  | 5.9280195929876749  | O43 |
| -0.1363523320986295 | 6.8065124523023597  | 21.3951832080249531 | O44 |
| 1.1712183295874548  | 9.1931096029015595  | 5.9432904633742698  | O45 |
| 5.8918575140563938  | 3.1833524513284250  | 21.4269047677005737 | O46 |
| -1.4995374425152455 | 9.0210537213299542  | 5.9149552622659538  | O47 |
| 8.5235411535501235  | 3.6536670596042096  | 21.3921616852111001 | O48 |
| -0.0145379423511613 | 6.7962743979862212  | 5.9265473790656511  | O49 |

---

|                     |                     |                     |     |
|---------------------|---------------------|---------------------|-----|
| 6.7733550620135272  | 5.7098915594973381  | 21.2854016533888526 | O50 |
| 7.1208919578129208  | 4.1303113073095012  | 8.0215346835881824  | O51 |
| -0.1247876264223091 | 8.3565351607084768  | 19.2679279495959754 | O52 |
| -0.1400073303251350 | 8.3339292200028137  | 8.0585904015893615  | O53 |
| 7.0717169016957708  | 4.0277804288379730  | 19.2428961404183205 | O54 |
| -1.7340790825886554 | 12.4128675888064635 | 6.7586569233132510  | O55 |
| 8.5799604238395837  | 0.0314579877389550  | 20.5406953898400850 | O56 |
| 11.5602631148037283 | 4.9149155698848697  | 6.7485859244039563  | O57 |
| -4.4643721607384466 | 7.4304510948792126  | 20.5895454297128175 | O58 |
| 4.2491897655193256  | 7.6770659514119348  | 6.7582631283637520  | O59 |
| 2.8463222023893118  | 5.0230942082663912  | 20.5762226075423449 | O60 |
| 8.8658682530103459  | 0.0949430976654254  | 6.8310351909726901  | O61 |
| 5.2049994060812512  | -0.0431263944965124 | 20.5023636812216701 | O62 |
| 9.7843311650708191  | 7.7558818344231906  | 6.8268744597530135  | O63 |
| 11.6827365381372026 | 4.6114964240527652  | 20.5192571306869738 | O64 |
| 2.6720430922501017  | 4.6648451643328483  | 6.8274936001409694  | O65 |
| 4.2692874543343429  | 8.0123784914255118  | 20.4677408570464294 | O66 |
| 7.2012980712088535  | 0.0228595931793001  | 4.7508706300816668  | O67 |
| 6.8928134802523049  | 0.0704814879081528  | 22.5725089428353805 | O68 |
| 10.6323135286822499 | 6.3388850800115630  | 4.7297803173538391  | O69 |
| -3.3485197648364311 | 6.1762459686124744  | 22.6098382870102022 | O70 |
| 3.4336541655983814  | 6.1601234206812459  | 4.7535647772735574  | O71 |
| 3.7849286218059395  | 6.4373735518271848  | 22.5941834499263585 | O72 |
| 7.1367145252770827  | 0.0056895464470010  | 8.8481502409424575  | O73 |
| 6.8975930329197785  | -0.0447803713263165 | 18.4581116334993425 | O74 |
| 10.6748420528874295 | 6.2937863673528573  | 8.8543599192298252  | O75 |
| 10.8308888883419510 | 6.0763339101344691  | 18.4636223982767618 | O76 |
| 3.4697659204895017  | 6.2026420918445968  | 8.8417968936331093  | O77 |
| 3.5806512667098067  | 6.4282619234609886  | 18.4416892551614922 | O78 |
| 4.7168488838021760  | 1.1395281676445257  | 8.9433561894657139  | O79 |
| 2.0323348545118520  | 11.2099777352066106 | 18.3973039451047029 | O80 |
| 10.8869491776476757 | 3.6294599875530014  | 8.9250256598732207  | O81 |
| -3.6835552428306206 | 8.7418203411582383  | 18.4681123608367557 | O82 |
| 5.6497902217444933  | 7.7483143541752755  | 8.9692580110805551  | O83 |
| 1.3102274100082236  | 5.0340158295175614  | 18.4621546594494568 | O84 |
| 2.3167907587343466  | 11.3334477974492742 | 9.0485655928431949  | O85 |
| 4.5801498191493213  | 1.2933444926918716  | 18.3170813855024264 | O86 |
| -3.9620963315314168 | 8.9547482822153661  | 9.0747865423275424  | O87 |
| 10.8261714422617743 | 3.4114173761005651  | 18.3252093271004135 | O88 |
| 1.2546932814850473  | 4.7107732221128886  | 9.0500338419649164  | O89 |
| 5.8850624733357604  | 7.8033213767076086  | 18.3860308201539304 | O90 |
| -1.3116684942257724 | 4.7100140846807674  | 18.3241983818226899 | O91 |
| 8.2849545205268242  | 7.4753844077963034  | 8.9735557137893469  | O92 |
| -2.6445911470012793 | 11.1601120543668042 | 18.3040643284183062 | O93 |

---

|                     |                     |                     |      |
|---------------------|---------------------|---------------------|------|
| 9.3582496586080239  | 1.4693226262488304  | 9.0166268622938581  | O94  |
| 3.5973714484864097  | 9.0941589906944351  | 18.1979328052457845 | O95  |
| 3.6271962860953746  | 3.5501824559337409  | 9.0139808517057052  | O96  |
| 8.4889811677884666  | 7.3564092677324959  | 18.4341720232594639 | O97  |
| -1.3563385490672553 | 5.1371480099298976  | 8.8629388597637870  | O98  |
| 9.1458121831211070  | 1.3719442955053123  | 18.3795929054372138 | O99  |
| -2.2741669516817957 | 10.9923361978082834 | 8.8836187369199848  | O100 |
| 3.6587033300330720  | 3.7647255764423377  | 18.4378533973420033 | O101 |
| 3.2356925643704049  | 8.8552564173203017  | 8.8555525676977176  | O102 |
| 5.9841314874544818  | 3.1183893640134421  | 10.1915733378887339 | O103 |
| 1.1926888381276575  | 9.0463574245504219  | 17.0648584386183835 | O104 |
| 8.5571990153565913  | 3.7175809832741353  | 10.2094964905525529 | O105 |
| -1.4362931909788612 | 9.1161509231503999  | 17.0851854157309724 | O106 |
| 6.7491771551974615  | 5.6441024006323666  | 10.1633815282902571 | O107 |
| -0.1749537684372116 | 6.7927650600055580  | 17.1183748782733822 | O108 |
| 1.0066567546372394  | 9.3461906011491429  | 10.2290937906030805 | O109 |
| 5.8636835005126144  | 3.2430703673194978  | 17.0223321519866495 | O110 |
| -1.5798778334900234 | 8.8058228289531755  | 10.2384261246897363 | O111 |
| 8.4922502442419301  | 3.5848601041607728  | 17.0453456733609556 | O112 |
| 0.1799522876105724  | 6.8343525722651703  | 10.2272081360577687 | O113 |
| 6.8756850621878982  | 5.6741199540186216  | 17.1415710314969374 | O114 |
| 3.8457525304508851  | 2.0912342035114149  | 11.2458981672303633 | O115 |
| 3.0691953366076836  | 10.5639145223677140 | 16.0566615265440440 | O116 |
| 10.5449103037364953 | 2.3876494403229067  | 11.2271214580156240 | O117 |
| -3.6984258816483306 | 10.0054261635582957 | 16.1482101975322081 | O118 |
| 6.9707489954748043  | 7.9929016629080669  | 11.2449598271955669 | O119 |
| 0.2033843307157719  | 4.3955517452785573  | 16.1541147669914729 | O120 |
| 3.3184217348788971  | 10.1016706648985455 | 11.1909264442202971 | O121 |
| 3.5197162371114645  | 2.4487403499197469  | 16.1623787580900711 | O122 |
| -3.3803185808789413 | 10.4258488793540014 | 11.2239553379098496 | O123 |
| 10.3403429841530947 | 1.9795983798177421  | 16.1209056689084385 | O124 |
| -0.3087603001401260 | 4.4530009087189741  | 11.1950893631926558 | O125 |
| 7.3382361103329119  | 8.0691620362392644  | 16.1641643806845785 | O126 |
| 2.2811260071891692  | -0.0006413905566969 | 11.8088172318144196 | O127 |
| 12.0212911947870005 | 0.0011261583484360  | 15.4792649229944654 | O128 |
| 13.1283317137427566 | 2.0739628147740543  | 11.8331986373506357 | O129 |
| 8.2130583704378441  | 10.4991303188248946 | 15.4664792979152903 | O130 |
| 5.8966795517881536  | 10.3804170688681197 | 11.7666226917840167 | O131 |
| 1.0038455708431508  | 1.9586445653823170  | 15.4297236673235290 | O132 |
| 11.5406446041565989 | -0.0064953468620800 | 11.6739101090425805 | O133 |
| 2.7135794105132653  | -0.0187897803380983 | 15.6945687971868768 | O134 |
| 8.4969695665158778  | 10.0671662065858261 | 11.7594374148801961 | O135 |
| 12.8732272112855650 | 2.4953659010270570  | 15.6370752963872697 | O136 |
| 1.2943991653752638  | 2.4344121030008470  | 11.7571327594262502 | O137 |

---

---

|                     |                     |                     |      |
|---------------------|---------------------|---------------------|------|
| 5.6307887270513772  | 10.0163748657207776 | 15.6712264553493785 | O138 |
| 3.0128616567698652  | 1.7380624332372634  | 13.6929290194180879 | O139 |
| 4.0326167473782828  | 10.7111625272922453 | 13.6389959967020644 | O140 |
| 11.2143650885992106 | 1.7622251116575516  | 13.6644367792260208 | O141 |
| -4.2274846523357938 | 10.7380905304184342 | 13.6902521241183663 | O142 |
| 7.0382031081608476  | 8.9066508013889063  | 13.6875854226433677 | O143 |
| -0.1372426542025902 | 3.6192022492000082  | 13.6752367210999548 | O144 |
| -0.1556098325990272 | 8.2157947113720624  | 26.2444332446028632 | O145 |
| 7.1639146810347913  | 4.0426812258669624  | 26.2792475623543034 | O146 |
| 4.9649854872282422  | 2.8854206037197012  | 4.5564183859444585  | Si1  |
| 1.9367521592558967  | 9.6625946619543370  | 22.7597986634019485 | Si2  |
| 9.2783251690054414  | 2.9690157957760168  | 4.5370944301735925  | Si3  |
| -2.2978538308420773 | 9.5721656383723470  | 22.7513800102005952 | Si4  |
| 7.0528715325514426  | 6.6521717830465601  | 4.5733041004351946  | Si5  |
| -0.0410129089267652 | 5.8634503633840085  | 22.7395640346505665 | Si6  |
| 1.9926701838831882  | 9.6253353252317453  | 4.5881978089479336  | Si7  |
| 5.0063789021278087  | 2.8709616277195096  | 22.7706620228647303 | Si8  |
| -2.2835549895666039 | 9.5230269660857392  | 4.5623462248042035  | Si9  |
| 9.2402964785542494  | 3.0579500639999222  | 22.7425275643235771 | Si10 |
| -0.0600489960408366 | 5.8656502543068170  | 4.5738119039617242  | Si11 |
| 4.5320058234314216  | 2.4837338210541340  | 9.8349381221489516  | Si12 |
| 2.4665368074504839  | 9.9760658386237875  | 17.4400307595128581 | Si13 |
| 9.8354390373474221  | 2.7875631849825924  | 9.8307530363964464  | Si14 |
| -2.8637250577491664 | 9.7605840439610763  | 17.5151389014324010 | Si15 |
| 6.9261962078784585  | 7.2216208850474555  | 9.8236166078153335  | Si16 |
| -0.0022898173868691 | 5.2296882472074762  | 17.5282954327327225 | Si17 |
| 2.4751813876148505  | 9.9138477531580094  | 9.8206863235944244  | Si18 |
| 4.4130057285039799  | 2.6819419023544051  | 17.4936191241946162 | Si19 |
| -2.8063793266911441 | 9.7988138890279366  | 9.8446212633460650  | Si20 |
| 9.7084985183938421  | 2.5951866558180550  | 17.4806020157048110 | Si21 |
| -0.0566609685830901 | 5.2762628056873835  | 9.8238386873551864  | Si22 |
| 7.1504439768848478  | 7.2232237374693637  | 17.5372310749548603 | Si23 |
| 2.6049137178927046  | 1.5601532997536027  | 12.1296144784843545 | Si24 |
| 4.3866708507046610  | 10.9514572962505916 | 15.2038943764994521 | Si25 |
| 11.6128413487818172 | 1.5553261455447032  | 12.1040955876445615 | Si26 |
| -4.6650881164018410 | 10.9285634581950220 | 15.2444195788449548 | Si27 |
| 7.0954592866919057  | 9.3423621283854583  | 12.1216470460540222 | Si28 |
| -0.1213477360228494 | 3.1168479921950611  | 15.2234863060760794 | Si29 |
| 4.3964563997462829  | 10.9239169314395248 | 12.0705427142649135 | Si30 |
| 2.5622118803495137  | 1.5333446384367486  | 15.2405245029568679 | Si31 |
| -4.6216855539176729 | 10.9356180300330568 | 12.1250441294595568 | Si32 |
| 11.6146556075623621 | 1.5592259108290853  | 15.2259475384544558 | Si33 |
| -0.1157933623737726 | 3.1422720846502705  | 12.1202589253789643 | Si34 |
| 7.0603864969105681  | 9.3702305879577050  | 15.2455406912015103 | Si35 |

---

---

|                     |                     |                     |      |
|---------------------|---------------------|---------------------|------|
| -1.5952159918308508 | 12.4618034357923229 | 5.1499255558311052  | Si36 |
| 8.4642953190713488  | 0.0961307696605754  | 22.1508526064132880 | Si37 |
| 11.4732910004293931 | 5.0034528647040695  | 5.1383766195731111  | Si38 |
| -4.3603590169640283 | 7.3947674094449143  | 22.2116516696405277 | Si39 |
| 4.1908303688252984  | 7.5472541288872863  | 5.1493726333682757  | Si40 |
| 2.9257249837937485  | 5.0914614887944403  | 22.1860757241351862 | Si41 |
| 8.7651520002065020  | 0.0491704190330705  | 5.2166504655170369  | Si42 |
| 5.3246596590115374  | 0.0065727038464144  | 22.1151948106552005 | Si43 |
| 9.8420285907539462  | 7.6831395785416499  | 5.2109805864898515  | Si44 |
| -2.7423336818668353 | 4.7431911319352720  | 22.1328510042179118 | Si45 |
| 2.6848104426975876  | 4.7857840864580146  | 5.2128414998405797  | Si46 |
| 4.2933770987145197  | 7.8771192253837690  | 22.0676058619912894 | Si47 |
| -1.6378528661799505 | 12.3912275625445343 | 8.3709462456400878  | Si48 |
| 8.4570584596215230  | 0.0214119355256032  | 18.9304801789185149 | Si49 |
| -2.8907672833421887 | 5.0005713537846246  | 8.3606900865415810  | Si50 |
| 10.0135461488995112 | 7.3922030820527711  | 18.9828633799366564 | Si51 |
| 4.1499988841136695  | 7.6099440809288250  | 8.3684692733405406  | Si52 |
| 2.8480292027133012  | 5.0610746973675189  | 18.9611913217185553 | Si53 |
| 8.7162299745892415  | 0.0978063953074140  | 8.4420981651699698  | Si54 |
| 5.3229803967467486  | -0.0292590693780204 | 18.8922569763858412 | Si55 |
| 9.8086559741541137  | 7.6155887991785516  | 8.4389621113269602  | Si56 |
| 11.6081609566420578 | 4.7068174130287614  | 18.9086669668871004 | Si57 |
| 2.7566625543054206  | 4.7895769210631292  | 8.4384953611662326  | Si58 |
| 4.3335524335118372  | 7.8130819586079427  | 18.8535221786664948 | Si59 |
| 7.0952678766507535  | 4.1605484427302404  | 2.6862333671608787  | Si60 |
| -0.1731733589201916 | 8.3272387287261029  | 24.6238074947100998 | Si61 |
| -0.1092832559926498 | 8.3301453643684891  | 2.7087120462476530  | Si62 |
| 7.0346414749756399  | 4.1540686701665459  | 24.6537703619511888 | Si63 |
| 7.0962412229895335  | 4.1669128850460204  | 6.4192186949394419  | Si64 |
| -0.1301504772211857 | 8.3527336071664582  | 20.8734126363637031 | Si65 |
| -0.1204316879979705 | 8.3364520286161454  | 6.4543618790735522  | Si66 |
| 7.0608415041698365  | 4.1864367410729946  | 20.8532366819219668 | Si67 |
| 7.1028173333682609  | 4.1530028201079121  | 9.6453890547538066  | Si68 |
| -0.1387023201876723 | 8.3238885992246932  | 17.6405565853731687 | Si69 |
| -0.1329206101534925 | 8.3295587766291259  | 9.6847448837788281  | Si70 |
| 7.0804818270648866  | 4.1380409722194988  | 17.6279784266776858 | Si71 |
| 7.0632469561310280  | 6.5906009086456114  | 22.7622922645714887 | All  |
| 7.6959385177455282  | 4.5649255279315426  | 0.5503127191440264  | H1   |
| -0.1196425098481750 | 9.0637444854758797  | 0.5762416134673085  | H2   |
| -0.2459323207094322 | 9.0285561032868156  | 26.7647625371457814 | H3   |
| 6.6418786991895127  | 4.6745587443068564  | 26.7963996134918787 | H4   |
| 6.3395929183118307  | 9.8123924558407776  | 24.6022538288824002 | H5   |
| 5.4657266524615471  | 10.1085700581769071 | 22.3185788894959281 | H6   |
| -7.1305988883719378 | 11.0084310197819590 | 23.6997400897480048 | H7   |

---

|                     |                     |                     |     |
|---------------------|---------------------|---------------------|-----|
| 7.9574805518546121  | 9.3722785524719257  | 23.9517877372972734 | H8  |
| -7.0354698235193327 | 10.7890282231825783 | 21.0576498118730271 | H9  |
| 6.7878608924335326  | 9.2913111409082543  | 20.3326842465377773 | H10 |
| 8.2542916533880728  | 9.2607625443190251  | 21.3523874990763893 | H11 |
| -0.2105660535155914 | 1.8891706147329974  | 22.1394057485680129 | H12 |
| 12.0082926808923389 | 0.8274131843589771  | 21.7297183760501831 | H13 |
| 4.3728200246447226  | 12.1055671558695082 | 19.5960321898004572 | H14 |
| 6.1597619744986334  | 11.9794043554941823 | 17.8624203659006220 | H15 |
| 1.1544847267530463  | 0.5322546426121663  | 18.2755195835204169 | H16 |
| 1.5859544775627263  | 1.7306558504638168  | 20.4204723757102897 | H17 |
| 7.2647706535328247  | 9.7097099876096529  | 21.2273517254911681 | C1  |
| 6.4003165431066220  | 9.5474979932866191  | 22.4545862442886488 | C2  |
| 7.0380399632963986  | 9.9418250356691047  | 23.7645515040620658 | C3  |
| -0.3930620126089739 | 1.3504785698580264  | 21.2069570552753355 | C4  |
| 12.7959834539037711 | 0.7540400665122580  | 20.9759737635366861 | C5  |
| 12.5586943839972509 | 0.0762190963029665  | 19.7754960351339122 | C6  |
| 13.5616277546274588 | 0.0000200538218327  | 18.8037790484037401 | C7  |
| 0.3722848722550391  | 0.5955415932560052  | 19.0352648595602894 | C8  |
| 0.6128027179463823  | 1.2685254556723748  | 20.2376771170146981 | C9  |

TS2

|                     |                     |                     |     |
|---------------------|---------------------|---------------------|-----|
| 6.9929156336962590  | 4.1149814708193881  | 1.0783758485953543  | O1  |
| -0.0768121811090392 | 8.2117233136497578  | 1.0995568996242104  | O2  |
| 5.7482690623788599  | 3.3842626081723091  | 3.2432614039149459  | O3  |
| 1.2233584178833983  | 8.9447811908527299  | 24.0954325589921652 | O4  |
| 8.4293362192540222  | 3.3605401133394346  | 3.2235029004710136  | O5  |
| -1.4187964481632642 | 9.1102058866457156  | 24.0795228721352075 | O6  |
| 7.1276383346572452  | 5.6811435331501174  | 3.2633748894595112  | O7  |
| -0.2325772394327519 | 6.6967322636149058  | 24.1080997597850022 | O8  |
| 1.0789594658311943  | 9.2730193520979629  | 3.2904219120070728  | O9  |
| 5.8583780938161718  | 3.0671005350635081  | 24.1139020120541900 | O10 |
| -1.5500157455150414 | 8.8884148860539156  | 3.2498006186104291  | O11 |
| 8.4838843519830682  | 3.4148406760587502  | 24.1183648024992614 | O12 |
| 0.0976118193567719  | 6.7800324398011282  | 3.2695677248296287  | O13 |
| 6.8442393809138178  | 5.5557093174976941  | 24.2301270523330459 | O14 |
| 4.8629927498939516  | 1.2383639960739352  | 4.5523191638802949  | O15 |
| 1.8913898696214808  | 11.1918635897333481 | 22.8366465643649619 | O16 |
| 10.7287107442437932 | 3.6622317881637465  | 4.5430072639425285  | O17 |
| -3.7035520019152264 | 8.7986540112486278  | 22.7370753275149333 | O18 |
| 5.6908271940999144  | 7.5174964238063371  | 4.5640387765495385  | O19 |
| 1.2867280718440233  | 4.9545701042050876  | 22.7616102574731727 | O20 |
| 2.3073189421102303  | 11.1918008811945882 | 4.6615864237315137  | O21 |
| 4.4853104490707443  | 1.2846856983999766  | 22.7039112943409727 | O22 |
| -3.8247745554275863 | 8.9681798902998118  | 4.6318180305284695  | O23 |
| 10.7755941968496494 | 3.4515778204089509  | 22.7579149837111814 | O24 |

---

|                     |                     |                     |     |
|---------------------|---------------------|---------------------|-----|
| 1.1537157700436254  | 4.7645695225821871  | 4.6515280562645227  | O25 |
| 5.7787775374220276  | 7.8273156396435741  | 22.7779361081008354 | O26 |
| -1.3147404836776644 | 4.6859072966134088  | 22.7096586448147768 | O27 |
| 8.3255535720509819  | 7.6361187203946290  | 4.6145316186790923  | O28 |
| -2.5525855680478604 | 11.1428396043479960 | 22.7772183284144738 | O29 |
| 9.4927197777887535  | 1.3300168140002264  | 4.5881977897125141  | O30 |
| 3.5119874973638012  | 9.1355853092595627  | 22.7379297799632063 | O31 |
| 3.4559121331723346  | 3.4696114108646947  | 4.6026569007020921  | O32 |
| 8.5407276054440793  | 7.4332483309991195  | 22.8481309910355037 | O33 |
| -1.4741765572787648 | 5.0370800157919984  | 4.5251501963666767  | O34 |
| 9.2791950737515378  | 1.2892540340893015  | 22.7343231683073306 | O35 |
| -2.2877582580584441 | 11.1180747464630869 | 4.5003310550185702  | O36 |
| 3.6308834865782571  | 3.7937010219683933  | 22.8377557244117746 | O37 |
| 3.3892439226502322  | 8.7794022014145590  | 4.5254952802851891  | O38 |
| 5.7740589617502680  | 3.3401452285287250  | 5.9122242530129689  | O39 |
| 1.2242313698344125  | 9.0223605522415067  | 21.4131612744147795 | O40 |
| 8.4520035415216004  | 3.4038299999707600  | 5.8961997066420979  | O41 |
| -1.4297405252398669 | 9.1466610902442973  | 21.3999351792815453 | O42 |
| 7.0586448105725061  | 5.6889744920414396  | 5.9359408403133989  | O43 |
| -0.2023192876150430 | 6.7542412051095377  | 21.4421225852304573 | O44 |
| 1.1655478650368956  | 9.1734384510270637  | 5.9603279445877471  | O45 |
| 5.8230571628837318  | 3.1515587388789528  | 21.4180705607377995 | O46 |
| -1.5039684798787225 | 8.9929068443355273  | 5.9239296286412095  | O47 |
| 8.4766624899870564  | 3.4692225800498755  | 21.4210195512275803 | O48 |
| -0.0114522387117977 | 6.7729426395674084  | 5.9401063476656137  | O49 |
| 6.8658239347182528  | 5.6268096619496664  | 21.3638816738202841 | O50 |
| 7.1144512245464373  | 4.1020950610094511  | 8.0355393209027266  | O51 |
| -0.1293338518336755 | 8.2617051399838886  | 19.2901243646086691 | O52 |
| -0.1498107187740176 | 8.3098084964663883  | 8.0724332397604837  | O53 |
| 7.0728074079049144  | 3.9828095248029478  | 19.2768549295865128 | O54 |
| -1.7354787832602288 | 12.3920008566448931 | 6.7636020995741424  | O55 |
| 8.5800373919572355  | -0.0687091787482690 | 20.5560375926359526 | O56 |
| 11.5448700639551607 | 4.8730059580106113  | 6.7699326200955214  | O57 |
| 9.9731916864397974  | 7.4718411074176236  | 20.5854152435785736 | O58 |
| 4.2204064872512621  | 7.6461741884281214  | 6.7786322459601500  | O59 |
| 2.7976066350267108  | 4.9037171299268278  | 20.5826322380330744 | O60 |
| 8.8704943219077119  | 0.0707456912392267  | 6.8417150578532473  | O61 |
| -2.0636655492342024 | 12.4127515366478836 | 20.5208183366469150 | O62 |
| 9.7716080181528469  | 7.7394901063355626  | 6.8373579939140328  | O63 |
| 11.6122985310648055 | 4.6190955175557766  | 20.5346925214093332 | O64 |
| 2.6520162655119583  | 4.6397341446878606  | 6.8448605028328418  | O65 |
| 4.3259693555554941  | 7.9374306441073186  | 20.5427832364025704 | O66 |
| -0.0126290467637125 | 12.4875612259507616 | 4.7607563972425160  | O67 |
| 6.8738381363319396  | 0.1122508693025402  | 22.5630583890241603 | O68 |

---



---

|                     |                     |                     |      |
|---------------------|---------------------|---------------------|------|
| 10.6269820032306122 | 6.3129423830783189  | 4.7526110824394143  | O69  |
| -3.5248694032225343 | 6.1301768255785012  | 22.6348497708917442 | O70  |
| 3.4344346292690737  | 6.1223559735574771  | 4.7685391384267009  | O71  |
| 3.4500490006526516  | 6.4763675139268457  | 22.6014833014255245 | O72  |
| -0.0823865249880376 | 12.4798469346672025 | 8.8538406172124997  | O73  |
| -0.3359704518597324 | 12.4546105791884170 | 18.4904283811143380 | O74  |
| 10.6567652719341126 | 6.2682652014526798  | 8.8630610301043937  | O75  |
| 10.7965655158672753 | 6.0687000771505950  | 18.4615481516631945 | O76  |
| 3.4567245858352051  | 6.1680215147273669  | 8.8637628749776134  | O77  |
| 3.5447463340741781  | 6.4070872811527027  | 18.4964732255856177 | O78  |
| 4.7117470932205627  | 1.1094231925997833  | 8.9502875957691881  | O79  |
| 1.9969203702513179  | 11.1781769588774367 | 18.3723882361229904 | O80  |
| 10.8775804660036286 | 3.6049012654285733  | 8.9613003427813513  | O81  |
| -3.7079332826605409 | 8.7350993157996797  | 18.4358437037241565 | O82  |
| 5.6375677443331407  | 7.7135821385732681  | 8.9783016417496686  | O83  |
| 1.2768818634342578  | 5.0092255471597014  | 18.4656923288924233 | O84  |
| 2.3114418451758620  | 11.3023535096556014 | 9.0612245197603603  | O85  |
| 4.5556223540407075  | 1.2784229001148890  | 18.3440253918426137 | O86  |
| -3.9735742058327781 | 8.9316148625280540  | 9.0835682467246315  | O87  |
| 10.8165816080705781 | 3.3888453673105761  | 18.3385408745416818 | O88  |
| 1.2367397892143015  | 4.6838425124094103  | 9.0714526620833471  | O89  |
| 5.8535314059804229  | 7.7777095953236648  | 18.3874162924909363 | O90  |
| -1.3388610373864600 | 4.6882228674209463  | 18.3615029527970961 | O91  |
| 8.2717823298392350  | 7.4534396962501335  | 8.9831525191846140  | O92  |
| -2.6623400499746350 | 11.1504969523819462 | 18.3050459299600696 | O93  |
| 9.3583987574278904  | 1.4379485079972136  | 9.0324957503287955  | O94  |
| 3.5845390036600158  | 9.0768160575773358  | 18.3102918783481385 | O95  |
| 3.6041918381599278  | 3.5131806678929967  | 9.0239789629835716  | O96  |
| 8.4609775962434401  | 7.3685658273628620  | 18.4511771336485282 | O97  |
| -1.3719348584092277 | 5.1192204336151708  | 8.8835981971046909  | O98  |
| 9.1575647791673429  | 1.3333610795134099  | 18.4162806216045674 | O99  |
| -2.2743829016230306 | 10.9615451118369265 | 8.8796225391789427  | O100 |
| 3.6193752715100742  | 3.7486510472515429  | 18.4000360275589188 | O101 |
| 3.2242313190385925  | 8.8209134208458782  | 8.8878004113725417  | O102 |
| 5.9642482535242305  | 3.0942704036185513  | 10.2019282239493858 | O103 |
| 1.2134562659853572  | 8.9588597930932572  | 17.1024930264841473 | O104 |
| 8.5387956340110662  | 3.6772585833507732  | 10.2303410150886993 | O105 |
| -1.4123047639677084 | 9.1154344653048014  | 17.1237645489169878 | O106 |
| 6.7439023757876972  | 5.6142100942750384  | 10.1763589706774216 | O107 |
| -0.2264768888541915 | 6.7576150719381518  | 17.1065619130665425 | O108 |
| 0.9896585780780800  | 9.3267356719020142  | 10.2463733846440412 | O109 |
| 5.8594909008969367  | 3.2113629109866451  | 17.0475640746313317 | O110 |
| -1.5948313214053771 | 8.7817791026320347  | 10.2504258941983295 | O111 |
| 8.4790132194893317  | 3.5452301459531865  | 17.0705986680201676 | O112 |

---

|                     |                     |                     |      |
|---------------------|---------------------|---------------------|------|
| 0.1699581097242513  | 6.8140706292772100  | 10.2440779508932778 | O113 |
| 6.8730697006924961  | 5.6370300226388634  | 17.1787590075109833 | O114 |
| 3.8306693012567563  | 2.0530411304850222  | 11.2522781459013625 | O115 |
| 3.0859019477951106  | 10.4561467209292687 | 16.0858200697010716 | O116 |
| 10.5216000805352436 | 2.3517312652652160  | 11.2584439079185312 | O117 |
| -3.6462637533854130 | 9.9899677308927899  | 16.1166084036596331 | O118 |
| 6.9529671870045338  | 7.9584118460339957  | 11.2559501305364371 | O119 |
| 0.1563214485781943  | 4.3577313950118866  | 16.1728467631949471 | O120 |
| 3.2976361866953958  | 10.0758069418281231 | 11.2184951437105447 | O121 |
| 3.5409573757311956  | 2.4005842131375452  | 16.1497606326702758 | O122 |
| -3.3941748488303563 | 10.4205465250355065 | 11.2173243611573294 | O123 |
| 10.3263430383341568 | 1.9535086766647813  | 16.1407480053235055 | O124 |
| -0.3291784229679773 | 4.4398074745234517  | 11.2208703553039939 | O125 |
| 7.3140461113716118  | 8.0102425140152320  | 16.1653076873454609 | O126 |
| -4.9736546481164812 | 12.4753836170936587 | 11.8061515790382856 | O127 |
| 4.7675681384253812  | 12.4525243329801736 | 15.5452624524797276 | O128 |
| 13.1103856763956923 | 2.0515829215705121  | 11.8358187071751964 | O129 |
| 8.2349442202237633  | 10.4313208003473328 | 15.5040517588768321 | O130 |
| 5.8795446213811164  | 10.3416925904799033 | 11.7892084847188396 | O131 |
| 1.0025846527817659  | 1.9344062146465382  | 15.4734434789733157 | O132 |
| 4.3211074866098222  | 12.4602637922443620 | 11.6793100592702910 | O133 |
| -4.5172732709980092 | 12.4440706423444283 | 15.6890157710356277 | O134 |
| 8.4807997846404550  | 10.0362925434241763 | 11.7383916116373399 | O135 |
| 12.8703264044303918 | 2.4277440841393085  | 15.6662294862242177 | O136 |
| 1.2775860653329523  | 2.4196609501554178  | 11.7494941559787627 | O137 |
| 5.6489074572232347  | 9.9906438093027781  | 15.6765838752321951 | O138 |
| 2.9747516557081752  | 1.7103584883427743  | 13.6931787541635099 | O139 |
| 4.0228440244583394  | 10.6973414832992706 | 13.6628398100345798 | O140 |
| 11.2193543107425651 | 1.7028030692358884  | 13.6872942677938632 | O141 |
| -4.2566470190260866 | 10.7073239106413460 | 13.6777338595425419 | O142 |
| 7.0551960496949953  | 8.8772329714108320  | 13.6938694728429375 | O143 |
| -0.1530063947600750 | 3.5666580725747710  | 13.6927046379321897 | O144 |
| -0.1686912494066961 | 8.1531002710101070  | 26.2630115264314448 | O145 |
| 7.1318742631919765  | 3.8602027526039531  | 26.3209244206972457 | O146 |
| 4.9617788249543651  | 2.8592929530809115  | 4.5684046024784575  | Si1  |
| 1.9506478649596382  | 9.5708113919893236  | 22.7797244354350603 | Si2  |
| 9.2730358463628182  | 2.9411417851517450  | 4.5532513900199598  | Si3  |
| -2.2661792993439245 | 9.5391989090606106  | 22.7574425497795154 | Si4  |
| 7.0497514438136140  | 6.6275819183552169  | 4.5871561487561063  | Si5  |
| -0.1102158828991224 | 5.7815157123907968  | 22.7656341230937507 | Si6  |
| 1.9885541734686401  | 9.5975379485357735  | 4.6034498506719217  | Si7  |
| 4.9640624375866382  | 2.8563572463996287  | 22.7816612460275820 | Si8  |
| -2.2864420384678459 | 9.4957254092782595  | 4.5708878554746457  | Si9  |
| 9.2270352524540353  | 2.9229553108310857  | 22.7686129073859185 | Si10 |

---

|                     |                     |                     |      |
|---------------------|---------------------|---------------------|------|
| -0.0648120477642227 | 5.8396367765185762  | 4.5895610494292765  | Si11 |
| 4.5167846892467107  | 2.4519411019847221  | 9.8427826206074513  | Si12 |
| 2.4674520877410338  | 9.9121025033903152  | 17.4816033365580132 | Si13 |
| 9.8228815592535685  | 2.7546109444831717  | 9.8562912193827099  | Si14 |
| -2.8536941905901672 | 9.7502679056246073  | 17.5100580387683884 | Si15 |
| 6.9148439866816833  | 7.1908406749506746  | 9.8329938998307682  | Si16 |
| -0.0387662038365253 | 5.2052376300326468  | 17.5403186086279632 | Si17 |
| 2.4620522943164769  | 9.8867450370892982  | 9.8431140636540118  | Si18 |
| 4.4025143266059645  | 2.6562096485363389  | 17.4987313901360970 | Si19 |
| -2.8161098985146165 | 9.7776185693312261  | 9.8474389027315805  | Si20 |
| 9.6950515628425311  | 2.5614154735124730  | 17.5064884901000433 | Si21 |
| -0.0722592544140603 | 5.2562674764398416  | 9.8445826158074308  | Si22 |
| 7.1224254058129723  | 7.1926066471779899  | 17.5578403614511309 | Si23 |
| 2.5793215372711469  | 1.5336978052741490  | 12.1279174536436045 | Si24 |
| 4.3807258817365664  | 10.9006878418791207 | 15.2315760735933328 | Si25 |
| 11.6024373565146437 | 1.5191538428623661  | 12.1194791081844606 | Si26 |
| -4.6585268249681588 | 10.8906963667080170 | 15.2406755897025032 | Si27 |
| 7.0871561950576423  | 9.3091981705293669  | 12.1270201645614399 | Si28 |
| -0.1368736988642016 | 3.0740653166358363  | 15.2418614505747598 | Si29 |
| 4.3836069031110121  | 10.8944369811165132 | 12.0915422339701966 | Si30 |
| 2.5561264673462274  | 1.4991480149058145  | 15.2477170109359275 | Si31 |
| -4.6456450857151772 | 10.9131007547225050 | 12.1139394430564113 | Si32 |
| 11.5975152095654881 | 1.5096894201717959  | 15.2540947339860349 | Si33 |
| -0.1331678675784242 | 3.1174672334822113  | 12.1288610109829946 | Si34 |
| 7.0686147906656238  | 9.3218999189694021  | 15.2565663456161964 | Si35 |
| -1.5933282528311805 | 12.4336985824697752 | 5.1557330348029531  | Si36 |
| 8.4498153593056831  | 0.0196500105787370  | 22.1661744717035241 | Si37 |
| 11.4651864921330908 | 4.9752986782177437  | 5.1598477127119278  | Si38 |
| 9.9966374968034977  | 7.4228902497616147  | 22.2144656081587435 | Si39 |
| 4.1810884877377390  | 7.5136244821358682  | 5.1694686676687436  | Si40 |
| 2.8147256026597454  | 5.0383893324712767  | 22.1961768172243232 | Si41 |
| 8.7675320686699401  | 0.0202133919931226  | 5.2272422691450382  | Si42 |
| -1.9111485302160895 | 12.4981333150338294 | 22.1326064292802478 | Si43 |
| 9.8358780218211166  | 7.6608465964272128  | 5.2223437159436381  | Si44 |
| 11.5808635818037100 | 4.7287449489427509  | 22.1532376415766983 | Si45 |
| 2.6768742818467937  | 4.7533995559257871  | 5.2300721817693603  | Si46 |
| 4.3038411486901769  | 7.8071571430964202  | 22.1739581582835079 | Si47 |
| -1.6397550747794982 | 12.3645029635907466 | 8.3754306577753610  | Si48 |
| 1.2303165531956877  | 12.4827401925233499 | 18.9499931784449949 | Si49 |
| 11.5278525686952626 | 4.9726302969106095  | 8.3820703261550129  | Si50 |
| 9.9910281667698015  | 7.3948878415380825  | 18.9813945673465838 | Si51 |
| 4.1332633122427955  | 7.5767370517913113  | 8.3894358482754878  | Si52 |
| 2.8163400852489171  | 5.0266907798765725  | 18.9773044163246389 | Si53 |
| 8.7154266311799287  | 0.0690973496941444  | 8.4525383342451672  | Si54 |

---

|                     |                     |                     |      |
|---------------------|---------------------|---------------------|------|
| -1.9131878568705023 | 12.4560988894626075 | 18.9128150639832420 | Si55 |
| 9.7954576069057850  | 7.5934350803566542  | 8.4486248952664766  | Si56 |
| 11.5685816926056297 | 4.7029912192154146  | 18.9241767159640482 | Si57 |
| 2.7376992728146905  | 4.7591089665048329  | 8.4562725381301416  | Si58 |
| 4.3252393099248483  | 7.7707566394598580  | 18.9409226907154959 | Si59 |
| 7.0856651625925045  | 4.1424740476415325  | 2.7001677886081135  | Si60 |
| -0.1498580498047497 | 8.2361700855771183  | 24.6403478087809589 | Si61 |
| -0.1128808136204729 | 8.3016194812728568  | 2.7211231675350405  | Si62 |
| 7.0683207082579695  | 4.0374864155483641  | 24.6940047148596520 | Si63 |
| 7.0985571555507594  | 4.1353418689991770  | 6.4332441532760569  | Si64 |
| -0.1361098698259759 | 8.2897693329922824  | 20.8972340384817237 | Si65 |
| -0.1245256716894581 | 8.3124975262996994  | 6.4680183858630942  | Si66 |
| 7.0540588402879436  | 4.1122404859093393  | 20.8967941404238076 | Si67 |
| 7.0903223637705377  | 4.1219991467131170  | 9.6591593991223199  | Si68 |
| -0.1411318771167140 | 8.2748260886098031  | 17.6659219300061885 | Si69 |
| -0.1459135999479155 | 8.3076506095132441  | 9.6990790579960322  | Si70 |
| 7.0725636522415103  | 4.1015591186766587  | 17.6671426474364921 | Si71 |
| 7.0161650046084096  | 6.5843009601426337  | 22.8351230020353206 | All  |
| 7.6914724407507276  | 4.5503085209078797  | 0.5666410035469830  | H1   |
| -0.1184350153988287 | 9.0335579764989316  | 0.5875417001307420  | H2   |
| -0.1582015627839661 | 8.9803606981762858  | 26.7682276308454732 | H3   |
| 6.7682070324681449  | 4.5969246425687977  | 26.8349006565532626 | H4   |
| 6.5617259577739375  | 10.6669161094558511 | 23.9978341690038377 | H5   |
| 6.5759293121199951  | 9.6918216565783712  | 21.7344597017270083 | H6   |
| 8.1187554005717963  | 11.5616200736508485 | 23.6658696796590107 | H7   |
| 8.0429774806368091  | 9.7687041791762166  | 23.7067855446872144 | H8   |
| -5.7764973968346611 | 11.8594087923137561 | 21.0602711131134974 | H9   |
| 8.0859205747875578  | 10.5194286654258971 | 19.9837801649950570 | H10  |
| -5.2143497069369529 | 10.2245295463714179 | 21.3379179683090001 | H11  |
| 13.4346580875536805 | 1.1104509266496287  | 22.7995793428278368 | H12  |
| 4.9050839884244759  | 11.5189165023341555 | 22.3483330948386332 | H13  |
| 4.7264212594389132  | 10.6304948819802245 | 20.0386828238579540 | H14  |
| 5.8063896637161960  | 11.8504706988393753 | 18.1447818151259241 | H15  |
| -0.1209849719448557 | 1.4247030501991451  | 18.5929242554712530 | H16  |
| 0.0595464463550652  | 2.3299248444754839  | 20.9094370688130091 | H17  |
| 8.3318902665496637  | 10.8081886876719864 | 21.0096134289348555 | C1   |
| 7.2908022067600688  | 10.4817946247361906 | 21.9838392873005404 | C2   |
| 7.4922742420557951  | 10.6966725669613201 | 23.4180437566776689 | C3   |
| 13.3703847049115616 | 0.7121282874593017  | 21.7857239012173274 | C4   |
| 5.4709808849966644  | 11.9983769345512492 | 21.5475564365924015 | C5   |
| 5.3117405536395967  | 11.5324464825432216 | 20.2226919034719579 | C6   |
| 5.9048509793862927  | 12.2186588641020109 | 19.1673025464397355 | C7   |
| 13.8439597105444570 | 0.8911285080966542  | 19.4224134871278693 | C8   |
| -0.4762990488385568 | 1.3962895317457418  | 20.7281114945003040 | C9   |

| Protonated cumene adsorption |                     |                     |     |
|------------------------------|---------------------|---------------------|-----|
| 6.9879515592985610           | 4.0946827151858152  | 1.0834513517763813  | O1  |
| -0.0851952159036173          | 8.1841374422372066  | 1.1032859539262605  | O2  |
| 5.7386721083988803           | 3.3707698767160337  | 3.2469209835747290  | O3  |
| 1.2296865504215528           | 8.9621531324873711  | 24.0789310361350850 | O4  |
| 8.4198016290317685           | 3.3380589623505412  | 3.2315895958724337  | O5  |
| -1.4050050068354323          | 9.1066455055333293  | 24.1067110613555577 | O6  |
| 7.1247642349023153           | 5.6625391070320026  | 3.2677095767393287  | O7  |
| -0.2193148963123059          | 6.7002139919172023  | 24.1336436616172954 | O8  |
| 1.0716807881201298           | 9.2513901974859607  | 3.2909768718239008  | O9  |
| 5.8545730099426248           | 3.0511252859468057  | 24.1436137587098720 | O10 |
| -1.5583790538868540          | 8.8662268825343808  | 3.2515662679028607  | O11 |
| 8.4655378695895518           | 3.4607298208931052  | 24.1332298732770383 | O12 |
| 0.0921587725560360           | 6.7594038904913818  | 3.2776383676856149  | O13 |
| 6.7727936460086191           | 5.5684401977367228  | 24.2387614906338698 | O14 |
| 4.8572444583980543           | 1.2195625920680233  | 4.5493390067232884  | O15 |
| 1.9275732941794548           | 11.2080142793614463 | 22.8149616615068425 | O16 |
| 10.7212066425222723          | 3.6411899309619438  | 4.5488832682502549  | O17 |
| -3.6884737536578447          | 8.7788868217443135  | 22.7821349760707470 | O18 |
| 5.6837340731293891           | 7.4951317938418462  | 4.5710746720743547  | O19 |
| 1.3093749914887356           | 4.9664949787763311  | 22.8078781503427130 | O20 |
| 2.3007959033750982           | 11.1690657380095342 | 4.6630735360567277  | O21 |
| 4.5035855496968962           | 1.2666261189547354  | 22.7203818503924353 | O22 |
| -3.8336556206992110          | 8.9477539935350929  | 4.6330166980456244  | O23 |
| 10.7746972962030139          | 3.4581566659682150  | 22.7883006451200956 | O24 |
| 1.1465729577471220           | 4.7449734252047708  | 4.6620787999577225  | O25 |
| 5.7985732529309972           | 7.8876343411289263  | 22.7486183928563470 | O26 |
| -1.2988715330564204          | 4.6823176960674218  | 22.7335896037834360 | O27 |
| 8.3177209794110354           | 7.6174556413411745  | 4.6212191306575212  | O28 |
| -2.5201672471963112          | 11.1287463730477185 | 22.8051661544044286 | O29 |
| 9.4877198172190536           | 1.3082677043891584  | 4.5933105213190704  | O30 |
| 3.5075419159468533           | 9.1197079357870763  | 22.7206387046006313 | O31 |
| 3.4488887674993536           | 3.4507615479947211  | 4.6097048539996290  | O32 |
| 8.5649672001896135           | 7.3632103420834545  | 22.9051891972270809 | O33 |
| -1.4815508258953991          | 5.0157634059908700  | 4.5266699526537790  | O34 |
| 9.2671613533147710           | 1.3217207602510586  | 22.7449647608943764 | O35 |
| -2.2957240311168770          | 11.0983568748936410 | 4.4983782611291732  | O36 |
| 3.6309498792681012           | 3.7654560080131314  | 22.8490966236689381 | O37 |
| 3.3821763872487765           | 8.7580022541015516  | 4.5296019820140767  | O38 |
| 5.7692433669800742           | 3.3174319474739939  | 5.9156609427461380  | O39 |
| 1.2162437484421913           | 9.0444607795562266  | 21.3989117137335256 | O40 |
| 8.4469063116596121           | 3.3815245106850584  | 5.9041559601854026  | O41 |
| -1.4351286136700852          | 9.1231419170530224  | 21.4175807600346744 | O42 |
| 7.0534134019409702           | 5.6663630483031371  | 5.9399161909296341  | O43 |

---

|                     |                     |                     |     |
|---------------------|---------------------|---------------------|-----|
| -0.1776785902112428 | 6.7490431291925921  | 21.4680006624631368 | O44 |
| 1.1565106411596391  | 9.1498710422486269  | 5.9611184567481041  | O45 |
| 5.8395444265372998  | 3.1432687642695396  | 21.4478896361751197 | O46 |
| -1.5134410385549910 | 8.9742114892690292  | 5.9247715127222547  | O47 |
| 8.4834385057488788  | 3.5137652440563740  | 21.4357942040781673 | O48 |
| -0.0245911411121509 | 6.7522291493949114  | 5.9480862861021109  | O49 |
| 6.8298402870429555  | 5.6429532263803992  | 21.3827134009767121 | O50 |
| 7.1055792829688320  | 4.0808911648774409  | 8.0411909111306308  | O51 |
| -0.1452717994810797 | 8.2337847915580546  | 19.3002816686653453 | O52 |
| -0.1630050417188524 | 8.2986131738249078  | 8.0759853543273454  | O53 |
| 7.0614566411980295  | 3.9996162386207610  | 19.2978610135348951 | O54 |
| -1.7297567279416617 | 12.3746741481873492 | 6.7581617370147136  | O55 |
| 8.6106355509990316  | -0.0251250104162437 | 20.5504174585414461 | O56 |
| 11.5432862725390226 | 4.8564994106432930  | 6.7733354777213215  | O57 |
| 9.9257268089567479  | 7.5135875698998076  | 20.6111470064011009 | O58 |
| 4.2171030995259065  | 7.6387669315527136  | 6.7882709222394109  | O59 |
| 2.8040604717942825  | 4.9416700923464960  | 20.6176300283209599 | O60 |
| 8.8538405216205422  | 0.0458465993727734  | 6.8413732801782716  | O61 |
| -2.0512587867903518 | 12.3928593100235158 | 20.5380106713466581 | O62 |
| 9.7672768896114235  | 7.7224995404782915  | 6.8416962700944843  | O63 |
| 11.6405406353049123 | 4.5354151486625556  | 20.5505837308438188 | O64 |
| 2.6431288125254753  | 4.6130405137072561  | 6.8552081201910848  | O65 |
| 4.2857511425711170  | 7.8642707446748910  | 20.5444958488757621 | O66 |
| 7.1986766468585284  | -0.0337242568900677 | 4.7491111979031100  | O67 |
| 6.8941704774826738  | 0.1039757588498618  | 22.5635618942061704 | O68 |
| 10.6184986974054603 | 6.2917768507784979  | 4.7570244228778220  | O69 |
| -3.4893868901813492 | 6.1342193370930573  | 22.5965530111082522 | O70 |
| 3.4270086306715557  | 6.1033036269383523  | 4.7856752391606010  | O71 |
| 3.5097402917184897  | 6.4477719091554642  | 22.6675261336439569 | O72 |
| 7.1271630042040552  | -0.0480840054694082 | 8.8583597814437933  | O73 |
| -0.3410400103541393 | 12.4314925195214698 | 18.5013646883309448 | O74 |
| 10.6551733984804340 | 6.2507533575794962  | 8.8665170033949803  | O75 |
| 10.7610012480482702 | 6.0432901356626152  | 18.5306323955387242 | O76 |
| 3.4546671871141976  | 6.1482035586211312  | 8.8659932716940197  | O77 |
| 3.5375345459834162  | 6.3576073659557641  | 18.4750499949098419 | O78 |
| 4.7087045214728631  | 1.0923741329788166  | 8.9413420476010099  | O79 |
| 2.0000234403779578  | 11.1635203698457222 | 18.3821057988394720 | O80 |
| 10.8667834859035324 | 3.5851235521313560  | 8.9574391933926805  | O81 |
| -3.7419189913355595 | 8.7048456185862584  | 18.4266692907065490 | O82 |
| 5.6351026780597504  | 7.6904016791327248  | 8.9903497590055110  | O83 |
| 1.2525252672121923  | 4.9824269783085491  | 18.5131453598030191 | O84 |
| 2.3090833785682481  | 11.2809118882743125 | 9.0606623389507455  | O85 |
| 4.5404092202828643  | 1.2344918343155817  | 18.3512525524136301 | O86 |
| -3.9866255444403298 | 8.9128467000121496  | 9.0914095217668329  | O87 |

---

---

|                     |                     |                     |      |
|---------------------|---------------------|---------------------|------|
| 10.7906077683257280 | 3.3657940157467086  | 18.3527384295604996 | O88  |
| 1.2318542203787048  | 4.6737517865807279  | 9.0838978167924846  | O89  |
| 5.8272648977700019  | 7.7712205608034157  | 18.3968013365306184 | O90  |
| -1.3704752813758623 | 4.6771607637734487  | 18.3482447479022674 | O91  |
| 8.2665591710292716  | 7.4248519707625826  | 8.9862745663035692  | O92  |
| -2.6564145266251429 | 11.1065195128977052 | 18.3345623094286729 | O93  |
| 9.3509143033352107  | 1.4148083389652888  | 9.0315686628591205  | O94  |
| 3.5453246108511358  | 9.0320636408811943  | 18.3188016162752518 | O95  |
| 3.5960460416375755  | 3.4934417096250092  | 9.0350332289202999  | O96  |
| 8.4280376610258294  | 7.3342221898653630  | 18.4738117406312128 | O97  |
| -1.3783542504152018 | 5.0945825531236943  | 8.8914948883466192  | O98  |
| 9.1577353778378150  | 1.3092461966804518  | 18.3778193862676780 | O99  |
| -2.2916458004427858 | 10.9443080609672609 | 8.8668276423458217  | O100 |
| 3.5859998437177700  | 3.6965995135260377  | 18.4643558122092166 | O101 |
| 3.2254540596568804  | 8.7999640498742426  | 8.9099145124976324  | O102 |
| 5.9575793574480764  | 3.0687347069936131  | 10.2078228149547705 | O103 |
| 1.1789873272541724  | 8.9579649766963634  | 17.1071465185021339 | O104 |
| 8.5323379509600237  | 3.6494094981119121  | 10.2353775566647087 | O105 |
| -1.4392009905623904 | 9.0649850434251391  | 17.1314435728549022 | O106 |
| 6.7391942395866451  | 5.5884751927642453  | 10.1861451327470860 | O107 |
| -0.2144629268857496 | 6.7276474562012218  | 17.1156604520657005 | O108 |
| 0.9803861302054795  | 9.3127828582261056  | 10.2491328747970822 | O109 |
| 5.8243858656175629  | 3.1976979374018510  | 17.0900713851244781 | O110 |
| -1.6060146032085285 | 8.7799162781283080  | 10.2555868585776402 | O111 |
| 8.4428250983260842  | 3.5475619236301914  | 17.0828883586172289 | O112 |
| 0.1515212453347123  | 6.8042207786449662  | 10.2471755991725519 | O113 |
| 6.8306298192297241  | 5.6285774695776807  | 17.1783548700605522 | O114 |
| 3.8238798115260604  | 2.0148960667488489  | 11.2500905208351618 | O115 |
| 3.0789459828050019  | 10.4193928712651722 | 16.0941268897274483 | O116 |
| 10.5264891413142756 | 2.3285007632032935  | 11.2536532677062375 | O117 |
| -3.6489383418140529 | 9.9824799869750578  | 16.1269963931611429 | O118 |
| 6.9600052344875456  | 7.9301744731697994  | 11.2669216974925259 | O119 |
| 0.1709456365383377  | 4.3198957940404297  | 16.2003215002526630 | O120 |
| 3.2781519595875190  | 10.0692592710235616 | 11.2357891915015919 | O121 |
| 3.5080150162588399  | 2.3930977249879652  | 16.1824137271742536 | O122 |
| -3.4130064988549091 | 10.4256467671911501 | 11.2081110138092122 | O123 |
| 10.3017360251364458 | 1.9975046352741788  | 16.1109001652123816 | O124 |
| -0.3324196457729913 | 4.4327155679919787  | 11.2319278388931156 | O125 |
| 7.3003839522210940  | 8.0101341825969836  | 16.1861109968121291 | O126 |
| -5.0006141884028175 | 12.4649798832308374 | 11.8414819013725037 | O127 |
| 11.9326554422007458 | -0.0482334217597045 | 15.5943536122955102 | O128 |
| 13.1167130806222296 | 2.0419701149966230  | 11.8439926641977795 | O129 |
| 8.2356791081626692  | 10.4171334214996207 | 15.4971295087507279 | O130 |
| 5.8653481811053227  | 10.3031067816332200 | 11.7944192423992913 | O131 |

---

---

|                     |                     |                     |      |
|---------------------|---------------------|---------------------|------|
| 0.9903242169716751  | 1.9056102537039070  | 15.4395905823168018 | O132 |
| 4.3416367420232573  | 12.4419341183109982 | 11.6648559544141950 | O133 |
| -4.5156006224111866 | 12.4308768317899823 | 15.6874010317470418 | O134 |
| 8.4705084289287509  | 10.0181385250823194 | 11.7609302552730206 | O135 |
| 12.8584441779667280 | 2.4149463724661602  | 15.6669433077418905 | O136 |
| 1.2829329929327209  | 2.4229571687137921  | 11.7837165822288554 | O137 |
| 5.6487638394853086  | 10.0017902324912633 | 15.6854003327571014 | O138 |
| 3.0034107668400374  | 1.7060172161717631  | 13.7063780638480512 | O139 |
| 4.0222634139531070  | 10.7122753179433268 | 13.6729890006214791 | O140 |
| 11.2193186940808154 | 1.6663088948246800  | 13.6811294397439820 | O141 |
| -4.2459343361424651 | 10.6838230316520288 | 13.6826033061318437 | O142 |
| 7.0364761399264202  | 8.8516096012460608  | 13.7077644882450169 | O143 |
| -0.1739614760795003 | 3.5751093359068258  | 13.7071095250681587 | O144 |
| -0.1118094580913445 | 8.1689684203304846  | 26.2771389968192750 | O145 |
| 7.1050162032288711  | 3.8934804041122755  | 26.3406112857531873 | O146 |
| 4.9549633984723691  | 2.8409320040697752  | 4.5714020338088037  | Si1  |
| 1.9570796067324761  | 9.5833477890598804  | 22.7618496015820533 | Si2  |
| 9.2661125030108060  | 2.9189624599012194  | 4.5598510441029036  | Si3  |
| -2.2564369107341307 | 9.5211559532223884  | 22.7830469384052421 | Si4  |
| 7.0436800768077843  | 6.6070801115214026  | 4.5925473411283306  | Si5  |
| -0.0936446678561387 | 5.7793364769187834  | 22.7950577715695495 | Si6  |
| 1.9806723107740618  | 9.5749018076614174  | 4.6047405345689674  | Si7  |
| 4.9696875405699092  | 2.8391285071352850  | 22.8040214322354196 | Si8  |
| -2.2957012703268282 | 9.4757250301787739  | 4.5713415235323902  | Si9  |
| 9.2110096357288267  | 2.9587343189950892  | 22.7917544340402891 | Si10 |
| -0.0727034187646614 | 5.8189691851485126  | 4.5969162749385015  | Si11 |
| 4.5104466339474314  | 2.4267311663431061  | 9.8451575667442306  | Si12 |
| 2.4478233170903669  | 9.8866952385085138  | 17.4891120995286293 | Si13 |
| 9.8179106030755836  | 2.7310622370600286  | 9.8556121780377683  | Si14 |
| -2.8692382327629766 | 9.7197831134449242  | 17.5219126260732381 | Si15 |
| 6.9130232670779490  | 7.1650021418273599  | 9.8425565846825176  | Si16 |
| -0.0434812645621645 | 5.1754664194435138  | 17.5597580821399788 | Si17 |
| 2.4555289675781893  | 9.8702939394494713  | 9.8531279035045145  | Si18 |
| 4.3701289783214285  | 2.6275771941029600  | 17.5355607367042055 | Si19 |
| -2.8310822136312930 | 9.7691549176442809  | 9.8462857124281271  | Si20 |
| 9.6664712331063711  | 2.5672912409938182  | 17.4894659442309965 | Si21 |
| -0.0804081710243891 | 5.2438686097439211  | 9.8523502395152711  | Si22 |
| 7.0963384260922693  | 7.1789117009312635  | 17.5680827330550819 | Si23 |
| 2.5784659468670115  | 1.5214928263634777  | 12.1485528143368171 | Si24 |
| 4.3675058201389181  | 10.8971103997865075 | 15.2465032787024501 | Si25 |
| 11.6106244419954940 | 1.4989254225159270  | 12.1135214636231083 | Si26 |
| -4.6567213329350903 | 10.8774957515024653 | 15.2426255994747173 | Si27 |
| 7.0793743806035607  | 9.2812032979362531  | 12.1400446624848790 | Si28 |
| -0.1435540118611847 | 3.0561452802906248  | 15.2492521574539328 | Si29 |

---



---

|                     |                     |                     |      |
|---------------------|---------------------|---------------------|------|
| 4.3796774847815811  | 10.8806420090734122 | 12.0967138687110154 | Si30 |
| 2.5524016984067130  | 1.4869059355012657  | 15.2526488076189128 | Si31 |
| -4.6567422562427616 | 10.9011995017816830 | 12.1255122655797809 | Si32 |
| 11.5793865274151084 | 1.5072966344749885  | 15.2545431230525548 | Si33 |
| -0.1349869955845127 | 3.1153818404695395  | 12.1465930591857614 | Si34 |
| 7.0608886829750768  | 9.3151270900329131  | 15.2651673404081158 | Si35 |
| -1.5974829344453658 | 12.4143464787767783 | 5.1496369392497723  | Si36 |
| 8.4665482150728266  | 0.0356178250088076  | 22.1641340144818741 | Si37 |
| 11.4586278667269870 | 4.9548014324632783  | 5.1632912880994892  | Si38 |
| 9.9992706536263363  | 7.4235393528804048  | 22.2382757227730963 | Si39 |
| 4.1751293728266647  | 7.4958307242490090  | 5.1790841865535864  | Si40 |
| 2.8325002973658018  | 5.0332898136067499  | 22.2337379393133396 | Si41 |
| 8.7591063103335571  | -0.0027244657862450 | 5.2259461321260536  | Si42 |
| 5.3233013713237884  | -0.0168825274626054 | 22.1489068700826977 | Si43 |
| 9.8287039185004055  | 7.6405362514548560  | 5.2264550496463693  | Si44 |
| 11.6026666667841862 | 4.7197456481375513  | 22.1647105697361937 | Si45 |
| 2.6694320541575873  | 4.7326740050392617  | 5.2408887834961035  | Si46 |
| 4.3055760594821599  | 7.7909398501397344  | 22.1767636873545442 | Si47 |
| -1.6449546280177083 | 12.3446728162978658 | 8.3699082996468963  | Si48 |
| 8.4427089753682658  | -0.0286709747269208 | 18.9445946082689289 | Si49 |
| 11.5227146484902470 | 4.9529349307123098  | 8.3851389663212981  | Si50 |
| 9.9559849731033445  | 7.3853740322557382  | 19.0126743185627127 | Si51 |
| 4.1314240190871887  | 7.5585255809253651  | 8.3988764930914108  | Si52 |
| 2.7975133131463608  | 4.9993347020222707  | 19.0097008247522226 | Si53 |
| 8.7074238010713287  | 0.0453067110210406  | 8.4531317346435308  | Si54 |
| -1.9194602446383140 | 12.4230260419182841 | 18.9295881197907967 | Si55 |
| 9.7895520396625155  | 7.5730805125600167  | 8.4523001238286213  | Si56 |
| 11.5529979576913497 | 4.6780440210609608  | 18.9446524955127842 | Si57 |
| 2.7316822201479320  | 4.7397098581088839  | 8.4656239653120302  | Si58 |
| 4.2919367731290476  | 7.7284262188929036  | 18.9413892821405234 | Si59 |
| 7.0794327207223668  | 4.1236143904883322  | 2.7052045267453622  | Si60 |
| -0.1262411934559946 | 8.2432165418463139  | 24.6540928506201276 | Si61 |
| -0.1210820671115478 | 8.2787303697110843  | 2.7245377466066771  | Si62 |
| 7.0357335893763056  | 4.0594617768795871  | 24.7134355352665267 | Si63 |
| 7.0926426854754379  | 4.1133747701558354  | 6.4387578546271795  | Si64 |
| -0.1369203090916047 | 8.2796103095893461  | 20.9083007412222379 | Si65 |
| -0.1356211981629398 | 8.2933599510422908  | 6.4711342168989470  | Si66 |
| 7.0436147184496356  | 4.1315109866130904  | 20.9184069016094938 | Si67 |
| 7.0838007271557997  | 4.0967479805076605  | 9.6651402437097911  | Si68 |
| -0.1576404976555370 | 8.2448543594062560  | 17.6764664868864969 | Si69 |
| -0.1597234781030989 | 8.2984977751439111  | 9.7024023647500464  | Si70 |
| 7.0366421707727893  | 4.1003277245579621  | 17.6877314793221068 | Si71 |
| 7.0058769827983012  | 6.6029073472889577  | 22.8534084334182168 | All  |
| 7.6875249478979644  | 4.5275713914873110  | 0.5711139254758107  | H1   |

---

|                     |                     |                     |     |
|---------------------|---------------------|---------------------|-----|
| -0.1185388695599263 | 9.0049627019017233  | 0.5890228086432534  | H2  |
| -0.0917365656308577 | 8.9981749938834028  | 26.7785360138273099 | H3  |
| 6.8096922102017299  | 4.6633015501980957  | 26.8497995358477439 | H4  |
| 7.4006736070441006  | 10.0630062037508257 | 24.1548867955613069 | H5  |
| 8.1083582956622653  | 9.6813621891065313  | 21.7722882024447379 | H6  |
| -6.4630599010587479 | 11.7622952266190577 | 24.0350256097879260 | H7  |
| -5.3248832052789448 | 10.4122915985747735 | 23.8525291058396114 | H8  |
| 1.3168910125817876  | 0.2448798662477656  | 21.6820869007900754 | H9  |
| -5.7966078737934845 | 11.6330137214334108 | 20.2862357000519431 | H10 |
| -4.6316961724154231 | 11.5080293107740790 | 21.6187573145340011 | H11 |
| 5.7983818652785528  | 12.2106093994744249 | 23.3996537353506397 | H12 |
| 5.9593188536507151  | 9.9576865895064106  | 22.2683227922785321 | H13 |
| 6.5151909974539288  | 9.7883333461394670  | 19.8510704685044068 | H14 |
| 5.3459107270536670  | 11.5012561955092139 | 18.4653084173052910 | H15 |
| 11.6968448168968990 | 1.0687150947729689  | 19.5510202222845137 | H16 |
| 11.8617546339359823 | 1.4057973492593840  | 21.9992940223037046 | H17 |
| -5.6820282729490721 | 11.7105069384253611 | 21.3768725923585201 | C1  |
| 7.8896926062131554  | 10.7001351565888534 | 22.1246594192903174 | C2  |
| 8.0855947431727344  | 10.7455153644417436 | 23.6319181678225974 | C3  |
| 5.7127679112398200  | 12.0668881274813113 | 22.3212702941924732 | C4  |
| 6.3148958022483157  | 10.8836501091602269 | 21.7335057904935951 | C5  |
| 6.1130466387772540  | 10.6972747062515197 | 20.3063870733224690 | C6  |
| 5.4678836909667421  | 11.6416416599091566 | 19.5398559527561311 | C7  |
| 12.1876923881395971 | 0.3043812772655716  | 20.1597494681647333 | C8  |
| 12.2896829481637955 | 0.5104532437012430  | 21.5480959555967999 | C9  |
| Adsorbed cumene     |                     |                     |     |
| 7.0810877407398971  | 4.2050524042782644  | 0.9719805242461481  | O1  |
| -0.0094361584553040 | 8.3142611636283057  | 1.0016643235005942  | O2  |
| 5.7979490658333690  | 3.5473298077915683  | 3.1394275968543597  | O3  |
| 1.3333114867522911  | 9.0362635774174827  | 24.0422566008238903 | O4  |
| 8.4737285980912969  | 3.4131161149468205  | 3.1336034117722242  | O5  |
| -1.2957950731090859 | 9.2964749239137934  | 24.0457563097673699 | O6  |
| 7.2697107962953389  | 5.7880745114637229  | 3.1400998012733763  | O7  |
| -0.1978559838514213 | 6.8412201217229232  | 24.0510704713100338 | O8  |
| 1.1687917092345996  | 9.3433674511324032  | 3.1951938903153065  | O9  |
| 5.8776846939673710  | 3.2298622773963990  | 24.0506337783757758 | O10 |
| -1.4680980466277345 | 9.0142381120348372  | 3.1525675111517777  | O11 |
| 8.5295577030879475  | 3.4662664232434950  | 24.0776046355470541 | O12 |
| 0.1370650266633566  | 6.8697818469022884  | 3.1652702092199765  | O13 |
| 6.9606266839371118  | 5.6548326698327864  | 24.2612216172110529 | O14 |
| 4.9723660918992145  | 1.3608732150879703  | 4.4199000879699932  | O15 |
| 1.9999076448708859  | 11.2785488338640416 | 22.7584519094821118 | O16 |
| 10.7759732688600316 | 3.7737445338419726  | 4.4267234185126236  | O17 |
| -3.5757095983516045 | 8.8512355384920216  | 22.7538988553400969 | O18 |

---

|                     |                     |                     |     |
|---------------------|---------------------|---------------------|-----|
| 5.7805032922503186  | 7.5945171862932144  | 4.4247137344325633  | O19 |
| 1.4022732533308040  | 5.1638924488844555  | 22.7575202929744442 | O20 |
| 2.3879007662930860  | 11.2751324520141658 | 4.5589249624342978  | O21 |
| 4.5790146345355565  | 1.3669941745059899  | 22.6738365381203693 | O22 |
| -3.7330971219778220 | 9.0798825752693091  | 4.5524595001794257  | O23 |
| 10.8382728681811837 | 3.5562501952232131  | 22.7414602572413571 | O24 |
| 1.2242209149402119  | 4.8715340145259320  | 4.5480570940144878  | O25 |
| 5.8891557412581497  | 7.9522024883523086  | 22.8474736216272341 | O26 |
| -1.2142046873759453 | 4.7714266352623298  | 22.6888341297584795 | O27 |
| 8.4181571309262999  | 7.7513332709644747  | 4.5197794713514039  | O28 |
| -2.5017382639531056 | 11.2413298705564557 | 22.6979773120095700 | O29 |
| 9.5816012638718391  | 1.4167033779395959  | 4.5078717576049225  | O30 |
| 3.5904225211148963  | 9.1775577296776660  | 22.6768189021621644 | O31 |
| 3.5195315217915546  | 3.5662844324526892  | 4.5194393678861520  | O32 |
| 8.6675004802071847  | 7.4495267547272759  | 22.7587144890541637 | O33 |
| -1.4060649189994059 | 5.1131351159099561  | 4.4372794394341648  | O34 |
| 9.3348411993901514  | 1.3975103373851454  | 22.6114721637784974 | O35 |
| -2.2135203190053847 | 11.2387119038447718 | 4.4115650643591016  | O36 |
| 3.6643013599342780  | 3.8444464479952969  | 22.7082881389745417 | O37 |
| 3.4901179319647513  | 8.8755040593090797  | 4.4192346438945336  | O38 |
| 5.8446093259585332  | 3.4595596477282777  | 5.8120041476417672  | O39 |
| 1.3201555525957014  | 9.0764205735932109  | 21.3554320459815727 | O40 |
| 8.5184598275517693  | 3.4831360039304124  | 5.8095945520690746  | O41 |
| -1.3298515219494371 | 9.2580478219540066  | 21.3659427420672543 | O42 |
| 7.1598535911546932  | 5.7889176443360189  | 5.8138564216635276  | O43 |
| -0.1550905825920785 | 6.8444265136407623  | 21.3822888511583891 | O44 |
| 1.2724428646371475  | 9.2432080266587242  | 5.8659721739982436  | O45 |
| 5.9035257573004465  | 3.2125909103494821  | 21.3524866869685468 | O46 |
| -1.4007044955053574 | 9.1226093493684886  | 5.8273614187649532  | O47 |
| 8.5386805643077395  | 3.6614922944918780  | 21.4032847078238895 | O48 |
| 0.0403761496569559  | 6.8700251997650277  | 5.8384114936101739  | O49 |
| 6.7992125758144972  | 5.7215782397540531  | 21.3812346443841719 | O50 |
| 7.1798486751276416  | 4.2419504138621438  | 7.9392949733754872  | O51 |
| -0.0662526063198072 | 8.3595849633255970  | 19.2312380263893132 | O52 |
| -0.0594239134487715 | 8.4038755301314509  | 7.9749728385858765  | O53 |
| 7.1440219932383373  | 4.1704612937726671  | 19.2383834730500745 | O54 |
| 5.5430682657509900  | 0.0505664216208460  | 6.6618506998983591  | O55 |
| 1.3940045169083746  | 12.4711853416805045 | 20.4831939802968925 | O56 |
| -2.8366377674753878 | 4.9338045166013966  | 6.6749641457038029  | O57 |
| -4.3222471488997423 | 7.6674288703711229  | 20.5114548690603620 | O58 |
| 4.3500401325180338  | 7.7393028691504995  | 6.6638691040520284  | O59 |
| 2.8012649247215506  | 5.0843048793196992  | 20.5084745748073658 | O60 |
| 8.9700019739966823  | 0.1277199282711304  | 6.7528410290695868  | O61 |
| 5.2738738662243767  | 0.0510780855232523  | 20.4647972370650670 | O62 |

---

---

|                     |                     |                     |      |
|---------------------|---------------------|---------------------|------|
| 9.8578802473764675  | 7.8549152160107658  | 6.7526486649792172  | O63  |
| 11.7389656744630440 | 4.6048160885278229  | 20.4922069379389349 | O64  |
| 2.7000649898958260  | 4.7644582415797050  | 6.7488710981749307  | O65  |
| 4.6055984523787270  | 7.9994728896354026  | 20.5043286487566867 | O66  |
| 7.2915935557684017  | 0.0792156756985574  | 4.6763571664271169  | O67  |
| 6.9564778585783813  | 0.1680240918386049  | 22.5371432931625577 | O68  |
| 10.7179375365684315 | 6.4239804441829804  | 4.6723637474174025  | O69  |
| -3.4059302130843463 | 6.2148366070649059  | 22.5103779301720159 | O70  |
| 3.5131031804069210  | 6.2209052137264313  | 4.6666980463021099  | O71  |
| 3.6983807567743066  | 6.5014918478574284  | 22.5436411855599559 | O72  |
| 7.2105441059133719  | 0.0785122020350865  | 8.7441985891219378  | O73  |
| 6.9523568620392142  | 0.0967265195023203  | 18.4009742919737533 | O74  |
| 10.7582392123244794 | 6.3656013186370028  | 8.7610517091155753  | O75  |
| -3.5191534731463556 | 6.1375096513355949  | 18.4710186472085667 | O76  |
| 3.5316062500483145  | 6.2979589700418446  | 8.7526034137793385  | O77  |
| 3.6949537655825844  | 6.5346449783111078  | 18.4689451649923519 | O78  |
| 4.7904776674144482  | 1.2138803242741112  | 8.8824090900671013  | O79  |
| 2.0292173121250352  | 11.2516898358701614 | 18.2747866281422802 | O80  |
| 10.9826127705666927 | 3.7019538739286380  | 8.9043026492289901  | O81  |
| -3.5310932306050375 | 8.7893612041736784  | 18.2886827738281781 | O82  |
| 5.7326049243858961  | 7.8167824806790316  | 8.8838645334735382  | O83  |
| 1.3907765657037010  | 5.2107998682967755  | 18.3154267964036848 | O84  |
| 2.3953546601990370  | 11.4255205762874006 | 9.0151755992237472  | O85  |
| 4.6183950631582009  | 1.3971857140051851  | 18.2878924578588489 | O86  |
| -3.8816804559640143 | 9.0237266014273363  | 9.0128955206561212  | O87  |
| 10.9244139651459875 | 3.4697112221278301  | 18.2647918371610558 | O88  |
| 1.3380243848989357  | 4.7866276404012487  | 9.0125158974644286  | O89  |
| 5.9957702943641094  | 7.8936769944044629  | 18.2783266085156662 | O90  |
| -1.2208596866471979 | 4.7705846227381006  | 18.3248922552552855 | O91  |
| 8.3678130298892448  | 7.5407412323638443  | 8.8971904970560480  | O92  |
| -2.5838765618434314 | 11.2611837460453401 | 18.2750919055065388 | O93  |
| 9.4233147509900235  | 1.5581440236410729  | 8.9108972011659926  | O94  |
| 3.7047954000304610  | 9.2075191364345148  | 18.3567275635334290 | O95  |
| 3.7155933916385129  | 3.6402733417805582  | 8.8971911572772360  | O96  |
| 8.6037215204084312  | 7.4600195435262009  | 18.3823752131920450 | O97  |
| -1.2709063641527918 | 5.2081336109881198  | 8.7544954958246883  | O98  |
| 9.2745009321829972  | 1.4102780994396547  | 18.3984428856136049 | O99  |
| -2.2048161098380401 | 11.0677156920484592 | 8.7466893423245740  | O100 |
| 3.6927825301371366  | 3.8713372169290103  | 18.3712436940278643 | O101 |
| 3.3388739456407190  | 8.9579605719603155  | 8.7495000671399374  | O102 |
| 6.0523533771360478  | 3.2046700584729755  | 10.1068127772998722 | O103 |
| 1.3843146687895889  | 8.9552968405716307  | 17.0846432748589301 | O104 |
| 8.6241240150325247  | 3.7952424435788545  | 10.1229860802245213 | O105 |
| -1.2318441097991313 | 9.3284923519253056  | 17.0489492650579599 | O106 |

---

|                     |                     |                     |      |
|---------------------|---------------------|---------------------|------|
| 6.8265917254650654  | 5.7278090158321140  | 10.1084695632537702 | O107 |
| -0.2404137262567136 | 6.8774862260189007  | 17.0320799765891060 | O108 |
| 1.1116755168011379  | 9.3974308543753047  | 10.1446975271586410 | O109 |
| 5.9291947959444347  | 3.3470390316408913  | 17.0218942602654124 | O110 |
| -1.4869929095203007 | 8.9220470999935948  | 10.1526378941992483 | O111 |
| 8.5565862369824472  | 3.6029853742663835  | 17.0563869167330893 | O112 |
| 0.2259707621561584  | 6.9097877299442159  | 10.1539095370910424 | O113 |
| 7.0193398376025229  | 5.7478580501464966  | 17.0885404109443790 | O114 |
| 3.8839679423323061  | 2.2165979737597721  | 11.1506603085673692 | O115 |
| 3.2380713802903713  | 10.4884105055114887 | 16.0612381069943062 | O116 |
| 10.5638680374750109 | 2.4111757542742418  | 11.1717851855158177 | O117 |
| -3.4920493077535193 | 10.1531514775460625 | 16.0295958336012028 | O118 |
| 7.0541901094777195  | 8.0922562701333245  | 11.1565470507109374 | O119 |
| 0.1958432706633313  | 4.4757636626564503  | 16.0836795357660556 | O120 |
| 3.4261315686859932  | 10.1438462616880454 | 11.1177114293605879 | O121 |
| 3.6125314904541717  | 2.5433298005234568  | 16.0971826916571601 | O122 |
| -3.2899829127387603 | 10.5639378880440749 | 11.1078874148140301 | O123 |
| 10.4038034978999772 | 2.0158630465429686  | 16.0915947002885957 | O124 |
| -0.2823213211972408 | 4.5300358348124821  | 11.1186573707821221 | O125 |
| 7.4814573149956365  | 8.1260215693326252  | 16.0834783471596907 | O126 |
| 2.3598383416170270  | 0.1096891582513901  | 11.7607659178159576 | O127 |
| 12.0554800548719516 | 0.0294685014421623  | 15.4322376134997317 | O128 |
| 13.1527189948205923 | 2.1542220572364679  | 11.7722829769215451 | O129 |
| -6.0571452805793049 | 10.5511737501612117 | 15.4200427299995493 | O130 |
| 5.9852755679426881  | 10.4547063307679160 | 11.7777201091145365 | O131 |
| 1.0897826532691759  | 2.0701852054551617  | 15.3682110548237514 | O132 |
| 11.6045915332874632 | 0.0402697693971740  | 11.6466664470347521 | O133 |
| 2.8154681425032071  | 0.0883155722801733  | 15.5600588723764499 | O134 |
| -5.8450292966652064 | 10.1759375658201083 | 11.6362464006418538 | O135 |
| 12.9422782288520732 | 2.5094562809939140  | 15.5687055611001792 | O136 |
| 1.3247552212546398  | 2.5170673694613805  | 11.6764216278159232 | O137 |
| 5.7882451261376842  | 10.0793607838362718 | 15.5461835956336767 | O138 |
| 3.0786039074327816  | 1.9004215402332054  | 13.6093575720296140 | O139 |
| 4.0668066564001411  | 10.7402910247397596 | 13.5989394661665006 | O140 |
| 11.2514365998050216 | 1.8129244374073117  | 13.6196650186864332 | O141 |
| -4.1269444859413023 | 10.8048992415821061 | 13.5834982047287909 | O142 |
| 7.2447157074666491  | 8.9604839794318600  | 13.6070931713684562 | O143 |
| -0.1045963431902384 | 3.6907701399559980  | 13.6055478762760327 | O144 |
| -0.0646556606463662 | 8.2837279754115833  | 26.2173537483748795 | O145 |
| 7.2139887511802145  | 3.8667273600941323  | 26.2864666667230722 | O146 |
| 5.0361495081733354  | 2.9832949242086593  | 4.4638811299121439  | Si1  |
| 2.0297365390188871  | 9.6591909642722378  | 22.7119019693753437 | Si2  |
| 9.3351953134393550  | 3.0239263312666393  | 4.4617256629181794  | Si3  |
| -2.1752679921521305 | 9.6499754470648842  | 22.7184398756738588 | Si4  |

---

|                     |                     |                     |      |
|---------------------|---------------------|---------------------|------|
| 7.1541803062771070  | 6.7281102147322089  | 4.4670785984113142  | Si5  |
| -0.0444738940349954 | 5.9028483953952211  | 22.7266092881267987 | Si6  |
| 2.0810025952819995  | 9.6784958707927906  | 4.5037445920752033  | Si7  |
| 5.0195287801037320  | 2.9407040176340802  | 22.7077762025986374 | Si8  |
| -2.1990293361898643 | 9.6160051654641840  | 4.4800428194207855  | Si9  |
| 9.2931732203596944  | 3.0279364683050543  | 22.7158283843687840 | Si10 |
| -0.0059355015701352 | 5.9326955499460858  | 4.4907225717959198  | Si11 |
| 4.5984393849635152  | 2.5760501043811468  | 9.7457755635253704  | Si12 |
| 2.5920490890542167  | 9.9773546167918514  | 17.4531530399879067 | Si13 |
| 9.8985166055936755  | 2.8531160314059019  | 9.7649229547932315  | Si14 |
| -2.7136329298295192 | 9.8850141711279171  | 17.4239334536315909 | Si15 |
| 7.0068973730683242  | 7.3013758030877431  | 9.7475118500526747  | Si16 |
| 0.0251791462549185  | 5.3277366889170672  | 17.4494135553505743 | Si17 |
| 2.5740026297568086  | 9.9860635409963727  | 9.7471012072049490  | Si18 |
| 4.4681070701048542  | 2.7820498478355469  | 17.4527664564034097 | Si19 |
| -2.7232270722311163 | 9.8965995002956291  | 9.7447038897086440  | Si20 |
| 9.7927265338193781  | 2.6305894684196951  | 17.4620766266566392 | Si21 |
| 0.0042352006932944  | 5.3503360768357595  | 9.7500879912128848  | Si22 |
| 7.2776419340333032  | 7.3051269912554995  | 17.4675815660076879 | Si23 |
| 2.6594211401740298  | 1.6797193993032236  | 12.0532996142922535 | Si24 |
| 4.4872698238792177  | 10.9643953344159417 | 15.1545714739648520 | Si25 |
| 11.6490761033651893 | 1.6077721358588966  | 12.0569606978484636 | Si26 |
| -4.5243717843143010 | 11.0242688367906165 | 15.1445987364614982 | Si27 |
| 7.2123398579414237  | 9.4263109007055021  | 12.0497000062649828 | Si28 |
| -0.0762530734412181 | 3.1845509879414013  | 15.1522580276045513 | Si29 |
| 4.4677886466126289  | 10.9699583620818277 | 12.0390841036715255 | Si30 |
| 2.6479563901528897  | 1.6510429667314872  | 15.1576698806605563 | Si31 |
| -4.5318193856969895 | 11.0404604479241772 | 12.0271527813594208 | Si32 |
| 11.6649170600969025 | 1.5891219774488210  | 15.1759658437989469 | Si33 |
| -0.0863160892189034 | 3.2205540168372813  | 12.0473970802979711 | Si34 |
| 7.2245777331456340  | 9.4301270732238116  | 15.1634591540282102 | Si35 |
| 5.7064659038641334  | 0.0561520291265214  | 5.0550616107060291  | Si36 |
| 8.5202470209057051  | 0.0967965162673699  | 22.0900463203000754 | Si37 |
| -2.9035232189398479 | 5.0661238133582858  | 5.0658916605924418  | Si38 |
| -4.3050735416945374 | 7.5270038786075197  | 22.1312326337155305 | Si39 |
| 4.2805100643787801  | 7.6049153722659835  | 5.0550789433175272  | Si40 |
| 2.8932798717340935  | 5.1342724063226850  | 22.1176944496105570 | Si41 |
| 8.8562981330908652  | 0.1016313761038436  | 5.1384409221406857  | Si42 |
| 5.3890757928819877  | 0.0877261610608314  | 22.0782252125272862 | Si43 |
| 9.9251171037767723  | 7.7723592354370137  | 5.1379553392063606  | Si44 |
| -2.7441120994647084 | 4.7893556367209245  | 22.1011748519884677 | Si45 |
| 2.7442010661722476  | 4.8597803037239977  | 5.1334420523313486  | Si46 |
| 4.3760353094655446  | 7.8927686631495426  | 22.0858749543638382 | Si47 |
| -1.5672108216168255 | 12.4810864532284054 | 8.2725859269121038  | Si48 |

---

|                     |                     |                     |      |
|---------------------|---------------------|---------------------|------|
| 8.5142119600466497  | 0.0639152288666624  | 18.8735336535811271 | Si49 |
| -2.8160507269439217 | 5.0596646521105244  | 8.2861584252171809  | Si50 |
| -4.2980918040729152 | 7.5054764317255778  | 18.9102404966857165 | Si51 |
| 4.2351157350653299  | 7.6927763214089699  | 8.2747315827789265  | Si52 |
| 2.8977755639395353  | 5.1750023101271534  | 18.8980170443873128 | Si53 |
| 8.7964771838989098  | 0.1683494920583545  | 8.3620061963237422  | Si54 |
| 5.3811257446842085  | 0.0804900204576773  | 18.8525814373487748 | Si55 |
| 9.8898676420968634  | 7.6914775747192170  | 8.3626292827634945  | Si56 |
| -2.7462755526402636 | 4.7600188992266164  | 18.8856057041227103 | Si57 |
| 2.8214909499665710  | 4.8801767847476869  | 8.3582822582382796  | Si58 |
| 4.4960740842497007  | 7.8925724150253407  | 18.8821440067101953 | Si59 |
| 7.1674988112951352  | 4.2451658847210521  | 2.5943759479492017  | Si60 |
| -0.0639267785772226 | 8.3712276197540376  | 24.5948790531998256 | Si61 |
| -0.0429333980568112 | 8.3977443292743104  | 2.6243345670503908  | Si62 |
| 7.1338664960596230  | 4.1025879425235354  | 24.6710771561868221 | Si63 |
| 7.1752621823570735  | 4.2436783645452172  | 6.3354664762948181  | Si64 |
| -0.0660920836938006 | 8.3780866864972321  | 20.8359187502634775 | Si65 |
| -0.0372475229463776 | 8.4100865772360986  | 6.3705367823894514  | Si66 |
| 7.0944401805376298  | 4.2292643571805275  | 20.8549008867337520 | Si67 |
| 7.1709254830280944  | 4.2422917002462137  | 9.5654588984377238  | Si68 |
| -0.0402559195808374 | 8.3817231382146318  | 17.6022832666387856 | Si69 |
| -0.0517227963427169 | 8.4082290887727247  | 9.6020386897939822  | Si70 |
| 7.1639807930237129  | 4.2199822429032769  | 17.6184742553203471 | Si71 |
| 7.1899198446444936  | 6.5948046562160592  | 22.8322325724241288 | All  |
| 7.7837982139975903  | 4.6329894766156903  | 0.4597603682930099  | H1   |
| -0.0438915200038119 | 9.1402749226711375  | 0.4958125413411350  | H2   |
| -0.1343606917772293 | 9.1068734520776715  | 26.7244054254249903 | H3   |
| 6.6125448285851487  | 4.3902584829511024  | 26.8370884073592251 | H4   |
| 6.1113747181640719  | 8.7890149247183569  | 23.3502847373099343 | H5   |
| 5.0816081423986637  | 12.3909854528958121 | 22.4453098962106345 | H6   |
| 4.6029755594616244  | 11.1800994879683877 | 24.5338413951869789 | H7   |
| 6.3777318906612148  | 9.8078857158111195  | 25.6406840080595799 | H8   |
| 8.6543837957330609  | 9.6776359124553331  | 24.5984657660059298 | H9   |
| -5.2968675658495474 | 10.9163093774546685 | 22.5210427505096469 | H10  |
| -0.1862627330993553 | 1.9431343271568171  | 21.6454701109181862 | H11  |
| 12.9152575230274653 | 1.1885471142608761  | 20.7386739603038635 | H12  |
| -0.0739330704713757 | 1.7431648566233899  | 19.8786916091521952 | H13  |
| 1.3355898001694229  | 0.0468106706060642  | 20.9582229138817446 | H14  |
| 7.3729398887058144  | 11.8796393192861025 | 18.8588569247902527 | H15  |
| 7.6057269541925185  | 10.4750771030011229 | 19.9336574900572217 | H16  |
| 6.0084627190531554  | 11.2482798700528637 | 19.8157039191875519 | H17  |
| 5.8730876782082895  | 11.7961336576136127 | 22.9053657112936904 | C1   |
| 5.5971795752538291  | 11.1097086458860925 | 24.0895681822238785 | C2   |
| 6.5873068054927044  | 10.3284140061766649 | 24.7031413104810262 | C3   |

|                                        |                     |                     |     |
|----------------------------------------|---------------------|---------------------|-----|
| 7.8672480711334112                     | 10.2719817583993596 | 24.1321016842366163 | C4  |
| -6.2983122305404535                    | 10.9687686337749959 | 22.9532439903042693 | C5  |
| 7.1452563970034220                     | 11.7309405930188095 | 22.3140428082662723 | C6  |
| -6.9755179260301610                    | 12.3973641230640030 | 20.9853216573951755 | C7  |
| -0.4220588722513750                    | 1.2689627767362055  | 20.8087570305625391 | C8  |
| 7.0931023755523412                     | 11.4436618832762260 | 19.8304909981926194 | C9  |
| Co-adsorption of propylene and benzene |                     |                     |     |
| 6.9346868072173784                     | 4.0226608689835741  | 1.1281990350817916  | O1  |
| -0.1554177584768199                    | 8.1433911806327810  | 1.1468423204651099  | O2  |
| 5.6795204802862873                     | 3.3469321778992445  | 3.3052385828196833  | O3  |
| 1.2030384388247244                     | 8.8701838327746891  | 24.2018510989449958 | O4  |
| 8.3578050564675141                     | 3.2566413897591953  | 3.2792751336304877  | O5  |
| -1.4333804743896104                    | 9.1188664934939485  | 24.1955766797360852 | O6  |
| 7.1179843650613908                     | 5.6094047964852107  | 3.2948839003574335  | O7  |
| -0.3195565947157397                    | 6.6720705870616577  | 24.2001651196054439 | O8  |
| 1.0463432998941196                     | 9.1692237041498394  | 3.3298234058159535  | O9  |
| 5.7654492712769247                     | 3.0238079072705770  | 24.2128912971501791 | O10 |
| -1.5909013001074475                    | 8.8271363504350440  | 3.3190212692758068  | O11 |
| 8.4090564856017327                     | 3.3127467414886738  | 24.2202899238309861 | O12 |
| 0.0257119463227160                     | 6.6940726361708034  | 3.3053057334133955  | O13 |
| 6.7940088707038591                     | 5.4741010338017917  | 24.3624946860198115 | O14 |
| 4.8272237868025494                     | 1.1762649179198419  | 4.5991621277145427  | O15 |
| 1.8524278960039187                     | 11.1193507605355641 | 22.9225123034090430 | O16 |
| 10.6580596141142507                    | 3.5855108640317228  | 4.5882010926643515  | O17 |
| -3.7119320722487252                    | 8.6954316586440310  | 22.8852112363204334 | O18 |
| 5.6442092113876763                     | 7.4187564152561052  | 4.5873123069024260  | O19 |
| 1.2761613692878466                     | 4.9965441334468039  | 22.8960746422971475 | O20 |
| 2.2545376753345696                     | 11.1010491627174499 | 4.6980234721231904  | O21 |
| 4.4328604162190048                     | 1.2071906993206289  | 22.8131735556723996 | O22 |
| -3.8670910452016916                    | 8.8943753581419376  | 4.6999895859896901  | O23 |
| 10.7182410761039080                    | 3.3824993240707468  | 22.8772646917045392 | O24 |
| 1.0907498689892163                     | 4.6898895809203092  | 4.6966909670802730  | O25 |
| 5.7779832398229063                     | 7.7916943250294723  | 22.9132371453527526 | O26 |
| -1.3462723400496932                    | 4.6202708145510165  | 22.8226570345595512 | O27 |
| 8.2793968908070994                     | 7.5727270291938815  | 4.6688318068079520  | O28 |
| -2.6253904355733999                    | 11.0780924123734827 | 22.8530802179661023 | O29 |
| 9.4453523772921955                     | 1.2403088795531172  | 4.6389760158577920  | O30 |
| 3.4779187293011224                     | 9.0416459208928721  | 22.8503754606639973 | O31 |
| 3.3906358005013777                     | 3.3887081283030600  | 4.6684784322469834  | O32 |
| 8.5147715457925166                     | 7.3144558005257112  | 22.9168939226770512 | O33 |
| -1.5380665763937298                    | 4.9492188001065154  | 4.5642070905815677  | O34 |
| 9.2079504020862544                     | 1.2287445767767931  | 22.7653408633161618 | O35 |
| -2.3469493150007068                    | 11.0527185826533731 | 4.5654932814844642  | O36 |
| 3.5550804175603434                     | 3.7005162144990349  | 22.8875102130380661 | O37 |



---

|                     |                     |                     |     |
|---------------------|---------------------|---------------------|-----|
| 3.3539925381821591  | 8.6985210939705855  | 4.5824362746261702  | O38 |
| 5.7120125018986601  | 3.2811334795778899  | 5.9744522261356421  | O39 |
| 1.2080554249459023  | 8.9136711123642591  | 21.5171768526660117 | O40 |
| 8.3883487202831724  | 3.3028566768644794  | 5.9533803820563138  | O41 |
| -1.4482967010101584 | 9.1005195261575569  | 21.5169864667180413 | O42 |
| 7.0300615237818880  | 5.6089106957243278  | 5.9676019811339929  | O43 |
| -0.2728543753321446 | 6.6891345858404891  | 21.5270344482655673 | O44 |
| 1.1230926148917293  | 9.0790267930159896  | 6.0038676452563804  | O45 |
| 5.7756050017226581  | 3.0550168224777607  | 21.5126124879193412 | O46 |
| -1.5470013522765065 | 8.9371083479833082  | 5.9946271391971120  | O47 |
| 8.4168401112424043  | 3.4761394842008952  | 21.5423532439064864 | O48 |
| -0.0882493741482979 | 6.6960354359146166  | 5.9779705459312984  | O49 |
| 6.7092234040102117  | 5.5542377705905217  | 21.4799423606588569 | O50 |
| 7.0637675207146993  | 4.0597572815515042  | 8.0904797586802140  | O51 |
| -0.1693997844157833 | 8.2151270059983279  | 19.3818136835569490 | O52 |
| -0.1770505414689252 | 8.2167780562047792  | 8.1263397811389133  | O53 |
| 7.0181494914701990  | 3.9502994510137204  | 19.3752836703555573 | O54 |
| -1.7874433361853281 | 12.3395443097450155 | 6.8206005540967558  | O55 |
| 1.2564124779251173  | 12.2955884822860391 | 20.6385568268833559 | O56 |
| 11.4913822076027703 | 4.7875767783342340  | 6.8143630525251568  | O57 |
| 9.9903834961039131  | 7.4159658556504855  | 20.6865979419727104 | O58 |
| 4.2103316635143901  | 7.5426648140001964  | 6.8223496945370385  | O59 |
| 2.7102129965680453  | 4.9132270972871064  | 20.6679965124336178 | O60 |
| 1.6109547645295619  | 12.4630663194759670 | 6.8863707831742680  | O61 |
| -2.0801765745697969 | 12.3847853679323929 | 20.6122538379117834 | O62 |
| 9.7258931903250154  | 7.6634635061623246  | 6.8979677974933553  | O63 |
| 11.5565220804604500 | 4.5442844979798869  | 20.6493540102507076 | O64 |
| 2.5731848022886430  | 4.5860085632332215  | 6.8957221803476676  | O65 |
| 4.3843776274021442  | 7.8803483401799719  | 20.6366845252183992 | O66 |
| -0.0624396660492028 | 12.4030780225599937 | 4.8112738956821222  | O67 |
| 6.8166074244326493  | 0.0250453441980862  | 22.6855292011608540 | O68 |
| 10.5711126969681821 | 6.2370352393668842  | 4.8053634343713503  | O69 |
| 10.8720184486282427 | 6.0459540658537172  | 22.7530846720484163 | O70 |
| 3.3759090991590499  | 6.0431861809308947  | 4.8102047306852160  | O71 |
| 3.5689806515870433  | 6.3561417931330064  | 22.7044654382849131 | O72 |
| -0.1230914633501872 | 12.3998236557305468 | 8.9009763019400872  | O73 |
| -0.4035252991857776 | 12.4243053133243659 | 18.5511530780063438 | O74 |
| 10.6243704407137454 | 6.1871033648954965  | 8.9128655846701488  | O75 |
| 10.7523498302010569 | 5.9895219345623749  | 18.5696664754685230 | O76 |
| 3.4120453442838827  | 6.0939439112771261  | 8.9147797929202337  | O77 |
| 3.5368567730918063  | 6.3752181352183426  | 18.6057367036925072 | O78 |
| 4.6712906604699658  | 1.0274866128339812  | 9.0302043852560399  | O79 |
| 1.9043600292932137  | 11.1063510118009159 | 18.4233118137032044 | O80 |
| 10.8405266822303368 | 3.5231780491389371  | 9.0103903389417397  | O81 |

---

---

|                     |                     |                     |      |
|---------------------|---------------------|---------------------|------|
| -3.6895526660218723 | 8.6542038163768442  | 18.5109661907110947 | O82  |
| 5.6052067202358389  | 7.6221226809235070  | 9.0395746369619570  | O83  |
| 1.2375066652201321  | 5.0342356571020863  | 18.5140513414856045 | O84  |
| 2.2681316190774279  | 11.2218422348387303 | 9.1206792948146695  | O85  |
| 4.4936254934155384  | 1.2481833984005641  | 18.4385576397526307 | O86  |
| -4.0003823068702173 | 8.8474024924712076  | 9.1497836320799717  | O87  |
| 10.7675532894842281 | 3.3230894829899822  | 18.4417960701147479 | O88  |
| 1.2035047137193366  | 4.5951880341129643  | 9.1503045719439253  | O89  |
| 5.8446651160580201  | 7.7297009838697637  | 18.4555848419378066 | O90  |
| -1.3797670593282265 | 4.6334958528550745  | 18.4848256618384212 | O91  |
| 8.2413342273961590  | 7.3790571752621252  | 9.0521522046070153  | O92  |
| -2.7269440513154235 | 11.1122311930731410 | 18.4109250873633137 | O93  |
| 9.3199671806746149  | 1.3579972377841860  | 9.0569095056100828  | O94  |
| 3.5573731532364175  | 9.0475164569025477  | 18.4424627570031490 | O95  |
| 3.5743353199259196  | 3.4361914424279343  | 9.0391344534579243  | O96  |
| 8.4469105924244055  | 7.3330111545618424  | 18.5673735347035880 | O97  |
| -1.4058091045941221 | 5.0311650196978670  | 8.9162653451427758  | O98  |
| 9.1133933663970748  | 1.2667726560376631  | 18.5694585714090579 | O99  |
| -2.3173756500949518 | 10.8850815963271064 | 8.9306532513898613  | O100 |
| 3.5471142063141188  | 3.7110537963292889  | 18.5047601777936634 | O101 |
| 3.2049277580396671  | 8.7510164179573877  | 8.9107770251283043  | O102 |
| 5.9169762940765755  | 3.0321254369844288  | 10.2530312832728949 | O103 |
| 1.2131882531312224  | 8.8361524895119476  | 17.2000277076690509 | O104 |
| 8.4974295411702379  | 3.5874182225238118  | 10.2702805191285549 | O105 |
| -1.4089571110093044 | 9.1334792252835442  | 17.2144593680221902 | O106 |
| 6.7251961514470047  | 5.5440519225409091  | 10.2618952047399095 | O107 |
| -0.3470384890436060 | 6.7112652975802147  | 17.1909914435447853 | O108 |
| 0.9816054515733814  | 9.2179808426557468  | 10.2994002367374140 | O109 |
| 5.7881063714082579  | 3.2008348979166299  | 17.1508892359038221 | O110 |
| -1.6134470975466022 | 8.7174115468327820  | 10.3062885745401704 | O111 |
| 8.4244088861069653  | 3.4339736196141395  | 17.1796306713739249 | O112 |
| 0.1147005861968431  | 6.7206670120775200  | 10.3048859403327597 | O113 |
| 6.8971995946272235  | 5.5901506922918625  | 17.2666165272589858 | O114 |
| 3.7600400217900516  | 2.0278227297014104  | 11.3017288794526536 | O115 |
| 3.0684528389593293  | 10.3721336860032700 | 16.1805341566946232 | O116 |
| 10.4768716491597864 | 2.2501949524197036  | 11.2930965463377255 | O117 |
| -3.6776582874608659 | 9.9568868290845067  | 16.2102777438230348 | O118 |
| 6.9210474481603237  | 7.9096536451599553  | 11.3155301546574645 | O119 |
| 0.0689456296258624  | 4.2943826761280359  | 16.2679396153454299 | O120 |
| 3.2975900375149152  | 9.9892172755638846  | 11.2477976538218520 | O121 |
| 3.4799329024880681  | 2.3686053443276176  | 16.2381341077144050 | O122 |
| -3.4196068987274728 | 10.3435495569052485 | 11.2810207594894241 | O123 |
| 10.2909937344290405 | 1.8321856059547474  | 16.2767754664744508 | O124 |
| -0.4030151232990615 | 4.3355880614994637  | 11.2640849710781890 | O125 |

---

---

|                     |                     |                     |      |
|---------------------|---------------------|---------------------|------|
| 7.3261483611206373  | 7.9717102172227188  | 16.2551903691402586 | O126 |
| -4.9793938772638260 | 12.4128440086408069 | 11.8733704627113319 | O127 |
| 4.7052514405381087  | 12.3692930593384798 | 15.5001353246066316 | O128 |
| 13.0400529764719195 | 1.9718386222657200  | 11.9825372000565675 | O129 |
| 8.2126094645345056  | 10.3875103362520260 | 15.5406795430224438 | O130 |
| 5.8624052350352560  | 10.2918366317774410 | 11.8847644461948061 | O131 |
| 0.9613688938223623  | 1.9021335264358175  | 15.5034514273219379 | O132 |
| 4.2547064718627343  | 12.3762679754455931 | 11.8381199563702992 | O133 |
| -4.5584046482418614 | 12.4093749065641017 | 15.7624718682924811 | O134 |
| 8.4637036175472726  | 9.9747023215495183  | 11.8387553739984863 | O135 |
| 12.8103136421672801 | 2.3490033912331629  | 15.6878209227438443 | O136 |
| 1.2053670504077088  | 2.3300829522260904  | 11.8525134813121742 | O137 |
| 5.6285012745186442  | 9.9245835206737461  | 15.7418556820614146 | O138 |
| 2.9626358126930223  | 1.6607253426851405  | 13.7603017288254250 | O139 |
| 3.9549492990041690  | 10.5107242527725440 | 13.7298372823837109 | O140 |
| 11.0705199692687444 | 1.6930698432300748  | 13.7693543615279061 | O141 |
| -4.2461213082438363 | 10.6670126849539617 | 13.7554675043154653 | O142 |
| 7.0314353033165977  | 8.7893542356134251  | 13.7693851744020588 | O143 |
| -0.2048399845842319 | 3.5583151011789322  | 13.7666070840897081 | O144 |
| -0.2020387699451138 | 8.1118555212918491  | 26.3699841545794342 | O145 |
| 7.0871449312458692  | 3.7483084255384429  | 26.4300041608049980 | O146 |
| 4.9047800063700464  | 2.7985611730832365  | 4.6280895590309363  | Si1  |
| 1.9064616767984450  | 9.5022378933542679  | 22.8797297320777595 | Si2  |
| 9.2100151623049467  | 2.8492153466372372  | 4.6068731248004431  | Si3  |
| -2.3055952469090459 | 9.4861633028513204  | 22.8664699196860575 | Si4  |
| 7.0156550657670991  | 6.5493734857869716  | 4.6220339978897922  | Si5  |
| -0.1676840280459011 | 5.7447157250422416  | 22.8687769247325470 | Si6  |
| 1.9459611937749486  | 9.5045547371106487  | 4.6474579041595945  | Si7  |
| 4.8961856884084698  | 2.7734795797726290  | 22.8685735119734908 | Si8  |
| -2.3326577990054020 | 9.4302858426135305  | 4.6393278755573268  | Si9  |
| 9.1694242878915801  | 2.8593251517917939  | 22.8615884170902000 | Si10 |
| -0.1326293392975519 | 5.7591781298974389  | 4.6297598090560150  | Si11 |
| 4.4699659396075644  | 2.3877453158389601  | 9.8934814748365270  | Si12 |
| 2.4347997695896995  | 9.8382811561261789  | 17.5702030933249382 | Si13 |
| 9.7824314935267758  | 2.6668855360534645  | 9.8950113122592622  | Si14 |
| -2.8774085371390425 | 9.7158120678207531  | 17.5999111416953724 | Si15 |
| 6.8849137084797141  | 7.1201959580344134  | 9.9041405266364588  | Si16 |
| -0.1135975753762297 | 5.1596910281361126  | 17.6243767406364924 | Si17 |
| 2.4429319019565137  | 9.8000521816108783  | 9.8854877496016087  | Si18 |
| 4.3345248092593787  | 2.6245479589843201  | 17.5918491046301142 | Si19 |
| -2.8450889285347332 | 9.7020063319506527  | 9.9081283165334550  | Si20 |
| 9.6575752947656852  | 2.4698771981813734  | 17.6268563190663450 | Si21 |
| -0.1214614446334195 | 5.1628611754636387  | 9.8997841344776187  | Si22 |
| 7.1310966904728135  | 7.1507551554575333  | 17.6425640689973235 | Si23 |

---

---

|                     |                     |                     |      |
|---------------------|---------------------|---------------------|------|
| 2.5376980224110222  | 1.4775319122072481  | 12.2004022894826836 | Si24 |
| 4.3397114493982842  | 10.8000600207721789 | 15.2811164130261528 | Si25 |
| 11.5208934760639288 | 1.4495138598830042  | 12.2248304805394028 | Si26 |
| -4.6777374874610613 | 10.8529152281222814 | 15.3126920167995308 | Si27 |
| 7.0650230193381951  | 9.2466126382572931  | 12.2078320836761982 | Si28 |
| -0.2007928414363054 | 3.0256671332846001  | 15.3066255905364468 | Si29 |
| 4.3451479283894408  | 10.7956976859603753 | 12.1766898461030237 | Si30 |
| 2.5163193850029417  | 1.4633764387794637  | 15.3105816007564517 | Si31 |
| -4.6555581783490334 | 10.8517124357117840 | 12.1920833617854463 | Si32 |
| 11.5234572564685323 | 1.4375027614655504  | 15.3122106472921757 | Si33 |
| -0.1996893288764203 | 3.0477562356018795  | 12.2201615625488298 | Si34 |
| 7.0539815024207266  | 9.2656733805147322  | 15.3241897589295171 | Si35 |
| -1.6424219164184954 | 12.3680010365464099 | 5.2114317100852539  | Si36 |
| 1.1636914447370232  | 12.4347790639265785 | 22.2455621063678386 | Si37 |
| 11.4035884491780006 | 4.8933868033859360  | 5.2048826854371004  | Si38 |
| 9.9894710614430977  | 7.3511069747348969  | 22.3115483479429031 | Si39 |
| 4.1424966124612173  | 7.4237293506840860  | 5.2119692282332402  | Si40 |
| 2.7785049651504958  | 4.9782468129594326  | 22.2791702726200178 | Si41 |
| 1.5027564430507088  | 12.4275100283460436 | 5.2722372336559031  | Si42 |
| -1.9673967941739763 | 12.4273542744034575 | 22.2263357789800331 | Si43 |
| 9.7880893579575421  | 7.5873091750241413  | 5.2824369451308106  | Si44 |
| 11.5442062640867817 | 4.6479872390049017  | 22.2647200308025255 | Si45 |
| 2.6116693161109152  | 4.6805737368387330  | 5.2803964092856148  | Si46 |
| 4.2359015040294565  | 7.7469430355047670  | 22.2298114279995573 | Si47 |
| -1.6838470360087001 | 12.2907850914007799 | 8.4325427148565364  | Si48 |
| 1.1549698945784694  | 12.4070987724914783 | 19.0301406781729803 | Si49 |
| 11.4890983452869690 | 4.8891326051042778  | 8.4265519013332728  | Si50 |
| 9.9860665892649667  | 7.3393855977214608  | 19.0800432985525816 | Si51 |
| 4.1067290911571721  | 7.4923864202538493  | 8.4340590722020305  | Si52 |
| 2.7602216734374880  | 5.0100925951867721  | 19.0550322503423111 | Si53 |
| 1.4575823261474143  | 12.4818993558102811 | 8.4968718219902009  | Si54 |
| -1.9746030643628938 | 12.4221700212181059 | 19.0013724346082995 | Si55 |
| 9.7620321031818253  | 7.5150999298857375  | 8.5091791612358971  | Si56 |
| 11.5270472014088305 | 4.6254425282174489  | 19.0371237879103923 | Si57 |
| 2.6912466974644942  | 4.6857190309107208  | 8.5059998119003151  | Si58 |
| 4.3266399300057854  | 7.7402928526578956  | 19.0161695028466795 | Si59 |
| 7.0336880595972122  | 4.0658172285965319  | 2.7495720720097094  | Si60 |
| -0.1959566320111623 | 8.2025720907260720  | 24.7480299606252956 | Si61 |
| -0.1691554382823037 | 8.2220821701389806  | 2.7697780204104028  | Si62 |
| 7.0037583371046548  | 3.9373715023922067  | 24.8091323682136426 | Si63 |
| 7.0483668867738416  | 4.0632978956960830  | 6.4870265504854228  | Si64 |
| -0.1799660423367087 | 8.2258468436636960  | 20.9879212225268823 | Si65 |
| -0.1724137979940785 | 8.2319648658499727  | 6.5209101157059255  | Si66 |
| 6.9764357383742306  | 4.0463006443021179  | 20.9900295045437062 | Si67 |

---

|                     |                     |                     |      |
|---------------------|---------------------|---------------------|------|
| 7.0502475004724934  | 4.0554478659812006  | 9.7156293851996747  | Si68 |
| -0.1827668176415207 | 8.2225673440314928  | 17.7522055460573647 | Si69 |
| -0.1729996653971417 | 8.2183322724895955  | 9.7542598284687525  | Si70 |
| 7.0366788200027530  | 4.0483769964766108  | 17.7586065264972817 | Si71 |
| 7.0493852784552526  | 6.4236710580134488  | 22.9475907460105901 | All  |
| 7.6293555142793341  | 4.4551731334726581  | 0.6089615672502422  | H1   |
| -0.1932479190225598 | 8.9702987269296415  | 0.6427318256768466  | H2   |
| -0.2666406855699455 | 8.9347811794689918  | 26.8780879634492571 | H3   |
| 6.6011837758136291  | 4.3921753000629797  | 26.9669557938847859 | H4   |
| 6.1978767018175285  | 8.7239116045292580  | 22.9857767825787818 | H5   |
| 5.8032436659693323  | 10.8684710505391244 | 21.8904506513223645 | H6   |
| 6.2858031376940469  | 10.6144160667402314 | 24.2608823762152177 | H7   |
| 8.0345026842951270  | 10.0781676798719619 | 23.8719868057596294 | H8   |
| 7.8646003639981510  | 11.2499443566468642 | 20.4970113253701065 | H9   |
| 7.4430332206997036  | 9.5432850516413747  | 20.4040039550020182 | H10  |
| -5.6537688197178646 | 10.0646566295140900 | 21.4775060625846557 | H11  |
| -0.6608803098579705 | 2.2934547739582052  | 21.8235720873457311 | H12  |
| 11.7281414888209756 | 0.8865110830940347  | 21.6678700950185998 | H13  |
| 4.1724988663789242  | 11.8983082158883295 | 19.6952918074604035 | H14  |
| 5.8544403554861661  | 11.8691687204000722 | 17.8570213754249032 | H15  |
| 0.6496523550475755  | 0.8107220643313372  | 17.9884061659717567 | H16  |
| 1.0149917487744218  | 2.2660336971774417  | 19.9848552646090667 | H17  |
| 7.7851753653600078  | 10.3297174259397941 | 21.0974645050451599 | C1   |
| 6.8023425112558620  | 10.5399439251094744 | 22.1986793656295376 | C2   |
| 7.0484740903834089  | 10.3843561278275160 | 23.5128522541229188 | C3   |
| -0.8193913305005168 | 1.6576201763947078  | 20.9508874813888326 | C4   |
| 12.4674724741288472 | 0.8632321407269040  | 20.8645494252116173 | C5   |
| 12.2731097007460566 | 0.0366340646149948  | 19.7538404316677259 | C6   |
| 13.2159939117515677 | 0.0164474931372411  | 18.7228241850438408 | C7   |
| -0.0794323484340334 | 0.8252689756000579  | 18.8001943129673847 | C8   |
| 0.1218978526174225  | 1.6411999437480624  | 19.9170543570124643 | C9   |

TS3

|                     |                    |                     |     |
|---------------------|--------------------|---------------------|-----|
| 6.9629543991855787  | 4.0360523899905134 | 1.1074381967528895  | O1  |
| -0.1318184752778047 | 8.1577664745569187 | 1.1274523360499462  | O2  |
| 5.7017576095426046  | 3.3497350590958486 | 3.2790502772547980  | O3  |
| 1.2131910429260753  | 8.8658405774372184 | 24.1543728378616080 | O4  |
| 8.3801256194332616  | 3.2811091993851114 | 3.2661099821905561  | O5  |
| -1.4219896797196263 | 9.1127272424295338 | 24.1318130023198130 | O6  |
| 7.1202611826144580  | 5.6235148323188975 | 3.2750486473233043  | O7  |
| -0.3096090110415322 | 6.6652857570567843 | 24.1912088751947216 | O8  |
| 1.0533088911537165  | 9.1931410140450556 | 3.3149499944538974  | O9  |
| 5.7870000398845578  | 3.0717580784472109 | 24.2001492896298132 | O10 |
| -1.5814541819124095 | 8.8304182248490779 | 3.2952076338891914  | O11 |
| 8.4277231733522893  | 3.2970699182438450 | 24.2037593357443441 | O12 |

---

|                     |                     |                     |     |
|---------------------|---------------------|---------------------|-----|
| 0.0501836870416001  | 6.7099116053941446  | 3.2857591991105140  | O13 |
| 6.8842387702292207  | 5.5123766751799774  | 24.2815642057906054 | O14 |
| 4.8352023356296181  | 1.1866469507723985  | 4.5760439625016103  | O15 |
| 1.8261209421011273  | 11.1368816715841970 | 22.9195889048061296 | O16 |
| 10.6805608643881964 | 3.6006279391265652  | 4.5753307679987092  | O17 |
| -3.7119327977746654 | 8.7715843505261049  | 22.8081557248703852 | O18 |
| 5.6579361215083672  | 7.4421204077719443  | 4.5698010054366680  | O19 |
| 1.2325897976824893  | 4.9475973444113732  | 22.8415766493892463 | O20 |
| 2.2705630189139683  | 11.1214844156238915 | 4.6829076218410721  | O21 |
| 4.4506568487058171  | 1.2696326814708365  | 22.7768462705765948 | O22 |
| -3.8570103020427489 | 8.9084206168692859  | 4.6804365338773177  | O23 |
| 10.7235016148630855 | 3.4172220881811528  | 22.8489979739642095 | O24 |
| 1.1118535826201197  | 4.7060559124724781  | 4.6791579742888292  | O25 |
| 5.7447160077659580  | 7.7830033649169694  | 22.8734443002754944 | O26 |
| -1.3700224166499850 | 4.6507645172512149  | 22.7867017483795671 | O27 |
| 8.2937606723848276  | 7.5805802809194409  | 4.6448643172414856  | O28 |
| -2.5805912948422800 | 11.1304427544776523 | 22.8370588657586140 | O29 |
| 9.4606024576427075  | 1.2607715782966908  | 4.6268411802979630  | O30 |
| 3.4882977918149747  | 9.1082825643320078  | 22.7843126158801894 | O31 |
| 3.4130115376976229  | 3.4095259444392889  | 4.6428233751451682  | O32 |
| 8.5087128685327045  | 7.4447169196812455  | 22.8729925065146524 | O33 |
| -1.5173951668107764 | 4.9664901279741054  | 4.5436130727675357  | O34 |
| 9.2698888320779389  | 1.2312594068201399  | 22.7577448478376958 | O35 |
| -2.3297068756684123 | 11.0637484734265890 | 4.5322812457372539  | O36 |
| 3.5655926198580898  | 3.7670825165181987  | 22.9004927546263453 | O37 |
| 3.3645738835513015  | 8.7168206125817278  | 4.5601692018124993  | O38 |
| 5.7330735394080321  | 3.2859283056538460  | 5.9481840032581434  | O39 |
| 1.1974181751036603  | 8.9657864850130213  | 21.4723020959820339 | O40 |
| 8.4092393672373529  | 3.3284311548239227  | 5.9394689626625361  | O41 |
| -1.4524432164082022 | 9.1460635473555261  | 21.4503411690877712 | O42 |
| 7.0334781593161537  | 5.6241871038214164  | 5.9482007194062074  | O43 |
| -0.2779907321667814 | 6.7292748390609765  | 21.5218019133852785 | O44 |
| 1.1361031199295981  | 9.0999854695756159  | 5.9861571909406122  | O45 |
| 5.7725139159282923  | 3.1515511336996664  | 21.4993078959540895 | O46 |
| -1.5350699193665815 | 8.9500912005564093  | 5.9681837114499920  | O47 |
| 8.4275894975369958  | 3.4324515126974844  | 21.5077669227115820 | O48 |
| -0.0682182789662331 | 6.7134053870314787  | 5.9573544542419716  | O49 |
| 6.8478206674266531  | 5.6129899878529894  | 21.4173639086033276 | O50 |
| 7.0672910622136573  | 4.0708756311918037  | 8.0702848169409709  | O51 |
| -0.1643696303503290 | 8.2107974902977592  | 19.3507642380116209 | O52 |
| -0.1717011194297609 | 8.2379681788495702  | 8.1028464489749918  | O53 |
| 7.0370868506472810  | 3.9419198785808964  | 19.3518441336123068 | O54 |
| -1.7641511795772615 | 12.3456683787538886 | 6.7909267059419820  | O55 |
| 1.3397710409090111  | 12.3216942597489538 | 20.6108524911792941 | O56 |

---

---

|                     |                     |                     |      |
|---------------------|---------------------|---------------------|------|
| 11.5174350741779357 | 4.8053351540347293  | 6.7983556436898054  | O57  |
| 9.9921961606029583  | 7.4669988960460962  | 20.6379672880371885 | O58  |
| 4.2258182314126698  | 7.5842174045269148  | 6.8066027366578741  | O59  |
| 2.7105950147042028  | 4.8666556638709482  | 20.6452134134820398 | O60  |
| 1.6103990808920123  | 12.4834864769746101 | 6.8683601892826900  | O61  |
| -2.1158166323824066 | 12.4140332772621615 | 20.5824060751978841 | O62  |
| 9.7294426575061710  | 7.6732737997180891  | 6.8780245751194320  | O63  |
| 11.5534389079579149 | 4.5613701821527020  | 20.6126461273251280 | O64  |
| 2.5919742565832848  | 4.5843471436974683  | 6.8805011832010470  | O65  |
| 4.3381887762194049  | 7.8995861185342342  | 20.6086677372079912 | O66  |
| -0.0478195992876795 | 12.4208564718882073 | 4.7804078840949495  | O67  |
| 6.8434404917925002  | 0.1095650385883926  | 22.6046992072259307 | O68  |
| 10.5910978144166101 | 6.2519671842745383  | 4.7900745407214940  | O69  |
| 10.8510574955786723 | 6.0948411311419264  | 22.7012782340129604 | O70  |
| 3.3946489871879475  | 6.0623890790542596  | 4.8090750498799411  | O71  |
| 3.4096963779306777  | 6.4472846998772528  | 22.6495258883203014 | O72  |
| -0.1165771295839431 | 12.4065858986162194 | 8.8858035712834642  | O73  |
| -0.3746137427865408 | 12.4212629148751272 | 18.5600287918087155 | O74  |
| 10.6391536232115733 | 6.2023105051281560  | 8.8935812749550092  | O75  |
| 10.7591703137793324 | 6.0058486517252296  | 18.5295096429480921 | O76  |
| 3.4266981983670535  | 6.1143037992219051  | 8.8855093750569321  | O77  |
| 3.5369504968069969  | 6.3511449136056806  | 18.5785775042823502 | O78  |
| 4.6821362507121158  | 1.0477128855624731  | 8.9877505293654565  | O79  |
| 1.9234522892991963  | 11.0899935777044814 | 18.3994201907375832 | O80  |
| 10.8543445796381750 | 3.5371225003545681  | 8.9901160764251173  | O81  |
| -3.6888553015287293 | 8.6701562212206476  | 18.4578649689720038 | O82  |
| 5.6165491764748525  | 7.6439010879624805  | 9.0257288446526189  | O83  |
| 1.2347286437215339  | 5.0124970393006629  | 18.4975007107768832 | O84  |
| 2.2858081707958959  | 11.2453886284537763 | 9.1007654012203485  | O85  |
| 4.5172171704057789  | 1.2383012490537695  | 18.3787523805386712 | O86  |
| -4.0008800930052004 | 8.8619398015392523  | 9.1266935348382123  | O87  |
| 10.7754855467555242 | 3.3279602008455900  | 18.4084349194675312 | O88  |
| 1.2179787039803496  | 4.6212237099431182  | 9.1333228553921533  | O89  |
| 5.8420347474760534  | 7.7214069149237909  | 18.4440446485022775 | O90  |
| -1.3750977593296532 | 4.6175265189153594  | 18.4543012966328170 | O91  |
| 8.2502798904166390  | 7.3777246580594236  | 9.0369583014424322  | O92  |
| -2.7042226113844552 | 11.1123652756100544 | 18.3890344415301819 | O93  |
| 9.3201205095257862  | 1.3788785267717998  | 9.0407056229252536  | O94  |
| 3.5738866090878947  | 9.0234730653716841  | 18.3784519289231341 | O95  |
| 3.5888623698152275  | 3.4592747069181300  | 9.0389449870258911  | O96  |
| 8.4525297267573443  | 7.3556456665512719  | 18.5196904336604753 | O97  |
| -1.3920738554302849 | 5.0457068447128615  | 8.9076155010009632  | O98  |
| 9.1532880980584554  | 1.2466750695225808  | 18.4948592960533311 | O99  |
| -2.3195785684153689 | 10.9018546279881772 | 8.8968614983057019  | O100 |

---

---

|                     |                     |                     |      |
|---------------------|---------------------|---------------------|------|
| 3.5405223474370033  | 3.6907736176794113  | 18.4696351296734527 | O101 |
| 3.2146992348467673  | 8.7692877089540424  | 8.9069271192813986  | O102 |
| 5.9361457467375702  | 3.0308904820848603  | 10.2355995478283948 | O103 |
| 1.2199272916964361  | 8.8289414749783024  | 17.1629899015839342 | O104 |
| 8.5114593493028465  | 3.6153552284096744  | 10.2481081235899776 | O105 |
| -1.3920405678026273 | 9.1368341421029324  | 17.1797104716161577 | O106 |
| 6.7169528227721047  | 5.5510137608746515  | 10.2401047477829348 | O107 |
| -0.3470829217083491 | 6.7099784102677171  | 17.1691190220706069 | O108 |
| 0.9795076997255139  | 9.2532823386071339  | 10.2727757325312563 | O109 |
| 5.7992335028016333  | 3.2109061063357163  | 17.1216983813727275 | O110 |
| -1.6124790760659757 | 8.7395913686049571  | 10.2802221644226481 | O111 |
| 8.4283478524732658  | 3.4455905163860927  | 17.1496759091714637 | O112 |
| 0.1265224916980676  | 6.7513911393578541  | 10.2822735144416217 | O113 |
| 6.9028401338015026  | 5.5936181576732613  | 17.2414013035858602 | O114 |
| 3.7811837332620075  | 2.0126297006938541  | 11.2769383836174661 | O115 |
| 3.0679460451482568  | 10.3716321308614265 | 16.1410511299125368 | O116 |
| 10.4832822910466756 | 2.2695624915243062  | 11.2765918905586773 | O117 |
| -3.6435846532511222 | 9.9756378099990481  | 16.1668503966451951 | O118 |
| 6.9328177134217954  | 7.9054186277531633  | 11.3050241081316614 | O119 |
| 0.0801341732159195  | 4.3086273401858532  | 16.2354812734627565 | O120 |
| 3.2884079339009187  | 10.0112413184848386 | 11.2441704335960111 | O121 |
| 3.5068785160809481  | 2.3745440143813425  | 16.1918789745687377 | O122 |
| -3.4185001906314820 | 10.3701210160352488 | 11.2488615088670141 | O123 |
| 10.2950849601750392 | 1.8889697340633069  | 16.2102063772445852 | O124 |
| -0.3768741652581289 | 4.3761389057084719  | 11.2584197484822273 | O125 |
| 7.3042983586899517  | 7.9711522282673908  | 16.2258937203071589 | O126 |
| -4.9965044528923457 | 12.4242169651262380 | 11.8496459569330064 | O127 |
| 4.7080369174959680  | 12.3896252659741588 | 15.5450476609306349 | O128 |
| 13.0626504160403769 | 1.9954509032517891  | 11.9064665014086977 | O129 |
| 8.2319047246045471  | 10.3800198240008612 | 15.5405888165526083 | O130 |
| 5.8650523804296073  | 10.2906396560035382 | 11.8414807730121332 | O131 |
| 0.9745135135226548  | 1.9090267122238196  | 15.5062064522573930 | O132 |
| 4.2840838377893586  | 12.3941722036715678 | 11.7723822015083996 | O133 |
| -4.5505202104056908 | 12.4141803222422222 | 15.7298565054099448 | O134 |
| 8.4662725687012284  | 9.9793383151036679  | 11.8002093706042732 | O135 |
| 12.8341261672460067 | 2.3526868471085050  | 15.6955222426658150 | O136 |
| 1.2290261218469509  | 2.3594474397706389  | 11.8090254153308294 | O137 |
| 5.6429206499530506  | 9.9552372706224315  | 15.7308036616586566 | O138 |
| 2.9541973341103858  | 1.6699396730827636  | 13.7311713419436767 | O139 |
| 3.9905325807978445  | 10.5773947100469279 | 13.7083978209068444 | O140 |
| 11.1404379094645343 | 1.6805461608293029  | 13.7337406172571885 | O141 |
| -4.2553896486466929 | 10.6715595680059394 | 13.7221534791545601 | O142 |
| 7.0324467885962330  | 8.8198797176226158  | 13.7476660372929977 | O143 |
| -0.1993470750008017 | 3.5384319902825743  | 13.7405038926305245 | O144 |

---



---

|                     |                     |                     |      |
|---------------------|---------------------|---------------------|------|
| -0.2052566513674980 | 8.1431669234628767  | 26.3298605562549710 | O145 |
| 7.1059577707065138  | 3.8309618066521693  | 26.3956905657049852 | O146 |
| 4.9227209429645287  | 2.8085549802202845  | 4.6022213214092496  | Si1  |
| 1.9204383280818957  | 9.5178646428417881  | 22.8397072249371611 | Si2  |
| 9.2298346795052915  | 2.8701391667823701  | 4.5938164163867921  | Si3  |
| -2.2838424482203488 | 9.5288090393385296  | 22.8150673807947939 | Si4  |
| 7.0243111048852018  | 6.5642854020541810  | 4.6015220360631686  | Si5  |
| -0.1740194933718797 | 5.7564736051570566  | 22.8451698188076229 | Si6  |
| 1.9584172563724875  | 9.5256874930757736  | 4.6294677380751317  | Si7  |
| 4.9106352731488219  | 2.8465206820562634  | 22.8583246432808131 | Si8  |
| -2.3213225907320818 | 9.4411505426315525  | 4.6129389809726442  | Si9  |
| 9.1840460106065755  | 2.8623741706466421  | 22.8418022511743182 | Si10 |
| -0.1112431959068161 | 5.7753785294998270  | 4.6096044161321883  | Si11 |
| 4.4857915470390184  | 2.3954406760866482  | 9.8719869536093459  | Si12 |
| 2.4441248329403686  | 9.8258565251744372  | 17.5341818829567195 | Si13 |
| 9.7914710281216895  | 2.6868833667459047  | 9.8753978776287354  | Si14 |
| -2.8553860794522441 | 9.7258047823972351  | 17.5611699541913495 | Si15 |
| 6.8914362926526191  | 7.1265232747838292  | 9.8878434583506625  | Si16 |
| -0.1059448133936294 | 5.1627159999693975  | 17.6008189541332811 | Si17 |
| 2.4483164303956739  | 9.8243515659651806  | 9.8712463064485192  | Si18 |
| 4.3496129521745548  | 2.6266158218653470  | 17.5551984526272840 | Si19 |
| -2.8454232943534894 | 9.7214618628770832  | 9.8786404412377298  | Si20 |
| 9.6623560598804836  | 2.4844010899859450  | 17.5808484581683615 | Si21 |
| -0.1046417552153489 | 5.1915437351922602  | 9.8845840584120683  | Si22 |
| 7.1217279151391724  | 7.1532789651281874  | 17.6199277753247152 | Si23 |
| 2.5443710996878490  | 1.4857036465238178  | 12.1692627518052809 | Si24 |
| 4.3499841132024795  | 10.8244320558171498 | 15.2713713004597373 | Si25 |
| 11.5518993023410310 | 1.4625429981392919  | 12.1756642544641522 | Si26 |
| -4.6661548362427476 | 10.8577042053262591 | 15.2836858011651469 | Si27 |
| 7.0696644960174897  | 9.2538104201880351  | 12.1807926795789694 | Si28 |
| -0.1838548026156899 | 3.0314916067804911  | 15.2857723282423965 | Si29 |
| 4.3599758088892431  | 10.8198724112925397 | 12.1442513950689737 | Si30 |
| 2.5277107227220621  | 1.4693603303306175  | 15.2859057867590575 | Si31 |
| -4.6603209587349870 | 10.8637499755971625 | 12.1595521782946587 | Si32 |
| 11.5448921452951030 | 1.4537453668495997  | 15.2908185187665300 | Si33 |
| -0.1798279034748176 | 3.0649868146584063  | 12.1824169096412067 | Si34 |
| 7.0580615968494174  | 9.2758201872939718  | 15.3075688741327376 | Si35 |
| -1.6275904952126670 | 12.3790397023417498 | 5.1816885464542430  | Si36 |
| 1.2010505834703347  | 12.4640698384118416 | 22.2170629259847878 | Si37 |
| 11.4261667020196906 | 4.9097304101682315  | 5.1888591429111264  | Si38 |
| 9.9763175407985454  | 7.4100661814481281  | 22.2679540377482326 | Si39 |
| 4.1573359887035757  | 7.4485139479896008  | 5.1975001393918925  | Si40 |
| 2.7539442751329926  | 5.0147108235292279  | 22.2586273294969210 | Si41 |
| 1.5139757416397419  | 12.4471006490355354 | 5.2532548439022344  | Si42 |

---

---

|                     |                     |                     |      |
|---------------------|---------------------|---------------------|------|
| -1.9462021071999152 | 12.4895171872780253 | 22.1932259487789274 | Si43 |
| 9.8003284652140259  | 7.5990688067723688  | 5.2624635850718855  | Si44 |
| 11.5245069465400274 | 4.6903579827620723  | 22.2309774294346845 | Si45 |
| 2.6317206988037807  | 4.6946751903948885  | 5.2656964180694050  | Si46 |
| 4.2834175744376646  | 7.7719388613334175  | 22.2402352663166560 | Si47 |
| -1.6740528781704169 | 12.3038025675544898 | 8.4030242830524706  | Si48 |
| 1.1954099411616435  | 12.4032305489965076 | 19.0066424275644543 | Si49 |
| 11.5054282071079008 | 4.9043316336185230  | 8.4105622081182414  | Si50 |
| 9.9879974213847369  | 7.3575428259251918  | 19.0354971962125674 | Si51 |
| 4.1190783820858208  | 7.5173537918133837  | 8.4172219480853414  | Si52 |
| 2.7634142208185013  | 4.9890997426715984  | 19.0400477254021006 | Si53 |
| 8.6800557925492363  | 0.0001228140252597  | 8.4794574715006554  | Si54 |
| -1.9537950276332765 | 12.4277413322666561 | 18.9755137204462478 | Si55 |
| 9.7684521490537044  | 7.5245740486835349  | 8.4891720080725914  | Si56 |
| 11.5246357828241042 | 4.6403698903242168  | 19.0014235158451115 | Si57 |
| 2.7067159541942178  | 4.7026639101702123  | 8.4901693421295494  | Si58 |
| 4.3184569436199087  | 7.7179422065213874  | 19.0090589160680281 | Si59 |
| 7.0525710468127789  | 4.0793754771806423  | 2.7289304302051467  | Si60 |
| -0.1818177907902436 | 8.2076250302857972  | 24.7064230519453503 | Si61 |
| -0.1530237520464723 | 8.2368274407123607  | 2.7500365196694343  | Si62 |
| 7.0416154290306743  | 3.9925762097684094  | 24.7672434329041451 | Si63 |
| 7.0606697841934896  | 4.0781395821183803  | 6.4667156181956740  | Si64 |
| -0.1762405585799129 | 8.2564692374542314  | 20.9581733497690799 | Si65 |
| -0.1597536529583818 | 8.2499239363834818  | 6.4976523062576224  | Si66 |
| 7.0166072236460062  | 4.0899960161002173  | 20.9709734041511098 | Si67 |
| 7.0576843971634027  | 4.0659116989355653  | 9.6953298854633339  | Si68 |
| -0.1729780603458480 | 8.2225331114542488  | 17.7257257904066137 | Si69 |
| -0.1693608969758582 | 8.2466172826059054  | 9.7299606539666499  | Si70 |
| 7.0430068911211539  | 4.0555863882167120  | 17.7419070891573476 | Si71 |
| 7.0032025187816425  | 6.5614247209057455  | 22.8961027635445511 | All  |
| 7.6578559623828131  | 4.4727157075581054  | 0.5919740183734403  | H1   |
| -0.1689099567080525 | 8.9833404321411248  | 0.6211481674278694  | H2   |
| -0.1807868146905109 | 8.9756787205453854  | 26.8255124329074270 | H3   |
| 6.7122409277783994  | 4.5550198410268106  | 26.9054593782557632 | H4   |
| 6.3509266137105937  | 10.4239615018237721 | 23.8405758475596485 | H5   |
| 6.6349250805193325  | 9.6956666451898350  | 21.5264232024111237 | H6   |
| 7.7597049289451334  | 11.5874512590111234 | 23.7042331615364787 | H7   |
| 7.9810892447164550  | 9.8079642710893076  | 23.6348898903220501 | H8   |
| -5.7333621537942747 | 11.9952020263401664 | 21.2898620195140609 | H9   |
| 8.1467147085138780  | 10.8776702877173719 | 19.9712911703764071 | H10  |
| -5.2419598679981565 | 10.3028032280331310 | 21.2887331345592834 | H11  |
| 13.2816728876967414 | 1.2400048349228630  | 22.6293098645956476 | H12  |
| 4.8469708620655387  | 11.5717668957258741 | 22.2866656598832691 | H13  |
| 4.7098410663314905  | 10.5595590357405769 | 20.0244436053231780 | H14  |

---

|                     |                     |                     |     |
|---------------------|---------------------|---------------------|-----|
| 5.7448554716530182  | 11.7241667007097057 | 18.0697728905125956 | H15 |
| -0.2919020640187782 | 1.3812622264011403  | 18.4068470843726644 | H16 |
| -0.1498536670915582 | 2.4076592500807799  | 20.6754786046287862 | H17 |
| -6.0869416551717572 | 10.9850147687811095 | 21.0425085875477897 | C1  |
| 7.2574280225134729  | 10.5159539801993560 | 21.8982052453088016 | C2  |
| 7.3056107665478374  | 10.6532910940933316 | 23.3528248062145636 | C3  |
| 13.2411808112382072 | 0.7846595215335646  | 21.6379491431537900 | C4  |
| 5.3926842105932797  | 12.0325009672298577 | 21.4609170997722352 | C5  |
| 5.2600634470709817  | 11.4910558106109217 | 20.1629019598282930 | C6  |
| 5.8244479744795807  | 12.1485221149494187 | 19.0716783104101282 | C7  |
| 13.7049380975928710 | 0.8652738132827816  | 19.2649081707979377 | C8  |
| -0.6378689159195637 | 1.4396715012052095  | 20.5451950518592099 | C9  |
| Benzene             |                     |                     |     |
| 14.8747817779742277 | 15.0159289811664607 | 14.9340037495855853 | C1  |
| 14.8194535895164741 | 15.0460844130526290 | 13.5378262259756834 | C2  |
| 13.5909465638813103 | 15.2035697628956008 | 12.8905707169376491 | C3  |
| 12.4176895985957358 | 15.3309977718984332 | 13.6392709920262813 | C4  |
| 12.4729793374717879 | 15.3009849661937007 | 15.0352484767070766 | C5  |
| 13.7015495267721974 | 15.1433452685087673 | 15.6826933646248694 | C6  |
| 15.8347823972974080 | 14.8930540806239726 | 15.4398503569640653 | H1  |
| 15.7363220125607057 | 14.9465311305411479 | 12.9527926728653888 | H2  |
| 13.5477558331395116 | 15.2271353540732139 | 11.7995227630840951 | H3  |
| 11.4577874687922510 | 15.4541468345409090 | 13.1333074913551133 | H4  |
| 11.5563315601882639 | 15.4005687215114175 | 15.6204594264487433 | H5  |
| 13.7449209038101809 | 15.1199529549939022 | 16.7736512734254433 | H6  |
| Propylene           |                     |                     |     |
| 7.3129069757117131  | 7.7163855877587837  | 9.0595554973855794  | C1  |
| 8.2036246838803422  | 6.5339365652252397  | 8.8455803235819612  | C2  |
| 9.5269169028917524  | 6.5181380070259713  | 9.0312527331009083  | C3  |
| 7.7098738268751887  | 5.6156783149839065  | 8.5069396276486220  | H1  |
| 10.1184105952078607 | 5.6192007199967140  | 8.8496935523410958  | H2  |
| 10.0675666111147741 | 7.4062907031306446  | 9.3710956703608304  | H3  |
| 6.5393688608546299  | 7.5020369116306069  | 9.8161351159089012  | H4  |
| 6.7744742340085544  | 7.9763238443012581  | 8.1334034256623262  | H5  |
| 7.8813563644551934  | 8.5987590009469095  | 9.3864942640098228  | H6  |
| Cumene              |                     |                     |     |
| 8.7533491069829559  | 8.4915500955931549  | 10.3341127192483579 | C1  |
| 10.1426627166391476 | 8.4564055132997549  | 10.4684018576258850 | C2  |
| 10.7269553060124032 | 8.4103254974318524  | 11.7367060879893579 | C3  |
| 9.9082526566577407  | 8.3980644350293598  | 12.8676293793761474 | C4  |
| 8.5186389502516757  | 8.4303783114623645  | 12.7262452495180280 | C5  |
| 7.9159891194557206  | 8.4782033503602374  | 11.4606699514493027 | C6  |
| 6.4029683725275088  | 8.5472341096551077  | 11.3315773593127780 | C7  |
| 5.8441385583646737  | 7.5557903283545702  | 10.3026109051716919 | C8  |

|                     |                     |                     |     |
|---------------------|---------------------|---------------------|-----|
| 5.9419844117535350  | 9.9799535331408258  | 11.0147497806321226 | C9  |
| 8.3166925631087505  | 8.5253244679766240  | 9.3331182221656768  | H1  |
| 10.7731910229010914 | 8.4606048878484916  | 9.5763095656028216  | H2  |
| 11.8132452833379489 | 8.3810500383274658  | 11.8417217036931017 | H3  |
| 10.3532070423184255 | 8.3581405783554139  | 13.8644611293227733 | H4  |
| 7.8840246690310058  | 8.4152837159907161  | 13.6170477923687603 | H5  |
| 6.1746074241989577  | 6.5276708885748089  | 10.5111703861355110 | H6  |
| 6.1634782505072421  | 7.8120757212326559  | 9.2804796242002325  | H7  |
| 4.7438839969111068  | 7.5722409521856209  | 10.3133634489999437 | H8  |
| 5.9883024161365626  | 8.2741385937166445  | 12.3178978066124714 | H9  |
| 4.8444107648193881  | 10.0275588506561597 | 10.9416823099758300 | H10 |
| 6.2654278705949711  | 10.6874075338394672 | 11.7922356643563067 | H11 |
| 6.3602194124895375  | 10.3208375939685979 | 10.0546186652427512 | H12 |

**Table S15.** Cartesian coordinates of all the optimized intermediates for the alkylation of benzene with 1-dodecene.

| H-MWW               |                     |                     |     |
|---------------------|---------------------|---------------------|-----|
| 7.0511269792453612  | 4.2430713042060493  | 0.9107988091997012  | O1  |
| -0.0027996337905734 | 8.3426425484340481  | 0.9252122950255126  | O2  |
| 5.7888269944769721  | 3.5776009877477821  | 3.0884051843247020  | O3  |
| 1.2991199778209204  | 9.1868943119309137  | 24.0278942579153565 | O4  |
| 8.4646824791010360  | 3.4439686457529373  | 3.0548313198835553  | O5  |
| -1.3482840956980606 | 9.2895692100277074  | 24.0480410264238849 | O6  |
| 7.2577464218965551  | 5.8153550215405581  | 3.0869956075548957  | O7  |
| -0.0943833929769413 | 6.9103824998967838  | 24.0080999086065781 | O8  |
| 1.1951135105584259  | 9.3664496222266180  | 3.1119529959325356  | O9  |
| 5.9387892934369138  | 3.2004366241409272  | 24.0056691458721190 | O10 |
| -1.4473140520347831 | 9.0741422681952049  | 3.0742975355310551  | O11 |
| 8.5685808243701853  | 3.6510988910626723  | 24.0659956927381273 | O12 |
| 0.1348299629007714  | 6.9107885955026669  | 3.0965446804080865  | O13 |
| 6.8348505790340273  | 5.6965556075253430  | 24.1876117440305620 | O14 |
| 4.9518433211989930  | 1.3993879014452668  | 4.3707260591735633  | O15 |
| 2.0398026889373453  | 11.3939295802954792 | 22.7206845364311505 | O16 |
| 10.7776714524489989 | 3.7768814902915748  | 4.3351313438322601  | O17 |
| -3.6364848066561182 | 8.9502756311314293  | 22.7310256285147503 | O18 |
| 5.7896108994655053  | 7.6296269120796367  | 4.3876639777474091  | O19 |
| 1.4010407628921842  | 5.1538237790978769  | 22.6971959243988017 | O20 |
| 2.3723871500796392  | 11.2958808712965677 | 4.5100927278024354  | O21 |
| 4.5838794518099055  | 1.4122909061267281  | 22.5913593156697665 | O22 |
| -3.7262774458285270 | 9.0897785102433506  | 4.4544371965743492  | O23 |
| 10.8530690885326351 | 3.6530866411738505  | 22.6979496188574323 | O24 |
| 1.2244399561850781  | 4.9235394847462581  | 4.4966965118455251  | O25 |
| 5.8488264480217076  | 7.9986913198091241  | 22.7362092872884602 | O26 |
| -1.2361346374276778 | 4.9077274937836890  | 22.6583013046153283 | O27 |

---

|                     |                     |                     |     |
|---------------------|---------------------|---------------------|-----|
| 8.4230858949799021  | 7.7753945902719508  | 4.4533638977395436  | O28 |
| -2.4608677591822872 | 11.2911773799535524 | 22.7019824119207208 | O29 |
| 9.5630431327373326  | 1.4338863826731241  | 4.4189280487224414  | O30 |
| 3.5745314676184039  | 9.2547292279997500  | 22.6668190208976732 | O31 |
| 3.5143324019003903  | 3.6096381579454517  | 4.4727554568534140  | O32 |
| 8.5923662344872085  | 7.5642871636349920  | 22.7969136120844773 | O33 |
| -1.4056736030334940 | 5.1189160548663635  | 4.3153589463837960  | O34 |
| 9.3184801467181586  | 1.5104872536676943  | 22.6776857862904571 | O35 |
| -2.2529394133653664 | 11.2811590289891086 | 4.3285965400513486  | O36 |
| 3.7106316852011476  | 3.9057847820257665  | 22.7312305450296748 | O37 |
| 3.5060470385455584  | 8.9165344757427327  | 4.3700790921008652  | O38 |
| 5.8456408956990904  | 3.4919461581195006  | 5.7599227874270138  | O39 |
| 1.2986797530658452  | 9.2056962642667379  | 21.3411078786141921 | O40 |
| 8.5219338562586380  | 3.5059661347363744  | 5.7282134399245610  | O41 |
| -1.3642874091636870 | 9.2599764476294038  | 21.3698732932529616 | O42 |
| 7.1711256087837238  | 5.8150349463022062  | 5.7612424949871208  | O43 |
| -0.0696281848468345 | 6.9110565690846837  | 21.3352890385557181 | O44 |
| 1.2659716881167160  | 9.2311850877355486  | 5.7847095367338062  | O45 |
| 5.9106489821775083  | 3.2875441631129174  | 21.3088216453493260 | O46 |
| -1.4069023868244446 | 9.1868820402701221  | 5.7490105488571501  | O47 |
| 8.5448218228771751  | 3.7279872342524460  | 21.3822104728365261 | O48 |
| -0.0328151900038778 | 6.8936054746552671  | 5.7659636220027499  | O49 |
| 6.8260106048718274  | 5.7907026298422073  | 21.2973224468939826 | O50 |
| 7.2128367772246200  | 4.2521720178877169  | 7.8775710074469290  | O51 |
| -0.0671184299462055 | 8.4674242689395047  | 19.2124429732934026 | O52 |
| -0.0959404243819684 | 8.4367062639433321  | 7.8992185477363721  | O53 |
| 7.1802178263826253  | 4.1958902268691878  | 19.1863661017711138 | O54 |
| 5.5714264451625111  | 0.0624742030037174  | 6.5843012083759076  | O55 |
| 8.6493008551163051  | 0.1681361747706613  | 20.4790174273661805 | O56 |
| -2.8234533875329948 | 4.9847437689681025  | 6.5610281869629956  | O57 |
| -4.4465832427367626 | 7.7153289825703357  | 20.5241454170514288 | O58 |
| 4.3457930392024284  | 7.7752151443190138  | 6.6203538431027553  | O59 |
| 2.8845885554832882  | 5.0838165223277958  | 20.4885616719551287 | O60 |
| 8.9063699331713657  | 0.1870172590646109  | 6.6697076846379995  | O61 |
| 5.3304457708123749  | 0.0291882804628962  | 20.4295225475323399 | O62 |
| -4.5316559510476537 | 7.8361077453670918  | 6.6601261361283424  | O63 |
| -2.7121873088858233 | 4.7785424509679766  | 20.4616901958239019 | O64 |
| 2.7056107872137072  | 4.8123602969817805  | 6.6992399057020364  | O65 |
| 4.4699542833745740  | 8.0635520460996997  | 20.4470121560431011 | O66 |
| 7.2707108881750271  | 0.0953565510570665  | 4.5627722919343388  | O67 |
| 6.9729612195875266  | 0.2385781135887961  | 22.5206496944778713 | O68 |
| -3.7186957451758804 | 6.4317456173969676  | 4.5416090675393130  | O69 |
| -3.4750028739110466 | 6.3114314787183572  | 22.5233973267510024 | O70 |
| 3.5168136240761250  | 6.2632154415693151  | 4.6142193646505296  | O71 |

---

---

|                     |                     |                     |      |
|---------------------|---------------------|---------------------|------|
| 3.6540810322088895  | 6.5611399881106252  | 22.5279696330947772 | O72  |
| 7.1970450204242313  | 0.1010195509736544  | 8.6979266182428301  | O73  |
| 7.0170569001645005  | 0.1447652889924168  | 18.3749581745869577 | O74  |
| -3.6330150392304348 | 6.3778638096983507  | 8.6861904331288180  | O75  |
| -3.5410551753128767 | 6.2952682049945379  | 18.4430164727616699 | O76  |
| 3.5617373818154636  | 6.3160839620981752  | 8.7134091841684036  | O77  |
| 3.6287038920256380  | 6.5642691625415370  | 18.4140861668178175 | O78  |
| 4.7871744536014322  | 1.2598398410511162  | 8.7788388164366875  | O79  |
| 2.1659952099609363  | 11.4180416434979879 | 18.3106802525546186 | O80  |
| 10.9411490260350064 | 3.7017158008912565  | 8.7358113530407469  | O81  |
| -3.6682161692663238 | 8.9532133152116700  | 18.3582097022186908 | O82  |
| 5.7779715510055425  | 7.8103645671969923  | 8.8116648440143646  | O83  |
| 1.3868281144992225  | 5.1199767360123509  | 18.3469839509539447 | O84  |
| 2.3618513346881302  | 11.3927460786027357 | 8.8702787338563809  | O85  |
| 4.6779308899588745  | 1.4385535580967035  | 18.2863866621500257 | O86  |
| -3.8652002422412206 | 9.0402864083657537  | 8.9096481269174586  | O87  |
| 10.9280246545624671 | 3.6228264595353417  | 18.2262320540255196 | O88  |
| 1.3440678227125131  | 4.8354016928623063  | 8.9555416394549372  | O89  |
| 5.9258525336159318  | 7.9495649564406872  | 18.2598467940945355 | O90  |
| -1.2415074953321827 | 4.9490506239528411  | 18.2834860908842245 | O91  |
| 8.4047790962833808  | 7.5418431500123528  | 8.8130044607054057  | O92  |
| -2.5021125429724478 | 11.3105781257020190 | 18.1888630255863859 | O93  |
| 9.4493225062289259  | 1.5235639282111653  | 8.8718935110233623  | O94  |
| 3.6221639578353839  | 9.2299528599266143  | 18.2611870855231793 | O95  |
| 3.7018610394698075  | 3.6625705602787604  | 8.8527673101890230  | O96  |
| 8.5299814100982871  | 7.5195240747234617  | 18.3652797623902302 | O97  |
| -1.2669471531110603 | 5.1482652868195782  | 8.6602600166731847  | O98  |
| 9.2724151891311948  | 1.5704120993500492  | 18.3592851907329759 | O99  |
| -2.2383873042025080 | 11.1163593070362534 | 8.6783299115070243  | O100 |
| 3.7523521083252813  | 3.9066034857948604  | 18.3222968637431336 | O101 |
| 3.3950153750285921  | 8.9695976085690390  | 8.7483445130073285  | O102 |
| 6.0559698352450315  | 3.2313999239236941  | 10.0360295315322272 | O103 |
| 1.2556195061188777  | 9.2516247104291871  | 17.0450379709011095 | O104 |
| 8.6390367282575937  | 3.7646631443189364  | 10.0642562582373039 | O105 |
| -1.3757752353814996 | 9.2034143195484788  | 17.0167826105163371 | O106 |
| 6.8849468435510648  | 5.7360518514294041  | 10.0546662535272358 | O107 |
| -0.0173848388159934 | 6.9506260315594890  | 17.0233696967144645 | O108 |
| 1.1139485172781489  | 9.3777289294135144  | 10.0700655290805035 | O109 |
| 5.9755541513246984  | 3.3605434003797439  | 16.9695128565202715 | O110 |
| -1.4932077334696476 | 8.9916303514984168  | 10.0986191422472391 | O111 |
| 8.5883816119936540  | 3.7423945567499914  | 16.9745618703062391 | O112 |
| 0.1436830322121438  | 6.9245683359326069  | 10.0691046784719020 | O113 |
| 6.9484053706399482  | 5.8111601132816100  | 17.0672242145792588 | O114 |
| 3.9163851185047656  | 2.2071511269434358  | 11.0886688699864511 | O115 |

---

---

|                     |                     |                     |      |
|---------------------|---------------------|---------------------|------|
| 3.2126754119476386  | 10.6220638688462543 | 16.0204236067495600 | O116 |
| 10.6683349682473114 | 2.4698384416065688  | 11.0557408440395282 | O117 |
| -3.5648812177178768 | 10.1813994557443106 | 16.0191816287458835 | O118 |
| 7.1039586959485721  | 8.1123960883082376  | 11.0823087498259696 | O119 |
| 0.1959225381005023  | 4.5388080191340023  | 16.0643965886519595 | O120 |
| 3.3509437736975185  | 10.2512355972883569 | 11.0716574605486535 | O121 |
| 3.6585714230566380  | 2.5323393565865833  | 16.0711237625343557 | O122 |
| -3.3542579050065462 | 10.5866525617944696 | 11.0220067484853050 | O123 |
| 10.4472844215626601 | 2.1281120931330353  | 16.0616005164628390 | O124 |
| -0.2867131577032405 | 4.5438744880176740  | 11.0465076012345236 | O125 |
| 7.4165548432180319  | 8.1919203823766491  | 16.0614425308517177 | O126 |
| 2.3519958509628149  | 0.1488920403816746  | 11.7535816629850220 | O127 |
| 12.0502044372248278 | 0.1198354583473828  | 15.3311904928886999 | O128 |
| -1.2192258213883349 | 2.1774563219934535  | 11.8088721410699016 | O129 |
| -6.0925218315359446 | 10.5801348546124654 | 15.2953503990077451 | O130 |
| 5.9228249531465762  | 10.4238251704169631 | 11.6912544073206117 | O131 |
| 1.1293768437261360  | 2.1583402838261607  | 15.3193872195633567 | O132 |
| 11.6453762287868265 | 0.0934059421398786  | 11.6274092198988210 | O133 |
| 2.7808946635242577  | 0.1154540108336954  | 15.4874241738001981 | O134 |
| -5.8959403302427429 | 10.2386141220874709 | 11.6529306043714094 | O135 |
| -1.4620734317438653 | 2.5814856214915012  | 15.4642561725836565 | O136 |
| 1.3751229815934114  | 2.5852452201194565  | 11.6406352668404232 | O137 |
| 5.7541311820384093  | 10.1574167139015650 | 15.5000765141982662 | O138 |
| 3.1256448509483530  | 1.9489310955541559  | 13.5673794790203761 | O139 |
| 4.0388130068260599  | 10.7865242064931053 | 13.5484671140372850 | O140 |
| 11.2135106500830801 | 1.9139061300140687  | 13.5541786116054368 | O141 |
| -4.0923935929206046 | 10.8186607942978359 | 13.5347254753791262 | O142 |
| 7.1506246446021020  | 8.9548617359662686  | 13.5574095066393827 | O143 |
| -0.0319221818675888 | 3.8013893253189490  | 13.5594286819875389 | O144 |
| -0.0444121069718895 | 8.3254485417636808  | 26.1963011634219036 | O145 |
| 7.1947199292710771  | 3.9619085201942603  | 26.2535836691478330 | O146 |
| 5.0278440639190833  | 3.0205980421205090  | 4.4152652742753995  | Si1  |
| 2.0177576248655438  | 9.7788889764170168  | 22.6978703359576564 | Si2  |
| 9.3292043162026683  | 3.0424773537086574  | 4.3765158652364615  | Si3  |
| -2.2037519184185479 | 9.6891873679023313  | 22.7166932914151225 | Si4  |
| 7.1577444739926213  | 6.7552949338906156  | 4.4144394910349938  | Si5  |
| -0.0065248060929655 | 5.9692756884182883  | 22.6814945744713974 | Si6  |
| 2.0838961553226349  | 9.6970437902753375  | 4.4379813110004251  | Si7  |
| 5.0485074775570107  | 2.9758605451888096  | 22.6688243329608952 | Si8  |
| -2.2041228963712847 | 9.6587177991671282  | 4.3944018662958388  | Si9  |
| 9.3050961307821325  | 3.1404469276016842  | 22.7125762053289542 | Si10 |
| -0.0216655039716560 | 5.9637720141231227  | 4.4119761408519294  | Si11 |
| 4.6041178719068032  | 2.5987357121319539  | 9.6783950162217902  | Si12 |
| 2.5653075571518258  | 10.1295066822684454 | 17.4171631717728062 | Si13 |

---

---

|                     |                     |                     |      |
|---------------------|---------------------|---------------------|------|
| 9.9243467200923661  | 2.8509541255749911  | 9.6718025235940761  | Si14 |
| -2.7787174525948570 | 9.9177573663225083  | 17.4094700458532365 | Si15 |
| 7.0538235250572034  | 7.3080861112170785  | 9.6802571032602245  | Si16 |
| 0.0693025643963670  | 5.3840094953182680  | 17.4376204017001548 | Si17 |
| 2.5619748417102395  | 10.0006201137276776 | 9.6805848908417467  | Si18 |
| 4.5171136061421029  | 2.7996661602067774  | 17.4174104895054960 | Si19 |
| -2.7450445591840298 | 9.9365971076196367  | 9.6702926320944247  | Si20 |
| 9.8162352561524084  | 2.7687220760028373  | 17.4110164996998478 | Si21 |
| -0.0149953392119628 | 5.3576329486337722  | 9.6722135954722361  | Si22 |
| 7.2098712287177662  | 7.3687459416405749  | 17.4440952205068882 | Si23 |
| 2.6904604656999709  | 1.7163703283344909  | 12.0159626110130180 | Si24 |
| 4.4640169311471922  | 11.0531987899053039 | 15.0957206909167940 | Si25 |
| 11.6864560396917163 | 1.6657230277954282  | 12.0149419462781744 | Si26 |
| -4.5498378622796025 | 11.0491269534511893 | 15.0807430307157144 | Si27 |
| 7.1743631974188133  | 9.4369767244272893  | 12.0019349847405543 | Si28 |
| -0.0397740158429454 | 3.2672753744324639  | 15.0986506619841983 | Si29 |
| 4.4400633032306756  | 11.0139510011387944 | 11.9886555314131549 | Si30 |
| 2.6726854193614971  | 1.6887484898778913  | 15.1093581218471957 | Si31 |
| -4.5512791075293517 | 11.0724707158031368 | 11.9931638594060477 | Si32 |
| 11.6698895963157465 | 1.6859326809799886  | 15.1015119706997005 | Si33 |
| -0.0409882049773669 | 3.2760488239348229  | 12.0173707100232097 | Si34 |
| 7.1689341443256778  | 9.4701001715012918  | 15.1018587306647056 | Si35 |
| 5.6924719181102370  | 0.0845759384037610  | 4.9739857669609586  | Si36 |
| 8.5415250872517561  | 0.2187326588399282  | 22.0887382531594803 | Si37 |
| -2.9017488932038162 | 5.0802698591475393  | 4.9505034193799196  | Si38 |
| -4.3803052816414390 | 7.6216774812734842  | 22.1450985492295693 | Si39 |
| 4.2875083073380535  | 7.6430155541481337  | 5.0105419477673498  | Si40 |
| 2.9085826670793913  | 5.1546588427598357  | 22.0978766440865435 | Si41 |
| 8.8269270450968964  | 0.1281020340016939  | 5.0545967158888008  | Si42 |
| 5.4144960067381973  | 0.1227042133168886  | 22.0436374577337837 | Si43 |
| -4.4929058024928725 | 7.7789072847410150  | 5.0430223510550762  | Si44 |
| -2.7657183913691714 | 4.9180166776201846  | 22.0760645908460518 | Si45 |
| 2.7431846550499697  | 4.9064749024387426  | 5.0835067326487131  | Si46 |
| 4.2939719686884672  | 7.9508109612883837  | 22.0319300505114093 | Si47 |
| 5.6435747200134596  | 0.0131084580532875  | 8.1970920255152038  | Si48 |
| 8.5724018908924222  | 0.2047984531701634  | 18.8667636380932393 | Si49 |
| -2.8108507343657148 | 5.0603800634029508  | 8.1743740202037927  | Si50 |
| -4.3838503014723207 | 7.6123170482260578  | 18.9197422022749606 | Si51 |
| 4.2677773637804712  | 7.7080492832378580  | 8.2330726597945105  | Si52 |
| 2.9129563184387668  | 5.1681501943216643  | 18.8743690389345637 | Si53 |
| 8.7764263572871517  | 0.1737079730648523  | 8.2827893959716334  | Si54 |
| 5.4441498057669078  | 0.1116051934312817  | 18.8190432202630298 | Si55 |
| -4.5094085523253851 | 7.6947934615284330  | 8.2725432343837948  | Si56 |
| -2.7605927394271523 | 4.9202587052712721  | 18.8530605426608240 | Si57 |

---



|                     |                     |                     |      |
|---------------------|---------------------|---------------------|------|
| 2.8293187527642627  | 4.9135221043612836  | 8.3095898693245065  | Si58 |
| 4.4099708977981775  | 7.9342837805565543  | 18.8199941477414185 | Si59 |
| 7.1524394638414321  | 4.2767563551609058  | 2.5325560198587502  | Si60 |
| -0.0577373193770674 | 8.4365726416464568  | 24.5755996846563143 | Si61 |
| -0.0314398275222052 | 8.4366596768573388  | 2.5473830566264763  | Si62 |
| 7.1172724772497418  | 4.1691422115037309  | 24.6353738454019755 | Si63 |
| 7.1865733925838367  | 4.2664238574480846  | 6.2736464417469104  | Si64 |
| -0.0615085079390667 | 8.4575173163209652  | 20.8180587315381196 | Si65 |
| -0.0657440405743159 | 8.4368136648777909  | 6.2938669703175671  | Si66 |
| 7.1120936943863358  | 4.2847713304831156  | 20.8004175360737058 | Si67 |
| 7.1980295086161856  | 4.2463742168384648  | 9.5036970171839812  | Si68 |
| -0.0530706395277001 | 8.4679836964377220  | 17.5833866011202993 | Si69 |
| -0.0830177602193274 | 8.4330156142629757  | 9.5267249760980661  | Si70 |
| 7.1743636164217861  | 4.2823228005531213  | 17.5658090922376822 | Si71 |
| 7.1555520442581715  | 6.6304822510787353  | 22.7790802487139636 | All  |
| 7.7673800994764708  | 4.6412251060284850  | 0.3932070242299976  | H1   |
| -0.0509189252525211 | 9.1626249967659543  | 0.4107643859890184  | H2   |
| -0.2568451305991610 | 9.1152034803045119  | 26.7163126711693053 | H3   |
| 6.4747416919820875  | 4.3336201597025799  | 26.7853942756796854 | H4   |
| 6.1679946472153180  | 8.8807657830825200  | 23.0035374858163841 | H5   |
| Adsorbed 1-dodecene |                     |                     |      |
| 6.9929765991009125  | 4.1097929960224482  | 0.8983037773559899  | O1   |
| -0.0943758639267482 | 8.2219568516985433  | 0.9195294701289864  | O2   |
| 5.7388881212982188  | 3.3984205515881221  | 3.0638070976377243  | O3   |
| 1.1919211290016918  | 9.0089419688133905  | 23.9591139988042059 | O4   |
| 8.4168737128035822  | 3.3368566559894126  | 3.0460668970343492  | O5   |
| -1.4600019794140637 | 9.0653798248789830  | 23.9763479489119931 | O6   |
| 7.1536741042017429  | 5.6776280203934419  | 3.0803799766100006  | O7   |
| -0.1718935326525997 | 6.7073635777803871  | 23.9089450915500166 | O8   |
| 1.0851256791277670  | 9.2683725259201886  | 3.1035659948017691  | O9   |
| 5.8890489177715981  | 2.9880026798062076  | 23.8849219308779368 | O10  |
| -1.5495806772874055 | 8.9197906054686413  | 3.0752471041526306  | O11  |
| 8.4914063153867936  | 3.5409276759326573  | 23.9618243098797699 | O12  |
| 0.0658846393018480  | 6.7883285724705216  | 3.0898309230246208  | O13  |
| 6.6713846683638920  | 5.5254483068573323  | 24.1012059294577270 | O14  |
| 4.8662301241035557  | 1.2502478847134750  | 4.3820919358497372  | O15  |
| 2.0212063340041082  | 11.2151591719519761 | 22.6997456138298332 | O16  |
| 10.7115631999181389 | 3.6713685078378013  | 4.3611741127936758  | O17  |
| -3.7913861559938584 | 8.7821927976035834  | 22.7074667507425580 | O18  |
| 5.6970643534224719  | 7.5150440529890297  | 4.3557211247618470  | O19  |
| 1.3195398711871476  | 4.9100412408978045  | 22.6424492988221431 | O20  |
| 2.3033688250974844  | 11.1910681828333836 | 4.4815931680361096  | O21  |
| 4.5411961986137142  | 1.1767097692483763  | 22.4970219437520278 | O22  |
| -3.8203991215804001 | 8.9765822687198931  | 4.4668918692009152  | O23  |

---

|                     |                     |                     |     |
|---------------------|---------------------|---------------------|-----|
| 10.7687078608831737 | 3.4959754006800066  | 22.5784834928977283 | O24 |
| 1.1485305387359519  | 4.7751529119993474  | 4.4526624014695635  | O25 |
| 5.7406261551531772  | 7.8044982742830644  | 22.5240317978534534 | O26 |
| -1.3199335035693420 | 4.7404771330675377  | 22.5178042012521757 | O27 |
| 8.3322775014819328  | 7.6437969173118905  | 4.4358037286520773  | O28 |
| -2.5061513366860089 | 11.0667779920316871 | 22.5872346693518402 | O29 |
| 9.4962947647322888  | 1.3282493361488548  | 4.4247082262172723  | O30 |
| 3.4282106220707957  | 8.9978105586215769  | 22.5358423558060821 | O31 |
| 3.4450420951035468  | 3.4739450859794361  | 4.4163098784690504  | O32 |
| 8.4833961038253314  | 7.3263356599120391  | 22.7403325420738476 | O33 |
| -1.4816751870992271 | 5.0300826573513335  | 4.3593951417837422  | O34 |
| 9.2417473409225011  | 1.3369135892320709  | 22.6681929257078245 | O35 |
| -2.2951836924622953 | 11.1317748747277356 | 4.3491567043856882  | O36 |
| 3.6302215357761067  | 3.6587456324573902  | 22.6386955491086610 | O37 |
| 3.3992390229860963  | 8.7866556723451978  | 4.3340470509604581  | O38 |
| 5.7587913594197708  | 3.3631196288848670  | 5.7336524694434798  | O39 |
| 1.1044255124562845  | 9.1395314449624099  | 21.2780702108215536 | O40 |
| 8.4358509489890992  | 3.4018484062113896  | 5.7193675811494886  | O41 |
| -1.5477164125241734 | 8.9293212089626373  | 21.3002255465223733 | O42 |
| 7.0619569205425776  | 5.6992818358401012  | 5.7505482725967108  | O43 |
| -0.0349754837945633 | 6.7177427363888684  | 21.2407414685227671 | O44 |
| 1.1753138696884511  | 9.1628172862652928  | 5.7739922024714465  | O45 |
| 5.8199771070517805  | 3.0577025275721113  | 21.1888062370580208 | O46 |
| -1.4946556854532935 | 8.9994119437395810  | 5.7507675127882436  | O47 |
| 8.4554958774198727  | 3.4846667783687488  | 21.2778547402189133 | O48 |
| -0.0164957077291006 | 6.7710304482593058  | 5.7616886991302918  | O49 |
| 6.7416296288156765  | 5.5583810616395599  | 21.2161639239987032 | O50 |
| 7.1001149335367142  | 4.1242250742752953  | 7.8574689117248724  | O51 |
| -0.1743489270923462 | 8.3054453546696561  | 19.1429573279543987 | O52 |
| -0.1348242865903746 | 8.3085842510346541  | 7.8944052025903586  | O53 |
| 7.1056213478709385  | 4.0003501043957774  | 19.0949655322432257 | O54 |
| -1.7335515298317876 | 12.4163501221514405 | 6.6036372868478077  | O55 |
| 8.7334503896592413  | -0.0150474451131146 | 20.4307146708170819 | O56 |
| 11.5250093643316482 | 4.8512865840461687  | 6.6003438159324945  | O57 |
| 9.8397309793135950  | 7.6155773849340394  | 20.4586839749979568 | O58 |
| 4.2415963149902121  | 7.6365304318255980  | 6.5770542136369379  | O59 |
| 2.7495587428311428  | 4.8222013919131852  | 20.4058309258334383 | O60 |
| 8.8722703249013968  | 0.0533934953420734  | 6.6708244965486498  | O61 |
| -1.9642427028854019 | 12.3162859260075237 | 20.3134863434072805 | O62 |
| 9.7675153030763688  | 7.7555417378193576  | 6.6695526297001662  | O63 |
| 11.6194803853634099 | 4.6234131262504317  | 20.3328611276710802 | O64 |
| 2.6384122513670234  | 4.6651668486595019  | 6.6501266990790100  | O65 |
| 4.2586898726087625  | 7.8192230700116925  | 20.2957830962762813 | O66 |
| -0.0140191225398176 | 12.4926072702459265 | 4.5928208302662714  | O67 |

---

---

|                     |                     |                     |      |
|---------------------|---------------------|---------------------|------|
| 6.9354364101081147  | 0.0043143437882609  | 22.3755222212211429 | O68  |
| 10.6321995308147290 | 6.3220744027197160  | 4.5916893583225429  | O69  |
| -3.5485398772306564 | 6.1600526845751293  | 22.3939322791679629 | O70  |
| 3.4341514524616779  | 6.1284240287860543  | 4.5644439386327438  | O71  |
| 3.5712301503497388  | 6.3142279544528215  | 22.4148475335206960 | O72  |
| 7.1422527825228554  | -0.0030969215728514 | 8.6880849424039326  | O73  |
| -0.1667161750378545 | 12.4771548145823576 | 18.3534639425010049 | O74  |
| 10.6635007985934287 | 6.2748159983052059  | 8.6845549826619326  | O75  |
| 10.7125022666582481 | 6.1812354283457918  | 18.3722310813188798 | O76  |
| 3.4546544241152128  | 6.1836734420102974  | 8.6705752793615769  | O77  |
| 3.4951217619699757  | 6.2473832336642996  | 18.2884817122174717 | O78  |
| 4.7132544937000604  | 1.1114894783132405  | 8.8032711304501525  | O79  |
| 2.2407597749009360  | 11.3250763553374441 | 18.2071922228615541 | O80  |
| 10.9029162708429794 | 3.6161762368441908  | 8.8263860665789515  | O81  |
| -3.9271547446908497 | 8.8451955073732975  | 18.2478656467689326 | O82  |
| 5.6411143646688178  | 7.7231006037741228  | 8.7855059328469380  | O83  |
| 1.3041255211523399  | 4.7110329087347909  | 18.2268249825127953 | O84  |
| 2.3212414358448035  | 11.3245190007592509 | 8.9086139047265362  | O85  |
| 4.6490420886904209  | 1.1186977067729120  | 18.0885723101677272 | O86  |
| -3.9560194107122149 | 8.9353472437089145  | 8.9193479731240952  | O87  |
| 10.9154302231576672 | 3.5311229822584265  | 18.0411348234523068 | O88  |
| 1.2497848108076921  | 4.6787796852482115  | 8.8951191454140108  | O89  |
| 5.7059212904966019  | 7.7524775092039064  | 18.0916730100754535 | O90  |
| -1.3351561756395127 | 5.0075942621379639  | 18.1890589849423634 | O91  |
| 8.2808790484877761  | 7.4666676284833855  | 8.8184742575255992  | O92  |
| -2.3572992134925301 | 10.9843921273681300 | 18.0960933013710061 | O93  |
| 9.3627965079133748  | 1.4630567604081153  | 8.8328119932406608  | O94  |
| 3.3189144835892037  | 8.9032559426427884  | 18.1136812599654391 | O95  |
| 3.6263846419995645  | 3.5271141625976625  | 8.8060781038633102  | O96  |
| 8.3147706995844857  | 7.3464862884996931  | 18.3510814674764440 | O97  |
| -1.3566098807335085 | 5.1384139039788881  | 8.6832101202041940  | O98  |
| 9.2576109749230255  | 1.4772289719638663  | 18.3524029539762061 | O99  |
| -2.2568188917160557 | 10.9670731165824513 | 8.7166526476275941  | O100 |
| 3.7175461897844171  | 3.5881815949728528  | 18.3223241150179881 | O101 |
| 3.2284889072420970  | 8.8405931760346679  | 8.6584507568166789  | O102 |
| 5.9622311338529794  | 3.1133581824321745  | 10.0299333273154847 | O103 |
| 0.9487415269422197  | 9.3489082489371658  | 16.9773159190242957 | O104 |
| 8.5373420060334730  | 3.6978587545996104  | 10.0416484895241087 | O105 |
| -1.6116494300116564 | 8.7002893167930289  | 16.9477024561052723 | O106 |
| 6.7428006713761874  | 5.6342065413349101  | 10.0060573569955551 | O107 |
| 0.2326018549961173  | 6.8058681124522051  | 16.9929885787985704 | O108 |
| 1.0155367006531799  | 9.3212633539871934  | 10.0622370832141463 | O109 |
| 5.9207669500912408  | 3.1313647133803388  | 16.8901671623322045 | O110 |
| -1.5717055163306073 | 8.7828784669352089  | 10.0772865608188074 | O111 |

---

---

|                     |                     |                     |      |
|---------------------|---------------------|---------------------|------|
| 8.5214897963508474  | 3.5934833454860171  | 16.8929958251739478 | O112 |
| 0.1869054159851751  | 6.8100469454186614  | 10.0659926877116117 | O113 |
| 6.8181111047186738  | 5.6115263549863270  | 16.9817258180084103 | O114 |
| 3.8001324593996921  | 2.1153985262069446  | 11.0689743522990618 | O115 |
| 3.0928678169696600  | 10.3671318140796949 | 15.8998976315882210 | O116 |
| 10.4764920174650911 | 2.3344439388792306  | 11.0985140263743620 | O117 |
| -3.5855530881354785 | 10.0565102595073075 | 15.9236373699644371 | O118 |
| 6.9380631056540230  | 7.9917866424750992  | 11.0680677322083127 | O119 |
| 0.0073844732184223  | 4.4347727516217974  | 15.9473374822809841 | O120 |
| 3.3486350710434083  | 10.0418322792093218 | 11.0097302899960887 | O121 |
| 3.5941233467523057  | 2.3767851544742369  | 15.9808863728483121 | O122 |
| -3.3681384628466269 | 10.4176680667667210 | 11.0560912785599221 | O123 |
| 10.3304572012793514 | 1.9365956783911313  | 15.9851758048634487 | O124 |
| -0.3425690063114653 | 4.4273349232184476  | 11.0222220118752556 | O125 |
| 7.3157250754980074  | 7.9826783207752978  | 15.9803227858329198 | O126 |
| 2.2776151434500034  | -0.0100314532598587 | 11.6097272909370677 | O127 |
| 4.7184058237337840  | 12.4139442513573819 | 15.3428686982257130 | O128 |
| 13.0730673267242743 | 2.0447834020912521  | 11.6318229375935527 | O129 |
| 8.2652841685990275  | 10.3933208720176324 | 15.3535354692412831 | O130 |
| 5.9098065785629466  | 10.3842804296266618 | 11.6475681416622212 | O131 |
| 1.0441633807094384  | 2.0579001969255777  | 15.3027297040143022 | O132 |
| 4.2834157083537230  | 12.4482906880678001 | 11.5338448841651804 | O133 |
| -4.5791109356905260 | 12.4707426012605378 | 15.5089171683621405 | O134 |
| 8.5018210768604554  | 10.0505867556368464 | 11.5468936285629322 | O135 |
| 12.8845159730532721 | 2.3632330472748881  | 15.4941201094116376 | O136 |
| 1.2431819621409204  | 2.4032099605733666  | 11.5997306833066443 | O137 |
| 5.6640466427909004  | 9.9712642744575213  | 15.4729068951512758 | O138 |
| 2.9858435028684998  | 1.7221652880280298  | 13.5151996060572284 | O139 |
| 4.0004319960532246  | 10.6359570043523419 | 13.4791201636511406 | O140 |
| 11.2056762214579262 | 1.7151619972322523  | 13.5210861744570980 | O141 |
| -4.2588346227450211 | 10.7366420170579051 | 13.5032174633707207 | O142 |
| 7.1039197481882361  | 8.8719829911695349  | 13.5105240801993567 | O143 |
| -0.2288998927202128 | 3.5687371171204059  | 13.5000383584658703 | O144 |
| -0.1379110601711977 | 8.0964477256123253  | 26.1114962146110656 | O145 |
| 7.0931598548576069  | 3.7888470032904911  | 26.1479910881356297 | O146 |
| 4.9543645589601937  | 2.8716788160302009  | 4.3896073073938986  | Si1  |
| 1.9091941099585377  | 9.5997103870715428  | 22.6251120378933095 | Si2  |
| 9.2628749677577105  | 2.9370774959428134  | 4.3804083817025754  | Si3  |
| -2.3241710663252695 | 9.4571392671245249  | 22.6472291443712628 | Si4  |
| 7.0598219479997502  | 6.6315512857641856  | 4.3982797985911812  | Si5  |
| -0.0625919764460670 | 5.7666332760099772  | 22.5830901734700120 | Si6  |
| 1.9932639675275476  | 9.5956797991863372  | 4.4173805971423352  | Si7  |
| 4.9811003943706842  | 2.7477859110727327  | 22.5626072378685336 | Si8  |
| -2.2845178372489605 | 9.5093993651723618  | 4.4050704269985630  | Si9  |

---

---

|                     |                     |                     |      |
|---------------------|---------------------|---------------------|------|
| 9.2245878772390988  | 2.9695783568768572  | 22.6293819600947117 | Si10 |
| -0.0773195390225081 | 5.8425565077499781  | 4.4084352637408148  | Si11 |
| 4.5142794515611842  | 2.4742214802321754  | 9.6634990411012183  | Si12 |
| 2.4067005625675968  | 9.9815251974934256  | 17.3119511929486976 | Si13 |
| 9.8188366241402889  | 2.7655029657663115  | 9.6857097184654943  | Si14 |
| -2.8728684689772086 | 9.6586234415995982  | 17.3203175218258494 | Si15 |
| 6.9138953939510115  | 7.2098773483677192  | 9.6536245451442415  | Si16 |
| 0.0355608818245972  | 5.2323451088955846  | 17.3538363008212002 | Si17 |
| 2.4831512162367204  | 9.8877647967926716  | 9.6491902085556269  | Si18 |
| 4.4718251069818518  | 2.5449217665864827  | 17.3317430688865386 | Si19 |
| -2.7953870173074953 | 9.7790184050416240  | 9.6817922882496017  | Si20 |
| 9.7606464871459711  | 2.6372705254764792  | 17.3316999390805435 | Si21 |
| -0.0640801296313280 | 5.2550284652184382  | 9.6578978563655991  | Si22 |
| 7.0433116586180091  | 7.1735866545261446  | 17.3612898068588990 | Si23 |
| 2.5737225621887392  | 1.5516083758700898  | 11.9528837205162297 | Si24 |
| 4.3729691044845387  | 10.8541236886681656 | 15.0444270568137242 | Si25 |
| 11.5713832940356376 | 1.5123287112929220  | 11.9523256238674378 | Si26 |
| -4.6536785706244137 | 10.9116444019386112 | 15.0686522047584823 | Si27 |
| 7.1083367029497415  | 9.3306560557587357  | 11.9510053673049370 | Si28 |
| -0.1742090130397578 | 3.1021159218797516  | 15.0564147173698437 | Si29 |
| 4.3875418719769410  | 10.8793130940229847 | 11.9210949468580054 | Si30 |
| 2.5622402430646698  | 1.5310954881278944  | 15.0722851202333423 | Si31 |
| -4.6269785334610045 | 10.9276216827512123 | 11.9339489042733380 | Si32 |
| 11.5893897318763042 | 1.4812882614260778  | 15.0817615264353684 | Si33 |
| -0.1723375016699182 | 3.1089807535001328  | 11.9423324338073069 | Si34 |
| 7.0895987542882057  | 9.3053667061004699  | 15.0768509958413528 | Si35 |
| -1.5935426475290564 | 12.4478689043947064 | 4.9946677234830457  | Si36 |
| 8.5258006158797581  | 0.0288720442917366  | 22.0324813965563067 | Si37 |
| 11.4560039225401979 | 4.9735650702146188  | 4.9909185682709181  | Si38 |
| 9.9287720212833825  | 7.4503784621690441  | 22.0745892919780289 | Si39 |
| 4.1897474931617538  | 7.5146451266001062  | 4.9679703883889790  | Si40 |
| 2.8185098641087851  | 4.9075805677663862  | 22.0134877672528937 | Si41 |
| 8.7671544171162505  | 0.0170051208358142  | 5.0567537503161741  | Si42 |
| -1.8474400329960305 | 12.3959397045724007 | 21.9262870056959969 | Si43 |
| 9.8382394032546827  | 7.6700782326045909  | 5.0554055764415899  | Si44 |
| 11.5803229425331651 | 4.7607218705085677  | 21.9480671038750650 | Si45 |
| 2.6703635666374899  | 4.7652201516085881  | 5.0344878236572281  | Si46 |
| 4.1787355230891903  | 7.7129369604690252  | 21.8930169607580645 | Si47 |
| -1.6329812403018549 | 12.3760011156597969 | 8.2157216875497472  | Si48 |
| 8.6107496903050809  | 0.0677826294938157  | 18.8217685416741425 | Si49 |
| 11.5347486371944363 | 4.9766466353806074  | 8.2112549900004375  | Si50 |
| 9.8524527656783558  | 7.4860207557021070  | 18.8542896246955110 | Si51 |
| 4.1400229110143085  | 7.5857626923867034  | 8.1873804596494733  | Si52 |
| 2.8174356776559639  | 4.8465924179575666  | 18.7923198627770383 | Si53 |

---

---

|                     |                     |                     |      |
|---------------------|---------------------|---------------------|------|
| 8.7221263363568475  | 0.0808873446852989  | 8.2817095984921014  | Si54 |
| -1.7561434977162964 | 12.3572873585593275 | 18.7100456790341738 | Si55 |
| 9.8033762989560298  | 7.6036613037965877  | 8.2802472496640256  | Si56 |
| 11.5768562312138883 | 4.8430751371631260  | 18.7316980737865713 | Si57 |
| 2.7424426146234229  | 4.7713183186499935  | 8.2612915235356539  | Si58 |
| 4.1974454647974309  | 7.6666544629976965  | 18.6741013136738729 | Si59 |
| 7.0863073105476690  | 4.1384804322694926  | 2.5206117325993640  | Si60 |
| -0.1536141983970154 | 8.2278970819226327  | 24.4910477845877850 | Si61 |
| -0.1229800312017062 | 8.3126445832692095  | 2.5418896922836463  | Si62 |
| 7.0184002853238496  | 4.0060047981644278  | 24.5286588869575048 | Si63 |
| 7.0888734722614624  | 4.1479371034825387  | 6.2549785039237973  | Si64 |
| -0.1712545265920822 | 8.2662174921470228  | 20.7454601405959025 | Si65 |
| -0.1171411737854493 | 8.3111790766242652  | 6.2898545446591472  | Si66 |
| 7.0274596588948572  | 4.0618904142849255  | 20.7072221678324304 | Si67 |
| 7.0850668109524131  | 4.1426894157516818  | 9.4817857515739394  | Si68 |
| -0.1522432478038365 | 8.2890521710111891  | 17.5160017350621295 | Si69 |
| -0.1258532274272950 | 8.3050974876065329  | 9.5211085001184852  | Si70 |
| 7.0914391444229672  | 4.0906561636905874  | 17.4793816502440968 | Si71 |
| 7.0105189962133379  | 6.4477669729620564  | 22.6806739598459437 | Al1  |
| 7.6923173964852740  | 4.5443927099898795  | 0.3870898383830924  | H1   |
| -0.1156125011332145 | 9.0460774895985789  | 0.4098796260725821  | H2   |
| -0.2632872494659617 | 8.8998988266190171  | 26.6386844350950796 | H3   |
| 6.4321471319435819  | 4.2549942855296923  | 26.6821894656083778 | H4   |
| 6.1043809972341760  | 8.7434287204615959  | 22.6779286621283873 | H5   |
| 7.9846402433808201  | 9.9580194872631758  | 23.9349641002861375 | H6   |
| 6.2589163803905716  | 8.8881962697163104  | 25.4021359889216534 | H7   |
| 5.0002379881486290  | 9.9755173794504692  | 24.7797356910595106 | H8   |
| 6.1592049452032667  | 11.9242360352527417 | 25.8423969258484547 | H9   |
| 7.4349621646722062  | 10.8639953247680250 | 26.4481551731739053 | H10  |
| 5.7927610288620137  | 9.6182808436180682  | 27.8483643859662209 | H11  |
| 4.4591871649848445  | 10.5558829924905329 | 27.1673954319520625 | H12  |
| 6.7865352761812945  | 11.7574596264541942 | 28.7789848078399011 | H13  |
| 12.6457830637669080 | 0.1609109784178533  | 28.1069595112119188 | H14  |
| 5.2263551362258740  | 10.4742105825797900 | 30.2597230262356192 | H15  |
| 3.8428230213812942  | 11.3132430340503110 | 29.5529703320668062 | H16  |
| 11.9714035078942285 | 1.0117674051811272  | 30.3512242685552494 | H17  |
| 13.3637418808609088 | 0.1901276903583028  | 31.0529228343477826 | H18  |
| 4.6286575375527157  | 11.4272406293118056 | 32.6083748279982046 | H19  |
| 3.2259428993017787  | 12.2211440944239023 | 31.8904696200245859 | H20  |
| 12.7450692275391599 | 1.1715493660563061  | 33.3221647337537448 | H21  |
| 11.3451140320230586 | 1.9627171528418688  | 32.5999915792960593 | H22  |
| 4.0154713544986409  | 12.4370477443017524 | 34.9066892238172386 | H23  |
| 9.8289986505149649  | 0.7191012632310084  | 34.1793476560592566 | H24  |
| 10.5138981317430282 | 1.9183067837223173  | 36.2857545906427177 | H25  |

---

|                     |                     |                     |     |
|---------------------|---------------------|---------------------|-----|
| 10.7216313695845944 | 2.9847144306814055  | 34.8773235266613781 | H26 |
| 5.4148545955429448  | 10.9611305495002149 | 22.5414186446618920 | H27 |
| 7.1471760513667890  | 10.8885616010168516 | 21.8472448701847668 | H28 |
| 12.1341315739895546 | 2.1982035058627956  | 35.6105858759759926 | H29 |
| 6.4672276015589860  | 10.6926262152409297 | 22.6789268089352483 | C1  |
| 6.9162407972539981  | 10.1880831763606743 | 23.8432983869146575 | C2  |
| 6.0685754596836468  | 9.9182805208163511  | 25.0479201531588522 | C3  |
| 6.3608583535854004  | 10.8981970449036840 | 26.1952012434262294 | C4  |
| 5.5274412922104945  | 10.6127100052624623 | 27.4455053025715223 | C5  |
| 5.7134883397956386  | 11.6777308664466890 | 28.5250511874028732 | C6  |
| 4.9128738145373836  | 11.4313477518114865 | 29.8039907526588408 | C7  |
| 12.2909107968774922 | 0.0628465513644687  | 30.8198788280394993 | C8  |
| 4.2976704667821384  | 12.3623048456556113 | 32.1207781581351242 | C9  |
| 11.6722768941104640 | 1.0300268427066734  | 33.0951443256987972 | C10 |
| 10.9007489240842013 | 0.8633349396978809  | 34.4043700533189636 | C11 |
| 11.0740781238473822 | 2.0528963570049799  | 35.3481308188758092 | C12 |

TS1

|                     |                     |                     |     |
|---------------------|---------------------|---------------------|-----|
| 6.9938907578281020  | 4.1070932362477368  | 0.8960985647320817  | O1  |
| -0.1058999177596869 | 8.2216059651424107  | 0.9158145925408550  | O2  |
| 5.7362999757562507  | 3.3939243455183394  | 3.0595030656864481  | O3  |
| 1.2246679665458373  | 8.9885189819938631  | 23.9970751846827106 | O4  |
| 8.4154386021854499  | 3.3386358369687903  | 3.0457599623193703  | O5  |
| -1.4244142914097018 | 9.1013509491803610  | 23.9513607796775858 | O6  |
| 7.1465948529875511  | 5.6766749025732866  | 3.0766336430624710  | O7  |
| -0.1787586385134485 | 6.7102981895694738  | 23.9484913833343676 | O8  |
| 1.0822218162228801  | 9.2588822535587365  | 3.0980482856732929  | O9  |
| 5.8561427322509978  | 3.0500580661396373  | 23.9282735616496822 | O10 |
| -1.5546350827440683 | 8.9169455284785517  | 3.0747270168376146  | O11 |
| 8.4825557349949996  | 3.5148545606952486  | 23.9578143436344071 | O12 |
| 0.0560282722110848  | 6.7815142490979676  | 3.0831264602955297  | O13 |
| 6.7360041984620871  | 5.5690177922426392  | 24.0635734814174533 | O14 |
| 4.8632240876902069  | 1.2463636848532036  | 4.3786400160744119  | O15 |
| 1.9880584753226129  | 11.2043837771999026 | 22.7434300545791004 | O16 |
| 10.7098102533777837 | 3.6636389513685668  | 4.3634438587156366  | O17 |
| -3.7652190647656871 | 8.8258592244172380  | 22.7171466205946579 | O18 |
| 5.6921103211684398  | 7.5115162175283352  | 4.3551297722801596  | O19 |
| 1.2453268903790842  | 4.8787142269030523  | 22.6289776305086079 | O20 |
| 2.2987483782802398  | 11.1875895037532693 | 4.4671765438475042  | O21 |
| 4.5485387910268944  | 1.2389063186899436  | 22.5071666238660661 | O22 |
| -3.8246281541879914 | 8.9695378475641245  | 4.4672745803569631  | O23 |
| 10.7519394555026206 | 3.5013939560933784  | 22.5766573723574382 | O24 |
| 1.1446805177634869  | 4.7722621800244509  | 4.4476270274979024  | O25 |
| 5.7226419479723649  | 7.7659884125174132  | 22.4905899792721264 | O26 |
| -1.3833533954616677 | 4.7812988540488144  | 22.5654186096139533 | O27 |

---

|                     |                     |                     |     |
|---------------------|---------------------|---------------------|-----|
| 8.3275360106104372  | 7.6404523269477238  | 4.4342844039473848  | O28 |
| -2.4960443864544812 | 11.1211163191174069 | 22.6050646932525900 | O29 |
| 9.4885440080899084  | 1.3242133029310661  | 4.4207609393811031  | O30 |
| 3.4591457714740912  | 9.0344487090513130  | 22.5692450205925184 | O31 |
| 3.4410745203406266  | 3.4697995892730900  | 4.4105049987419633  | O32 |
| 8.4612111378077408  | 7.4836164276918202  | 22.7888187030888183 | O33 |
| -1.4857499868996600 | 5.0262285825687405  | 4.3588929426451246  | O34 |
| 9.2992766973660093  | 1.3011678804833597  | 22.7182825502996657 | O35 |
| -2.3031450287826605 | 11.1275188912977328 | 4.3469102894969058  | O36 |
| 3.5854383878844835  | 3.7029116873274988  | 22.6933296170161789 | O37 |
| 3.3952301494877579  | 8.7823093289336231  | 4.3328278630006540  | O38 |
| 5.7547296639409176  | 3.3607883678299935  | 5.7286219290362856  | O39 |
| 1.1133985600541800  | 9.1270037249513454  | 21.3129484153343860 | O40 |
| 8.4316941661701037  | 3.3976130605419890  | 5.7190688113193486  | O41 |
| -1.5404168383329395 | 9.0028775421336977  | 21.2735124730230538 | O42 |
| 7.0594570929075804  | 5.6952379398913120  | 5.7483965495641449  | O43 |
| -0.1010985278311956 | 6.7442917872088417  | 21.2775412481646100 | O44 |
| 1.1709061830181815  | 9.1640356638058318  | 5.7690414518897120  | O45 |
| 5.7790358528812718  | 3.1933402897224221  | 21.2341889688518215 | O46 |
| -1.4984082568259587 | 8.9968998233035258  | 5.7502714723825585  | O47 |
| 8.4413043762730702  | 3.3451076351811970  | 21.2639357145666068 | O48 |
| -0.0175598756180180 | 6.7709083569168937  | 5.7560805236614305  | O49 |
| 6.9816886701128258  | 5.5922083752155878  | 21.1856280700427142 | O50 |
| 7.0908776712161714  | 4.1190362785949945  | 7.8554307638230094  | O51 |
| -0.1438606411156940 | 8.3039253944953817  | 19.1553598238770881 | O52 |
| -0.1338951195606883 | 8.3086131756134147  | 7.8920027027523885  | O53 |
| 7.0961934136514371  | 3.9432056695552307  | 19.1041981939415884 | O54 |
| -1.7372866402763396 | 12.4111442027636318 | 6.6003483361519422  | O55 |
| 8.7547787818408480  | -0.0238925063264649 | 20.4579209943320031 | O56 |
| 11.5212263967412891 | 4.8516513899180209  | 6.5991793606961275  | O57 |
| 9.8339609669645789  | 7.6588039721990206  | 20.4849249005595695 | O58 |
| 4.2361449561483475  | 7.6291356265944001  | 6.5763344014456218  | O59 |
| 2.7370724568065201  | 4.7996630961194189  | 20.4253942159765032 | O60 |
| 8.8691741888055358  | 0.0393985709745419  | 6.6636630151723981  | O61 |
| -1.9634655781854731 | 12.3645109463434437 | 20.3307856914590168 | O62 |
| 9.7646396454657207  | 7.7442821030234761  | 6.6689097800830961  | O63 |
| 11.5978296818096567 | 4.6800718920660316  | 20.3523472434854114 | O64 |
| 2.6356123638603104  | 4.6611951898272199  | 6.6449993809122052  | O65 |
| 4.1671996255249688  | 7.8212123201441459  | 20.3235621178910435 | O66 |
| -0.0197012551927802 | 12.4852280882517039 | 4.5872044176480378  | O67 |
| 6.9431153187116701  | 0.0697818103932508  | 22.3901805401773615 | O68 |
| 10.6245194874805691 | 6.3143578332889350  | 4.5861397209978341  | O69 |
| -3.6368395370204381 | 6.1716519424016960  | 22.4317834956944289 | O70 |
| 3.4296819783815762  | 6.1242567258789515  | 4.5594286614313448  | O71 |

---



---

|                     |                     |                     |      |
|---------------------|---------------------|---------------------|------|
| 3.4234558010533971  | 6.3716110558393622  | 22.4382675759235752 | O72  |
| -0.0764791558397180 | 12.4857104706521600 | 8.6823453500977372  | O73  |
| -0.1556378376328142 | 12.4915819366181235 | 18.3830906656626532 | O74  |
| 10.6575602329433323 | 6.2669094083477086  | 8.6868804493319409  | O75  |
| 10.6813410165927962 | 6.2126140627714026  | 18.3878977632803569 | O76  |
| 3.4554161423627940  | 6.1733555973240408  | 8.6690342121187491  | O77  |
| 3.4721618875269522  | 6.2404816655618287  | 18.3004246718987957 | O78  |
| 4.7135873986488015  | 1.1061863106874479  | 8.8008582295393616  | O79  |
| 2.2394905732449244  | 11.3183201762152681 | 18.2266891284990855 | O80  |
| 10.8974919801843502 | 3.6079756817825466  | 8.8210598966931233  | O81  |
| -3.9341172903023298 | 8.8795465810289116  | 18.2755255577542570 | O82  |
| 5.6401365525891132  | 7.7145253148651936  | 8.7842271207257596  | O83  |
| 1.2693006876036748  | 4.7208039214237081  | 18.2589972105868057 | O84  |
| 2.3200013147696330  | 11.3138472380870283 | 8.9017240361367467  | O85  |
| 4.6619432766129494  | 1.1367878212177394  | 18.0885866665419393 | O86  |
| -3.9565694662652522 | 8.9282490265738730  | 8.9169920564515230  | O87  |
| 10.8859277740547729 | 3.5578252521791160  | 18.0693400092132990 | O88  |
| 1.2448365129243317  | 4.6749180372012074  | 8.8874770287843248  | O89  |
| 5.6830653094271968  | 7.7415054937004077  | 18.1440702961311509 | O90  |
| -1.3665180809029418 | 5.0330050532740565  | 18.1925822306305847 | O91  |
| 8.2781727208598763  | 7.4649688793226119  | 8.8205402909795936  | O92  |
| -2.3512882097482146 | 11.0046053500082373 | 18.1253216781808426 | O93  |
| 9.3616453734277716  | 1.4522928927389067  | 8.8223569318731911  | O94  |
| 3.3108937590737817  | 8.8943660081513016  | 18.1038618234144089 | O95  |
| 3.6174921483164231  | 3.5152707761379549  | 8.7997919911059483  | O96  |
| 8.2962189138720763  | 7.4068532319129146  | 18.3844689018577405 | O97  |
| -1.3618261926617261 | 5.1316992988855095  | 8.6815096085321226  | O98  |
| 9.2799838392526084  | 1.4701228451698758  | 18.3733895650365753 | O99  |
| -2.2641202170108423 | 10.9626345526924531 | 8.7149988057914083  | O100 |
| 3.6754567711377915  | 3.5829289811328047  | 18.3192893128146252 | O101 |
| 3.2276361760573922  | 8.8305956111135906  | 8.6614406052837722  | O102 |
| 5.9512427534518899  | 3.1121963980858651  | 10.0303624831017419 | O103 |
| 0.9406393682014320  | 9.3584147639152544  | 16.9769668253543280 | O104 |
| 8.5303192027893857  | 3.6823918424386251  | 10.0345928493791554 | O105 |
| -1.6180001816943763 | 8.7120202981146910  | 16.9825659251260426 | O106 |
| 6.7451512168912107  | 5.6278331598193878  | 10.0055340011092930 | O107 |
| 0.2185227490062713  | 6.8122908493554517  | 16.9941535164023918 | O108 |
| 1.0169013269391662  | 9.3143990593355674  | 10.0645342676715259 | O109 |
| 5.8918023985962087  | 3.1694436495326554  | 16.8793924811268390 | O110 |
| -1.5719808846573962 | 8.7815315359315207  | 10.0752568957538795 | O111 |
| 8.5017791576022219  | 3.5681700172824558  | 16.8958494819222622 | O112 |
| 0.1834370059018333  | 6.8052513380246928  | 10.0602230893040829 | O113 |
| 6.8416720912497766  | 5.6207554943046096  | 17.0332775447521456 | O114 |
| 3.7882610426276884  | 2.1042290443053129  | 11.0645776574387575 | O115 |

---

---

|                     |                     |                     |      |
|---------------------|---------------------|---------------------|------|
| 3.0853088381035949  | 10.3823127577702223 | 15.9086024252444389 | O116 |
| 10.4721236633231580 | 2.3229959219208292  | 11.0906340965717298 | O117 |
| -3.5776448459453096 | 10.0771701315852820 | 15.9456376332196719 | O118 |
| 6.9324555246139195  | 7.9844346628703189  | 11.0710811141455796 | O119 |
| -0.0046753054291040 | 4.4364428810326464  | 15.9645217092445453 | O120 |
| 3.3516349568218153  | 10.0426284571089663 | 11.0076240042930991 | O121 |
| 3.5873178453280992  | 2.3679916182733676  | 15.9780471719341897 | O122 |
| -3.3753141401789573 | 10.4085647265530845 | 11.0574779855893404 | O123 |
| 10.3393966077262860 | 1.9501170528288236  | 16.0044339719843904 | O124 |
| -0.3415353693408991 | 4.4231922039602773  | 11.0184297792626573 | O125 |
| 7.2758087325985175  | 7.9831231356873085  | 16.0113798244930479 | O126 |
| 2.2693447578513353  | -0.0229355340084690 | 11.6122786991240723 | O127 |
| 4.7111973179533253  | 12.4224247638072747 | 15.3390695123244445 | O128 |
| 13.0639124575075734 | 2.0535794225814157  | 11.6530296345422144 | O129 |
| 8.2702672896187579  | 10.3649543561955735 | 15.3535830215462212 | O130 |
| 5.9076103616659639  | 10.3732314326896713 | 11.6684053243910988 | O131 |
| 1.0383633245521642  | 2.0665389009863664  | 15.2993642125494880 | O132 |
| 4.2919014054894467  | 12.4464989894673401 | 11.5417785849747165 | O133 |
| -4.6089708213893577 | 12.4676041180442141 | 15.5135594620850199 | O134 |
| 8.4997536113053087  | 10.0335121572836901 | 11.5740975734108638 | O135 |
| 12.8808474753704747 | 2.3696606985954101  | 15.4781188215880903 | O136 |
| 1.2339035070645230  | 2.3921519829317792  | 11.6050538611096457 | O137 |
| 5.6591705415803295  | 9.9854870760334649  | 15.4696129344727780 | O138 |
| 2.9814999635410624  | 1.7083467342007927  | 13.5150825578748446 | O139 |
| 3.9815409630154743  | 10.6380296633480906 | 13.4834583192162079 | O140 |
| 11.1783593521237385 | 1.7188843267569796  | 13.5240087915240235 | O141 |
| -4.2477956119751274 | 10.7347911567089263 | 13.5133573121225705 | O142 |
| 7.0901263513632342  | 8.8435808195844174  | 13.5250217896480684 | O143 |
| -0.2195148946081680 | 3.5910412526868161  | 13.5027041111356301 | O144 |
| -0.1767537072301471 | 8.1405973701284804  | 26.1275390096827564 | O145 |
| 7.1225483726393479  | 3.8661507966941571  | 26.1437911282466970 | O146 |
| 4.9507500955896351  | 2.8677773109801983  | 4.3857021323385341  | Si1  |
| 1.9327118983560947  | 9.5840978969384629  | 22.6522734684979952 | Si2  |
| 9.2590204271181236  | 2.9335205812544216  | 4.3804759641081548  | Si3  |
| -2.3003509071454649 | 9.5089092498766501  | 22.6341170402038685 | Si4  |
| 7.0548892574527571  | 6.6283677611054515  | 4.3971405871585461  | Si5  |
| -0.1046294162350967 | 5.7804416056318511  | 22.6076233335915191 | Si6  |
| 1.9894129952578714  | 9.5917469173826824  | 4.4116370133196989  | Si7  |
| 4.9552382298713677  | 2.8237983173596604  | 22.5959901552438751 | Si8  |
| -2.2899258428453937 | 9.5051648069240038  | 4.4054757910087332  | Si9  |
| 9.2237131150954283  | 2.9328832119146426  | 22.6362037353986203 | Si10 |
| -0.0816516003806180 | 5.8391713335797713  | 4.4054114848994450  | Si11 |
| 4.5063662806022391  | 2.4667522688574071  | 9.6625517142385249  | Si12 |
| 2.4027445542338226  | 9.9809499868724316  | 17.3191553476534601 | Si13 |

---

---

|                     |                     |                     |      |
|---------------------|---------------------|---------------------|------|
| 9.8144442960168607  | 2.7537025971894256  | 9.6788893136942420  | Si14 |
| -2.8719491419142584 | 9.6810405046274024  | 17.3471174749689361 | Si15 |
| 6.9119757103900055  | 7.2042465872181669  | 9.6562672118437867  | Si16 |
| 0.0147944284048740  | 5.2421110473276915  | 17.3674288350363284 | Si17 |
| 2.4841725968730977  | 9.8812067806730024  | 9.6502712583000676  | Si18 |
| 4.4563925773658548  | 2.5601021968920761  | 17.3310395199445360 | Si19 |
| -2.7993927574004580 | 9.7744480405704639  | 9.6827057361151052  | Si20 |
| 9.7548979527538098  | 2.6394425856885335  | 17.3502722729789554 | Si21 |
| -0.0675658560729104 | 5.2499802143796614  | 9.6539131602700223  | Si22 |
| 7.0227033007766044  | 7.1880509580783674  | 17.4059536316628005 | Si23 |
| 2.5648998518027413  | 1.5396272333666046  | 11.9542853024075235 | Si24 |
| 4.3625748411586542  | 10.8621569139387475 | 15.0470936010275427 | Si25 |
| 11.5633882924051878 | 1.5116917244927273  | 11.9597138078843628 | Si26 |
| -4.6558119795165327 | 10.9064213275264290 | 15.0773564271696952 | Si27 |
| 7.1028036734182525  | 9.3139669665527478  | 11.9691155497779587 | Si28 |
| -0.1768282605727340 | 3.1139689087850644  | 15.0575257304419861 | Si29 |
| 4.3855652932826406  | 10.8766103131429901 | 11.9293629348912233 | Si30 |
| 2.5518300167890553  | 1.5272175102198513  | 15.0723212622676215 | Si31 |
| -4.6288389688071989 | 10.9173702996580495 | 11.9454711786574634 | Si32 |
| 11.5808249017923881 | 1.4894788664158376  | 15.0821977148136597 | Si33 |
| -0.1740000813954370 | 3.1124451169491341  | 11.9499309221693686 | Si34 |
| 7.0759714400235154  | 9.2940856572102959  | 15.0882585772450621 | Si35 |
| -1.5986380791930905 | 12.4427148131504381 | 4.9918004385819055  | Si36 |
| 8.5375245328390488  | 0.0278655606549402  | 22.0588938926628302 | Si37 |
| 11.4517555847355350 | 4.9689824941120166  | 4.9902421562153663  | Si38 |
| 9.9057736790569741  | 7.5057075604430512  | 22.1015992564116637 | Si39 |
| 4.1845422775176706  | 7.5096247556669544  | 4.9674189761765017  | Si40 |
| 2.7633757069590286  | 4.9374279649921515  | 22.0342339447552504 | Si41 |
| 8.7620407187016198  | 0.0102248155833715  | 5.0503296730099274  | Si42 |
| -1.8386179876238939 | 12.4566597831057972 | 21.9411845363705957 | Si43 |
| 9.8333911593274053  | 7.6627630796941961  | 5.0549133505966992  | Si44 |
| 11.5303185984682592 | 4.7948600938578467  | 21.9676667730358268 | Si45 |
| 2.6664626927649504  | 4.7608736383368768  | 5.0300949502785759  | Si46 |
| 4.2159927759055336  | 7.7121107205541071  | 21.9426461638597274 | Si47 |
| -1.6364257451618167 | 12.3692551500528172 | 8.2129252339948113  | Si48 |
| 8.6239551733917157  | 0.0667633278740137  | 18.8471035679153758 | Si49 |
| 11.5295381751924797 | 4.9703199766396411  | 8.2109871983322709  | Si50 |
| 9.8353873422801996  | 7.5235651088717983  | 18.8786386384125535 | Si51 |
| 4.1387113468975194  | 7.5770989614758850  | 8.1878532509998099  | Si52 |
| 2.7915493246079319  | 4.8465139936456705  | 18.8125131759828577 | Si53 |
| 8.7200235809587419  | 0.0690567116972554  | 8.2753077986082992  | Si54 |
| -1.7476114246883689 | 12.3827789313797574 | 18.7258897857193496 | Si55 |
| 9.8001529430748811  | 7.5969137304610808  | 8.2808037961540926  | Si56 |
| 11.5488226937652971 | 4.8758386002005158  | 18.7462288871854490 | Si57 |

---

---

|                     |                     |                     |      |
|---------------------|---------------------|---------------------|------|
| 2.7387460734228446  | 4.7638277261274213  | 8.2571792769727477  | Si58 |
| 4.1648639145223871  | 7.6606018148287713  | 18.7151149873275209 | Si59 |
| 7.0832943135788256  | 4.1366435792568383  | 2.5194899565939255  | Si60 |
| -0.1448933597461153 | 8.2408110806825103  | 24.4999969473543260 | Si61 |
| -0.1302656632316106 | 8.3074578706415956  | 2.5394805508091727  | Si62 |
| 7.0317056427950346  | 4.0541178129919402  | 24.5147182159802632 | Si63 |
| 7.0843455415298866  | 4.1440406081742545  | 6.2537139298700817  | Si64 |
| -0.1696159804051671 | 8.2876537543460636  | 20.7568870860060350 | Si65 |
| -0.1192252699269272 | 8.3102018143868683  | 6.2878963836643376  | Si66 |
| 7.0709442472547668  | 4.0688151508337240  | 20.7162164492277761 | Si67 |
| 7.0788722419263390  | 4.1351807240767657  | 9.4803276637078895  | Si68 |
| -0.1510267684128284 | 8.2958222508469071  | 17.5273424029866369 | Si69 |
| -0.1263869090551024 | 8.3019629604670229  | 9.5197968012063061  | Si70 |
| 7.0835118253584470  | 4.0859117137348484  | 17.4946714494303492 | Si71 |
| 6.9873576168962837  | 6.5513564286750690  | 22.6429763774861428 | All  |
| 7.6937512018169674  | 4.5470590388976690  | 0.3901872412016617  | H1   |
| -0.1168899732806015 | 9.0495633367906549  | 0.4124290149912503  | H2   |
| -0.3264929316331857 | 8.9620496426640042  | 26.6196785911400653 | H3   |
| 6.3962937060950322  | 4.2567128605412394  | 26.6530713540850641 | H4   |
| 6.4622756958522229  | 9.6452663844197417  | 21.9987397888374154 | H5   |
| 8.0236602938970059  | 9.5625969428539932  | 23.8893595994682748 | H6   |
| 6.2782934419945757  | 8.7372211109396307  | 25.3626349906898376 | H7   |
| 5.0196430057141841  | 9.7497961008589744  | 24.5351207955545298 | H8   |
| 6.1061663929737824  | 11.8250385273493510 | 25.4085613851824306 | H9   |
| 7.4368195057459898  | 10.8940464897028075 | 26.1308309798732665 | H10  |
| 5.8053014426496192  | 9.6746047692173960  | 27.5987821517528431 | H11  |
| 4.4661190595622502  | 10.5809416350208512 | 26.8802891434460491 | H12  |
| 6.8197357563183187  | 11.8495616647403672 | 28.4120979246746508 | H13  |
| 12.6684313127624311 | 0.2323876297294377  | 27.7261716629189330 | H14  |
| 5.2604723780091422  | 10.5818007112271086 | 29.9191328167159938 | H15  |
| 3.8810342470018506  | 11.4360517662969539 | 29.2237166722865211 | H16  |
| 12.0390410247877231 | 1.1246515011037277  | 30.0281526768493876 | H17  |
| 13.4259331034761349 | 0.2809460581807374  | 30.7188080189595105 | H18  |
| 4.6819858026903542  | 11.5064808351902741 | 32.2546606752846898 | H19  |
| 3.2838936451368799  | 12.3204221085727355 | 31.5501283080746298 | H20  |
| 12.8052293898932614 | 1.2323085613089675  | 33.0193019918852926 | H21  |
| 11.4088053520179216 | 2.0428162127769278  | 32.3106211503803635 | H22  |
| 4.0702037830038078  | 12.4609716139622009 | 34.5678545758068836 | H23  |
| 9.8860524982258564  | 0.7566003468410238  | 33.8522279513698550 | H24  |
| 10.5486906674564551 | 1.8949924717899072  | 35.9927085604028392 | H25  |
| 10.7602240654728565 | 3.0052804164518814  | 34.6213411600792185 | H26  |
| 5.7177347021863731  | 11.1592598129864307 | 22.5593453392743690 | H27  |
| 7.5033461052085642  | 11.0994686291692215 | 22.0456492474577956 | H28  |
| 12.1725889919838473 | 2.2064719321992667  | 35.3417664304677714 | H29  |

---

|                     |                     |                     |     |
|---------------------|---------------------|---------------------|-----|
| 6.6695375317223125  | 10.6133168053963090 | 22.5649064463845299 | C1  |
| 6.9961196540785338  | 9.9354526811420207  | 23.7794668400195022 | C2  |
| 6.0682159699590539  | 9.6901198546402565  | 24.8564611035885328 | C3  |
| 6.3647686578673790  | 10.8643481577796841 | 25.8794085368000388 | C4  |
| 5.5333205836710002  | 10.6454530625142993 | 27.1512884220198565 | C5  |
| 5.7448602083564158  | 11.7658573136473663 | 28.1722526511170059 | C6  |
| 4.9538080860052656  | 11.5413374903807711 | 29.4653424999315199 | C7  |
| 12.3517996908548824 | 0.1684701993987524  | 30.4847301988735531 | C8  |
| 4.3560134125731356  | 12.4520432170258850 | 31.7840681220096073 | C9  |
| 11.7332713571635150 | 1.0984039262535636  | 32.7846707636889576 | C10 |
| 10.9557549840250061 | 0.8985022353172012  | 34.0869280127164984 | C11 |
| 11.1162057225928059 | 2.0619443851560080  | 35.0650481994505583 | C12 |

Dodecoxy

|                     |                     |                     |     |
|---------------------|---------------------|---------------------|-----|
| 6.9943188393595390  | 4.1041857834650619  | 0.9084363863615414  | O1  |
| -0.0959420203940207 | 8.2266845354103779  | 0.9237341250433073  | O2  |
| 5.7402712872933215  | 3.4180755475801194  | 3.0820275998761004  | O3  |
| 1.1480133938898600  | 9.0508082891914050  | 23.9145880866812490 | O4  |
| 8.4188582095146511  | 3.3530553077715148  | 3.0632059799003399  | O5  |
| -1.4955283282478353 | 9.1153497224576601  | 23.9986681586877815 | O6  |
| 7.1557952314028075  | 5.6952299392873886  | 3.0727408882029366  | O7  |
| -0.2104754353642591 | 6.7474285273156287  | 24.0020908268670894 | O8  |
| 1.0904402056749722  | 9.2741834834414476  | 3.1039913480740831  | O9  |
| 5.9247050239717316  | 3.0187649571868573  | 23.9223946709289486 | O10 |
| -1.5449886382712603 | 8.9337471563322755  | 3.0801507883243420  | O11 |
| 8.5258477892207623  | 3.5700378291309307  | 24.0155115192342201 | O12 |
| 0.0637025857837976  | 6.7966774736511644  | 3.0963200527764001  | O13 |
| 6.7023142387098824  | 5.5576195806733182  | 24.1617857521925039 | O14 |
| 4.8779965220771340  | 1.2586380379440574  | 4.3836846915929000  | O15 |
| 2.0058206422034868  | 11.2725335747418072 | 22.6946032642922582 | O16 |
| 10.7166127169757708 | 3.6666498161696963  | 4.3782276621984035  | O17 |
| -3.7973944818406227 | 8.8327163373527551  | 22.6882417807598387 | O18 |
| 5.6990573118327381  | 7.5216163651377448  | 4.3656225825754218  | O19 |
| 1.3801277550143469  | 5.0302743881087073  | 22.7433875379895802 | O20 |
| 2.3095305633598917  | 11.1931748284891057 | 4.4885021704461607  | O21 |
| 4.5384142310546238  | 1.2448352677424515  | 22.5117448356093028 | O22 |
| -3.8144339964831566 | 8.9736170299358022  | 4.4704478047826184  | O23 |
| 10.7890203921447512 | 3.5519646945282335  | 22.6049597787668084 | O24 |
| 1.1510410647749714  | 4.7820687897852450  | 4.4540675100023916  | O25 |
| 5.7940744309908121  | 7.9499796071215476  | 22.7475761582843035 | O26 |
| -1.2568938684273525 | 4.7493150516261764  | 22.5599713693090358 | O27 |
| 8.3356018903404632  | 7.6507600788398884  | 4.4420972082613330  | O28 |
| -2.5187418582047250 | 11.1278041286856535 | 22.6032076605537604 | O29 |
| 9.4897901844124917  | 1.3304935445472306  | 4.4295864998297398  | O30 |
| 3.4025038640714946  | 9.0510377065230880  | 22.5532242608137601 | O31 |

---

|                     |                     |                     |     |
|---------------------|---------------------|---------------------|-----|
| 3.4471977543457135  | 3.4763771333051054  | 4.4363391399482550  | O32 |
| 8.5527599938496763  | 7.2702786180037764  | 22.7762626929015468 | O33 |
| -1.4798812008463775 | 5.0327433995053452  | 4.3612595156093183  | O34 |
| 9.2391394336566606  | 1.4101570815179398  | 22.6320246183216049 | O35 |
| -2.3011306384551924 | 11.1383238013529731 | 4.3638784217425055  | O36 |
| 3.6621924892625173  | 3.7348839088148442  | 22.7155519312092018 | O37 |
| 3.4014836764219503  | 8.7865755520048392  | 4.3348728020831206  | O38 |
| 5.7623942688802909  | 3.3648860947294517  | 5.7531370204382650  | O39 |
| 1.1169913482701483  | 9.2080764758841980  | 21.2294895699886936 | O40 |
| 8.4391776316294198  | 3.4013658109015750  | 5.7364002625690276  | O41 |
| -1.5307848934885402 | 9.0073372019571440  | 21.3175870376200756 | O42 |
| 7.0668174133785904  | 5.6998618716014668  | 5.7443422815490122  | O43 |
| -0.0254045392725275 | 6.7885038148203680  | 21.3390372197782021 | O44 |
| 1.1799183587099709  | 9.1632744208653101  | 5.7764011390358370  | O45 |
| 5.8331509272586377  | 3.1351382424269474  | 21.2304614285087290 | O46 |
| -1.4901239516890534 | 9.0049564134614055  | 5.7563989119878585  | O47 |
| 8.4555711920381711  | 3.6324487576117028  | 21.3349054626490187 | O48 |
| -0.0178493835811477 | 6.7735850534819431  | 5.7681200854097323  | O49 |
| 6.6793212747056101  | 5.6617589884303019  | 21.2741853036614721 | O50 |
| 7.1084128230481358  | 4.1563369748556571  | 7.8687202244401160  | O51 |
| -0.2109516102088511 | 8.2451101182013797  | 19.1686066686601109 | O52 |
| -0.1257981212024921 | 8.3167426710124435  | 7.9005956474132244  | O53 |
| 7.0996612630880849  | 4.1166152465821089  | 19.1410276103849846 | O54 |
| -1.7318492709240552 | 12.4382301740446817 | 6.6113035315798498  | O55 |
| 8.6676726841997365  | 0.0295388094373847  | 20.4345485566640797 | O56 |
| 11.5401943193021062 | 4.8587032724768608  | 6.6083657946954224  | O57 |
| 9.8614321566091636  | 7.5897961245676084  | 20.4754752307954071 | O58 |
| 4.2390248306582743  | 7.6486868578971450  | 6.5872714609252849  | O59 |
| 2.7705250653671873  | 4.8873807182220421  | 20.4864788777692723 | O60 |
| 8.8802840084965151  | 0.0545269180543635  | 6.6799863186975479  | O61 |
| -1.9350079448901560 | 12.3738289018842931 | 20.3389004955375654 | O62 |
| 9.7791900577614115  | 7.7535266019382743  | 6.6742095276324944  | O63 |
| 11.6785940121593210 | 4.6468148970463261  | 20.3672122821277384 | O64 |
| 2.6224759809064349  | 4.6750022579351516  | 6.6610477889407109  | O65 |
| 4.4611286374898524  | 7.9024623503934910  | 20.4050595049419528 | O66 |
| -0.0115207661853045 | 12.4825575271348406 | 4.6027163098515027  | O67 |
| 6.9255984942625171  | 0.0729451610764170  | 22.4274631888052767 | O68 |
| 10.6295056701038817 | 6.3169730510916908  | 4.5953320279251262  | O69 |
| -3.4356692679125262 | 6.2184220156173602  | 22.4219880509034155 | O70 |
| 3.4390364024038420  | 6.1301587960396118  | 4.5778315359056299  | O71 |
| 3.6659504860731325  | 6.3881643769506580  | 22.4763665992959503 | O72 |
| -0.0693442095460908 | 12.4930972235382924 | 8.6938307830062005  | O73 |
| 7.0284053255127308  | 0.0112736446943138  | 18.3325695117073835 | O74 |
| 10.6765800473017869 | 6.2762980491433398  | 8.6926360826106031  | O75 |

---

---

|                     |                     |                     |      |
|---------------------|---------------------|---------------------|------|
| 10.7801830629337445 | 6.1953028952128788  | 18.3889621708821629 | O76  |
| 3.4593807608877665  | 6.1862300350161714  | 8.6782078026312757  | O77  |
| 3.5587914299666665  | 6.3496070248176775  | 18.4207653964196503 | O78  |
| 4.7193516613014470  | 1.1096276332406452  | 8.8274877392656244  | O79  |
| 2.2356567305036732  | 11.3760991702602237 | 18.2258317145794244 | O80  |
| 10.9047411271629784 | 3.6138383748449456  | 8.8273862546911008  | O81  |
| -3.8646847189316951 | 8.8551711334612566  | 18.2929978642489530 | O82  |
| 5.6533589938749156  | 7.7149420997171658  | 8.7895313206394388  | O83  |
| 1.3463334921270667  | 4.8448441177390222  | 18.2906822284186994 | O84  |
| 2.3285551270287392  | 11.3240478629934742 | 8.9201281180482290  | O85  |
| 4.6337774698732028  | 1.1948328750043387  | 18.1410430705011372 | O86  |
| -3.9514254771210968 | 8.9353752484365110  | 8.9261021442000406  | O87  |
| 10.9196701006686467 | 3.5419793261439168  | 18.0945377213259952 | O88  |
| 1.2590149479058623  | 4.6777813730751214  | 8.9212745932014297  | O89  |
| 5.7741650340280595  | 7.8304336341889531  | 18.1286516553737407 | O90  |
| -1.2971751630484245 | 4.9654033886447353  | 18.2046441626977149 | O91  |
| 8.2904196436022453  | 7.4617976637582801  | 8.8197121170410213  | O92  |
| -2.4068467339867046 | 11.0580706410185616 | 18.1237729859173022 | O93  |
| 9.3674290553258146  | 1.4604503078334585  | 8.8478600557028066  | O94  |
| 3.4053705946948378  | 9.0045867072017085  | 18.2687537590528883 | O95  |
| 3.6351339930732722  | 3.5273305424857995  | 8.8000822022533267  | O96  |
| 8.3763852715997622  | 7.3515905802926413  | 18.3473353643050849 | O97  |
| -1.3499090824710815 | 5.1251873497705045  | 8.7027653761549093  | O98  |
| 9.2338393951586681  | 1.5160324382162638  | 18.3639121196333441 | O99  |
| -2.2547518874335388 | 10.9665993198643186 | 8.7059311805488182  | O100 |
| 3.7325301330781699  | 3.6836670992158926  | 18.3670990386553932 | O101 |
| 3.2494815889775488  | 8.8446315924634398  | 8.6886708744783316  | O102 |
| 5.9696775768996897  | 3.1242534016658814  | 10.0298341886023188 | O103 |
| 1.0341099021762172  | 9.3056814052699117  | 17.0746079767672470 | O104 |
| 8.5446302245791177  | 3.6992243339647022  | 10.0497524787216115 | O105 |
| -1.5558172577289469 | 8.8130153449989024  | 16.9602003874026970 | O106 |
| 6.7599624113534551  | 5.6439841444939400  | 10.0363863845107950 | O107 |
| 0.1709315955249169  | 6.8178272047160116  | 16.9628706539823533 | O108 |
| 1.0263235648881990  | 9.3200026951907766  | 10.0760438128938823 | O109 |
| 5.9219982883134117  | 3.1891891410215698  | 16.9418845957403121 | O110 |
| -1.5649223287499145 | 8.7954996896668352  | 10.0825153829307084 | O111 |
| 8.5234537830265626  | 3.6544836888995280  | 16.9447282077141352 | O112 |
| 0.1852392906477647  | 6.8150526147117549  | 10.0722135677856865 | O113 |
| 6.8175691188299439  | 5.6704137295735757  | 16.9880992364673702 | O114 |
| 3.8058678085980331  | 2.1446748610445834  | 11.0799332290100541 | O115 |
| 3.1413589901561556  | 10.3445419149093762 | 15.9694722876479513 | O116 |
| 10.4883539197368112 | 2.3416491841053766  | 11.1091071196196030 | O117 |
| -3.5949772208600583 | 10.0591908712352929 | 15.9561975992574165 | O118 |
| 6.9588431549076866  | 8.0231164329478730  | 11.0645197136275968 | O119 |

---

---

|                     |                     |                     |      |
|---------------------|---------------------|---------------------|------|
| 0.0987056584208088  | 4.3988305432092032  | 16.0020536873495303 | O120 |
| 3.3486383307131984  | 10.0606095471891770 | 11.0379859484040992 | O121 |
| 3.5697538560504096  | 2.4389877903625523  | 16.0377374284975431 | O122 |
| -3.3662588796571744 | 10.4376006650263076 | 11.0485254518899474 | O123 |
| 10.3292179536166771 | 1.9996937661189955  | 16.0037021241331914 | O124 |
| -0.3302168368309366 | 4.4405931171168662  | 11.0505933227162547 | O125 |
| 7.3641810676087589  | 8.0464149895805281  | 16.0060711865242773 | O126 |
| 2.3063646896174554  | 0.0162390719832435  | 11.6604701194313218 | O127 |
| 4.6867727595044517  | 12.4433788687495621 | 15.3816944798510171 | O128 |
| 13.0827887381851440 | 2.0638462773122495  | 11.6641080654605318 | O129 |
| 8.2819072990087825  | 10.4597250141098765 | 15.3257751361394465 | O130 |
| 5.9055158599638471  | 10.3899042010156695 | 11.6977290885567911 | O131 |
| 1.0462768727535874  | 2.0150243383548001  | 15.2892653051341583 | O132 |
| 4.2958695331970755  | 12.4629233314402228 | 11.5686400356045471 | O133 |
| -4.4983026533927184 | 12.4960097430506121 | 15.5125705019341957 | O134 |
| 8.5071454611158188  | 10.0894827666965128 | 11.5764419183529146 | O135 |
| 12.8934314014624416 | 2.3829259190961638  | 15.5228862462170660 | O136 |
| 1.2546025944017318  | 2.4176972051247816  | 11.6450096354579564 | O137 |
| 5.6966657299531800  | 10.0176489754819453 | 15.4656706908757773 | O138 |
| 3.0363625359130455  | 1.7759067654378762  | 13.5438138236750980 | O139 |
| 3.9756700345451161  | 10.6617597188539435 | 13.5169054405733817 | O140 |
| 11.2094593196868395 | 1.7433266999078674  | 13.5452626560174547 | O141 |
| -4.2045860284405752 | 10.7382982221750254 | 13.5144559291916728 | O142 |
| 7.1320069016262257  | 8.8697022709159086  | 13.5246468496579819 | O143 |
| -0.2199130158513720 | 3.5920553503475654  | 13.5358927034774936 | O144 |
| -0.1267297116739670 | 8.2350222320041144  | 26.1401592269365644 | O145 |
| 7.1171671612330645  | 3.8099043293972090  | 26.1966304606862970 | O146 |
| 4.9591072426261906  | 2.8802903073024595  | 4.4053380988578104  | Si1  |
| 1.8886980184853428  | 9.6559408855773423  | 22.6014999574995237 | Si2  |
| 9.2637495274449133  | 2.9403263850314985  | 4.3942456047956266  | Si3  |
| -2.3336881931546904 | 9.5173456297332208  | 22.6555261610694778 | Si4  |
| 7.0626319209448116  | 6.6393428229764417  | 4.3982110911167736  | Si5  |
| -0.0385921344741114 | 5.8238939255903892  | 22.6679289395686219 | Si6  |
| 1.9972288715582378  | 9.5981993228514284  | 4.4199666085891938  | Si7  |
| 5.0001395850272390  | 2.8091163989028631  | 22.6052677359979910 | Si8  |
| -2.2820595201891902 | 9.5154500599580256  | 4.4122493083219965  | Si9  |
| 9.2369965315780540  | 3.0446683341808445  | 22.6515311164586244 | Si10 |
| -0.0768835427561769 | 5.8476167109796942  | 4.4127302077075230  | Si11 |
| 4.5211734768684462  | 2.4832109816185639  | 9.6708420095838967  | Si12 |
| 2.4620648493111599  | 10.0010323714671934 | 17.3966109949584649 | Si13 |
| 9.8257646671518497  | 2.7656753597347912  | 9.6958796709037323  | Si14 |
| -2.8554846523247450 | 9.7069914913690578  | 17.3506611655422844 | Si15 |
| 6.9272885860087721  | 7.2166386415012198  | 9.6643263861515205  | Si16 |
| 0.0656120643656637  | 5.2494219606463197  | 17.3769898035556594 | Si17 |

---



---

|                     |                     |                     |      |
|---------------------|---------------------|---------------------|------|
| 2.4942311714226104  | 9.8926857182932721  | 9.6713216002669586  | Si18 |
| 4.4637480626575474  | 2.6199009041065318  | 17.3798929620168892 | Si19 |
| -2.7915662953235811 | 9.7862264576951628  | 9.6815637454523156  | Si20 |
| 9.7569478661768887  | 2.6803430266706059  | 17.3605933246860502 | Si21 |
| -0.0583493144175442 | 5.2558849130560752  | 9.6771110785093661  | Si22 |
| 7.0860724368695873  | 7.2246769906375574  | 17.3769362684233819 | Si23 |
| 2.5975519928540911  | 1.5816095236941254  | 11.9888547787269566 | Si24 |
| 4.3781492316977042  | 10.8761460263097423 | 15.0777110631240063 | Si25 |
| 11.5802233972862076 | 1.5296235653550407  | 11.9780506106317262 | Si26 |
| -4.6179768037808318 | 10.9384401312199824 | 15.0734387799939586 | Si27 |
| 7.1215636555767254  | 9.3478351481190938  | 11.9704069769433978 | Si28 |
| -0.1503005841732223 | 3.0953793148171922  | 15.0842531351051168 | Si29 |
| 4.3837303052416008  | 10.8932814708752748 | 11.9600288017286029 | Si30 |
| 2.5938090608655595  | 1.5590787756887896  | 15.0946031176974138 | Si31 |
| -4.6051078210153378 | 10.9470897445810351 | 11.9541923934557026 | Si32 |
| 11.5861338367045601 | 1.5153171863418164  | 15.1093353381470283 | Si33 |
| -0.1617100185642986 | 3.1265158580559924  | 11.9778639677765888 | Si34 |
| 7.1207741763070258  | 9.3483958551923987  | 15.0785974004557559 | Si35 |
| -1.5916447619869354 | 12.4539180291465943 | 5.0023739080083223  | Si36 |
| 8.5057919921420808  | 0.0918456426325282  | 22.0389613349907840 | Si37 |
| 11.4603294049334927 | 4.9735590835141457  | 4.9988165828823945  | Si38 |
| 9.9797499460645227  | 7.4563523847579916  | 22.0900565645093536 | Si39 |
| 4.1919487656525352  | 7.5189972012924349  | 4.9777508884798145  | Si40 |
| 2.8707979466189055  | 4.9994984422934392  | 22.0926813981756283 | Si41 |
| 8.7696587533181969  | 0.0164332388416708  | 5.0657524850521147  | Si42 |
| -1.8500270260214986 | 12.4582853397579463 | 21.9527478157201763 | Si43 |
| 9.8425056851210435  | 7.6690235351134834  | 5.0597954556388389  | Si44 |
| 11.6435401004653194 | 4.7925297806291294  | 21.9816961051016300 | Si45 |
| 2.6690290605928557  | 4.7698593888159113  | 5.0458616903579561  | Si46 |
| 4.2743042447722939  | 7.8074996987541301  | 21.9979848880501443 | Si47 |
| -1.6291162367036272 | 12.3809028793658733 | 8.2226231570602373  | Si48 |
| 8.5823960718408312  | 0.1075893229001589  | 18.8242759617834459 | Si49 |
| 11.5436843153957334 | 4.9748156381498392  | 8.2203176873882811  | Si50 |
| 9.9056856932362400  | 7.4897269573367753  | 18.8699346466526308 | Si51 |
| 4.1485297537638361  | 7.5880867754985291  | 8.1989755846028913  | Si52 |
| 2.8541162604029955  | 4.9451781405679025  | 18.8731434015123369 | Si53 |
| 8.7285616883474564  | 0.0792236491143913  | 8.2916492099694139  | Si54 |
| -1.7710158156144660 | 12.4180735015513921 | 18.7303675621733490 | Si55 |
| 9.8132765378045370  | 7.6022297709210962  | 8.2849157488553686  | Si56 |
| 11.6183012518449278 | 4.8449826782408989  | 18.7632912412500517 | Si57 |
| 2.7444202258387764  | 4.7739992201372470  | 8.2714702339447257  | Si58 |
| 4.2974324434030571  | 7.7556743165791078  | 18.7881786466887739 | Si59 |
| 7.0884787552202813  | 4.1496990186112344  | 2.5300602881740115  | Si60 |
| -0.1805913683518474 | 8.2937114030820691  | 24.5160397863129873 | Si61 |

---

---

|                     |                     |                     |      |
|---------------------|---------------------|---------------------|------|
| -0.1212397667775749 | 8.3207158570532247  | 2.5462061577560302  | Si62 |
| 7.0502011031849312  | 4.0349964934564193  | 24.5777092532515624 | Si63 |
| 7.0937271558184509  | 4.1551315422010688  | 6.2659886312855262  | Si64 |
| -0.1702745421380589 | 8.3072835833151224  | 20.7694271079600554 | Si65 |
| -0.1135602829976188 | 8.3148376835908415  | 6.2954919409283612  | Si66 |
| 7.0141650861511593  | 4.1740843594713288  | 20.7551137773937313 | Si67 |
| 7.0948975832742951  | 4.1560591461425940  | 9.4936561739764294  | Si68 |
| -0.1384475961489473 | 8.2972072602419082  | 17.5443229010935156 | Si69 |
| -0.1195686306668886 | 8.3116746987682273  | 9.5282331068457271  | Si70 |
| 7.0909104014569380  | 4.1595788662110156  | 17.5207201151128018 | Si71 |
| 7.0150108322205273  | 6.5097884802668435  | 22.7533278768085090 | All  |
| 7.6894756036492291  | 4.5403772287599509  | 0.3931587981710987  | H1   |
| -0.1153495902505695 | 9.0499138171126763  | 0.4125949600409720  | H2   |
| -0.2977342065845683 | 9.0516833941838151  | 26.6329329898527867 | H3   |
| 6.4403224913831068  | 4.2583866531888548  | 26.7258256372172980 | H4   |
| 6.5844604155303426  | 10.1394499223991801 | 21.5050379723741010 | H5   |
| 7.3705035377017429  | 8.9848163699936983  | 23.5886400272673420 | H6   |
| 5.7602909706608552  | 8.3980172138842608  | 25.3318268345287443 | H7   |
| 4.5342456425420545  | 9.4741367619212262  | 24.6392864481131539 | H8   |
| 5.9234599675747681  | 11.4708045724087029 | 25.1746207471030807 | H9   |
| 7.2194398101025197  | 10.4389276044057535 | 25.7956916253738626 | H10  |
| 5.6841876359911776  | 9.5231685538624955  | 27.5392229212321134 | H11  |
| 4.3398244100610333  | 10.4477326391253218 | 26.8745283488823965 | H12  |
| 6.8433948111564007  | 11.6846828349237661 | 28.1634922085181074 | H13  |
| 12.6992726696942810 | 0.0927014133967271  | 27.4973454508809958 | H14  |
| 5.3107658649577631  | 10.5576096144466156 | 29.7989369744280630 | H15  |
| 3.9293505835235898  | 11.4052775490390470 | 29.1077814062652429 | H16  |
| 12.1242367540339178 | 1.1065583933262593  | 29.8253263630586787 | H17  |
| 13.5120029611744350 | 0.2673746655343155  | 30.5225224592321176 | H18  |
| 4.7670833380509450  | 11.5176481480781003 | 32.0795772207466356 | H19  |
| 3.3710900845123728  | 12.3248941081463279 | 31.3681201031821253 | H20  |
| 12.8746309038037055 | 1.2473336765539353  | 32.8532291657547475 | H21  |
| 11.4759187152272517 | 2.0504693814833637  | 32.1385402142041912 | H22  |
| 4.1361711569230071  | 12.4420569997139694 | 34.3715955552407308 | H23  |
| 9.9519028630985691  | 0.7318861557460684  | 33.6516492800626708 | H24  |
| 10.5745703890650304 | 1.8428409596086297  | 35.8166702166597517 | H25  |
| 10.7887011589625263 | 2.9785408175308228  | 34.4663403117567384 | H26  |
| 5.1843837303694240  | 10.7995352261113009 | 22.4138975819945898 | H27  |
| 6.8492997428932076  | 11.2171982013934599 | 22.8833978727987493 | H28  |
| 12.2020093070886073 | 2.1851916978421015  | 35.1909163610806672 | H29  |
| 6.2066373816041285  | 10.4107356621849423 | 22.5008549847987709 | C1   |
| 6.3100897776304858  | 9.2337980498804253  | 23.4469437991629377 | C2   |
| 5.6156776607982160  | 9.3497124463840304  | 24.7929460072053658 | C3   |
| 6.1244168193513415  | 10.5052441863623542 | 25.6688686050557102 | C4   |

---

|                                       |                     |                     |     |
|---------------------------------------|---------------------|---------------------|-----|
| 5.4328796030244133                    | 10.4745760962492955 | 27.0365661630713241 | C5  |
| 5.7550759583110311                    | 11.6366534659682550 | 27.9796499288411304 | C6  |
| 5.0112540426671099                    | 11.5044726152941763 | 29.3129890734239673 | C7  |
| 12.4356223366605185                   | 0.1574033825868814  | 30.2977679090739720 | C8  |
| 4.4427388353894077                    | 12.4612840191771816 | 31.6034660636625802 | C9  |
| 11.8062065369699702                   | 1.1057334166184314  | 32.6076805349642456 | C10 |
| 11.0173067953860784                   | 0.8831084654042199  | 33.9004251335009315 | C11 |
| 11.1510082292328221                   | 2.0323766309946785  | 34.8986675654083243 | C12 |
| Co-adsorption of dodecoxy and benzene |                     |                     |     |
| 7.0939543555700979                    | 3.9834178251760792  | 0.9547573546523378  | O1  |
| 0.0010574875529814                    | 8.1078899800097783  | 0.9834842146391163  | O2  |
| 5.8210947527191284                    | 3.3104869977358837  | 3.1220906034761651  | O3  |
| 1.1588687423473552                    | 9.0382231483117543  | 24.0056961845608683 | O4  |
| 8.4983123537720093                    | 3.1946359442009964  | 3.1094856457753877  | O5  |
| -1.4812599694994550                   | 8.8902095801057310  | 24.0725955402730811 | O6  |
| 7.2801529686685758                    | 5.5612361400359278  | 3.1269519467901041  | O7  |
| -0.0366505248772806                   | 6.6327012927161775  | 24.0548751974279540 | O8  |
| 1.1901256693122697                    | 9.1395113595059723  | 3.1693722947369873  | O9  |
| 5.9842141909952247                    | 2.8914266369472745  | 24.0361603466955813 | O10 |
| -1.4472342886080347                   | 8.7984959442110231  | 3.1436092447741468  | O11 |
| 8.5993691249958495                    | 3.4388464650125763  | 24.0639109185451652 | O12 |
| 0.1679512067989317                    | 6.6622204762076498  | 3.1448511231784129  | O13 |
| 6.8216001870154326                    | 5.4337362135174203  | 24.1636169932065172 | O14 |
| 4.9847505112020398                    | 1.1348161985539811  | 4.4161102749612775  | O15 |
| 2.1657584099226517                    | 11.1651656901003271 | 22.7332861224226406 | O16 |
| 10.8023676618273399                   | 3.5490477798718167  | 4.4060131846520338  | O17 |
| -3.7591501192286758                   | 8.7655865376309592  | 22.7034795157800673 | O18 |
| 5.7971697580304395                    | 7.3746387160873157  | 4.4081460611437402  | O19 |
| 1.4410521118780859                    | 4.8325477734370965  | 22.7878876100419667 | O20 |
| 2.4124939545810733                    | 11.0571618598290726 | 4.5494263676212032  | O21 |
| 4.6731194920461228                    | 1.0819902232338527  | 22.6114083242913715 | O22 |
| -3.7167299429796468                   | 8.8574647087328273  | 4.5373224026491163  | O23 |
| 10.8700175503756107                   | 3.4854834896244138  | 22.6739413882331782 | O24 |
| 1.2421377350692748                    | 4.6504732874168599  | 4.5244188869865702  | O25 |
| 5.8300195750294481                    | 7.7834176014060459  | 22.7693666329338313 | O26 |
| -1.1940076018392762                   | 4.6840571044551726  | 22.6220224647028942 | O27 |
| 8.4320826150479782                    | 7.5293409491923162  | 4.5028846344470850  | O28 |
| -2.3387010528005860                   | 10.9777010991031414 | 22.6908743046143755 | O29 |
| 9.6036254320857264                    | 1.1974828601778635  | 4.4863604485048718  | O30 |
| 3.4193049820909955                    | 8.8466566145452887  | 22.6685230396337438 | O31 |
| 3.5395307684394610                    | 3.3453560717863757  | 4.4956050234658527  | O32 |
| 8.6012817061788311                    | 7.1832496210898045  | 22.7613241056674980 | O33 |
| -1.3863046000358503                   | 4.9029904331893830  | 4.3986441285096003  | O34 |
| 9.3739310911993137                    | 1.3064769636900626  | 22.6682260547065937 | O35 |

---

|                     |                     |                     |     |
|---------------------|---------------------|---------------------|-----|
| -2.1960132003715884 | 11.0155887270557233 | 4.4129976702111220  | O36 |
| 3.7317968584275811  | 3.5529420700068322  | 22.7894498487307793 | O37 |
| 3.5054743340548811  | 8.6545140238222249  | 4.3978215503304110  | O38 |
| 5.8636975429944691  | 3.2371069567497921  | 5.7936421273028671  | O39 |
| 1.1639823347171969  | 9.1334152686514916  | 21.3162782093012240 | O40 |
| 8.5393517903989871  | 3.2661301305480270  | 5.7824870264958328  | O41 |
| -1.4686822473419467 | 8.8141143287728987  | 21.3833003058178868 | O42 |
| 7.1751145820219566  | 5.5676209823351535  | 5.7993980059457071  | O43 |
| 0.1279536959537819  | 6.6651407913036476  | 21.3899360520038790 | O44 |
| 1.2839035271516144  | 9.0235856524803317  | 5.8409109859879536  | O45 |
| 5.9334821455969964  | 2.9927943341337069  | 21.3398356206049584 | O46 |
| -1.3888770800264796 | 8.8905669217023213  | 5.8185837180309390  | O47 |
| 8.5486844616325790  | 3.5234501940623546  | 21.3827018182669093 | O48 |
| 0.0621409746516064  | 6.6465587708441243  | 5.8178472919565385  | O49 |
| 6.7490080067608416  | 5.5293715593634225  | 21.2674557273908391 | O50 |
| 7.2061441106252779  | 4.0083873208092369  | 7.9173191340081726  | O51 |
| -0.0980639668327363 | 8.1425479417690347  | 19.2324500198972252 | O52 |
| -0.0367729858127710 | 8.1772955668860892  | 7.9586348972913914  | O53 |
| 7.1533356291292201  | 3.9030280023155162  | 19.1943127968016753 | O54 |
| -1.6180276076923690 | 12.3311854377066847 | 6.6534224704361904  | O55 |
| 1.5827340453125478  | 12.4198358847669912 | 20.4746039301641574 | O56 |
| 11.6206873082040669 | 4.7435335901979174  | 6.6395890273014571  | O57 |
| 9.9493548115340786  | 7.5136271995318635  | 20.4830673061146200 | O58 |
| 4.3578176412076246  | 7.5147041120756253  | 6.6415317094441786  | O59 |
| 2.8491019304730623  | 4.6931247694710558  | 20.5427668365612135 | O60 |
| 1.7541420397423551  | 12.4194643493549606 | 6.7316405013026852  | O61 |
| -1.8072330655094291 | 12.2342403194393619 | 20.4132363301186430 | O62 |
| 9.8882010259020863  | 7.6079580355917571  | 6.7275180116416369  | O63 |
| 11.7499898105670191 | 4.5642879957394831  | 20.4214598577728523 | O64 |
| 2.7251733683965660  | 4.5442792020349936  | 6.7250134035102578  | O65 |
| 4.4570272073344759  | 7.7503935892583637  | 20.4726379233805282 | O66 |
| 0.0959290709156750  | 12.3572662840080945 | 4.6401736273418948  | O67 |
| -0.1426570781135545 | 12.4494735981596385 | 22.4845845451850934 | O68 |
| 10.7282304259620567 | 6.1997829068556962  | 4.6218575721438473  | O69 |
| -3.3725101609460411 | 6.1538787064805645  | 22.4584069807484958 | O70 |
| 3.5305204276020170  | 5.9986877897715010  | 4.6384373204642761  | O71 |
| 3.7153449251305508  | 6.1999943345685065  | 22.5335059159037066 | O72 |
| 0.0259622456277384  | 12.3649829877954591 | 8.7485575628965311  | O73 |
| -0.0842964290517498 | 12.3678124077793932 | 18.3937118126929313 | O74 |
| 10.7877386559109407 | 6.1440482862318975  | 8.7496961934282975  | O75 |
| 10.8640781167537916 | 6.0899389822447496  | 18.4187301687067659 | O76 |
| 3.5678215501676380  | 6.0650148377495920  | 8.7358278341260913  | O77 |
| 3.6186085094700973  | 6.1790730949524564  | 18.4819736508016490 | O78 |
| 4.8165819927877855  | 0.9908598997391970  | 8.8710992990407007  | O79 |

---

|                     |                     |                     |      |
|---------------------|---------------------|---------------------|------|
| 2.3424304092404373  | 11.2445626958962670 | 18.2633141146458158 | O80  |
| 11.0050758951159686 | 3.4790886685269884  | 8.8482834211098282  | O81  |
| -3.8380826416894207 | 8.7440478719407775  | 18.2617307710701695 | O82  |
| 5.7652184255189329  | 7.5879200502272095  | 8.8466012146740312  | O83  |
| 1.4278771942083464  | 4.6484907759775824  | 18.3417124931566100 | O84  |
| 2.4199439869332569  | 11.1878313544833894 | 8.9726980184955529  | O85  |
| 4.7265235090566033  | 1.0220507273510628  | 18.1941892499495381 | O86  |
| -3.8428692727648821 | 8.8046871385554049  | 8.9740485617720296  | O87  |
| 10.9981684811110156 | 3.4327232157585432  | 18.1562325820116968 | O88  |
| 1.3638969597539679  | 4.5685903934324319  | 8.9865938370280514  | O89  |
| 5.8254455574319186  | 7.6830410488600869  | 18.2205254502447112 | O90  |
| -1.2105631382340136 | 4.8525488703688406  | 18.2753544031930772 | O91  |
| 8.4014054139298580  | 7.3325338114419338  | 8.8796006875968914  | O92  |
| -2.2883264040594469 | 10.8852597168815635 | 18.2187851151107942 | O93  |
| 9.4728442609671593  | 1.3214617537899582  | 8.8974708203433135  | O94  |
| 3.4429766795300187  | 8.8336535957053215  | 18.3204304347868820 | O95  |
| 3.7355185437002159  | 3.4081157175916954  | 8.8711646127950203  | O96  |
| 8.4379895910452341  | 7.2025170501418545  | 18.3757245700830367 | O97  |
| -1.2421805508839747 | 4.9866051977537289  | 8.7157324167535126  | O98  |
| 9.3272262212182326  | 1.3859845412666616  | 18.3802146401879725 | O99  |
| -2.1700863526696619 | 10.8491849408887013 | 8.7353758824744290  | O100 |
| 3.8336980587341314  | 3.5182847318318142  | 18.4227305331769600 | O101 |
| 3.3640586155334820  | 8.7225338683063498  | 8.7362582003787193  | O102 |
| 6.0763463883612436  | 2.9897538208205541  | 10.0884423372437375 | O103 |
| 1.0991743908063967  | 9.2022443015626365  | 17.1075754781643425 | O104 |
| 8.6546447279361640  | 3.5617045368666327  | 10.0934051995947289 | O105 |
| -1.4754767830491993 | 8.6322833149945026  | 17.0300639429973053 | O106 |
| 6.8693797228214635  | 5.5070165966733597  | 10.0791761641408950 | O107 |
| 0.3073623439103672  | 6.6841124148851838  | 17.0550893898606901 | O108 |
| 1.1343253179316157  | 9.1731393587870915  | 10.1257134324652363 | O109 |
| 6.0075822289940648  | 3.0110142780393558  | 16.9747649579978734 | O110 |
| -1.4626094929770401 | 8.7031569909365736  | 10.1430957235299708 | O111 |
| 8.6023763353914298  | 3.5495349136649277  | 17.0011372757249610 | O112 |
| 0.2438477933966392  | 6.6850872694864663  | 10.1358460416566274 | O113 |
| 6.8390149438647967  | 5.5132202055111428  | 17.0811352746120377 | O114 |
| 3.9152421859245417  | 2.0070857800207107  | 11.1402290592827793 | O115 |
| 3.2537484736694067  | 10.1769914711325669 | 16.0210391188848007 | O116 |
| 10.6211337316603771 | 2.2200620806542104  | 11.1374206408016221 | O117 |
| -3.4074568135149534 | 9.9886503870045154  | 15.9666041767322486 | O118 |
| 7.0615509424412499  | 7.8762824639477840  | 11.1291900574436600 | O119 |
| 0.1522717996967700  | 4.2849440520218689  | 16.0560733768878983 | O120 |
| 3.4417377546139125  | 9.9246193810596317  | 11.0948448594328752 | O121 |
| 3.6452252550944908  | 2.2764846271530867  | 16.1002390230655337 | O122 |
| -3.2822294014844080 | 10.3370023902079602 | 11.0866007087124743 | O123 |

---

|                     |                     |                     |      |
|---------------------|---------------------|---------------------|------|
| 10.4127279507213064 | 1.9273732828015901  | 16.0328596186714201 | O124 |
| -0.2714142471643135 | 4.2982397942337505  | 11.0777864139112108 | O125 |
| 7.3585073969263171  | 7.8741699883880472  | 16.0544416499933789 | O126 |
| -4.8423819087920084 | 12.4015478370064720 | 11.7018538495868452 | O127 |
| 4.7351629730282854  | 12.3296616478149286 | 15.4688174080122174 | O128 |
| 13.2000652409533181 | 1.9141763598221806  | 11.7604655060010597 | O129 |
| 8.4233504287515579  | 10.2419682869487474 | 15.4577612002566127 | O130 |
| 5.9911265161265677  | 10.2354477930585102 | 11.7752009725535203 | O131 |
| 1.1230521862354070  | 1.9106543730181902  | 15.3370650333889529 | O132 |
| 4.4067535370527224  | 12.3263493379180780 | 11.5858587057914537 | O133 |
| -4.4711373894554072 | 12.3602294774879304 | 15.5589087689585845 | O134 |
| 8.5888023057067073  | 9.9687953024537155  | 11.5848706215151029 | O135 |
| 12.9725078384885215 | 2.2629698173710406  | 15.5235761404495687 | O136 |
| 1.3645666971095636  | 2.3243040794088348  | 11.6867161301544389 | O137 |
| 5.8162005933250613  | 9.9366604483249983  | 15.4771866496930581 | O138 |
| 3.1171967666227798  | 1.6403570145113822  | 13.5970093276739945 | O139 |
| 4.0502336854617011  | 10.5709611631889953 | 13.5692546868843795 | O140 |
| 11.2700033007577378 | 1.5786215737323828  | 13.5793662336252687 | O141 |
| -4.1604174972962902 | 10.6118294186894957 | 13.5520362514697048 | O142 |
| 7.2773798072765850  | 8.7452128885368641  | 13.5795245878068638 | O143 |
| -0.1086175608973836 | 3.5060378009438971  | 13.5773520734711948 | O144 |
| -0.0550271479929183 | 8.0898694253498853  | 26.2114379917809721 | O145 |
| 7.0694770212710649  | 3.7150488810801336  | 26.2533851661201005 | O146 |
| 5.0543949289301100  | 2.7573004697330874  | 4.4482438545039393  | Si1  |
| 1.9533568372198529  | 9.5555304171151025  | 22.6848687068523063 | Si2  |
| 9.3588725558406587  | 2.8047708945594492  | 4.4379702819673010  | Si3  |
| -2.2545696381757163 | 9.3621467785044619  | 22.7154975505142147 | Si4  |
| 7.1689282044850255  | 6.5052159583327915  | 4.4514905729470167  | Si5  |
| 0.0712238241028431  | 5.7037210629524830  | 22.7201066480799554 | Si6  |
| 2.0992930519136808  | 9.4624495558019142  | 4.4837606496990583  | Si7  |
| 5.0877374589215103  | 2.6550518488974157  | 22.7027470475559170 | Si8  |
| -2.1821635544844820 | 9.3929905579010686  | 4.4726675463147449  | Si9  |
| 9.3307929259230953  | 2.9396761813013752  | 22.7007792688831529 | Si10 |
| 0.0164825422186210  | 5.7176418409819911  | 4.4642568889659371  | Si11 |
| 4.6242151122673292  | 2.3562693995549999  | 9.7294990072910625  | Si12 |
| 2.5446356514787984  | 9.8613581189353621  | 17.4402834261116375 | Si13 |
| 9.9372023494256130  | 2.6324056999291026  | 9.7314393161255488  | Si14 |
| -2.7510481231288502 | 9.5737013789085257  | 17.3856543834181956 | Si15 |
| 7.0369677636740935  | 7.0823018648464506  | 9.7204283865757724  | Si16 |
| 0.1561383205909666  | 5.1132486159253547  | 17.4441402109452817 | Si17 |
| 2.5965061338220261  | 9.7575609030063486  | 9.7227813819649676  | Si18 |
| 4.5511747656418660  | 2.4475379881683388  | 17.4346692028912713 | Si19 |
| -2.6972810034207022 | 9.6767177283720240  | 9.7266192581732227  | Si20 |
| 9.8407707954078401  | 2.5756631554989542  | 17.4043388965039689 | Si21 |

---

---

|                     |                     |                     |      |
|---------------------|---------------------|---------------------|------|
| 0.0264871024972306  | 5.1281803907947108  | 9.7190747388601348  | Si22 |
| 7.1197606741302737  | 7.0710971165136174  | 17.4434641223918661 | Si23 |
| 2.6896091503713659  | 1.4613882996486383  | 12.0371032947754326 | Si24 |
| 4.4671717121880397  | 10.7618934478619188 | 15.1297457022601041 | Si25 |
| 11.6848585044508777 | 1.3874391545069173  | 12.0206147052931147 | Si26 |
| -4.5206125241010380 | 10.7984503695433496 | 15.1250986834456569 | Si27 |
| 7.2243328123250423  | 9.2099471294462827  | 12.0227354356150933 | Si28 |
| -0.0706966554959523 | 2.9905464596345404  | 15.1207219361734335 | Si29 |
| 4.4753414684466559  | 10.7635388595645729 | 12.0122514329060799 | Si30 |
| 2.6605662059000510  | 1.4250711203740081  | 15.1438258070567819 | Si31 |
| -4.5331777486500799 | 10.8314720128627329 | 11.9865136296101582 | Si32 |
| 11.6549421269420979 | 1.3964701771347736  | 15.1475771592081152 | Si33 |
| -0.0625049211318642 | 3.0083191414310910  | 12.0288828145843034 | Si34 |
| 7.2177728976513338  | 9.1995852936205917  | 15.1397845461825256 | Si35 |
| -1.4839394932183909 | 12.3339261744877202 | 5.0437033976399510  | Si36 |
| 1.4334409983428857  | 12.4796254615904836 | 22.0804473990265500 | Si37 |
| 11.5508052320506760 | 4.8520718117038486  | 5.0294727075991075  | Si38 |
| 10.0355447688231045 | 7.3810278562040539  | 22.0991881480082739 | Si39 |
| 4.2948131033448806  | 7.3825985052634167  | 5.0327315719390526  | Si40 |
| 2.9374766312440630  | 4.8045791146823316  | 22.1489085089880611 | Si41 |
| 1.6572197417089356  | 12.3848044684950338 | 5.1165861401928803  | Si42 |
| -1.7058584485968273 | 12.3175190461320057 | 22.0263108303436752 | Si43 |
| 9.9429031503763454  | 7.5441145051835594  | 5.1117850944462804  | Si44 |
| -2.7228335987544874 | 4.7249028447279660  | 22.0340639647442806 | Si45 |
| 2.7627163189295065  | 4.6382068956689384  | 5.1091459571171471  | Si46 |
| 4.2961687664612995  | 7.6324007727644441  | 22.0646592628885045 | Si47 |
| -1.5313663869806255 | 12.2627701058179266 | 8.2655463247356273  | Si48 |
| 1.4749737320221499  | 12.4780041817657832 | 18.8644560449495096 | Si49 |
| -2.7890241847376114 | 4.8443699982295687  | 8.2522622214113337  | Si50 |
| 9.9688718329893327  | 7.3777707980289220  | 18.8799023141613240 | Si51 |
| 4.2617258344122453  | 7.4628121157417899  | 8.2531910787438285  | Si52 |
| 2.9345411049989267  | 4.7629375772752622  | 18.9319582237284045 | Si53 |
| 1.6071868238260771  | 12.4444953810755923 | 8.3434847199306077  | Si54 |
| -1.6637134145859847 | 12.2633067992904738 | 18.8026593393209005 | Si55 |
| 9.9228440522917740  | 7.4683794883829018  | 8.3393039442762547  | Si56 |
| -2.7376305834116592 | 4.7420200613618837  | 18.8143783901966728 | Si57 |
| 2.8484987639436725  | 4.6540757437173754  | 8.3349289810378053  | Si58 |
| 4.3374838304585968  | 7.5937167136940582  | 18.8549815116980604 | Si59 |
| 7.1846590906249261  | 4.0195099874026550  | 2.5770471676533440  | Si60 |
| -0.1084788607283151 | 8.1705801877508737  | 24.5877689475424361 | Si61 |
| -0.0221288302870821 | 8.1901336826860263  | 2.6064683838678810  | Si62 |
| 7.1198498566129249  | 3.9169238661154280  | 24.6305524255203530 | Si63 |
| 7.1955188485079784  | 4.0201672865882632  | 6.3144335557973932  | Si64 |
| -0.0758237169802696 | 8.1834981172968018  | 20.8333830890977083 | Si65 |

---

---

|                     |                     |                     |      |
|---------------------|---------------------|---------------------|------|
| -0.0191034534662275 | 8.1849895341447780  | 6.3539797564508556  | Si66 |
| 7.0912131567537990  | 4.0242478029667579  | 20.8048618427910696 | Si67 |
| 7.2018538225069300  | 4.0166744262716021  | 9.5424527923321882  | Si68 |
| -0.0378007443801440 | 8.1668581145301982  | 17.6074989187859039 | Si69 |
| -0.0306738252963905 | 8.1852590540129349  | 9.5862344153025525  | Si70 |
| 7.1509706762809007  | 3.9984101276596076  | 17.5768502106914362 | Si71 |
| 7.0851509497661578  | 6.3807101403279738  | 22.7420104680247057 | Al1  |
| 7.7896022309955359  | 4.4224033048753650  | 0.4424385374924588  | H1   |
| -0.0376650638252185 | 8.9342977094273124  | 0.4786132315752261  | H2   |
| -0.1887759448843482 | 8.9081721313901596  | 26.7135066059489219 | H3   |
| 7.7143925868716376  | 4.2111749040527515  | 26.7796436798432111 | H4   |
| 6.4881471512501152  | 10.2795860626777209 | 22.0173244675394564 | H5   |
| 7.3440865882793291  | 8.7388895268575819  | 23.7795496255728587 | H6   |
| 5.7136214975307142  | 7.6583533172038649  | 25.3188848084403659 | H7   |
| 4.5379711031833709  | 8.9514001916519774  | 25.0061646742562083 | H8   |
| 6.0460818521488893  | 10.6344318111164373 | 26.0095558396717728 | H9   |
| 7.3816425343543903  | 9.4787778816793651  | 26.0607600144341340 | H10  |
| 6.1211996727265996  | 8.0530726214296653  | 27.6755219816178304 | H11  |
| 4.7631517305728455  | 9.1761819585623723  | 27.6418173807371232 | H12  |
| 7.6043760415725528  | 9.9388567907218928  | 28.5402620487146201 | H13  |
| 6.1833028741071496  | 10.9824643554854866 | 28.6079863805054835 | H14  |
| 6.5467028470411339  | 8.3398871765933205  | 30.1384321591695112 | H15  |
| 5.0815523638056197  | 9.3184686506951433  | 30.1845188055767615 | H16  |
| 6.3571351356595676  | 11.2291361304093957 | 31.1721470937530398 | H17  |
| 7.8533603274721733  | 10.2990894366474066 | 31.0854536747336674 | H18  |
| 6.9176398564107711  | 8.5916393221907974  | 32.6499238868374633 | H19  |
| 5.3759292017379536  | 9.4455946967294864  | 32.6943544807765392 | H20  |
| 8.0499652320960973  | 10.6219441823815135 | 33.6556127057530077 | H21  |
| 6.4908337957315707  | 11.4435098830433049 | 33.7172706137413130 | H22  |
| 7.1857168814392809  | 8.8347134642260556  | 35.1846887505192711 | H23  |
| 5.6049067704687525  | 9.6126985771368965  | 35.2193744655818506 | H24  |
| 6.9328696633072049  | 10.2150886742475180 | 37.2675077622546809 | H25  |
| 6.6240139255774224  | 11.6654178369707058 | 36.2879989116722612 | H26  |
| 5.0166108554861966  | 10.5878422599370143 | 22.9983737877706744 | H27  |
| 6.6267432312685548  | 11.0246236915459139 | 23.6056992286113640 | H28  |
| -6.2117054204355258 | 10.8925192829354884 | 36.2485039423497142 | H29  |
| -4.9285541137091373 | 10.9422720768363497 | 20.0580685243887586 | H30  |
| 1.3003297132450915  | 0.1903899243333912  | 18.5782017875823655 | H31  |
| 0.1983020963504747  | 2.1907721037628280  | 19.5821775461049192 | H32  |
| 0.0926317850127367  | 2.4418576836278580  | 22.0563485922055058 | H33  |
| 1.1165880120939806  | 0.7190173528798113  | 23.5269657565070851 | H34  |
| -5.0216862414259200 | 11.2072879279110751 | 22.5265933974417436 | H35  |
| 6.0655518809704185  | 10.2740237976859259 | 23.0312011000389205 | C1   |
| 6.2649749608883578  | 8.9348266149006523  | 23.7013954066773600 | C2   |

---



|                     |                     |                     |     |
|---------------------|---------------------|---------------------|-----|
| 5.6143694071137675  | 8.7248886546983009  | 25.0566959131918665 | C3  |
| 6.2835313886439570  | 9.5663584785710345  | 26.1504375186624713 | C4  |
| 5.8629061469257353  | 9.1204220361250599  | 27.5514775385767479 | C5  |
| 6.5075584027309281  | 9.9284259064868046  | 28.6774087224481917 | C6  |
| 6.1787825158931522  | 9.3798807365782366  | 30.0662272688871504 | C7  |
| 6.7602842677147050  | 10.2010420146717475 | 31.2170999017943593 | C8  |
| 6.4658800910184748  | 9.5988429287933634  | 32.5915533145664043 | C9  |
| 6.9639437787911094  | 10.4454564056173336 | 33.7625185008175848 | C10 |
| 6.6863348184459213  | 9.8182335148627242  | 35.1297836444041067 | C11 |
| 7.1398007705740349  | 10.6921793688121927 | 36.2979528900341464 | C12 |
| -5.4119642918626614 | 11.8200742222516464 | 20.4935340377717026 | C13 |
| 1.2508513668655692  | 0.3015045472149776  | 19.6639496764855970 | C14 |
| 0.6336507698169331  | 1.4232264138635495  | 20.2259204672366977 | C15 |
| 0.5758455390957508  | 1.5684742917813685  | 21.6157601118359999 | C16 |
| 1.1423583916783644  | 0.5947470006621119  | 22.4417440462563036 | C17 |
| -5.4655844451814106 | 11.9681225036546497 | 21.8822994263003316 | C18 |

TS2

|                     |                     |                     |     |
|---------------------|---------------------|---------------------|-----|
| 7.0914282035770828  | 4.0094955630439593  | 0.9473006188669216  | O1  |
| -0.0275803704903712 | 8.1087293102761908  | 0.9737585040312711  | O2  |
| 5.8047191866736183  | 3.3551584040381468  | 3.1129485679033317  | O3  |
| 1.3450022391457201  | 8.8829274199468369  | 24.0756311588711576 | O4  |
| 8.4806817095693177  | 3.2048948327116471  | 3.1055773067054622  | O5  |
| -1.2892948916528901 | 9.0244790173795408  | 24.0301978961127674 | O6  |
| 7.2932396049445618  | 5.5850339223906609  | 3.1217135320147822  | O7  |
| -0.0878394505142759 | 6.6184845689092695  | 24.0436054368277539 | O8  |
| 1.2037408668387810  | 9.1334222480337299  | 3.1386671059768574  | O9  |
| 5.9247716910200268  | 3.0061533939852314  | 24.0544023070114790 | O10 |
| -1.4397157805878678 | 8.8452603356177200  | 3.1432108321178536  | O11 |
| 8.5623430523037385  | 3.2372980263779954  | 24.0468039690628785 | O12 |
| 0.1303528291395790  | 6.6765278195857123  | 3.1432614096846501  | O13 |
| 7.0588353348489967  | 5.4522137752083717  | 24.1849372225751118 | O14 |
| 4.9764387988483536  | 1.1723143107545468  | 4.3984543127418956  | O15 |
| 2.0868818698219869  | 11.0893727824599111 | 22.7845591353002774 | O16 |
| 10.7806863797748704 | 3.5681412394497358  | 4.4063715444756788  | O17 |
| -3.6071839552591438 | 8.7668501858414487  | 22.7713955993225774 | O18 |
| 5.7948692493460952  | 7.3904447621606426  | 4.3928539575837675  | O19 |
| 1.3019256022263823  | 4.7502589714778232  | 22.7274250777598219 | O20 |
| 2.3898907364991882  | 11.0744877173560035 | 4.5202320784692942  | O21 |
| 4.6776695182340102  | 1.1736981245201061  | 22.6014934404796115 | O22 |
| -3.7163497688226013 | 8.8789523751926929  | 4.5265316022621764  | O23 |
| 10.8260548957819136 | 3.4405510500678025  | 22.6641862832415235 | O24 |
| 1.2265987033538472  | 4.6817464623747886  | 4.5244242874423897  | O25 |
| 5.7909035745761210  | 7.5884291123986456  | 22.7426754458070164 | O26 |
| -1.3157723337689624 | 4.6955558399142152  | 22.6617204590254318 | O27 |

---

|                     |                     |                     |     |
|---------------------|---------------------|---------------------|-----|
| 8.4312263110372694  | 7.5574785980344856  | 4.4999041669497766  | O28 |
| -2.3260098826753000 | 11.0579380070186524 | 22.6835662080421692 | O29 |
| 9.5907729760488820  | 1.2131735858236758  | 4.4857786875150714  | O30 |
| 3.5873744092182074  | 8.9448256579638592  | 22.6685776294933987 | O31 |
| 3.5201236523518045  | 3.3755393702945500  | 4.4848494184363341  | O32 |
| 8.5776461288245827  | 7.4925422134515749  | 22.8287274711183805 | O33 |
| -1.4011292871813517 | 4.9058048961792098  | 4.4137946629864873  | O34 |
| 9.5084755610502718  | 1.1711776638993887  | 22.6709349204882784 | O35 |
| -2.2198526124917626 | 11.0518945774878485 | 4.4114774112079038  | O36 |
| 3.6518656905567259  | 3.6126642667063167  | 22.8085844791775756 | O37 |
| 3.5126359830167013  | 8.6838467640587496  | 4.3911793985461882  | O38 |
| 5.8396127405780138  | 3.2783743763420721  | 5.7839075017489208  | O39 |
| 1.2687786763049340  | 8.9761621917936374  | 21.3834483093816416 | O40 |
| 8.5152196052315343  | 3.2778555531831457  | 5.7783322787742106  | O41 |
| -1.3812708390546797 | 8.9470422030728241  | 21.3426706845060146 | O42 |
| 7.1769544390476607  | 5.5939990349893742  | 5.7941219265562713  | O43 |
| -0.0188832337582139 | 6.6360019243838568  | 21.3709820688823271 | O44 |
| 1.2784317938233549  | 9.0349511957506348  | 5.8137466634261781  | O45 |
| 5.8539564231797918  | 3.1781265620380856  | 21.3570033247609246 | O46 |
| -1.3938971118479548 | 8.9351107179908595  | 5.8188338646490569  | O47 |
| 8.5194181726723279  | 3.2387481307161643  | 21.3419277259684286 | O48 |
| 0.0302814202947368  | 6.6726282315770238  | 5.8165729364462493  | O49 |
| 7.1331784741090161  | 5.5387257499449172  | 21.3063166689963985 | O50 |
| 7.1820044625554669  | 4.0302135217780988  | 7.9113339904065239  | O51 |
| -0.0096857224376938 | 8.1659661569999429  | 19.2342881518866591 | O52 |
| -0.0256195051116457 | 8.2156523976287303  | 7.9501319028039026  | O53 |
| 7.1561011599529092  | 3.8899043561626532  | 19.2108092351578001 | O54 |
| -1.6456098621167259 | 12.3819581663777747 | 6.6454843286051579  | O55 |
| 1.6306873179822068  | 12.3032197652249913 | 20.4722812045504625 | O56 |
| 11.5866115117490800 | 4.7572299707960806  | 6.6466094311783381  | O57 |
| 9.9740536753668660  | 7.6514001587627050  | 20.5388558992704091 | O58 |
| 4.3677645338808917  | 7.5279993567030923  | 6.6313287752230643  | O59 |
| 2.7842201962438962  | 4.6644962053896775  | 20.5302221633233870 | O60 |
| 1.7438278829627016  | 12.4124814635227487 | 6.7207523798732636  | O61 |
| -1.8403227309004535 | 12.3282066356338067 | 20.4091882419427577 | O62 |
| 9.8948328728957442  | 7.6357768429629465  | 6.7226227233504998  | O63 |
| 11.6740850139157537 | 4.6010698374272314  | 20.4348435986977428 | O64 |
| 2.7137923083865640  | 4.5788020353837533  | 6.7184222178342798  | O65 |
| 4.3734531217565760  | 7.7089950925912856  | 20.4668095396157561 | O66 |
| 0.0777148356673552  | 12.3820649271112408 | 4.6368138726405164  | O67 |
| 7.0889229378148233  | 0.0426310946428013  | 22.4449692166577606 | O68 |
| 10.7242139916452235 | 6.2209797732606784  | 4.6196860333168335  | O69 |
| 10.8822500247351108 | 6.1160371198266565  | 22.4907425399231400 | O70 |
| 3.5170582698499890  | 6.0287449536661901  | 4.6265732732421547  | O71 |

---

---

|                     |                     |                     |      |
|---------------------|---------------------|---------------------|------|
| 3.4437321324219030  | 6.2913186316236631  | 22.5194062313579657 | O72  |
| 0.0093889669397127  | 12.3879535508598462 | 8.7343378885206420  | O73  |
| -0.0723988389195229 | 12.4172922954358071 | 18.4173003323503295 | O74  |
| 10.7687609113847174 | 6.1668782854106032  | 8.7544189434531710  | O75  |
| 10.7675038240286014 | 6.1474032126643925  | 18.4663299778363417 | O76  |
| 3.5513120906012774  | 6.0981774673768223  | 8.7300019747670170  | O77  |
| 3.5555715168425959  | 6.1701685028662911  | 18.4550625325702669 | O78  |
| 4.8035696335879861  | 1.0196359326638815  | 8.8762846110844542  | O79  |
| 2.3416559084261497  | 11.2758136425910163 | 18.1835891650781569 | O80  |
| 11.0001540618715268 | 3.5031259325657640  | 8.8725677943995311  | O81  |
| -3.8833012724783975 | 8.8130312582271859  | 18.2752255671427122 | O82  |
| 5.7479155846711114  | 7.6228533120418804  | 8.8538641063126846  | O83  |
| 1.3550737734253251  | 4.6398128949709472  | 18.3410301060470147 | O84  |
| 2.4064537929004848  | 11.2222030341565944 | 8.9821964431806371  | O85  |
| 4.7295662516423640  | 1.0512568236571824  | 18.1580872081997278 | O86  |
| -3.8534085567078193 | 8.8279420466812244  | 8.9760768269925730  | O87  |
| 10.9708407883836436 | 3.4926311199440541  | 18.1455846507535803 | O88  |
| 1.3507311483710494  | 4.5936423214832516  | 8.9811694933898725  | O89  |
| 5.7505678506554423  | 7.6955645282950380  | 18.2066638899444655 | O90  |
| -1.2778788333149769 | 4.9598415888187981  | 18.2957410533221179 | O91  |
| 8.3843252360495697  | 7.3629362752766383  | 8.8581365476937108  | O92  |
| -2.2745870602554357 | 10.9198873166501826 | 18.2473730560340641 | O93  |
| 9.4500670629791284  | 1.3562599971922333  | 8.8613575070499522  | O94  |
| 3.3732422825636146  | 8.8291648758795276  | 18.3149344354971220 | O95  |
| 3.7242952415490445  | 3.4397162863516284  | 8.8611035288224134  | O96  |
| 8.3705511352261333  | 7.3346261253149470  | 18.4805904722399639 | O97  |
| -1.2560268861423665 | 5.0161541961975766  | 8.7096249984559044  | O98  |
| 9.3615324420249060  | 1.4043583516333860  | 18.4428221521470626 | O99  |
| -2.1903395827921788 | 10.8781517846598046 | 8.7170803820903480  | O100 |
| 3.7511770148421153  | 3.5034171280933100  | 18.4094743271926014 | O101 |
| 3.3497888083816294  | 8.7576966123753159  | 8.7016913529209390  | O102 |
| 6.0544404062330068  | 3.0232529254548108  | 10.0930548938460802 | O103 |
| 1.0580491155404115  | 9.2430709819985566  | 17.0568469406955927 | O104 |
| 8.6347764393347717  | 3.5830616500218917  | 10.0843224822673410 | O105 |
| -1.5091024189710458 | 8.6344764567726600  | 17.0952675225024286 | O106 |
| 6.8580214041813257  | 5.5358133707629014  | 10.0679364409089356 | O107 |
| 0.2984112145516056  | 6.7100315928260192  | 17.0434803605822403 | O108 |
| 1.1416959689601898  | 9.1908256839174882  | 10.1297045375920902 | O109 |
| 5.9701148293512016  | 3.0966612777535638  | 16.9779222679918398 | O110 |
| -1.4613319913390619 | 8.7376040379016455  | 10.1251996007326603 | O111 |
| 8.5733570685590603  | 3.5193056602520549  | 16.9993194413728013 | O112 |
| 0.2330196294451561  | 6.7111288242369636  | 10.1270318955320775 | O113 |
| 6.8990552274178309  | 5.5565823976480626  | 17.1374566867858071 | O114 |
| 3.8796930120700903  | 2.0426309041355979  | 11.1323075481685905 | O115 |

---

|                     |                     |                     |      |
|---------------------|---------------------|---------------------|------|
| 3.2606104768607080  | 10.1354212186776227 | 15.9898623186712179 | O116 |
| 10.5725084937584661 | 2.2032868866651287  | 11.1334387755494806 | O117 |
| -3.3881747186548288 | 10.0480254148779853 | 15.9870297854994305 | O118 |
| 7.0729405560970786  | 7.8950849847360329  | 11.1245908021818138 | O119 |
| 0.0457660779802027  | 4.3119476642340215  | 16.0680332445460721 | O120 |
| 3.4714576078870270  | 9.9354613154427867  | 11.0667875848105162 | O121 |
| 3.6603302103562187  | 2.3019792660350000  | 16.0606374620227044 | O122 |
| -3.2757501373433975 | 10.3634779461323632 | 11.0801400454555061 | O123 |
| 10.4079659724195519 | 1.9206186565221259  | 16.0646432887406512 | O124 |
| -0.2859085358650884 | 4.3258117256059982  | 11.0742657414773706 | O125 |
| 7.3652660838736770  | 7.9096054140017253  | 16.0985084887679619 | O126 |
| -4.8539146758957656 | 12.4142437425301004 | 11.6814969787854235 | O127 |
| 4.7017992632982990  | 12.3240756982644548 | 15.4635312585625027 | O128 |
| 13.1501449116557048 | 1.9635924560226503  | 11.7788605003477862 | O129 |
| 8.4489722031399150  | 10.2399283249802657 | 15.4168725966420812 | O130 |
| 6.0162590728790661  | 10.2545576771206299 | 11.7754202012730591 | O131 |
| 1.1182080508821339  | 1.9746450175075803  | 15.3662587861998290 | O132 |
| 4.4176643282721013  | 12.3368820911364061 | 11.5887286342426847 | O133 |
| -4.5097538220452709 | 12.3952279159594205 | 15.5655134985603461 | O134 |
| 8.6139966942949933  | 9.9626780104881920  | 11.6426546782405627 | O135 |
| 12.9565816002174579 | 2.2440000126720454  | 15.4891930396835811 | O136 |
| 1.3193504539702339  | 2.3231196586255143  | 11.6687736350068043 | O137 |
| 5.8379576730732508  | 9.9696252214466021  | 15.4772274035093069 | O138 |
| 3.0707069242458287  | 1.6554756744110595  | 13.5823582227383746 | O139 |
| 4.0637838470711038  | 10.5591075458240464 | 13.5528735042119610 | O140 |
| 11.2111606531527528 | 1.5745866057701501  | 13.5825127913051187 | O141 |
| -4.1015532431516206 | 10.6729290936311205 | 13.5565707243760603 | O142 |
| 7.2534263949342641  | 8.7201803478369637  | 13.5907367341534133 | O143 |
| -0.1102643576113442 | 3.5354563338546754  | 13.5772600628059230 | O144 |
| -0.0584548444228501 | 8.0517062371323327  | 26.2168579937762232 | O145 |
| 7.1505257045113311  | 3.7185027606295007  | 26.2580610442254283 | O146 |
| 5.0378127787923397  | 2.7948821245065933  | 4.4361673013288003  | Si1  |
| 2.0548698718338505  | 9.4664334550099145  | 22.7305467955254770 | Si2  |
| 9.3397980960324958  | 2.8192364989731962  | 4.4359404959617921  | Si3  |
| -2.1428265928203394 | 9.4435669044056887  | 22.7066154693696340 | Si4  |
| 7.1714376111388933  | 6.5295310977365979  | 4.4448637269094160  | Si5  |
| -0.0300879802983145 | 5.6851661667138078  | 22.7083188352090879 | Si6  |
| 2.0964436715420423  | 9.4758272965540247  | 4.4600110165287274  | Si7  |
| 5.0468083336220575  | 2.7675777174634248  | 22.7153128239441600 | Si8  |
| -2.1870344894923681 | 9.4294611377975386  | 4.4690982796401011  | Si9  |
| 9.3272257679647357  | 2.7977133157266123  | 22.6908312637606038 | Si10 |
| -0.0080987966050046 | 5.7372683110188891  | 4.4674727968372974  | Si11 |
| 4.6043889840721706  | 2.3877946773154388  | 9.7284097145344113  | Si12 |
| 2.5202975459568666  | 9.8638555488813537  | 17.4021502364611003 | Si13 |

---

|                     |                     |                     |      |
|---------------------|---------------------|---------------------|------|
| 9.9140447602868296  | 2.6483449563476453  | 9.7257486022131463  | Si14 |
| -2.7628245589671541 | 9.6147860235837168  | 17.4164431775279986 | Si15 |
| 7.0277152358382740  | 7.1109482368622841  | 9.7122280074658622  | Si16 |
| 0.0937427924718426  | 5.1488773640514784  | 17.4500907093087569 | Si17 |
| 2.5974067751300440  | 9.7830005649976730  | 9.7112265367478887  | Si18 |
| 4.5320619126749673  | 2.4852929994759561  | 17.4151842225775084 | Si19 |
| -2.7025635543619515 | 9.7046260268253732  | 9.7154842939928834  | Si20 |
| 9.8305947523700414  | 2.5848254036730061  | 17.4265118886250967 | Si21 |
| 0.0132439042915320  | 5.1537635454684922  | 9.7141362799035917  | Si22 |
| 7.0967685757082197  | 7.1250474914709052  | 17.4962157670447027 | Si23 |
| 2.6556335449331225  | 1.4780900613260222  | 12.0205910475155182 | Si24 |
| 4.4683095897621889  | 10.7536419590314996 | 15.1155763085611792 | Si25 |
| 11.6485209304397248 | 1.3981894456777944  | 12.0267682914325551 | Si26 |
| -4.5027935952868026 | 10.8340738634995351 | 15.1231063481128771 | Si27 |
| 7.2335897022049904  | 9.2127976980598376  | 12.0401706971370537 | Si28 |
| -0.1026468566554917 | 3.0164914237411820  | 15.1205269661071924 | Si29 |
| 4.4939909703269514  | 10.7709246203479392 | 12.0003660700507435 | Si30 |
| 2.6401952353262121  | 1.4584647174116541  | 15.1372660593754524 | Si31 |
| -4.5154215159580531 | 10.8551483610486539 | 11.9955321229365577 | Si32 |
| 11.6237602593046319 | 1.3904639625536166  | 15.1445238092152170 | Si33 |
| -0.0900211067252106 | 3.0354378615719462  | 12.0284225067424337 | Si34 |
| 7.2262259665561652  | 9.2053946662286883  | 15.1441430015358129 | Si35 |
| -1.5031148149786917 | 12.3706851768585313 | 5.0362721048162076  | Si36 |
| 1.4540911090142448  | 12.4156794573219695 | 22.0770708298885410 | Si37 |
| 11.5318404119961073 | 4.8666321706146070  | 5.0354501926198294  | Si38 |
| 10.0214321874569716 | 7.4712014369856359  | 22.1600865814019841 | Si39 |
| 4.2946135049432801  | 7.4052442205868676  | 5.0220321696893615  | Si40 |
| 2.8257871218046140  | 4.8396489408944907  | 22.1384783728997654 | Si41 |
| 1.6411854568827646  | 12.3974807511743759 | 5.1058967291915449  | Si42 |
| -1.6980882824346439 | 12.4072358445970483 | 22.0201851659088845 | Si43 |
| 9.9431789212470783  | 7.5688086955986318  | 5.1069067377820723  | Si44 |
| 11.6021260397877057 | 4.7278614723987236  | 22.0504253150703384 | Si45 |
| 2.7487159616956194  | 4.6700105706256405  | 5.1025738970213714  | Si46 |
| 4.3395954779769799  | 7.5964810950368911  | 22.0909300781557718 | Si47 |
| -1.5504642805183275 | 12.2947362374023292 | 8.2565755094286413  | Si48 |
| 1.4967737564510202  | 12.4798605759333388 | 18.8686962985663094 | Si49 |
| -2.8067584711460576 | 4.8668076244846148  | 8.2591298422733406  | Si50 |
| 9.9215594857232663  | 7.4653458688829835  | 18.9391147282688124 | Si51 |
| 4.2518576675584185  | 7.4914461267544503  | 8.2424334475997600  | Si52 |
| 2.8701781431247158  | 4.7637857475340253  | 18.9203608691292899 | Si53 |
| 1.5913024024735947  | 12.4660877550320546 | 8.3314220645185273  | Si54 |
| -1.6563216005114212 | 12.3128963252263173 | 18.8014039009433276 | Si55 |
| 9.9125163385526047  | 7.4945374140839931  | 8.3347598966515619  | Si56 |
| 11.6298361145024280 | 4.8086519821165759  | 18.8313919694529588 | Si57 |

---

---

|                     |                     |                     |      |
|---------------------|---------------------|---------------------|------|
| 2.8350744471743012  | 4.6852368901185608  | 8.3286215711254865  | Si58 |
| 4.2670666597469431  | 7.5873784347553253  | 18.8622308465636230 | Si59 |
| 7.1786556482844750  | 4.0455280713803026  | 2.5699952308439213  | Si60 |
| -0.0256694066739840 | 8.1513731265565745  | 24.5926779336941834 | Si61 |
| -0.0332739605328749 | 8.2040520316890113  | 2.5964578495687971  | Si62 |
| 7.1731576756194819  | 3.9172009039705786  | 24.6298411716146504 | Si63 |
| 7.1784104035876704  | 4.0461647934191527  | 6.3084011242324269  | Si64 |
| -0.0385234394938170 | 8.1756387739345548  | 20.8362429956341302 | Si65 |
| -0.0278307004046159 | 8.2146855814588768  | 6.3451591710395450  | Si66 |
| 7.1650542687071219  | 4.0175904973240719  | 20.8271652355137995 | Si67 |
| 7.1824072590670891  | 4.0426515283418283  | 9.5365719466534333  | Si68 |
| -0.0405019877702983 | 8.1903188789714783  | 17.6090676875837495 | Si69 |
| -0.0284814437203043 | 8.2138439690801430  | 9.5781856102734082  | Si70 |
| 7.1511727182377793  | 4.0241760825258455  | 17.6018181335820429 | Si71 |
| 7.1499927498630971  | 6.4879914543866395  | 22.7846728186709235 | All  |
| 7.8002074504477044  | 4.4297680919365199  | 0.4371594702588337  | H1   |
| -0.0483957054102859 | 8.9322665618022903  | 0.4631747915879167  | H2   |
| -0.0864098473790920 | 8.8789553288947900  | 26.7212055668624870 | H3   |
| 7.3983092019277752  | 4.5021884335810975  | 26.7713245991904571 | H4   |
| 5.9932813133947853  | 11.8506326980868320 | 21.4755095050272793 | H5   |
| 6.9299615536311725  | 9.7413034484392487  | 22.3987548820436224 | H6   |
| 7.4915972088752394  | 9.5637770291377890  | 24.7377499465952440 | H7   |
| 5.8150274451662982  | 9.3505194936211975  | 24.3994474593528921 | H8   |
| 5.3126911137751138  | 11.7145717765750685 | 25.2650560492764633 | H9   |
| 7.0162829387849603  | 11.8918722035736941 | 25.6850303389893995 | H10  |
| 6.7866027512362592  | 9.8156984980199358  | 27.1796956110948713 | H11  |
| 5.0555394791172343  | 9.8287811605911575  | 26.8399180036401148 | H12  |
| 6.6460477223518852  | 12.1268743432416688 | 28.1254490591006068 | H13  |
| 4.9214106117421483  | 12.1905814185281116 | 27.7677727353586938 | H14  |
| 6.2213971080182269  | 10.1615775134437580 | 29.6801903314486921 | H15  |
| 4.4920512481031496  | 10.3164490242044344 | 29.3648714599646681 | H16  |
| 11.7809642519689302 | 0.1918738455366740  | 30.2393246947303673 | H17  |
| 13.5008582291446544 | 0.0045816850345510  | 30.5752281959448275 | H18  |
| 5.7581436003930015  | 10.6378080061954936 | 32.1930088392934266 | H19  |
| 4.0374374351417321  | 10.8457843148579602 | 31.8626161189355415 | H20  |
| 13.1064974931288294 | 0.5009517259041875  | 33.0410104237084141 | H21  |
| 11.3941762583273345 | 0.7298295418860127  | 32.6899427341739539 | H22  |
| 5.3078349083397889  | 11.1767391028794254 | 34.6776051710899793 | H23  |
| 3.5964739924813562  | 11.4099927071929717 | 34.3259761342180099 | H24  |
| 11.4494096047349245 | 0.1283468297753791  | 36.4282883183321644 | H25  |
| 10.9578589431871780 | 1.2924911669036203  | 35.1794201858416287 | H26  |
| 4.7457550107939666  | 11.0538525364216191 | 22.4432690174033169 | H27  |
| 5.5924261393303976  | 12.4569343359627780 | 23.1284140067801367 | H28  |
| 12.6793198266593272 | 1.0531192752642140  | 35.5398376089168906 | H29  |

---

|                                      |                     |                     |     |
|--------------------------------------|---------------------|---------------------|-----|
| -5.4354870648568658                  | 10.3124386408079864 | 20.7830291392214939 | H30 |
| -5.8472037644475945                  | 12.3776044788017714 | 19.4455082310089651 | H31 |
| 0.9434092074038651                   | 2.0408098072420975  | 20.6084676182617557 | H32 |
| 0.9927591498201946                   | 2.1771410270475262  | 23.0817622490290688 | H33 |
| 1.4622237653047894                   | 0.1262169835913113  | 24.4242474668811553 | H34 |
| -5.3018714490972592                  | 10.4554016454219862 | 23.2543538009112183 | H35 |
| 5.7289349715560780                   | 11.5688899811755768 | 22.5021561178918645 | C1  |
| 6.6267048398352477                   | 10.5535266503362788 | 23.0649695104474013 | C2  |
| 6.5946536751146567                   | 10.1517035040379220 | 24.4824126057211480 | C3  |
| 6.2088808429568259                   | 11.1490731264796832 | 25.5672632632980203 | C4  |
| 5.9430442764887266                   | 10.4811239010980657 | 26.9222852307459242 | C5  |
| 5.7385808510041656                   | 11.5007204785904626 | 28.0452719167683355 | C6  |
| 5.4344187492296481                   | 10.8913097293545000 | 29.4165827284789820 | C7  |
| 5.3308778186211372                   | 11.9471491322647534 | 30.5211311068870046 | C8  |
| 4.9992627916144263                   | 11.3885297374081613 | 31.9064207779025999 | C9  |
| 4.9220209868910079                   | 12.4686881055510828 | 32.9882071680376470 | C10 |
| 4.5654134157718280                   | 11.9370878735197472 | 34.3775994534779272 | C11 |
| 11.7129386572601977                  | 0.5339602491394912  | 35.4402254343625032 | C12 |
| -5.6356733450864027                  | 11.2647826282139416 | 21.2785983461809209 | C13 |
| -5.8647808261081247                  | 12.4139401078663081 | 20.5365457573399581 | C14 |
| 1.1174353038104741                   | 1.1351576289897582  | 21.1943771115817654 | C15 |
| 1.1375643864688638                   | 1.2142024793846442  | 22.5909747741679112 | C16 |
| 1.3872529733789560                   | 0.0669810050640233  | 23.3379977240804237 | C17 |
| -5.6578060342133023                  | 11.3208050016218316 | 22.6947264718957555 | C18 |
| Protonated dodecylbenzene adsorption |                     |                     |     |
| 7.0889832784182207                   | 4.0307002917052168  | 0.9337919805317664  | O1  |
| -0.0377019269272658                  | 8.1226220254887807  | 0.9581741137272536  | O2  |
| 5.7900047909703467                   | 3.3826279186620534  | 3.0944538678323901  | O3  |
| 1.3738526842434506                   | 8.8614693781454275  | 24.0544040426146495 | O4  |
| 8.4653075839297021                   | 3.2174970170947663  | 3.0988738964393212  | O5  |
| -1.2529326397980487                  | 9.1121552566540842  | 24.0040430167928598 | O6  |
| 7.2921535903479091                   | 5.6032414885692585  | 3.1099619298488714  | O7  |
| -0.1508827648788831                  | 6.6580585854906573  | 24.0367506493593730 | O8  |
| 1.2005612654391760                   | 9.1365092798029544  | 3.1240065231996565  | O9  |
| 5.9091476938740453                   | 3.0671572694926721  | 24.0510024617157043 | O10 |
| -1.4443651657916075                  | 8.8626964928468333  | 3.1304748752361586  | O11 |
| 8.5480763380656093                   | 3.2246462081596809  | 24.0446284783209592 | O12 |
| 0.1142141504890795                   | 6.6861835509246328  | 3.1260369212779326  | O13 |
| 7.0959050169076381                   | 5.4830760319532450  | 24.1668115293589167 | O14 |
| 4.9726257127184113                   | 1.1913304148852557  | 4.3742670342989491  | O15 |
| 2.0553750605926009                   | 11.1017025980541408 | 22.7995471309320230 | O16 |
| 10.7696827663260812                  | 3.5848866513357276  | 4.3927626247584435  | O17 |
| -3.5843253260078676                  | 8.8206825692203701  | 22.7645921099120621 | O18 |
| 5.7906366670769049                   | 7.4051741245252698  | 4.3797551930297463  | O19 |

---

|                     |                     |                     |     |
|---------------------|---------------------|---------------------|-----|
| 1.2941127054044652  | 4.8154370568733276  | 22.7368291673368006 | O20 |
| 2.3795411363284860  | 11.0879369499787810 | 4.4951558006295116  | O21 |
| 4.6909458527098282  | 1.2423901381164331  | 22.5648704458113762 | O22 |
| -3.7221012325605143 | 8.8963521320692003  | 4.5130512487570948  | O23 |
| 10.8018985691439919 | 3.4850904387980353  | 22.6578235746759056 | O24 |
| 1.2197875349177716  | 4.6993578766115407  | 4.5108095720210715  | O25 |
| 5.8115471999693069  | 7.6073427581623880  | 22.7197327302484524 | O26 |
| -1.3221090693707245 | 4.7109857447143160  | 22.6393392692060829 | O27 |
| 8.4268389793371234  | 7.5745249586616472  | 4.4932617210301542  | O28 |
| -2.3409886107786395 | 11.1255944411742682 | 22.6577680435069517 | O29 |
| 9.5842801928893593  | 1.2278833541889229  | 4.4711325232445196  | O30 |
| 3.6063251142464230  | 8.9818169855581402  | 22.6365661566214307 | O31 |
| 3.5103947374211568  | 3.3908187873679245  | 4.4744852256001906  | O32 |
| 8.6040986139742550  | 7.5546804447631999  | 22.8348253191706974 | O33 |
| -1.4083184617731019 | 4.9155589289000554  | 4.4049948759593445  | O34 |
| 9.5296328677859865  | 1.1837192965535712  | 22.6547037654798729 | O35 |
| -2.2268998288042123 | 11.0704013957069378 | 4.3951943800975251  | O36 |
| 3.6224480479533021  | 3.6483232850464278  | 22.8058221078862751 | O37 |
| 3.5087783402071464  | 8.6993650765130788  | 4.3823918148141052  | O38 |
| 5.8343482933944646  | 3.2940343303250343  | 5.7646189030452453  | O39 |
| 1.2832949101241145  | 8.9925902990170936  | 21.3654697966461526 | O40 |
| 8.5095141126475582  | 3.2900268315847234  | 5.7720488248979871  | O41 |
| -1.3670308186475526 | 9.0217643279279649  | 21.3197903657411914 | O42 |
| 7.1732871019344611  | 5.6087345479056703  | 5.7816860655541795  | O43 |
| -0.0507325687891300 | 6.6787140834682885  | 21.3679061005075148 | O44 |
| 1.2716240780773891  | 9.0515538492362868  | 5.7994105615605749  | O45 |
| 5.8287781424461400  | 3.2955941233867230  | 21.3528473034698756 | O46 |
| -1.4008260031916309 | 8.9562098244627837  | 5.8065115972773444  | O47 |
| 8.4927462008070105  | 3.2242026170204268  | 21.3397723721073653 | O48 |
| 0.0202595383083484  | 6.6909428898081709  | 5.8002352353612689  | O49 |
| 7.2249029523611732  | 5.5906003269176008  | 21.2949989443810956 | O50 |
| 7.1666044500525752  | 4.0468901483422046  | 7.8986729852981084  | O51 |
| -0.0124891771633076 | 8.1874513843130003  | 19.2210481648556915 | O52 |
| -0.0323092622213128 | 8.2336259542335739  | 7.9361503866467977  | O53 |
| 7.1598122100371206  | 3.9316342525252144  | 19.2065630041121196 | O54 |
| -1.6600544617931128 | 12.4092612411968588 | 6.6278591218268073  | O55 |
| 1.6375776192600329  | 12.2954431892097915 | 20.4673801827117430 | O56 |
| 11.5762802265401596 | 4.7688459968911809  | 6.6352524956725834  | O57 |
| -4.4421040616886982 | 7.7054918721105352  | 20.5369858022599772 | O58 |
| 4.3708471877040358  | 7.5403071527967809  | 6.6202669015807905  | O59 |
| 2.7497621936483050  | 4.6861728968832921  | 20.5290748433238157 | O60 |
| 1.7463255716121724  | 12.4200434515022451 | 6.7026094282695921  | O61 |
| -1.8377602570022198 | 12.3842973142395323 | 20.3858760157615428 | O62 |
| 9.8977134542424725  | 7.6524826545142579  | 6.7130259649934692  | O63 |

---



---

|                     |                     |                     |      |
|---------------------|---------------------|---------------------|------|
| 11.6483131886072790 | 4.6305916557068558  | 20.4234710003678011 | O64  |
| 2.7024232482463018  | 4.5974725051382279  | 6.7073768213014260  | O65  |
| 4.3962604114684156  | 7.7238043693702778  | 20.4457389502337286 | O66  |
| 0.0705352766367149  | 12.3987386213239983 | 4.6252047989190368  | O67  |
| 7.0946224075448550  | 0.0960611048932485  | 22.4254699655751892 | O68  |
| 10.7207647573608043 | 6.2381025172734432  | 4.6085145975393926  | O69  |
| -3.5337675592330062 | 6.1632016107693115  | 22.4834089853145898 | O70  |
| 3.5115741204436004  | 6.0445759042880898  | 4.6163869190189111  | O71  |
| 3.4575917417402247  | 6.3309239558846553  | 22.5010322137194763 | O72  |
| 0.0055079836959653  | 12.4001738809039743 | 8.7104272636733917  | O73  |
| -0.0550052440934641 | 12.4422044147471258 | 18.4043155266685439 | O74  |
| 10.7667799053667395 | 6.1798389704217884  | 8.7453551856423992  | O75  |
| 10.7522776580429333 | 6.1847560794017253  | 18.4598817308530556 | O76  |
| 3.5501787074201725  | 6.1123633833084270  | 8.7186325305982209  | O77  |
| 3.5664320532858746  | 6.1728718985165267  | 18.4502275933602569 | O78  |
| 4.8012506125194561  | 1.0333827532159576  | 8.8702018932543467  | O79  |
| 2.3534707182589774  | 11.2901755221656934 | 18.1687951924876927 | O80  |
| 10.9985429306906290 | 3.5156230570124576  | 8.8640301948663787  | O81  |
| -3.8853651064616992 | 8.8530811018061719  | 18.2652124581759239 | O82  |
| 5.7458011639036588  | 7.6380787262008472  | 8.8478060360914501  | O83  |
| 1.3425008780546173  | 4.6732112578368916  | 18.3278401716918466 | O84  |
| 2.4037332027115434  | 11.2357278653681369 | 8.9667582100363390  | O85  |
| 4.7455981370676037  | 1.0781218353878570  | 18.1246420717332981 | O86  |
| -3.8553476685950581 | 8.8414414387361244  | 8.9692421729750524  | O87  |
| 10.9602912370903791 | 3.5313047491993701  | 18.1254756154760415 | O88  |
| 1.3483532023142089  | 4.6103761627032478  | 8.9756985035246775  | O89  |
| 5.7462146194219503  | 7.7114105970971725  | 18.1703093480217710 | O90  |
| -1.2914212150121107 | 5.0007020758799063  | 18.2902443925369802 | O91  |
| 8.3828986439379527  | 7.3765943039578561  | 8.8449820095793719  | O92  |
| -2.2647673363944198 | 10.9502278866010609 | 18.2362393065696295 | O93  |
| 9.4452329814138469  | 1.3691009902635316  | 8.8432634359377946  | O94  |
| 3.3632868731839451  | 8.8299771918544430  | 18.3002195198738242 | O95  |
| 3.7215437783180763  | 3.4540537785378338  | 8.8436564589846380  | O96  |
| 8.3636691350860417  | 7.3914443322079872  | 18.4974167218747390 | O97  |
| -1.2585016912188192 | 5.0282545218509487  | 8.6930163107451630  | O98  |
| 9.3877477478398159  | 1.4180565100319584  | 18.4575302228520535 | O99  |
| -2.1965455757949401 | 10.8936638443225124 | 8.6931304801708880  | O100 |
| 3.7156133037443468  | 3.4987061842079106  | 18.4245529000565789 | O101 |
| 3.3487160285900943  | 8.7720526134353669  | 8.6868226198681722  | O102 |
| 6.0483735057504635  | 3.0399809755647347  | 10.0840444008128127 | O103 |
| 1.0537361870860611  | 9.2679375397765700  | 17.0439247388604720 | O104 |
| 8.6290235326276701  | 3.5954558468303635  | 10.0654218947769483 | O105 |
| -1.5127130989488728 | 8.6611987244224302  | 17.0833193476193586 | O106 |
| 6.8578292632341764  | 5.5514870022680487  | 10.0589397977253068 | O107 |

---

---

|                     |                     |                     |      |
|---------------------|---------------------|---------------------|------|
| 0.2884627248302984  | 6.7356714644471314  | 17.0231813558486351 | O108 |
| 1.1425608499438740  | 9.2038453680116774  | 10.1163742659881528 | O109 |
| 5.9433331296247971  | 3.1674021199885165  | 16.9786029480980645 | O110 |
| -1.4615168443592479 | 8.7631909309682943  | 10.1143106546996524 | O111 |
| 8.5564981704905740  | 3.5032153709243130  | 16.9933925997539319 | O112 |
| 0.2227590134863737  | 6.7289364561494835  | 10.1131449735858467 | O113 |
| 6.9494528448602386  | 5.5919023545986288  | 17.1208480421122609 | O114 |
| 3.8684340983470258  | 2.0652171562382042  | 11.1185907730978482 | O115 |
| 3.2646280234166163  | 10.1402438421416008 | 15.9780054254656569 | O116 |
| 10.5606865321613306 | 2.2104708510819178  | 11.1204594629864388 | O117 |
| -3.3871023669541311 | 10.0807538184136742 | 15.9769920707299224 | O118 |
| 7.0803582965068399  | 7.9120296598903508  | 11.1142086357068806 | O119 |
| 0.0233833521292675  | 4.3300314354630558  | 16.0629215737769684 | O120 |
| 3.4738528137303462  | 9.9509791721242671  | 11.0509941947028150 | O121 |
| 3.6525107849395706  | 2.3423932382451342  | 16.0487865169329815 | O122 |
| -3.2766155578444076 | 10.3949227292383863 | 11.0603454979346321 | O123 |
| 10.4073489770910772 | 1.9260661892459601  | 16.0656587005755327 | O124 |
| -0.2961763551998389 | 4.3448688676805824  | 11.0631263555286061 | O125 |
| 7.4001425850506060  | 7.9492874839979537  | 16.0947726879927657 | O126 |
| -4.8625544531875136 | 12.4371796758759725 | 11.6744382601417165 | O127 |
| 4.6968134313830259  | 12.3336950134441636 | 15.4444806670025709 | O128 |
| 13.1376909850647827 | 1.9844935857156567  | 11.7728364271725958 | O129 |
| 8.4516686155920375  | 10.2824858254994513 | 15.3855408547127190 | O130 |
| 6.0199914026905654  | 10.2708686261064077 | 11.7593817059531975 | O131 |
| 1.1141623990777336  | 2.0004153347703602  | 15.3572136276440112 | O132 |
| 4.4153994082377483  | 12.3504515119592799 | 11.5887308870050845 | O133 |
| -4.4990723340142056 | 12.4287747128943789 | 15.5534764834080441 | O134 |
| 8.6199184145094812  | 9.9805082467946793  | 11.6403888634430110 | O135 |
| 12.9515840596953939 | 2.2531055057023264  | 15.4775639852178788 | O136 |
| 1.3072599523915884  | 2.3433684962795840  | 11.6605542083940783 | O137 |
| 5.8434364438362598  | 9.9864007154107117  | 15.4725498286759020 | O138 |
| 3.0659566358737820  | 1.6868198695395429  | 13.5695885676597037 | O139 |
| 4.0696904723220557  | 10.5572317327926921 | 13.5409347176089074 | O140 |
| 11.1975181275135167 | 1.5936682172765040  | 13.5753386112573047 | O141 |
| -4.0835412718527806 | 10.7042646806019910 | 13.5426411662710393 | O142 |
| 7.2529527224229859  | 8.7387942263796248  | 13.5810447370384804 | O143 |
| -0.1220429736536430 | 3.5570852123738286  | 13.5691629914844789 | O144 |
| -0.0658041639457716 | 8.0984647048962941  | 26.2002034284969696 | O145 |
| 7.1703272474267861  | 3.7646961822722647  | 26.2531561887233664 | O146 |
| 5.0292645711333526  | 2.8139677776143865  | 4.4173308747596840  | Si1  |
| 2.0705241221649402  | 9.4801692805793092  | 22.7158546646659474 | Si2  |
| 9.3300264280204086  | 2.8334955473874968  | 4.4259702326489148  | Si3  |
| -2.1267849531784662 | 9.5109704393009142  | 22.6877933028778713 | Si4  |
| 7.1679728031549743  | 6.5459174781124023  | 4.4337699689694325  | Si5  |

---

---

|                     |                     |                     |      |
|---------------------|---------------------|---------------------|------|
| -0.0564963497335791 | 5.7252878212022553  | 22.7035143705742257 | Si6  |
| 2.0902376304053663  | 9.4880439789320263  | 4.4445671799775823  | Si7  |
| 5.0430100531218809  | 2.8400729687939439  | 22.7056059305844080 | Si8  |
| -2.1930947084792276 | 9.4479222667414220  | 4.4550107866080868  | Si9  |
| 9.3197825494860727  | 2.8063433036881280  | 22.6852971722891041 | Si10 |
| -0.0177640264257453 | 5.7513740329505429  | 4.4537103667569999  | Si11 |
| 4.5990398586376298  | 2.4044879808726933  | 9.7166399906918013  | Si12 |
| 2.5215904297340446  | 9.8750878695835969  | 17.3902006223871162 | Si13 |
| 9.9080859208646324  | 2.6597587623549672  | 9.7107221264680721  | Si14 |
| -2.7609611891997794 | 9.6464789280126890  | 17.4051943923158277 | Si15 |
| 7.0281947568798318  | 7.1264198791414284  | 9.7026765459168534  | Si16 |
| 0.0780265341946738  | 5.1772994640410426  | 17.4383574391243918 | Si17 |
| 2.5973916926116125  | 9.7974016570003730  | 9.6967851805111369  | Si18 |
| 4.5203889850337644  | 2.5210522790686571  | 17.4061932277918281 | Si19 |
| -2.7048945207716661 | 9.7255156165632091  | 9.7001558058361113  | Si20 |
| 9.8309922092091178  | 2.5957307926473501  | 17.4252995818167236 | Si21 |
| 0.0068537283909849  | 5.1706581288466973  | 9.7021390629349682  | Si22 |
| 7.1138266361789100  | 7.1614301946378385  | 17.4868306004970115 | Si23 |
| 2.6461295634546178  | 1.5019126686406694  | 12.0095058652674940 | Si24 |
| 4.4700882357129377  | 10.7610827002379761 | 15.1034839756548536 | Si25 |
| 11.6376880531856859 | 1.4136868252328356  | 12.0200937601159126 | Si26 |
| -4.4944842575030135 | 10.8685590674658048 | 15.1064591578672722 | Si27 |
| 7.2375022960329405  | 9.2304036583699514  | 12.0299415142283799 | Si28 |
| -0.1129832556040404 | 3.0355395728358920  | 15.1117421385072408 | Si29 |
| 4.4961046602317154  | 10.7819632332647650 | 11.9890997590410890 | Si30 |
| 2.6381373165222373  | 1.4913232928169167  | 15.1248929063694959 | Si31 |
| -4.5120555098099526 | 10.8798754718071251 | 11.9842406317716250 | Si32 |
| 11.6172457057894007 | 1.4012061908775522  | 15.1352782042488396 | Si33 |
| -0.1018591345519626 | 3.0563134135913987  | 12.0201131569927746 | Si34 |
| 7.2362795903205726  | 9.2346899292284839  | 15.1311319683328573 | Si35 |
| -1.5114599483477376 | 12.3905111844916149 | 5.0188698001991963  | Si36 |
| 1.4628843401658109  | 12.4314836064063527 | 22.0717319479943015 | Si37 |
| 11.5235020081432005 | 4.8807720772622449  | 5.0240848285011577  | Si38 |
| 10.0431110517766022 | 7.5214884729844442  | 22.1582539507957854 | Si39 |
| 4.2914046015124647  | 7.4201275383076446  | 5.0108596349143939  | Si40 |
| 2.8127120342123031  | 4.8933252169115766  | 22.1356233502742761 | Si41 |
| 1.6354772286526611  | 12.4104215678906478 | 5.0880225275210975  | Si42 |
| -1.6876196656409510 | 12.4662068774549279 | 21.9964346051994042 | Si43 |
| 9.9401119191252860  | 7.5859211911735906  | 5.0967686887668480  | Si44 |
| 11.5910366190477099 | 4.7610017909785176  | 22.0399780322959806 | Si45 |
| 2.7407647870483913  | 4.6868612630590372  | 5.0914470162787620  | Si46 |
| 4.3627898035573063  | 7.6349989245255756  | 22.0729217857974014 | Si47 |
| -1.5564630913189923 | 12.3123056803743172 | 8.2381044336396059  | Si48 |
| 1.5141837124808433  | 12.4915232844767630 | 18.8657169424538509 | Si49 |

---

---

|                     |                     |                     |      |
|---------------------|---------------------|---------------------|------|
| -2.8108388409759391 | 4.8793855636860650  | 8.2473951419305074  | Si50 |
| 9.9209012957216380  | 7.5094657858722229  | 18.9395650442667822 | Si51 |
| 4.2518144702270622  | 7.5052945888719345  | 8.2311900394258011  | Si52 |
| 2.8537334645101473  | 4.7824674366459226  | 18.9174072975175207 | Si53 |
| 1.5887673957541928  | 12.4778980977043688 | 8.3125276834053121  | Si54 |
| -1.6404922239634878 | 12.3448904638565580 | 18.7789739974509899 | Si55 |
| 9.9122644912807072  | 7.5085168110037745  | 8.3251420368937428  | Si56 |
| 11.6148705373333812 | 4.8444542853752859  | 18.8210883734124828 | Si57 |
| 2.8304724095753611  | 4.7009952170285576  | 8.3173014533122043  | Si58 |
| 4.2720705477481493  | 7.5984551592179237  | 18.8456164139828424 | Si59 |
| 7.1702306480712146  | 4.0649328052005478  | 2.5567193545079858  | Si60 |
| -0.0247364469973261 | 8.1913144146024894  | 24.5762240887695000 | Si61 |
| -0.0419446077719110 | 8.2149498530684006  | 2.5809718517899154  | Si62 |
| 7.1830501039331338  | 3.9513340493140805  | 24.6240310956243249 | Si63 |
| 7.1709508665453265  | 4.0608724078111713  | 6.2955364923646293  | Si64 |
| -0.0386435079008738 | 8.2153779749964109  | 20.8239468486927279 | Si65 |
| -0.0357595112294016 | 8.2325994205503168  | 6.3307680470050416  | Si66 |
| 7.1814191145071433  | 4.0694123576754713  | 20.8227229489274706 | Si67 |
| 7.1756582160468403  | 4.0582601488020096  | 9.5238159996961951  | Si68 |
| -0.0444774639558849 | 8.2148294950083738  | 17.5963494773700191 | Si69 |
| -0.0322161334946287 | 8.2327548792440766  | 9.5641305373781016  | Si70 |
| 7.1547370850666230  | 4.0574802885402477  | 17.5976071724762306 | Si71 |
| 7.1855989061991528  | 6.5366066905338087  | 22.7787258521987397 | All  |
| 7.8069301443473318  | 4.4381996482567336  | 0.4260184046510382  | H1   |
| -0.0473488842354062 | 8.9474952082414028  | 0.4493962817636283  | H2   |
| -0.0026224841020124 | 8.9226391186671368  | 26.7062982778647928 | H3   |
| 7.2872651380726206  | 4.5830356033286765  | 26.7589156770929151 | H4   |
| 5.9121888543019141  | 11.7620125580375756 | 21.3736866431036496 | H5   |
| 6.7870299227628621  | 9.7389185919478223  | 22.4939901518114205 | H6   |
| 7.3976647882642688  | 9.7941015780451579  | 24.9393133993185998 | H7   |
| 5.7320196410552633  | 9.5517527025919637  | 24.4730530809654745 | H8   |
| 5.1215937202337694  | 11.8709070537945234 | 25.1107378815155684 | H9   |
| 6.7883908595900717  | 12.2555365053082568 | 25.5154709102764912 | H10  |
| 6.7623488443867519  | 10.4089205266277389 | 27.2606703141828000 | H11  |
| 5.0647840078230510  | 10.1166604986227551 | 26.8834202072530424 | H12  |
| 13.4548973132620890 | 0.2573873221022130  | 27.9401940326413936 | H13  |
| 11.7603998997553436 | 0.0243816936100392  | 27.5131995818903228 | H14  |
| 6.0243659585959231  | 10.9143445335790581 | 29.6765192138813205 | H15  |
| 4.3151081348286402  | 10.7597756152499215 | 29.2692899254463157 | H16  |
| 11.1941891943792662 | 0.6986223430527305  | 29.8969082308188199 | H17  |
| 12.8915670099659732 | 0.7920299223117224  | 30.3628108741060174 | H18  |
| 5.2769066278264756  | 11.4817264496814868 | 32.0934880814719108 | H19  |
| 3.5729616063439664  | 11.4438974900624402 | 31.6372865283478220 | H20  |
| 12.2783985363382797 | 1.3866449192173309  | 32.7672395822013485 | H21  |

---

|                         |                     |                     |     |
|-------------------------|---------------------|---------------------|-----|
| 10.5869199053535308     | 1.3893261776265160  | 32.2697385150878020 | H22 |
| 4.5433807680881086      | 12.1147160555446689 | 34.4876925505814924 | H23 |
| 2.8515430306401743      | 12.1393259350644609 | 33.9938889267611941 | H24 |
| 10.4017795909547495     | 1.0600427703977602  | 36.0389310419279454 | H25 |
| 9.9038232297408531      | 2.0784617619929011  | 34.6705206007094375 | H26 |
| 4.7788826013906887      | 11.2725086194604387 | 22.6443881397482230 | H27 |
| 13.0578999130463398     | 0.1628695724614171  | 22.9113360535441331 | H28 |
| 11.6047119618245063     | 2.0449448190385167  | 35.1775747951605737 | H29 |
| -5.8863072771801219     | 10.2821611496961243 | 20.8275741723399399 | H30 |
| -5.5679077635564571     | 12.4694007623153382 | 19.6570029372641990 | H31 |
| 1.6799422541174875      | 2.0698125347971388  | 20.9862501405248274 | H32 |
| 1.6187779958495192      | 2.0337844988797444  | 23.4543049233071166 | H33 |
| -5.7787280506946406     | 12.3472360481432695 | 24.6477808777365510 | H34 |
| -5.5456984011015837     | 10.2685095406622278 | 23.2726913935400823 | H35 |
| 5.7909646881835757      | 11.6627946715288839 | 22.4597667711405826 | C1  |
| 6.7716491569787998      | 10.6783828878263858 | 23.0631677787267861 | C2  |
| 6.5221455603383829      | 10.3238616161353161 | 24.5282116990639913 | C3  |
| 6.0600157674977826      | 11.4251231384515055 | 25.4800867282081391 | C4  |
| 5.8403197751637874      | 10.9032353779396800 | 26.9039975199930375 | C5  |
| 5.4368788585783863      | 11.9968460449753120 | 27.8938540876144536 | C6  |
| 5.1510640815824233      | 11.4818977648831044 | 29.3062030670092177 | C7  |
| 12.0327352389338174     | 0.0993692116749049  | 30.2960010338888672 | C8  |
| 4.4552605985461042      | 12.1071391509543655 | 31.6987027083744124 | C9  |
| 11.3834900720420418     | 0.7430522068164868  | 32.6822214970921650 | C10 |
| 10.9712813423838060     | 0.2698113791355251  | 34.0772566886105182 | C11 |
| 10.7055131767772185     | 1.4224271023138617  | 35.0454809064092956 | C12 |
| -5.8351486319380239     | 11.2196682788120778 | 21.3877627072920866 | C13 |
| -5.6740797856327330     | 12.4242560725670010 | 20.7418852526042272 | C14 |
| 1.5759118275648178      | 1.1112109945162423  | 21.5011629724161857 | C15 |
| 1.5225429076411741      | 1.0973680868432047  | 22.9050768618643694 | C16 |
| -5.8058031957991760     | 12.3886553560138726 | 23.5589035366787272 | C17 |
| -6.0152550264238611     | 11.1591551131533819 | 22.8262925819009865 | C18 |
| Adsorbed dodecylbenzene |                     |                     |     |
| 7.0518856800082581      | 4.1132294722490865  | 0.7523210191251072  | O1  |
| -0.0755498252503406     | 8.2312913054149117  | 0.7793173181865374  | O2  |
| 5.7673201716039504      | 3.4128720373605872  | 2.9054613251628152  | O3  |
| 0.9697034465778023      | 9.3538981896721118  | 23.9040781403203830 | O4  |
| 8.4468930304825243      | 3.3843246668754565  | 2.9326570240961889  | O5  |
| -1.6163125027525234     | 8.7584941755778232  | 23.7181435414443129 | O6  |
| 7.1476636054012639      | 5.7083680837792539  | 2.9185386332135947  | O7  |
| 0.1504707696087944      | 6.7913863476430985  | 23.8336162760218500 | O8  |
| 1.1169951737476520      | 9.2984730372243334  | 2.9453056458191114  | O9  |
| 5.7312235418151314      | 3.3778336547131769  | 23.8710364245769391 | O10 |
| -1.5169426382948772     | 8.9251251756866132  | 2.9451061775478000  | O11 |

---

|                     |                     |                     |     |
|---------------------|---------------------|---------------------|-----|
| 8.3858806731050830  | 3.2410565082248373  | 23.7940454790382674 | O12 |
| 0.1241196738623351  | 6.8096138754995064  | 2.9551341465255576  | O13 |
| 7.1767341873254846  | 5.6254119544718675  | 24.0859851418684947 | O14 |
| 4.8990965876730259  | 1.2626654180260426  | 4.2135809553035601  | O15 |
| 2.2445914397331892  | 11.2544337489726143 | 22.5261769741536249 | O16 |
| 10.7584131121536224 | 3.6772714579375094  | 4.2245717777397012  | O17 |
| -3.8231440597658937 | 9.0966946252446608  | 22.3007499005557541 | O18 |
| 5.7281739272472425  | 7.5479052307970909  | 4.2384197147571196  | O19 |
| 1.1993618106323845  | 4.8137057024134586  | 22.4180804839105221 | O20 |
| 2.3393736332496058  | 11.2100334186661090 | 4.3381401039788283  | O21 |
| 4.7923106877400894  | 1.2068504813593761  | 22.6459952621668990 | O22 |
| -3.7936774600111338 | 8.9841610489535135  | 4.3289786635970939  | O23 |
| 10.6903093085023251 | 3.7737239963445126  | 22.5341110807187910 | O24 |
| 1.1932704504987592  | 4.7971430563341562  | 4.3355221511302133  | O25 |
| 5.6319209631328109  | 7.7111567575973377  | 22.7819393061901216 | O26 |
| -1.4454939239395856 | 5.0443296137680926  | 22.5683593766005188 | O27 |
| 8.3644307654071817  | 7.6472564116482395  | 4.2734500385154188  | O28 |
| -2.1389748180044226 | 11.1118265161148511 | 22.6194453749429094 | O29 |
| 9.5162740880334820  | 1.3505028556833192  | 4.2856606042790233  | O30 |
| 3.2830193313549394  | 8.8050567770202655  | 22.7579542638792489 | O31 |
| 3.4906968900206601  | 3.4964485728920658  | 4.2878651103065399  | O32 |
| 8.3844607795974539  | 7.7190021895811674  | 22.4411611818512355 | O33 |
| -1.4366826279315272 | 5.0449931480445978  | 4.1947709114453442  | O34 |
| 9.5715187122611596  | 1.3977163312513838  | 22.3083030128079649 | O35 |
| -2.2718219862117381 | 11.1434133629020842 | 4.2080271527782003  | O36 |
| 3.4789446722967536  | 3.4909545855532658  | 22.4530171034901258 | O37 |
| 3.4239565247378554  | 8.8033903874212243  | 4.1868851124455677  | O38 |
| 5.8193007113166546  | 3.3553719659717900  | 5.5772383710555475  | O39 |
| 1.1707040503538346  | 9.1997825043348129  | 21.2235449086043140 | O40 |
| 8.4937242267620370  | 3.4287045451347291  | 5.6074058495936576  | O41 |
| -1.4802773549388730 | 9.0451933502488000  | 21.0510886774938974 | O42 |
| 7.0918985059256467  | 5.7076278418077040  | 5.5940951524421116  | O43 |
| -0.0124521972885239 | 6.8061850605652259  | 21.1611324685581756 | O44 |
| 1.1971463594473448  | 9.1797250430043675  | 5.6174387769571785  | O45 |
| 5.8096160902679763  | 3.1438359185187870  | 21.1842731361893719 | O46 |
| -1.4735877421061896 | 9.0189477067926482  | 5.6204636778471597  | O47 |
| 8.4491885600074799  | 3.5366292881649293  | 21.1250062749291381 | O48 |
| 0.0006474480545791  | 6.7882556399864908  | 5.6255473304882146  | O49 |
| 6.7595591051969643  | 5.6357879588531237  | 21.2340750052010279 | O50 |
| 7.1105776754277255  | 4.1592255780040928  | 7.7200215608764591  | O51 |
| 0.0671222217122986  | 8.3122794516170870  | 19.0179326925433223 | O52 |
| -0.0916309157149771 | 8.3381734569470485  | 7.7523805925682838  | O53 |
| 6.9450008071542095  | 4.1389914116454323  | 19.0494899810250011 | O54 |
| -1.6918944981043458 | 12.4603333130300147 | 6.4463761690598256  | O55 |

---

---

|                     |                     |                     |     |
|---------------------|---------------------|---------------------|-----|
| 1.6677363578710311  | 12.4132578642761651 | 20.2131078430360809 | O56 |
| 11.5892444644600339 | 4.8921830669976627  | 6.4430179130142058  | O57 |
| 9.7814886474955394  | 7.7669652572757535  | 20.1663851239614225 | O58 |
| 4.2539075624028371  | 7.7120989648651026  | 6.4558078376100898  | O59 |
| 2.7726126130423503  | 4.8686119003659467  | 20.2661602315455838 | O60 |
| 8.8922794166648718  | 0.0645626846940177  | 6.5264228614626179  | O61 |
| -1.8156117642040988 | 12.4596012072703353 | 20.3591594372730924 | O62 |
| 9.7789181054428749  | 7.7279696650891907  | 6.5153877163031853  | O63 |
| -2.8012674889897609 | 4.8791566268147673  | 20.2983166711121612 | O64 |
| 2.6902515381599374  | 4.6733772085515044  | 6.5286005651857897  | O65 |
| 4.2695171597176751  | 7.7664107414295112  | 20.4805625443915069 | O66 |
| 0.0170307456780963  | 12.4959414423121249 | 4.4332129169644388  | O67 |
| 7.2145906033811222  | 0.1596049648630850  | 22.2849938184692462 | O68 |
| 10.6691377692127674 | 6.3293892082762850  | 4.4235518053057632  | O69 |
| -3.7009458950609626 | 6.4342094278504307  | 22.2555981961065008 | O70 |
| 3.4782586139943850  | 6.1513568678253288  | 4.4574681910519640  | O71 |
| 3.5172750193033901  | 6.1427785533844226  | 22.4618419936113085 | O72 |
| 7.1700892541742238  | 0.0116820772637487  | 8.5458107997571915  | O73 |
| 7.0613734080240791  | 0.0133889899175264  | 18.2732640474745232 | O74 |
| 10.7242078962714515 | 6.2913905947051356  | 8.5395432867577679  | O75 |
| 10.7439406686728134 | 6.2633428201097026  | 18.1934641188853945 | O76 |
| 3.5016861991212740  | 6.2205722663963581  | 8.5318493013939172  | O77 |
| 3.6097334573791038  | 6.4298393633256605  | 18.2861328312942035 | O78 |
| 4.7476880589722636  | 1.1447445728896757  | 8.6494809346219483  | O79 |
| 2.2295210662455274  | 11.3677991824518543 | 17.8785856896619819 | O80 |
| 10.9321448367413208 | 3.6256317902577915  | 8.6388593297937959  | O81 |
| -3.6542357092896260 | 8.9150653082196776  | 17.9980547341674821 | O82 |
| 5.7088073472201080  | 7.7278117078373194  | 8.6348409259661043  | O83 |
| 1.3030874398403727  | 5.1416183087810667  | 18.0916177916363168 | O84 |
| 2.3514907369474667  | 11.3390050943109575 | 8.7691948885961075  | O85 |
| 4.7839370274484647  | 1.4346780179460537  | 18.2712571712038745 | O86 |
| -3.9161422416385170 | 8.9530132234335777  | 8.7294891218331827  | O87 |
| 10.8565366938265981 | 3.5954293874589083  | 18.1402769326673940 | O88 |
| 1.2991596615138929  | 4.7223294707514691  | 8.7679857567745234  | O89 |
| 5.8821584333174339  | 7.8382516686720134  | 18.3850895622472557 | O90 |
| -1.3375649691026545 | 5.0071786025117753  | 18.1365676611447277 | O91 |
| 8.3377375088003287  | 7.4627749973387596  | 8.7048977912629262  | O92 |
| -2.5306088528877213 | 11.2982487780862133 | 18.1358282481703199 | O93 |
| 9.3960683929152005  | 1.4721807429412352  | 8.6909843980286183  | O94 |
| 3.5457254691471665  | 9.1135797683551178  | 18.3772093988695175 | O95 |
| 3.6719310450608735  | 3.5661038037933301  | 8.7000248952721631  | O96 |
| 8.4799815923101995  | 7.6373792416194544  | 17.8912544323088696 | O97 |
| -1.3116727382722229 | 5.1274151845864919  | 8.5462973263007882  | O98 |
| 9.2683703536298214  | 1.4909418005253727  | 18.1180959926549754 | O99 |

---

---

|                     |                     |                     |      |
|---------------------|---------------------|---------------------|------|
| -2.2417746694449665 | 10.9998500552713878 | 8.5389216374171433  | O100 |
| 3.5770690764050084  | 3.7820410417518016  | 18.0050442796140189 | O101 |
| 3.3173643874838543  | 8.8767521399052249  | 8.6095509270726467  | O102 |
| 6.0109726939172834  | 3.1209933600026099  | 9.9004056194511634  | O103 |
| 1.3806832004826086  | 9.0685796145658788  | 16.8366832162382565 | O104 |
| 8.5842065287938940  | 3.7160026809908095  | 9.8831085765698514  | O105 |
| -1.2334714016633521 | 9.3175148114527619  | 16.9388028874969159 | O106 |
| 6.7838194235155633  | 5.6454560103205473  | 9.8926040949200260  | O107 |
| -0.1393417757406099 | 6.9277488657466186  | 16.7555467084502823 | O108 |
| 1.0488661921343896  | 9.3386505266282978  | 9.9318697942152721  | O109 |
| 5.8834294403191638  | 3.3239892945675056  | 16.7596605443843991 | O110 |
| -1.5456692512210966 | 8.8355418183175960  | 9.9228052593867790  | O111 |
| 8.4925070367213866  | 3.7534789084298108  | 16.9289146501644900 | O112 |
| 0.1899859443302856  | 6.8410415786739556  | 9.9266906634317227  | O113 |
| 6.8035760617129197  | 5.7812059403181033  | 16.9589026058432530 | O114 |
| 3.8406235484164477  | 2.1166451862942353  | 10.9326635798360314 | O115 |
| 3.5774472939836821  | 10.1311879681891845 | 15.9402816607489317 | O116 |
| 10.5487535091550839 | 2.3710715444904285  | 10.9306408385479905 | O117 |
| -3.2746979453004723 | 10.3578554767193101 | 15.7743155126860284 | O118 |
| 6.9743587688758373  | 8.0133651182894372  | 10.9402032351850256 | O119 |
| -0.0185995439072886 | 4.4848805293309475  | 15.8807288736215888 | O120 |
| 3.3174648765067412  | 10.1344192928386221 | 10.9491635675433727 | O121 |
| 3.7060216057412245  | 2.1266100119096492  | 15.9406232733380246 | O122 |
| -3.3826087341993318 | 10.4569807710762763 | 10.8611220710358349 | O123 |
| 10.3822120171194339 | 2.3519256112038991  | 15.8394553062348820 | O124 |
| -0.2817248104696315 | 4.4566986178035881  | 10.8916055755523242 | O125 |
| 6.7871496889524376  | 8.1648037954669164  | 15.9110787168770820 | O126 |
| 2.3058616413205812  | 0.0206787502445558  | 11.5535007498525353 | O127 |
| 11.5986512997400641 | 0.0755317537137738  | 15.3636634490426420 | O128 |
| 13.1301193267572636 | 2.1013094337789346  | 11.5694920011180287 | O129 |
| 8.5989684272023901  | 10.0059591270855304 | 15.3539334056000794 | O130 |
| 5.8828487935113989  | 10.3595360923531921 | 11.5817678452721307 | O131 |
| 1.1715673800180901  | 2.2439378080867569  | 15.1665607569504690 | O132 |
| 11.5740264029828879 | 0.0048822198015148  | 11.4538667334635775 | O133 |
| -4.8370490839886742 | 12.4404276319690918 | 15.2311604225177586 | O134 |
| 8.4892126605870288  | 10.1100475791032611 | 11.4148311370413431 | O135 |
| 12.9830609536892769 | 2.3260843700102884  | 15.3129749202370480 | O136 |
| 1.3041174104556550  | 2.4495983002606265  | 11.5549086579663598 | O137 |
| 6.0587698722640395  | 10.5936827027665803 | 15.1009020440825434 | O138 |
| 3.1121812758838563  | 1.7580160403028164  | 13.4102200499545710 | O139 |
| 3.9880096163535868  | 10.7512257326842029 | 13.4251669489642289 | O140 |
| 11.1968390458170504 | 1.8224442569784944  | 13.3950748126300425 | O141 |
| -4.1874490929463590 | 10.6725165268874740 | 13.3427990423661580 | O142 |
| 7.1726624024671670  | 8.8747726123814541  | 13.3982362036133313 | O143 |

---



---

|                     |                     |                     |      |
|---------------------|---------------------|---------------------|------|
| -0.1882888295804430 | 3.6929814034852622  | 13.3933470965459698 | O144 |
| -0.2159479462268186 | 8.3554453010598593  | 25.9987877905296578 | O145 |
| 7.1549078560569059  | 3.9105545444712351  | 26.0835950260042644 | O146 |
| 4.9953877180466417  | 2.8838571536549669  | 4.2378732676815352  | Si1  |
| 1.8986011108229386  | 9.6696537779845428  | 22.6088602521851705 | Si2  |
| 9.2997185138396041  | 2.9618964668818242  | 4.2552784451520038  | Si3  |
| -2.2657156011887007 | 9.5104774779535859  | 22.4232470675635760 | Si4  |
| 7.0809813727301547  | 6.6486488961469687  | 4.2483017003267802  | Si5  |
| -0.0449109146216058 | 5.8627739988868450  | 22.5029391677586119 | Si6  |
| 2.0207254027079093  | 9.6163573918790348  | 4.2651727739401872  | Si7  |
| 4.9678953089263418  | 2.8254664648602006  | 22.5510785697974363 | Si8  |
| -2.2591363627158083 | 9.5208659672859355  | 4.2691522322578050  | Si9  |
| 9.2589211584938482  | 2.9985675746210281  | 22.4468992064863926 | Si10 |
| -0.0348018015808007 | 5.8609124542508493  | 4.2701136049605957  | Si11 |
| 4.5571297767873391  | 2.4936531746382609  | 9.5337609299503878  | Si12 |
| 2.6797140871438598  | 9.9359570442459972  | 17.2698550743424093 | Si13 |
| 9.8643387020627298  | 2.7820916967419427  | 9.5246507701252465  | Si14 |
| -2.6877539271489761 | 9.9633841480419161  | 17.2313448481752545 | Si15 |
| 6.9635203773660370  | 7.2191625319980739  | 9.5312748736253887  | Si16 |
| -0.0517296670365281 | 5.3756476738767258  | 17.2256276027139954 | Si17 |
| 2.5174786171572459  | 9.9255292198055045  | 9.5547570399278516  | Si18 |
| 4.4809690102987147  | 2.6619389273231411  | 17.2544879431734159 | Si19 |
| -2.7776649437379595 | 9.8126225483519924  | 9.5048642251212740  | Si20 |
| 9.7523041826536385  | 2.7874431751927462  | 17.2682698358432809 | Si21 |
| -0.0253836137696104 | 5.2805104963190388  | 9.5230283832052525  | Si22 |
| 7.0036896575917140  | 7.3523561844971077  | 17.2991599476385609 | Si23 |
| 2.6363645473497779  | 1.5817494967303938  | 11.8629012451197529 | Si24 |
| 4.4967692366101231  | 11.0156834155180441 | 14.9505627971242738 | Si25 |
| 11.6169039409200323 | 1.5776562091531696  | 11.8440884205260950 | Si26 |
| -4.5363980392350367 | 10.8766822013625450 | 14.9153419459037782 | Si27 |
| 7.1235801788510944  | 9.3450142497743780  | 11.8396950290965730 | Si28 |
| -0.1273550970868904 | 3.1820072035801550  | 14.9369972821690595 | Si29 |
| 4.3900289021880914  | 10.9353197044991166 | 11.8572806064329743 | Si30 |
| 2.5998664251073089  | 1.5218557069032883  | 14.9359397475369740 | Si31 |
| -4.6076768336857787 | 10.9428942299899248 | 11.7959763091126710 | Si32 |
| 11.5497189351638987 | 1.6480619235104954  | 14.9728332726209317 | Si33 |
| -0.1146616211676565 | 3.1712316688254871  | 11.8541809404487317 | Si34 |
| 7.1526968138089124  | 9.4027674144592766  | 14.9381011594941171 | Si35 |
| -1.5625317017162743 | 12.4638454657389932 | 4.8368552787208010  | Si36 |
| 8.7733145057240769  | 0.0685058018991967  | 21.8212103354252100 | Si37 |
| 11.5033645317970983 | 4.9894358935627405  | 4.8334311120462328  | Si38 |
| 9.8479995025272995  | 7.7396814846166269  | 21.7908789018187754 | Si39 |
| 4.2194457984367615  | 7.5490472313662398  | 4.8476056129475458  | Si40 |
| 2.7374287356785381  | 4.8088264546180479  | 21.8810463501338894 | Si41 |

---

---

|                     |                     |                     |      |
|---------------------|---------------------|---------------------|------|
| 8.7945007919937659  | 0.0318933072917542  | 4.9109812524670211  | Si42 |
| -1.5932549451318643 | 12.4895820691117940 | 21.9585270856787460 | Si43 |
| 9.8665383800610389  | 7.6683328043361980  | 4.9005907391565824  | Si44 |
| 11.4925401791177659 | 5.0401839793673631  | 21.9014315196424114 | Si45 |
| 2.7161666303477712  | 4.7834170507498373  | 4.9144166110794556  | Si46 |
| 4.0932761654318419  | 7.5902689512596639  | 22.0592619449377096 | Si47 |
| -1.6024682803424319 | 12.4080542434813985 | 8.0581181435352427  | Si48 |
| 8.6566558244595253  | 0.0777466874764267  | 18.6159978472395160 | Si49 |
| -2.8493038201920466 | 4.989985758656102   | 8.0552905088843421  | Si50 |
| 9.9527186779007408  | 7.6424344017537233  | 18.5679899344522887 | Si51 |
| 4.1928989461734787  | 7.6253451876444736  | 8.0689528434819877  | Si52 |
| 2.8172917998006515  | 5.0490771765309219  | 18.6552609664645317 | Si53 |
| 8.7509151225371475  | 0.0926601799600885  | 8.1389229483609640  | Si54 |
| 5.4964585017854679  | 0.0595741894743345  | 18.7497400243833461 | Si55 |
| 9.8444588396311197  | 7.6046815932062284  | 8.1278770429969498  | Si56 |
| 11.5722187843478341 | 4.9435650858147637  | 18.6843719837169893 | Si57 |
| 2.7920532581250219  | 4.8041986837555459  | 8.1376500490988022  | Si58 |
| 4.3297015338786924  | 7.7765175285988972  | 18.8532940866907133 | Si59 |
| 7.1152280232275373  | 4.1617861734722839  | 2.3755325410540227  | Si60 |
| -0.1928738641265966 | 8.3020497240876150  | 24.3753977345195594 | Si61 |
| -0.0890504046685408 | 8.3290116229517182  | 2.4014277989279647  | Si62 |
| 7.1149081343999425  | 4.0622305956405498  | 24.4579241814131905 | Si63 |
| 7.1287054163381001  | 4.1629203787324869  | 6.1163373285976235  | Si64 |
| -0.0780208256031516 | 8.3400039434714710  | 20.6143911173115093 | Si65 |
| -0.0913424321663650 | 8.3311614236080445  | 6.1479115618165334  | Si66 |
| 6.9936191098761205  | 4.1498958443571583  | 20.6636768903582713 | Si67 |
| 7.1231252583680229  | 4.1598052703757347  | 9.3459752766438253  | Si68 |
| 0.0136921204002523  | 8.4075067497429554  | 17.3927401006162654 | Si69 |
| -0.1002620686407489 | 8.3388033311615377  | 9.3794668149133571  | Si70 |
| 7.0372701332583123  | 4.2498906667070724  | 17.4362444471061195 | Si71 |
| 7.1274117980395069  | 6.5651508643634537  | 22.6474788050221782 | All  |
| 7.7523625664254325  | 4.5546816959217109  | 0.2485661199291101  | H1   |
| -0.1067988979628156 | 9.0529593072171792  | 0.2662442733518752  | H2   |
| -0.8179818840951461 | 7.7623338493905685  | 26.4734752831222302 | H3   |
| 7.1000863973425385  | 3.0163332509489837  | 26.4533748745605557 | H4   |
| 4.6515614756092205  | 10.9824394353588648 | 20.2245426034102280 | H5   |
| 12.5528527590335983 | 0.1420547327043195  | 22.0360139845515555 | H6   |
| 0.5332023797775878  | 0.0682519913065927  | 22.7787946335068590 | H7   |
| 7.8802282975879336  | 10.9353550910339568 | 22.1315778399004195 | H8   |
| 6.1367838004548423  | 10.1454690131100822 | 23.7869825192319979 | H9   |
| 5.8500670450756544  | 11.7978079069827650 | 24.2826743806033178 | H10  |
| -6.1697558389173386 | 11.9699207617857599 | 25.0248024413520938 | H11  |
| -5.9259830455373672 | 10.2769410708506630 | 24.6023374437620745 | H12  |
| 6.4157208967388213  | 11.2530709942143297 | 26.6390612788877412 | H13  |

---

|                                         |                     |                     |     |
|-----------------------------------------|---------------------|---------------------|-----|
| 6.8541818282096720                      | 9.5702186701294991  | 26.3308835615423789 | H14 |
| -5.6704523794696531                     | 11.7370175650939146 | 27.3839436838950192 | H15 |
| -5.2294403766362407                     | 10.0517535099412125 | 27.1178169388175121 | H16 |
| 7.5870556590789082                      | 9.3213644181735802  | 28.8768902178350402 | H17 |
| 7.0334249878943655                      | 10.9841640473424302 | 29.0869678012928681 | H18 |
| -5.1076911543892551                     | 11.6805013216968128 | 29.8112020724333604 | H19 |
| -4.5170566114839419                     | 10.0360726077073448 | 29.5787876867909425 | H20 |
| 7.7129658597156929                      | 10.8339897002524790 | 31.5702893579539712 | H21 |
| 8.3557818170341918                      | 9.2052452408800338  | 31.3556630481393626 | H22 |
| -4.4563965296771819                     | 11.6532153907728553 | 32.2631779908671987 | H23 |
| -3.7850550797732985                     | 10.0425671410597328 | 32.0180036907485572 | H24 |
| -4.2718924100485962                     | 10.4411286131795258 | 34.4524449707712961 | H25 |
| 9.1422508596347534                      | 9.1250777445435407  | 33.8304568418283012 | H26 |
| 6.0649306238455818                      | 9.9935865510039203  | 20.6617123620878722 | H27 |
| 4.7750495149732251                      | 10.3167509706058542 | 21.8516123902672526 | H28 |
| -5.9824013489097920                     | 10.7423987145734383 | 34.0746575208109590 | H29 |
| 6.9724640433980714                      | 11.1735636387438522 | 19.0262526432595251 | H30 |
| 5.8650811118514614                      | 8.6242720830662414  | 23.0696296173905218 | H31 |
| -0.6823883279388187                     | 2.1457519580138822  | 21.5478575360095306 | H32 |
| 0.3947550268410183                      | 3.5368148480957959  | 19.8135377800249017 | H33 |
| 1.1859445846077330                      | 2.4964926063583937  | 17.6879086237987622 | H34 |
| 0.8287751659973875                      | 0.0691639144153998  | 17.2908843544217810 | H35 |
| 5.3581016619565300                      | 10.7515395793162050 | 21.0346616036663043 | C1  |
| 6.0800218500722112                      | 11.9958167225082928 | 21.5329128375316223 | C2  |
| 7.1671365438576338                      | 11.6543002938033364 | 22.5734955076764798 | C3  |
| 6.6449465331790920                      | 11.1274421005446769 | 23.9081069342967574 | C4  |
| 7.7472454405442450                      | 10.9954596857389966 | 24.9558657385275922 | C5  |
| 7.2582916574561800                      | 10.5988883171514985 | 26.3486801113761047 | C6  |
| -6.0725631919578094                     | 10.7071516591007754 | 27.4021194319819159 | C7  |
| 7.9180015395654664                      | 10.3743614744785653 | 28.8266282842963584 | C8  |
| -5.4136766179797782                     | 10.6190500921608084 | 29.8587763589754722 | C9  |
| -5.8070648271439884                     | 10.2752558040789754 | 31.2949846061234958 | C10 |
| -4.7051131188414281                     | 10.5782531409748444 | 32.3124647013318693 | C11 |
| -5.0803534377304187                     | 10.2028304079986274 | 33.7451481645016500 | C12 |
| 7.1166156382213392                      | 12.2402248245606415 | 19.2112675898736747 | C13 |
| 13.9055315567782571                     | 0.3114397162838851  | 20.4172416251893019 | C14 |
| -0.3403366451016138                     | 1.6857713865565371  | 20.6159723090761489 | C15 |
| 0.2713934289947753                      | 2.4687235723394809  | 19.6437073780248568 | C16 |
| 0.7039604348038691                      | 1.8873414250802172  | 18.4498159118511147 | C17 |
| 0.5105150202268569                      | 0.5238749429611129  | 18.2303479317644914 | C18 |
| Co-adsorption of 1-dodecene and benzene |                     |                     |     |
| 7.1359752138800800                      | 3.9618247829791424  | 1.0069189426899658  | O1  |
| 0.0308477091463386                      | 8.0754600583052039  | 1.0234505753813650  | O2  |
| 5.8545490168081145                      | 3.2849025432051944  | 3.1666965012007418  | O3  |

---

|                     |                     |                     |     |
|---------------------|---------------------|---------------------|-----|
| 1.1283963068119505  | 9.1599369681528398  | 24.0713050266317623 | O4  |
| 8.5343535072016650  | 3.1875145477821660  | 3.1711795220013870  | O5  |
| -1.4774918121589082 | 8.6893031197388151  | 24.1071898234597057 | O6  |
| 7.3009026822991991  | 5.5433800487388929  | 3.1790008137961334  | O7  |
| 0.2260980959822829  | 6.6304638083612817  | 24.0972678013204842 | O8  |
| 1.2195232121336010  | 9.1212830195961931  | 3.2018818354768381  | O9  |
| 5.9461304166200399  | 3.0306475151029839  | 24.1501920458564179 | O10 |
| -1.4143672778286507 | 8.7558028787413669  | 3.1912091699271410  | O11 |
| 8.5973182768154430  | 3.2821446928780706  | 24.1143950587252078 | O12 |
| 0.2204603523724198  | 6.6351741389696395  | 3.1887541414775802  | O13 |
| 7.0680363016176599  | 5.4669471887565697  | 24.3265268559148566 | O14 |
| 5.0113087467598030  | 1.1050225423685303  | 4.4477991526219602  | O15 |
| 2.3759941244630918  | 11.1258358403451716 | 22.7691710070522717 | O16 |
| 10.8423492986848053 | 3.5215458575034959  | 4.4662055431561738  | O17 |
| -3.7070842583372512 | 8.8884157908108286  | 22.6661325140544072 | O18 |
| 5.8271686265035143  | 7.3639003542741337  | 4.4589631402667242  | O19 |
| 1.4114279365628017  | 4.6838657744943708  | 22.7538205573636709 | O20 |
| 2.4395824082810300  | 11.0406866957225063 | 4.5778484826051571  | O21 |
| 4.8722894687755787  | 1.0157456455026865  | 22.7981765592239434 | O22 |
| -3.6874165462708741 | 8.8244355536553982  | 4.5775313859336633  | O23 |
| 10.8947021151467833 | 3.5878732671477263  | 22.8071519376805441 | O24 |
| 1.2808972950026005  | 4.6284540813868853  | 4.5836138400010196  | O25 |
| 5.7975753481114163  | 7.6530835360356368  | 22.8636363311527866 | O26 |
| -1.2281276258278975 | 4.8398491226434102  | 22.7380388432704343 | O27 |
| 8.4629593725273793  | 7.4962677320091089  | 4.5641039070679126  | O28 |
| -2.0631683225700179 | 10.9413778550860705 | 22.8529853818776445 | O29 |
| 9.6218975532073721  | 1.1806215527389472  | 4.5409078031834840  | O30 |
| 3.4336443344464769  | 8.7022329375684428  | 22.8569989415480954 | O31 |
| 3.5759782697314852  | 3.3245804966245758  | 4.5459235000622531  | O32 |
| 8.5720047999646809  | 7.4148342066728947  | 22.7969533411933689 | O33 |
| -1.3493854916357193 | 4.8842672119479156  | 4.4345897587143188  | O34 |
| 9.6337178829121140  | 1.2725027696086446  | 22.7070997050236407 | O35 |
| -2.1658745825955901 | 10.9843527461835464 | 4.4381618575610604  | O36 |
| 3.6930519306300695  | 3.3772789287501390  | 22.7799118774479332 | O37 |
| 3.5322946172953822  | 8.6345115356561877  | 4.4355828648452356  | O38 |
| 5.9024601733479471  | 3.1925860308688061  | 5.8376484254114231  | O39 |
| 1.2602489835698041  | 9.1348149868098911  | 21.3894167409902032 | O40 |
| 8.5780758418919980  | 3.2586866902029077  | 5.8447607976746898  | O41 |
| -1.3779457557690740 | 8.7840983491323943  | 21.4228865934263375 | O42 |
| 7.1810391421464921  | 5.5414989490365167  | 5.8508833248847258  | O43 |
| 0.2479574501912505  | 6.6599382046437849  | 21.4252840006802536 | O44 |
| 1.3092051147704735  | 9.0106726380119184  | 5.8730358570069008  | O45 |
| 5.9912951773548055  | 2.9676817209166724  | 21.4519670667895923 | O46 |
| -1.3632098378058437 | 8.8713975385512978  | 5.8650400857679905  | O47 |

---

---

|                     |                     |                     |     |
|---------------------|---------------------|---------------------|-----|
| 8.6258446066368428  | 3.4047352616408024  | 21.4321962255678393 | O48 |
| 0.0920102660462931  | 6.6286761659459605  | 5.8607910722570598  | O49 |
| 6.8959868826195114  | 5.4752769289295085  | 21.4471048460916833 | O50 |
| 7.2169336023979174  | 3.9854617329171504  | 7.9703760293450001  | O51 |
| 0.0245356102119061  | 8.1672808434781867  | 19.2785205296631581 | O52 |
| 0.0048452923569773  | 8.1644506915446318  | 7.9971430865681281  | O53 |
| 7.1703098146618007  | 3.9135999427603800  | 19.3148526554759066 | O54 |
| -1.6384784707779732 | 12.2928036353393004 | 6.6934428404450106  | O55 |
| 1.8345494342434163  | 12.3891878653321310 | 20.5107959708800571 | O56 |
| 11.7019558399688677 | 4.6992887174114895  | 6.6958312546656105  | O57 |
| 9.9025869494603320  | 7.6081781655468532  | 20.4928467131377552 | O58 |
| 4.3857924872552321  | 7.5214163966572487  | 6.6928780795949239  | O59 |
| 2.8774611849577365  | 4.5872975066025736  | 20.5451575631298056 | O60 |
| 1.8085771499770491  | 12.3836205755473010 | 6.7786262417810859  | O61 |
| -1.6482344516913514 | 12.2074469136350849 | 20.5630689665046553 | O62 |
| 9.9112807271995269  | 7.6116510493249665  | 6.7872782638033344  | O63 |
| 11.7337628552984654 | 4.6508459329140939  | 20.5322107019598477 | O64 |
| 2.7706478440581339  | 4.5108233070051700  | 6.7816466349603024  | O65 |
| 4.3661007098640647  | 7.6383788291373031  | 20.5966988612573232 | O66 |
| 0.1183165005432487  | 12.3316144141134529 | 4.7149676827335281  | O67 |
| 0.0978942111773495  | 12.4732395306259480 | 22.5383327995947731 | O68 |
| 10.7615541120851699 | 6.1689532541147711  | 4.7096409781516515  | O69 |
| -3.4611559376403873 | 6.2525663155815456  | 22.5133114683362656 | O70 |
| 3.5670832582294758  | 5.9805911686060833  | 4.7051853672417865  | O71 |
| 3.7133151041042418  | 6.0272369491410451  | 22.6198971885714144 | O72 |
| 0.0456156805884316  | 12.3257464079672427 | 8.7658371445595336  | O73 |
| 0.0694168112324824  | 12.3696267060501288 | 18.5194945808573763 | O74 |
| 10.8355219685723387 | 6.1214839953553195  | 8.7831615536902969  | O75 |
| 10.8641815412028482 | 6.1396015398772859  | 18.4881613268418512 | O76 |
| 3.5986357688862256  | 6.0547380588898090  | 8.7789643099741674  | O77 |
| 3.6392045139778451  | 6.1101304782683385  | 18.5243959389456876 | O78 |
| 4.8459282812801483  | 0.9724328217299057  | 8.9118805610272620  | O79 |
| 2.4811911728150946  | 11.2425007821377232 | 18.2320246543672155 | O80 |
| 11.0281806808508538 | 3.4528685636613354  | 8.8929630167645186  | O81 |
| -3.7869789922595474 | 8.7980572810752502  | 18.2614539647443230 | O82 |
| 5.8053782355491821  | 7.5664436544659450  | 8.8925531802133371  | O83 |
| 1.4540140450832033  | 4.5844351618403865  | 18.3144523001961055 | O84 |
| 2.4533140542417131  | 11.1795463652024374 | 9.0343975296316241  | O85 |
| 4.8675096207975237  | 0.9994114205529809  | 18.3799842002443832 | O86 |
| -3.8254501974631845 | 8.7779770680000642  | 9.0462692448981432  | O87 |
| 11.1008310424152281 | 3.4804940841064984  | 18.2650103432593767 | O88 |
| 1.4034647160112637  | 4.5416854911897362  | 9.0382143247863098  | O89 |
| 5.8415565887013470  | 7.6329357736313650  | 18.4233218202121094 | O90 |
| -1.1638633852360165 | 4.9900440692404668  | 18.4478165487716517 | O91 |

---

---

|                     |                     |                     |      |
|---------------------|---------------------|---------------------|------|
| 8.4386418531504219  | 7.2764197432277209  | 8.9422680516856463  | O92  |
| -2.1161746099685219 | 10.8523523342241752 | 18.3933233064034738 | O93  |
| 9.4703523225730919  | 1.3100418600110937  | 8.9404342469163200  | O94  |
| 3.4328610344037367  | 8.7704660431876231  | 18.4609002167310123 | O95  |
| 3.7807457276057410  | 3.3992067848418266  | 8.9417268680741167  | O96  |
| 8.4718899931587082  | 7.3005685394627147  | 18.3100489571330520 | O97  |
| -1.2080202114061716 | 4.9438475143998835  | 8.8054204448384787  | O98  |
| 9.4883597007147422  | 1.3740094847026576  | 18.3891570880682416 | O99  |
| -2.1593358599925949 | 10.8288384335178041 | 8.7957614911714170  | O100 |
| 3.8424931945677492  | 3.4498316248815328  | 18.3833278568032057 | O101 |
| 3.4107172535251289  | 8.7135151463398941  | 8.8055631963401062  | O102 |
| 6.1149020254920279  | 2.9496362586003397  | 10.1505885979793575 | O103 |
| 1.1714018922786158  | 9.2182454287231277  | 17.1270683929694520 | O104 |
| 8.6848658831353127  | 3.5562014903667403  | 10.1402232686267340 | O105 |
| -1.4044660894768466 | 8.6341916326629260  | 17.0942215253846079 | O106 |
| 6.8743695959053213  | 5.4774567317825928  | 10.1381912464112727 | O107 |
| 0.3891698879376619  | 6.6919700131707982  | 17.1061672241610978 | O108 |
| 1.1659282147503722  | 9.1599906956190758  | 10.1687565058897889 | O109 |
| 6.1119571609877230  | 2.9651767222062921  | 17.0809570664930384 | O110 |
| -1.4287252070246259 | 8.6723671466508065  | 10.1771144177628514 | O111 |
| 8.6822420002409224  | 3.6050077215730618  | 17.1609092929702420 | O112 |
| 0.2929885925365103  | 6.6690836265779376  | 10.1722508443916233 | O113 |
| 6.8463874740949677  | 5.4982947201307759  | 17.1960236076934549 | O114 |
| 3.9413140181081001  | 1.9665549280860708  | 11.1900011427745589 | O115 |
| 3.4608453706536375  | 9.9685945520183701  | 16.1052304943721758 | O116 |
| 10.6398604043720244 | 2.1840473111034955  | 11.1772321573030258 | O117 |
| -3.2139374602116453 | 10.2073654555590956 | 16.0700597669859917 | O118 |
| 7.0996131644311626  | 7.8484475483965248  | 11.1826845511009232 | O119 |
| -0.0571334255279772 | 4.3159306222200806  | 16.1321714069188715 | O120 |
| 3.4626271876866976  | 9.9236710904758958  | 11.1620050635558492 | O121 |
| 3.8724414937237439  | 2.0107164659007246  | 16.1449343092476951 | O122 |
| -3.2373458764685568 | 10.2960302939055168 | 11.1572365861840836 | O123 |
| 10.5248103644664646 | 2.1311926846504026  | 16.0594520987000777 | O124 |
| -0.1875480655105237 | 4.2970032021276952  | 11.1636392822968809 | O125 |
| 7.0893231772279091  | 7.8462899464656930  | 16.0962237742147281 | O126 |
| -4.7944962638637101 | 12.3568819819114530 | 11.7920943534024243 | O127 |
| 4.5107532776582344  | 12.3328316043509947 | 15.5802591867750255 | O128 |
| 13.2278610868577982 | 1.9212367270669264  | 11.7797433861303755 | O129 |
| 8.6390478190030073  | 9.9237467168903155  | 15.6025970057867731 | O130 |
| 6.0268385274229406  | 10.2105790657502542 | 11.7995864259103662 | O131 |
| 1.3154335390282390  | 2.1511836474368033  | 15.5053477469724825 | O132 |
| 4.4531192339330463  | 12.3128568795894360 | 11.6716983230781572 | O133 |
| -4.7245335408580349 | 12.3184561356909832 | 15.5243508986777190 | O134 |
| 8.6319064001716690  | 9.9332039333533011  | 11.6629761423965448 | O135 |

---

---

|                     |                     |                     |      |
|---------------------|---------------------|---------------------|------|
| 13.1321239202742195 | 2.0474473109668683  | 15.5609618607836300 | O136 |
| 1.3956974950822782  | 2.2763462262471066  | 11.7760762464597821 | O137 |
| 6.0331101604605752  | 10.2090156341105001 | 15.4741612622873053 | O138 |
| 3.1684059834579323  | 1.6098172067287866  | 13.6613244039960797 | O139 |
| 4.1200107485124216  | 10.5288448827626340 | 13.6349809258440722 | O140 |
| 11.3308880427622380 | 1.6084775640359505  | 13.6282795946766662 | O141 |
| -4.0945345798159130 | 10.5461546156509680 | 13.6258893300345303 | O142 |
| 7.2816519688843586  | 8.7300217962501812  | 13.6359144802402401 | O143 |
| -0.0930773412662738 | 3.4690458329279883  | 13.6510817346055724 | O144 |
| 0.0174278067548022  | 8.0613396919774285  | 26.2641957527074581 | O145 |
| 7.1693821449322748  | 3.6698535288147109  | 26.3520308342866194 | O146 |
| 5.0867735691306377  | 2.7274093569765987  | 4.4905151263600933  | Si1  |
| 2.0340993060185903  | 9.5378633260501378  | 22.7748506244491296 | Si2  |
| 9.3919903256522659  | 2.7895563474447975  | 4.4987784850771995  | Si3  |
| -2.1522730443513298 | 9.3278695235382383  | 22.7647067391522455 | Si4  |
| 7.1917613458862650  | 6.4834054906843956  | 4.5059425690540120  | Si5  |
| 0.1456009315378113  | 5.7036068118990899  | 22.7580098174248384 | Si6  |
| 2.1278130504934216  | 9.4454673881917568  | 4.5165332141747463  | Si7  |
| 5.1389071091004697  | 2.6242343708367946  | 22.8060739769483298 | Si8  |
| -2.1535893763082181 | 9.3617814015428387  | 4.5121727651142933  | Si9  |
| 9.4196362722852456  | 2.8928405262070940  | 22.7723037865386644 | Si10 |
| 0.0558044981174084  | 5.6951832173622536  | 4.5098242918661215  | Si11 |
| 4.6581935937204673  | 2.3277160006780253  | 9.7866206894836107  | Si12 |
| 2.6415880159193916  | 9.8062677538162308  | 17.4922203144941868 | Si13 |
| 9.9559944959049496  | 2.6120414178988836  | 9.7755949436340632  | Si14 |
| -2.6368462976017888 | 9.6268986643851093  | 17.4680233148002380 | Si15 |
| 7.0661791430805163  | 7.0498055869946432  | 9.7765132328038149  | Si16 |
| 0.1528923704462248  | 5.1334710587209162  | 17.5119000920596939 | Si17 |
| 2.6305413987151445  | 9.7483119919501604  | 9.7822509894967151  | Si18 |
| 4.6647489114609986  | 2.3560885688800703  | 17.5110988982513547 | Si19 |
| -2.6690980476287334 | 9.6475570372631179  | 9.7849825055762203  | Si20 |
| 9.9473599099277514  | 2.6411195127886167  | 17.4846387905291571 | Si21 |
| 0.0755244545462861  | 5.1054010621474166  | 9.7850836867315625  | Si22 |
| 7.0771981919951603  | 7.0715392335925600  | 17.5198736210816897 | Si23 |
| 2.7305403592564712  | 1.4217681920294827  | 12.1072575536350460 | Si24 |
| 4.5331788071081558  | 10.7607300468693232 | 15.1913242461302911 | Si25 |
| 11.7220244256370503 | 1.3838077241582432  | 12.0680702576580092 | Si26 |
| -4.4596559142554160 | 10.7511083989711054 | 15.1966420685871810 | Si27 |
| 7.2544886427386253  | 9.1842778938144445  | 12.0754129752020063 | Si28 |
| -0.0319839661151116 | 2.9941504716196352  | 15.2066583368642316 | Si29 |
| 4.5180579579878986  | 10.7437579131837087 | 12.0724198848082143 | Si30 |
| 2.7145952508372742  | 1.3957527055462238  | 15.2086937751893636 | Si31 |
| -4.4832953339701813 | 10.7857179018326832 | 12.0653819731382672 | Si32 |
| 11.6847962787749928 | 1.4081756519335584  | 15.2003074925556465 | Si33 |

---

---

|                     |                     |                     |      |
|---------------------|---------------------|---------------------|------|
| -0.0219739908460965 | 2.9883651756634895  | 12.0980935712686613 | Si34 |
| 7.2567945584085463  | 9.1779153963971982  | 15.1983624503681334 | Si35 |
| -1.4686861548104293 | 12.3026271219992296 | 5.0867411488106411  | Si36 |
| 1.6721612200148561  | 12.4564548234719332 | 22.1185387353929030 | Si37 |
| 11.5973138458364389 | 4.8217929318184298  | 5.0887631926326478  | Si38 |
| 10.0100133949413550 | 7.5184814193897038  | 22.1136080149862657 | Si39 |
| 4.3251882698648352  | 7.3719586739137970  | 5.0848963623589363  | Si40 |
| 2.9246605466643265  | 4.6548237559654693  | 22.1564557757537095 | Si41 |
| 1.6860033894897128  | 12.3604273708480576 | 5.1658641053553138  | Si42 |
| -1.4796905635401654 | 12.2918050274787749 | 22.1680016440645957 | Si43 |
| 9.9727826291980577  | 7.5198072935453535  | 5.1732169786417863  | Si44 |
| -2.7477985623495589 | 4.8424283001953148  | 22.1396320720760755 | Si45 |
| 2.8022924690245232  | 4.6158068703406574  | 5.1668398990178410  | Si46 |
| 4.2570388964844774  | 7.4816129974269590  | 22.1868515379348281 | Si47 |
| -1.5186884857915883 | 12.2339439182430763 | 8.3040516317105322  | Si48 |
| 1.6528664891565743  | 12.4683248112429652 | 18.9048930643739581 | Si49 |
| -2.7441611383860458 | 4.8124141422109616  | 8.3073823739571786  | Si50 |
| 9.9783082175702589  | 7.4539734984652553  | 18.8897778979831585 | Si51 |
| 4.2980281622635594  | 7.4530671467368359  | 8.3049354430689775  | Si52 |
| 2.9510030211948060  | 4.6820048630782001  | 18.9316605330311951 | Si53 |
| 1.6320578451306114  | 12.4206099969322974 | 8.3865048827628677  | Si54 |
| -1.5004998393453670 | 12.2437313876808211 | 18.9537058580921851 | Si55 |
| 9.9549789747717909  | 7.4421338336405762  | 8.3961638417387139  | Si56 |
| -2.7053410730010921 | 4.8255739071730979  | 18.9252639210422089 | Si57 |
| 2.8891151575477103  | 4.6349887832694536  | 8.3907911627738390  | Si58 |
| 4.3221124938443998  | 7.5190402078310319  | 18.9742374854402840 | Si59 |
| 7.2177517660331363  | 4.0009616508336050  | 2.6296109635988341  | Si60 |
| -0.0312169508858933 | 8.1446158569064515  | 24.6415292922905600 | Si61 |
| 0.0131554240367473  | 8.1597860610362218  | 2.6465083867771715  | Si62 |
| 7.2014616854896456  | 3.9109841105759604  | 24.7349142819668408 | Si63 |
| 7.2194145741280273  | 3.9946281733850335  | 6.3669041234429038  | Si64 |
| 0.0316573244602818  | 8.1822538955858271  | 20.8797060784636770 | Si65 |
| 0.0113742912681127  | 8.1686685995212631  | 6.3927737232080295  | Si66 |
| 7.1703298305716423  | 3.9797056304960967  | 20.9275471482635282 | Si67 |
| 7.2232372339219886  | 3.9919948910102487  | 9.5964595052400838  | Si68 |
| 0.0458784438510884  | 8.1778898876607240  | 17.6514661757333080 | Si69 |
| 0.0082788679615575  | 8.1668422515403236  | 9.6239547239937906  | Si70 |
| 7.2035063607608993  | 3.9979886161375400  | 17.7000502587752848 | Si71 |
| 7.1882824996876025  | 6.4024196014549677  | 22.8833664747789776 | All  |
| 7.8408711391516945  | 4.3893481994036216  | 0.4975161339680756  | H1   |
| -0.0143802362520109 | 8.9017931165454467  | 0.5188061104899809  | H2   |
| -0.1114902817142189 | 8.8773601073290322  | 26.7711537346887383 | H3   |
| 7.6872483532943230  | 4.2818301820140308  | 26.8962661084409689 | H4   |
| 6.0809820973925737  | 8.6244614961732182  | 22.9975854691662605 | H5   |

---



|                     |                     |                     |     |
|---------------------|---------------------|---------------------|-----|
| 8.1600454344377962  | 9.9969217347746486  | 23.0536067714334969 | H6  |
| -6.1106359370417236 | 10.5906697562728258 | 25.4032276297257482 | H7  |
| 7.5757606240516528  | 9.0194866510699025  | 25.3289306383401218 | H8  |
| 5.2883063351913373  | 10.1086684381614802 | 25.6810280650341696 | H9  |
| 6.0807541785158383  | 11.6840625889295531 | 25.7383047742580402 | H10 |
| 7.5002020993471223  | 10.7849604084688213 | 27.7010710797454713 | H11 |
| 6.4721708154701547  | 9.3524082446452983  | 27.7031731495205840 | H12 |
| 5.5487823914028427  | 12.2526783409545192 | 28.1354393918961456 | H13 |
| 4.4520672476334102  | 10.8724900129561650 | 28.0837850842575847 | H14 |
| 6.7843233963965925  | 11.0899176180258348 | 30.0731919608113785 | H15 |
| 5.5074359341527392  | 9.8741534267198503  | 30.0815694141529981 | H16 |
| 3.8090647702683826  | 11.7369563274309421 | 30.4981592833629023 | H17 |
| 12.3589564796358129 | 0.3905108348484073  | 30.5526615985815972 | H18 |
| 6.1556207461123291  | 11.5303941977545215 | 32.4729733696087521 | H19 |
| 4.7102327270561100  | 10.5206555163117645 | 32.4618104190591552 | H20 |
| 12.0045292249191125 | 1.0503292622966214  | 32.9844777219265808 | H21 |
| 10.5219765572820538 | 0.0978438468993545  | 32.9130064209185917 | H22 |
| 5.5978352373467049  | 12.0882470110709157 | 34.8945211671906748 | H23 |
| 4.0693552743239536  | 11.2131118176828224 | 34.8455799117823375 | H24 |
| 11.2268123747463431 | 0.4644876746134505  | 36.6392806462115956 | H25 |
| 10.0428659653817984 | 0.8661588499783531  | 35.3757730681113642 | H26 |
| 5.2400581660935588  | 10.9413308589580485 | 23.4351327594299832 | H27 |
| 6.2082854647733114  | 10.7800000412459074 | 21.8553009585763114 | H28 |
| 11.5933925634160957 | 1.7282315889510986  | 35.4452570821673802 | H29 |
| -4.9384350778617314 | 11.4030096640622745 | 19.4942152999584195 | H30 |
| -6.6962978990639792 | 12.4335910214809733 | 18.0539045377991911 | H31 |
| 13.4486359345560782 | 1.6855244459388203  | 18.9937136804549311 | H32 |
| -0.7082744207730083 | 2.4258602392834092  | 21.3584258617685734 | H33 |
| 1.0617065057431414  | 1.4149102185409357  | 22.7805474596177717 | H34 |
| -4.6746615866546257 | 12.1452218858224956 | 21.8562338882243097 | H35 |
| 6.1698408780933978  | 10.6530531311665584 | 22.9400457287175570 | C1  |
| 7.2556089753686051  | 10.2415932483494050 | 23.6195872929803485 | C2  |
| 7.3838538427366158  | 10.0874193529996834 | 25.1052323990971331 | C3  |
| 6.2310307138885648  | 10.6124891869111515 | 25.9587772991351642 | C4  |
| 6.4819382421996599  | 10.4298780155477804 | 27.4580333186851568 | C5  |
| 5.4826097765287187  | 11.1702392142435389 | 28.3490487028955798 | C6  |
| 5.7142746627158232  | 10.9334088683341797 | 29.8432759737430793 | C7  |
| 4.8797339008099900  | 11.8356177023058269 | 30.7542401611652814 | C8  |
| 5.0742939255899389  | 11.5411135653094501 | 32.2428960356400296 | C9  |
| 11.5957544857494934 | 0.0397916991552934  | 33.1694964097259017 | C10 |
| 4.5256635937495044  | 12.2003728900488433 | 34.6544343425111023 | C11 |
| 11.118226059777454  | 0.7436659409590061  | 35.5806234489433635 | C12 |
| -5.5946926414585256 | 12.1768436167596050 | 19.8989172376426815 | C13 |
| 0.6335051261372124  | 0.2526512925297220  | 19.0928848650125751 | C14 |

|                     |                     |                     |     |
|---------------------|---------------------|---------------------|-----|
| -0.2078580638420513 | 1.2388631852376515  | 19.6188195831400130 | C15 |
| -0.0548872897132734 | 1.6551962664483735  | 20.9454944258405682 | C16 |
| 0.9378234721248716  | 1.0851001269637541  | 21.7470579665968380 | C17 |
| 1.7727560978509900  | 0.0932169513415145  | 21.2247694844720947 | C18 |
| TS3                 |                     |                     |     |
| 7.1179256540036704  | 3.9976141169583150  | 0.9809644808617021  | O1  |
| -0.0192212138061656 | 8.1100402739476642  | 0.9998682773267726  | O2  |
| 5.8321273438913366  | 3.3123957963266260  | 3.1376567626792169  | O3  |
| 1.1526095977061228  | 9.1380194729748432  | 24.1050692500032859 | O4  |
| 8.5085991159359331  | 3.2068628864495143  | 3.1436741357223581  | O5  |
| -1.4638079374504072 | 8.7863325339673519  | 24.1085240321992949 | O6  |
| 7.2838307757139589  | 5.5678683123692911  | 3.1603647952015681  | O7  |
| 0.1307507079412105  | 6.6462258177060312  | 24.1279506801897199 | O8  |
| 1.2234859333785906  | 9.1240004068890936  | 3.1623722708901236  | O9  |
| 5.9148613335117748  | 3.0936767949855688  | 24.1795740489112383 | O10 |
| -1.4189610887869231 | 8.8230148828441823  | 3.1863932218998650  | O11 |
| 8.5632865729392886  | 3.2119147214310098  | 24.1131569030538877 | O12 |
| 0.1597377448605566  | 6.6630505255044952  | 3.1581400731168139  | O13 |
| 7.1549974738789111  | 5.4902733433901236  | 24.2695667605736141 | O14 |
| 4.9828081918070888  | 1.1490177670876907  | 4.4432435846130227  | O15 |
| 2.3089843751575145  | 11.1446956275617914 | 22.7948846050237499 | O16 |
| 10.8095210364520025 | 3.5475021670265723  | 4.4430841083206314  | O17 |
| -3.6846664485569529 | 8.9335970630484667  | 22.6759528242840105 | O18 |
| 5.8151250682429652  | 7.3937428555417508  | 4.4356852508255100  | O19 |
| 1.3447463931465085  | 4.7099628069316948  | 22.7836787425917286 | O20 |
| 2.3991898867527119  | 11.0672497142206954 | 4.5464391762758680  | O21 |
| 4.8427219914332991  | 1.1121872524529735  | 22.7769780733435638 | O22 |
| -3.7001043034630436 | 8.8535370384449781  | 4.5583864233442659  | O23 |
| 10.8459779885546954 | 3.6047243015175012  | 22.7992855627078619 | O24 |
| 1.2576501039223138  | 4.6728173922439442  | 4.5440688752551592  | O25 |
| 5.7995760224187523  | 7.6488840519569248  | 22.8930117177434092 | O26 |
| -1.2817200005413831 | 4.8378456091090687  | 22.7452046023220298 | O27 |
| 8.4531732803449753  | 7.5278296832989788  | 4.5274476189548736  | O28 |
| -2.0922684792981974 | 11.0221137656373855 | 22.8434040949311914 | O29 |
| 9.5945537651593913  | 1.2043662903101116  | 4.5229732046332485  | O30 |
| 3.4757316952099977  | 8.7875238853859408  | 22.8877998271358258 | O31 |
| 3.5509276220223569  | 3.3702684209676863  | 4.5063334801457247  | O32 |
| 8.5664659863414840  | 7.5399505718543542  | 22.8252981721822685 | O33 |
| -1.3741320109127397 | 4.8923255470661138  | 4.4225233292098354  | O34 |
| 9.6528880073927414  | 1.2586594400264806  | 22.6777846174687987 | O35 |
| -2.2041012635027704 | 11.0294878977379565 | 4.4498755067203346  | O36 |
| 3.6482778292505271  | 3.4676451539759170  | 22.8428030420910595 | O37 |
| 3.5272893636939466  | 8.6774523682820011  | 4.4237746402074238  | O38 |
| 5.8693329559310543  | 3.2523824113331763  | 5.8130584423292193  | O39 |

---

|                     |                     |                     |     |
|---------------------|---------------------|---------------------|-----|
| 1.2753753178534346  | 9.1177505704916850  | 21.4190221634463107 | O40 |
| 8.5439149118750599  | 3.2815160608225091  | 5.8202565831721742  | O41 |
| -1.3668022449177362 | 8.8769277122078165  | 21.4126139469051751 | O42 |
| 7.1801382967211760  | 5.5824083684677710  | 5.8342228992332075  | O43 |
| 0.1603241115067524  | 6.6832467260646649  | 21.4517111730486327 | O44 |
| 1.2883723829123239  | 9.0260465703030253  | 5.8383553255705056  | O45 |
| 5.9259761633252497  | 3.1258111028995064  | 21.4766126515650271 | O46 |
| -1.3835493490861603 | 8.9151955601952455  | 5.8624445926522224  | O47 |
| 8.5836737988619802  | 3.3468422445168144  | 21.4182328131296522 | O48 |
| 0.0502369153526523  | 6.6582680411852948  | 5.8322993339792841  | O49 |
| 7.0476160234579961  | 5.5594197422671021  | 21.3961129203411211 | O50 |
| 7.1918680365434930  | 4.0191571719273664  | 7.9517715641256084  | O51 |
| 0.0437851245228833  | 8.1808917864705659  | 19.2947267362891033 | O52 |
| 0.0025303652782851  | 8.1852672704431875  | 7.9773687529425326  | O53 |
| 7.1491865330749258  | 3.9093855606527024  | 19.3101752734384604 | O54 |
| -1.6598941617616356 | 12.3537513759679207 | 6.6951146045019172  | O55 |
| 1.7901473911384453  | 12.3585459214113520 | 20.4986903879350102 | O56 |
| 11.6609108245064856 | 4.7154351607615643  | 6.6781078581128970  | O57 |
| 9.9127126607648925  | 7.6691874012983066  | 20.5126835020777598 | O58 |
| 4.3818256391115806  | 7.5467081746389777  | 6.6728991906530535  | O59 |
| 2.8100869139599869  | 4.5978233936577420  | 20.5850338072389256 | O60 |
| 1.7810410425670433  | 12.3960718568665769 | 6.7601531401497805  | O61 |
| -1.7115772682067147 | 12.2892093512329765 | 20.5470185106441114 | O62 |
| 9.8963986140945455  | 7.6321525776049342  | 6.7602977346218909  | O63 |
| 11.6937830036210677 | 4.6747684198731507  | 20.5263320307130854 | O64 |
| 2.7342283961305744  | 4.5473715522018328  | 6.7466050466746621  | O65 |
| 4.3560971903040384  | 7.7228911471718238  | 20.6314301134975473 | O66 |
| 0.0852177456864736  | 12.3683648809421456 | 4.7026918483063627  | O67 |
| 7.2751083319320582  | 0.0536327710495536  | 22.5143432071288423 | O68 |
| 10.7488317065395442 | 6.1961739099730746  | 4.6819685678602081  | O69 |
| -3.4994927195204077 | 6.2759070791412954  | 22.5201726807087965 | O70 |
| 3.5451126208302646  | 6.0232565341877500  | 4.6760043535460589  | O71 |
| 3.5862711465963324  | 6.1349944867334720  | 22.6194348047081135 | O72 |
| 0.0289357694887720  | 12.3525177831022450 | 8.7599708158530163  | O73 |
| 0.0076696342974110  | 12.4038234149607636 | 18.5103849518894421 | O74 |
| 10.8099443633295600 | 6.1432766167259096  | 8.7628919225640765  | O75 |
| 10.8215367380257614 | 6.1740397514689827  | 18.4941897069126782 | O76 |
| 3.5860349933923881  | 6.0728404994320302  | 8.7465044533452456  | O77 |
| 3.5898023129530485  | 6.1673924291562310  | 18.5879493261831072 | O78 |
| 4.8257466424175561  | 0.9894248364111582  | 8.9399127214177661  | O79 |
| 2.4236059455988688  | 11.2905296724354027 | 18.1892689924794411 | O80 |
| 11.0125712126228876 | 3.4759524527776313  | 8.8913533915450653  | O81 |
| -3.8446243583290260 | 8.8341315931274575  | 18.2624590473505464 | O82 |
| 5.7846313998544518  | 7.5951498807241684  | 8.8856591195084338  | O83 |

---

---

|                     |                     |                     |      |
|---------------------|---------------------|---------------------|------|
| 1.4117037588542694  | 4.6219959429964046  | 18.3521109696653753 | O84  |
| 2.4337183570995169  | 11.1982187007392593 | 9.0180681063997579  | O85  |
| 4.8035075324203635  | 1.0408463300879633  | 18.3346211951112608 | O86  |
| -3.8384793930103123 | 8.8001930986522954  | 9.0207549182816145  | O87  |
| 11.0371370494170993 | 3.5141503819630611  | 18.2523745861903457 | O88  |
| 1.3847636334986730  | 4.5679375942173071  | 9.0154049948921031  | O89  |
| 5.7875863439674085  | 7.6933442502231708  | 18.4115444627760034 | O90  |
| -1.2144061120831171 | 4.9954326590020575  | 18.4245950140499453 | O91  |
| 8.4174304561649365  | 7.3144945545375712  | 8.9100099234571903  | O92  |
| -2.1909987410239973 | 10.9005958318150888 | 18.3920338155866894 | O93  |
| 9.4602308516582401  | 1.3301746000933152  | 8.9113702878699250  | O94  |
| 3.3957506005804623  | 8.8279898477007883  | 18.4800177129579808 | O95  |
| 3.7566188577852699  | 3.4140881030555041  | 8.8898197561482650  | O96  |
| 8.4191259221371286  | 7.3395512530544718  | 18.3777318300547066 | O97  |
| -1.2285561744819915 | 4.9675668197604992  | 8.7766387596340874  | O98  |
| 9.4200709188734422  | 1.4171558611030441  | 18.4171739105484633 | O99  |
| -2.1752542896770226 | 10.8524968384472711 | 8.7767022740932958  | O100 |
| 3.8065587107172583  | 3.5047051976692063  | 18.4251154024954928 | O101 |
| 3.3898594678962155  | 8.7331875319783894  | 8.7832105276376193  | O102 |
| 6.0789820495377000  | 3.0003359704874719  | 10.1366146277942555 | O103 |
| 1.1407667495981624  | 9.2336916619924718  | 17.1158382007117353 | O104 |
| 8.6575287624817889  | 3.5686587606796416  | 10.1182171694576741 | O105 |
| -1.4381644300362502 | 8.6583061750125800  | 17.1520171255834200 | O106 |
| 6.8742868600972038  | 5.5137464057291181  | 10.1249716274452179 | O107 |
| 0.3458339351358539  | 6.7130513060430985  | 17.1074822080800750 | O108 |
| 1.1533800643371768  | 9.1757433111295921  | 10.1590771399400275 | O109 |
| 6.0508638892006434  | 3.0283815820505673  | 17.0706229243529179 | O110 |
| -1.4432019213949578 | 8.6966246549241486  | 10.1521206173732601 | O111 |
| 8.6272100961222158  | 3.6278312973189180  | 17.1304765848122429 | O112 |
| 0.2691933342804460  | 6.6883300715777549  | 10.1543201468573852 | O113 |
| 6.8147874584576478  | 5.5471764545874809  | 17.2237123897053195 | O114 |
| 3.8951274475701911  | 2.0441109627350049  | 11.1803556220628746 | O115 |
| 3.4304501690684326  | 9.9941768690327759  | 16.1005360184967898 | O116 |
| 10.5989681549829058 | 2.1921414369715735  | 11.1664547763223165 | O117 |
| -3.2328777240574382 | 10.1866824833084451 | 16.0532070463956664 | O118 |
| 7.0981173054269782  | 7.8872044548512017  | 11.1650179919443033 | O119 |
| -0.0361589464020948 | 4.3247264824301892  | 16.1393617058640544 | O120 |
| 3.4553443054583770  | 9.9436253501854068  | 11.1413660454881480 | O121 |
| 3.7763904780777486  | 2.1385029550011985  | 16.1499085088677106 | O122 |
| -3.2565310300163643 | 10.3128855735807985 | 11.1391445119238348 | O123 |
| 10.4579104417472006 | 2.1099604755552583  | 16.0708891655469372 | O124 |
| -0.2130505553126172 | 4.3156821634196803  | 11.1380290115515574 | O125 |
| 7.1185802434326675  | 7.8903504963764100  | 16.1220488941056743 | O126 |
| -4.7850807876051125 | 12.3937297867823215 | 11.7698939215473981 | O127 |

---

---

|                     |                     |                     |      |
|---------------------|---------------------|---------------------|------|
| 4.5175121496255626  | 12.3514171541106563 | 15.5711348771247398 | O128 |
| 13.1775430212290026 | 1.9653140187314582  | 11.8030080084080904 | O129 |
| 8.6073928457839344  | 10.0044004438822522 | 15.5762111393528855 | O130 |
| 6.0084551079171922  | 10.2278220181985748 | 11.8256210802387294 | O131 |
| 1.2251195017028795  | 2.0963475967295571  | 15.4654335506728327 | O132 |
| 4.4418336783166827  | 12.3327586899843169 | 11.6623428022141731 | O133 |
| -4.6588788309831841 | 12.3541432689475794 | 15.5477499852999639 | O134 |
| 8.6130820011413896  | 9.9781931427571227  | 11.6697191603968200 | O135 |
| 13.0492577659099460 | 2.1282828529641198  | 15.5386451610797760 | O136 |
| 1.3469089828875151  | 2.2867356679981117  | 11.7779966414084818 | O137 |
| 5.9959394893233107  | 10.2035055732570452 | 15.4498166521754037 | O138 |
| 3.1388056199807703  | 1.6497971691112818  | 13.6554674424583773 | O139 |
| 4.0712576911357816  | 10.5586353065292720 | 13.6261160591117854 | O140 |
| 11.2561852809310263 | 1.6108599775284442  | 13.6242863587954552 | O141 |
| -4.0949563874810551 | 10.5926352289069072 | 13.6141441098670626 | O142 |
| 7.2870152063312066  | 8.7318734134954621  | 13.6358347339261172 | O143 |
| -0.1152112826525302 | 3.5253833340625205  | 13.6435690737337527 | O144 |
| -0.0328990907649258 | 8.0949333732984563  | 26.2856777118231228 | O145 |
| 7.2017271066179047  | 3.7586120414309976  | 26.3471157313376381 | O146 |
| 5.0614401420981583  | 2.7713192048241386  | 4.4669932647021247  | Si1  |
| 2.0460818877072589  | 9.5355334491979065  | 22.8013713939360620 | Si2  |
| 9.3610967055553420  | 2.8127889308569318  | 4.4757695273996951  | Si3  |
| -2.1389103751106213 | 9.4033738636153057  | 22.7592704592985662 | Si4  |
| 7.1809988426824063  | 6.5153217911904493  | 4.4826187724999746  | Si5  |
| 0.0777590237481967  | 5.7261915030905906  | 22.7824030940988465 | Si6  |
| 2.1101543483609086  | 9.4679572136328378  | 4.4870965598209427  | Si7  |
| 5.1009877841240314  | 2.7265559436291169  | 22.8281472136954662 | Si8  |
| -2.1719040295361012 | 9.4069898391828399  | 4.5085937943457992  | Si9  |
| 9.3868308753177452  | 2.8746187783366786  | 22.7610200520505899 | Si10 |
| 0.0193212565424998  | 5.7237109015525167  | 4.4821845474248212  | Si11 |
| 4.6267310625509364  | 2.3676743590751412  | 9.7751151047732350  | Si12 |
| 2.6052732918903692  | 9.8366188343536702  | 17.4859250176355410 | Si13 |
| 9.9331752800819579  | 2.6287994114386830  | 9.7596841989025602  | Si14 |
| -2.6798800092562440 | 9.6519099703728184  | 17.4790217473237171 | Si15 |
| 7.0550663242541605  | 7.0864576270188024  | 9.7604859460652627  | Si16 |
| 0.1229491573406438  | 5.1552872663348941  | 17.5180661425325859 | Si17 |
| 2.6157836873662585  | 9.7671298458117342  | 9.7659056888526692  | Si18 |
| 4.6047672623085028  | 2.4286274830558110  | 17.5102472874658730 | Si19 |
| -2.6859416047229350 | 9.6701474063199910  | 9.7646948746458619  | Si20 |
| 9.8842734687473666  | 2.6627812829264195  | 17.4824452370858197 | Si21 |
| 0.0531417656003694  | 5.1258683969952523  | 9.7611023366079941  | Si22 |
| 7.0432249455448437  | 7.1199693170440730  | 17.5488643173443819 | Si23 |
| 2.7022197378585715  | 1.4622837134777480  | 12.0996674703531699 | Si24 |
| 4.5031184280244725  | 10.7774850102261848 | 15.1801460678975513 | Si25 |

---

---

|                     |                     |                     |      |
|---------------------|---------------------|---------------------|------|
| 11.6784800716639197 | 1.4021821864883952  | 12.0696693218252129 | Si26 |
| -4.4581656455084708 | 10.7852509029684942 | 15.1867557124434818 | Si27 |
| 7.2461738855368782  | 9.2086884268817535  | 12.0807643127306967 | Si28 |
| -0.0757988261530977 | 3.0199592521308327  | 15.1915457235493747 | Si29 |
| 4.4961256659334889  | 10.7642279223598223 | 12.0688682357569057 | Si30 |
| 2.6791884277147684  | 1.4347855277088415  | 15.2019426603177088 | Si31 |
| -4.4909071101101876 | 10.8213239007180704 | 12.0538036798370030 | Si32 |
| 11.6286096333863096 | 1.4258938306043942  | 15.1949922171609462 | Si33 |
| -0.0590429114306448 | 3.0225956351788166  | 12.0956866119514270 | Si34 |
| 7.2483865066922579  | 9.2042742661313177  | 15.1934199229382472 | Si35 |
| -1.4987191950902385 | 12.3485863794220982 | 5.0872154076805787  | Si36 |
| 1.6326124151082535  | 12.4676197048757373 | 22.1069344378844619 | Si37 |
| 11.5694807736888645 | 4.8420433193043344  | 5.0700273308863864  | Si38 |
| 10.0019906446164768 | 7.5703691330381613  | 22.1359665398351950 | Si39 |
| 4.3141742777201895  | 7.4067436175017285  | 5.0643009337984166  | Si40 |
| 2.8697370046267316  | 4.7354701076565204  | 22.1961924036924003 | Si41 |
| 1.6545732894902843  | 12.3858613956265167 | 5.1473885839010194  | Si42 |
| -1.5224007327773865 | 12.3791792156423757 | 22.1506148039343991 | Si43 |
| 9.9595853345989713  | 7.5464138291359006  | 5.1461849326227700  | Si44 |
| 11.6354257969510257 | 4.8608209096813448  | 22.1365998811088964 | Si45 |
| 2.7762697489668895  | 4.6582516919502543  | 5.1321053336607205  | Si46 |
| 4.3315531938613816  | 7.5422617685722075  | 22.2496532177697297 | Si47 |
| -1.5377814331948132 | 12.2659887851852982 | 8.3052177197086294  | Si48 |
| 1.5916866060290404  | 12.4944389630551420 | 18.8964376729297676 | Si49 |
| -2.7692044332957844 | 4.8333160957924299  | 8.2901373004604704  | Si50 |
| 9.9417618088278026  | 7.4881006695110059  | 18.9119939685129808 | Si51 |
| 4.2833097595505922  | 7.4759776423877264  | 8.2846370660565629  | Si52 |
| 2.9090523736797702  | 4.7340213359043766  | 18.9790563447395186 | Si53 |
| 1.6134907629328463  | 12.4398284116401818 | 8.3694626183930172  | Si54 |
| -1.5658405276660412 | 12.2949364667401184 | 18.9360832680618785 | Si55 |
| 9.9368822828968213  | 7.4673878785792853  | 8.3695689607837682  | Si56 |
| -2.7547209916411060 | 4.8501075457275880  | 18.9178012106085909 | Si57 |
| 2.8659914355605589  | 4.6592241672758110  | 8.3560881448221469  | Si58 |
| 4.2853827561766495  | 7.5809238424747738  | 19.0239596169500587 | Si59 |
| 7.1965818097277996  | 4.0285657009711686  | 2.6043693591079649  | Si60 |
| -0.0514370028542448 | 8.1745091044701219  | 24.6598629691166451 | Si61 |
| -0.0139732802605481 | 8.1936608534866462  | 2.6233036497404232  | Si62 |
| 7.2126246676472698  | 3.9500805925454063  | 24.7183510264150925 | Si63 |
| 7.1963685358268190  | 4.0339413051541939  | 6.3480537839858693  | Si64 |
| 0.0259166947642919  | 8.2093021336628720  | 20.8961822157381327 | Si65 |
| -0.0105435257375834 | 8.1958411335929231  | 6.3727492561135515  | Si66 |
| 7.1745051549414915  | 4.0384158800443215  | 20.9237282314628850 | Si67 |
| 7.2012272166421631  | 4.0254413120073673  | 9.5787580806398900  | Si68 |
| 0.0242256887745649  | 8.1986680082727350  | 17.6687838491119891 | Si69 |

---

|                     |                     |                     |      |
|---------------------|---------------------|---------------------|------|
| -0.0053198860072152 | 8.1875745044568013  | 9.6052162601777429  | Si70 |
| 7.1616704836210179  | 4.0359186331900689  | 17.7006084488682696 | Si71 |
| 7.1546133140763999  | 6.5147534415285140  | 22.8604566932107751 | Al1  |
| 7.8267383583557883  | 4.4253225391900921  | 0.4770289723308380  | H1   |
| -0.0289637849864528 | 8.9373050509619816  | 0.4950790604993132  | H2   |
| -0.1035697709500365 | 8.9254527492147169  | 26.7804194428063340 | H3   |
| 7.5781279520154854  | 4.4916256223779305  | 26.8566723724352663 | H4   |
| 5.5329166765412658  | 10.4658135487247428 | 21.4430225743720051 | H5   |
| 7.4777061441103063  | 9.5697324016140861  | 22.6120155011213662 | H6   |
| 7.9656541570736401  | 10.1213754621756085 | 24.8539800424182644 | H7   |
| 6.6184276251820719  | 9.0642197808985348  | 24.7927159005740378 | H8   |
| 5.0062305355599515  | 11.0227823315440254 | 25.2268987183475701 | H9   |
| 6.3995447658557785  | 12.0998185329011854 | 25.3647353851113344 | H10  |
| 7.2734334895602455  | 10.6412659402343710 | 27.2731450110032547 | H11  |
| 5.8237878429464027  | 9.6451064943461002  | 27.1349906001105623 | H12  |
| 13.1131864261903601 | 0.1376243019523442  | 27.8461116202687151 | H13  |
| 4.4121193192469095  | 11.7110407738857472 | 27.6304433400910767 | H14  |
| 6.5700512567381999  | 11.0298454677595892 | 29.7157738887898297 | H15  |
| 5.0149497271850514  | 10.2183027173542929 | 29.5300519218934596 | H16  |
| 3.8480115774866768  | 12.4240141122358168 | 30.0423663665172391 | H17  |
| 12.6423399663387563 | 0.6710159610121958  | 30.2888690093533448 | H18  |
| 5.8833016566661422  | 11.4961393705434727 | 32.1541092161406397 | H19  |
| 4.2568381088354643  | 10.8499759434289142 | 31.9341388000298920 | H20  |
| 12.1581475901425389 | 1.2451308617086083  | 32.7172793605756098 | H21  |
| 10.5210082183206577 | 0.6467422535352233  | 32.4521999998567665 | H22  |
| 5.2360980202477112  | 12.0572307044849723 | 34.5800015470363036 | H23  |
| 3.5796815530142716  | 11.5100252208679361 | 34.3281448666185511 | H24  |
| 10.8964594141079374 | 0.6414283588692631  | 36.2319612374326923 | H25  |
| 9.9433293880275677  | 1.3321037443827513  | 34.9008697748751118 | H26  |
| 4.8615896567451777  | 11.1883641383456123 | 22.9838413741970697 | H27  |
| 6.2782166668084338  | 11.8831334992005822 | 22.1771467457440004 | H28  |
| 11.6142796309522929 | 1.8694525294200697  | 35.1673786134577853 | H29  |
| -5.0885402608641366 | 10.7121187904390247 | 20.3150098089034934 | H30  |
| -6.5233529070445391 | 12.1953893557184525 | 18.9099727492948837 | H31  |
| -0.3357131746471986 | 1.7347996779745045  | 19.9112564747966481 | H32  |
| 0.1059665899981312  | 2.3205126033020429  | 22.2899683681116692 | H33  |
| 1.5787983235090954  | 0.8647215826592363  | 23.6757244420798045 | H34  |
| -4.6578182115841109 | 11.2931594132428774 | 22.6907249040680803 | H35  |
| 5.7597146002849398  | 10.9153047047552061 | 22.4177439893988861 | C1   |
| 6.7437052937211126  | 10.1683059164185181 | 23.1617279669146718 | C2   |
| 6.8852777205045790  | 10.1379761976007270 | 24.6088317527585652 | C3   |
| 6.0699859551529638  | 11.0572804276278678 | 25.5144901455653468 | C4   |
| 6.2042416439432175  | 10.6733736844409961 | 26.9955460619444381 | C5   |
| 5.4675993458950556  | 11.6238447900427886 | 27.9448390198764187 | C6   |

|                     |                     |                     |     |
|---------------------|---------------------|---------------------|-----|
| 5.5189376143249405  | 11.1953710424152391 | 29.4167220085223420 | C7  |
| 4.8818496113114680  | 12.2119471480583393 | 30.3703997140392623 | C8  |
| 4.8604990103419130  | 11.7709258376667076 | 31.8374374389720991 | C9  |
| 11.5284762575367346 | 0.3390521528826110  | 32.7879620843512285 | C10 |
| 4.2371519230989731  | 12.3939165457730720 | 34.2507985535605428 | C11 |
| 10.9501083380762534 | 0.9907148404536422  | 35.1899661925886846 | C12 |
| -5.5472100399652557 | 11.6040315560406917 | 20.7480193755382096 | C13 |
| 0.8655549346669098  | -0.0666507591268338 | 19.9623290700712914 | C14 |
| 0.2889471369355063  | 1.0803047056428954  | 20.5241022908352910 | C15 |
| 0.5337123011869300  | 1.4106940893567819  | 21.8651332797591671 | C16 |
| 1.3545851321917133  | 0.5904186937527237  | 22.6431144296193665 | C17 |
| -5.3091520280717281 | 11.9294637820358655 | 22.0917934077088738 | C18 |
| Benzene             |                     |                     |     |
| 14.8747817779742277 | 15.0159289811664607 | 14.9340037495855853 | C1  |
| 14.8194535895164741 | 15.0460844130526290 | 13.5378262259756834 | C2  |
| 13.5909465638813103 | 15.2035697628956008 | 12.8905707169376491 | C3  |
| 12.4176895985957358 | 15.3309977718984332 | 13.6392709920262813 | C4  |
| 12.4729793374717879 | 15.3009849661937007 | 15.0352484767070766 | C5  |
| 13.7015495267721974 | 15.1433452685087673 | 15.6826933646248694 | C6  |
| 15.8347823972974080 | 14.8930540806239726 | 15.4398503569640653 | H1  |
| 15.7363220125607057 | 14.9465311305411479 | 12.9527926728653888 | H2  |
| 13.5477558331395116 | 15.2271353540732139 | 11.7995227630840951 | H3  |
| 11.4577874687922510 | 15.4541468345409090 | 13.1333074913551133 | H4  |
| 11.5563315601882639 | 15.4005687215114175 | 15.6204594264487433 | H5  |
| 13.7449209038101809 | 15.1199529549939022 | 16.7736512734254433 | H6  |
| 1-dodecene          |                     |                     |     |
| 15.9245796150000984 | 23.6550311900000310 | 17.3806152449999018 | C1  |
| 17.0721950700000491 | 23.0067253150000184 | 17.6036014699999299 | C2  |
| 17.4409904549999339 | 21.6716842650000885 | 17.0320854199998806 | C3  |
| 17.7337646499999124 | 20.6149635299999190 | 18.1095962599999183 | C4  |
| 18.1454696499999812 | 19.2602901400000448 | 17.5323390900000931 | C5  |
| 18.5236091599999497 | 18.2258300700000575 | 18.5946235650000347 | C6  |
| 18.9664993350000088 | 16.8847007699999772 | 18.0067996850000611 | C7  |
| 19.4626960850000330 | 15.8788700000000205 | 19.0475597550000586 | C8  |
| 19.8872108399999448 | 14.5407848250000171 | 18.4403801049998961 | C9  |
| 20.4403152449999581 | 13.5393991599999097 | 19.4547844049999696 | C10 |
| 20.8796005250000505 | 12.2152452449999060 | 18.8260440900000958 | C11 |
| 21.4327392650000448 | 11.2166595450000628 | 19.8406944399998864 | C12 |
| 17.8170299649999819 | 23.4636154200000391 | 18.2679004549999391 | H1  |
| 18.3424835300001021 | 21.7826347199999049 | 16.3994254900001124 | H2  |
| 16.6350803499999991 | 21.3171348599998822 | 16.3671550699999848 | H3  |
| 16.8409137750000646 | 20.4942150000000112 | 18.7475051749999011 | H4  |
| 18.5337962949999024 | 20.9883098599999585 | 18.7740688450001159 | H5  |
| 19.0019893700000608 | 19.4024944400000621 | 16.8481254549999093 | H6  |



|                     |                     |                     |     |
|---------------------|---------------------|---------------------|-----|
| 17.3249301749999809 | 18.8629360150000025 | 16.9076252099999991 | H7  |
| 19.3362045449999442 | 18.6344203849999346 | 19.2230491599999809 | H8  |
| 17.6685237750000468 | 18.0657043350000279 | 19.2761802799999771 | H9  |
| 19.7699604199999968 | 17.0609951050000994 | 17.2679157349999848 | H10 |
| 18.1291599299999007 | 16.4410400350000749 | 17.4372787400000782 | H11 |
| 18.6733741600000869 | 15.7083148950000133 | 19.8023357349999785 | H12 |
| 20.3160285999998891 | 16.3172111549999634 | 19.5970611550000129 | H13 |
| 20.6499652799999822 | 14.7240447900000149 | 17.6611385299998958 | H14 |
| 19.0248451400001173 | 14.0892505599999751 | 17.9164295100000359 | H15 |
| 21.2981300350000069 | 13.9920196499999268 | 19.9859790900001144 | H16 |
| 19.6789264699998867 | 13.3395843349999410 | 20.2312603150000569 | H17 |
| 21.6421089150001222 | 12.4181051399999021 | 18.0535583550000212 | H18 |
| 20.0236740199999375 | 11.7655305950000866 | 18.2924346850001029 | H19 |
| 21.7538299649999090 | 10.2816343349999446 | 19.3580093350000837 | H20 |
| 20.6757946149999938 | 10.9583597200000309 | 20.5974998600001058 | H21 |
| 15.1530399299999612 | 23.2375145100000680 | 16.7274455949999670 | H22 |
| 15.7140197899999023 | 24.6237583200000998 | 17.8367004550000985 | H23 |
| 22.3023510150000703 | 11.6326351050000909 | 20.3729400700000696 | H24 |

Dodecylbenzene

|                     |                     |                     |     |
|---------------------|---------------------|---------------------|-----|
| 16.5688796570304291 | 14.2891095590263486 | 8.8098622024054443  | H1  |
| 16.6585693788390792 | 13.0954534799040818 | 11.0220742179623681 | H2  |
| 14.9300263640409749 | 13.6134797045932938 | 12.7539697751358734 | H3  |
| 14.5165965026900405 | 15.0985541616921441 | 11.9037317013352446 | H4  |
| 16.8184491558747347 | 16.0024482431549302 | 12.3199332182228130 | H5  |
| 17.3082115805278463 | 14.4642798758483604 | 13.0357380855877469 | H6  |
| 15.5576922253152876 | 14.7476320422669112 | 14.8236318757955470 | H7  |
| 15.0802202974948703 | 16.2887135541040244 | 14.1181112334347674 | H8  |
| 16.0843939894579755 | 15.7937541232498528 | 17.0023961395167049 | H9  |
| 16.5498523470954346 | 16.7573267315637757 | 19.2696048721498805 | H10 |
| 15.4938418739628112 | 15.5160241936385450 | 9.5157951143292188  | H11 |
| 17.1554736146117293 | 15.3404200025335715 | 10.1179394503458209 | H12 |
| 13.3912709844214834 | 14.4773895031743489 | 9.6343695206324309  | H13 |
| 15.7237958858238027 | 11.0305376987496402 | 10.7470939833582211 | H14 |
| 13.8988616953004964 | 9.5428979124191393  | 9.9699000043719330  | H15 |
| 11.8018807879368630 | 10.5208603944194667 | 9.0286289339759715  | H16 |
| 11.5646819110858914 | 12.9975822256009259 | 8.8756804429740139  | H17 |
| 17.8789301548723891 | 15.6784426046373433 | 15.2396972487133890 | H18 |
| 17.3503886001814784 | 17.2359375053025019 | 14.6001683453719320 | H19 |
| 15.5700182298850951 | 17.3599811964488921 | 16.3805661322182274 | H20 |
| 17.8080940786283293 | 18.3399102045123072 | 16.9519473296941854 | H21 |
| 15.9956186957540893 | 18.3330568307494204 | 18.7072983313845604 | H22 |
| 18.2085009784726459 | 19.3455092687650101 | 19.3188371172984859 | H23 |
| 17.0014254447617787 | 17.6653800690763170 | 21.5925067139043492 | H24 |
| 16.4042869427013258 | 19.2416280712307426 | 21.0770586814638428 | H25 |

|                     |                     |                     |     |
|---------------------|---------------------|---------------------|-----|
| 17.8915125498509084 | 19.4638649726834494 | 23.0992333891303296 | H26 |
| 18.6181412228581493 | 20.2954022924099178 | 21.7071486746461488 | H27 |
| 19.2292476890185036 | 18.7063283924140897 | 22.2088019521912337 | H28 |
| 18.3619941172334258 | 16.7643681283644668 | 17.5239273130064461 | H29 |
| 18.7987282891206817 | 17.7674662087495605 | 19.8397533118668434 | H30 |
| 16.2816365494922692 | 14.7824886577389414 | 9.7501689091765638  | C1  |
| 15.8027576243314858 | 13.7542496376403260 | 10.7853429635698763 | C2  |
| 15.3523853368150007 | 14.4059258260825960 | 12.1117575768573715 | C3  |
| 16.4435544901089372 | 15.1393988427007944 | 12.8963145434260174 | C4  |
| 15.9463426258377332 | 15.6172621806026228 | 14.2629568608469803 | C5  |
| 13.5135329049794510 | 13.3942468547245888 | 9.7132607231809001  | C6  |
| 14.6963097231099589 | 12.8609647922155705 | 10.2499963487462225 | C7  |
| 14.8109292154921626 | 11.4658357119441234 | 10.3307769649489174 | C8  |
| 13.7825408979052586 | 10.6264008976670752 | 9.8953756411533451  | C9  |
| 12.6098297662819565 | 11.1718945032100940 | 9.3696348535932366  | C10 |
| 12.4801934569651092 | 12.5605987006278070 | 9.2804482416129623  | C11 |
| 16.9934701376215997 | 16.3296645185844049 | 15.1222001799348007 | C12 |
| 16.4546468866653086 | 16.7085183700633308 | 16.5036391153692463 | C13 |
| 17.4635678820613442 | 17.3998467234191168 | 17.4209402060305756 | C14 |
| 16.8970463515262246 | 17.7012158073797536 | 18.8102283841200872 | C15 |
| 17.8847079826326976 | 18.3837614016363666 | 19.7567139692387812 | C16 |
| 17.3198451070088275 | 18.6293942399774188 | 21.1574249106638028 | C17 |
| 18.3147227063164557 | 19.3102925225018183 | 22.0956214051056250 | C18 |

## References

1. D. Wang, C.-M. Wang, G. Yang, Y.-J. Du and W.-M. Yang, *Journal of Catalysis*, 2019, **374**, 1-11.
2. R. Y. Brogaard, R. Henry, Y. Schuurman, A. J. Medford, P. G. Moses, P. Beato, S. Svelle, J. K. Nørskov and U. Olsbye, *Journal of Catalysis*, 2014, **314**, 159-169.
3. J. N. Kondo, H. Yamazaki, R. Osuga, T. Yokoi and T. Tatsumi, *The Journal of Physical Chemistry Letters*, 2015, **6**, 2243-2246.
